# Supplementary material for: When more is less: Emergent suppressive interactions in three-drug combinations
Source: PubMed Central journal article supplement (PMC5420147; doi:10.1186/s12866-017-1017-3), 2017-05-06
Supplement: 12866_2017_1017_MOESM1_ESM.pdf [file 12866_2017_1017_MOESM1_ESM.pdf]

## **Supplementary Materials**

When more is less: emergent suppressive interactions in three-drug combinations

Casey Beppler, Elif Tekin, Cynthia White, Zhiyuan Mao, Jeffrey H. Miller, Robert Damoiseaux, Van M. Savage, and Pamela J. Yeh

### Supplementary Figure 1. Comparison of relative optical density measurement to growth rate measurement.

We performed experiments using 0.5, 0.75, 1, 1.25, 1.5 and 1.75  $\mu\text{g/ml}$  streptomycin in *E. coli* BW25113 and measured growth relative to the no-drug control every hour to determine the growth rate, i.e. the slope. We compared this with the result of  $\text{OD}_{600}$  measurement (relative to no-drug controls) at a single time point (18 hours). We found a correlation of  $r=0.74$  and  $P < 0.00001$ .

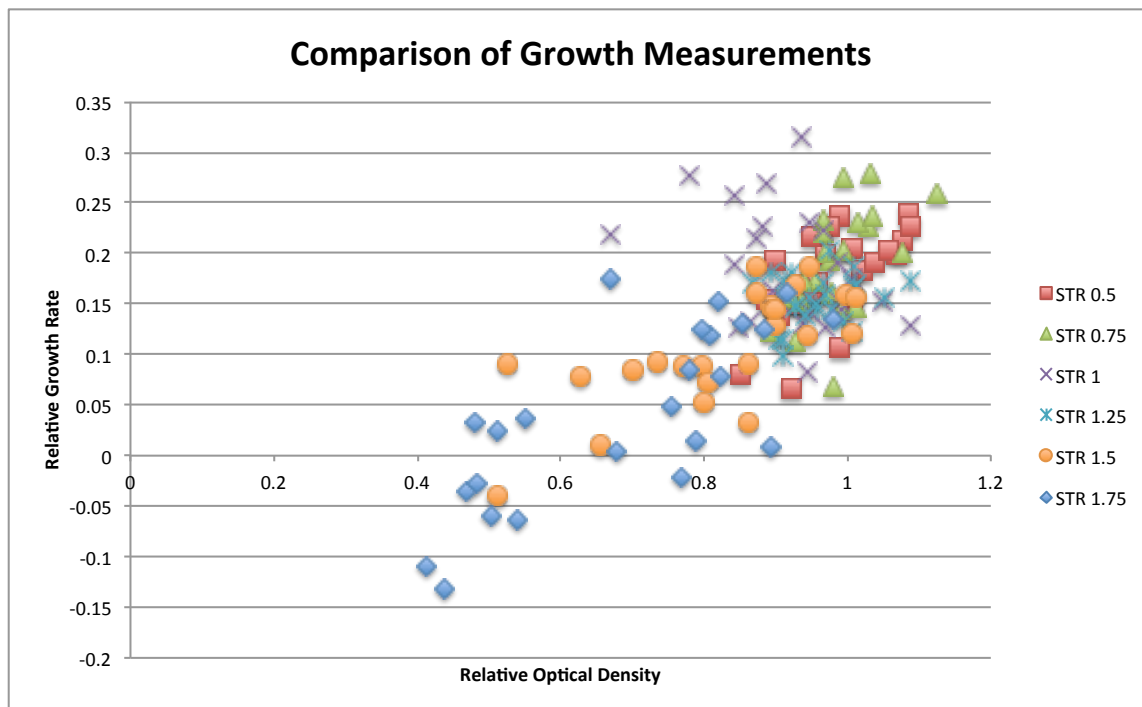

**Supplementary Figure 2. Comparison of relative optical density measurement to colony forming units.**

We performed experiments in *E. coli* BW25113 using streptomycin, erythromycin, cefoxitin, tobramycin, and clindamycin with 2-3 different concentrations per drug to compare counts based on colony forming units vs. OD<sub>600</sub> measurement at 18 hours (relative to no-drug controls). The concentrations (in µg/ml) were as follows: streptomycin 4.1, 5.7, and 11; erythromycin 75 and 121; cefoxitin 1.5, 2.9, and 9; clindamycin 60 and 75; and tobramycin 6, 4.8, and 3.8. This comparison yielded a correlation rate of 93% (n=14, P < 0.0001).

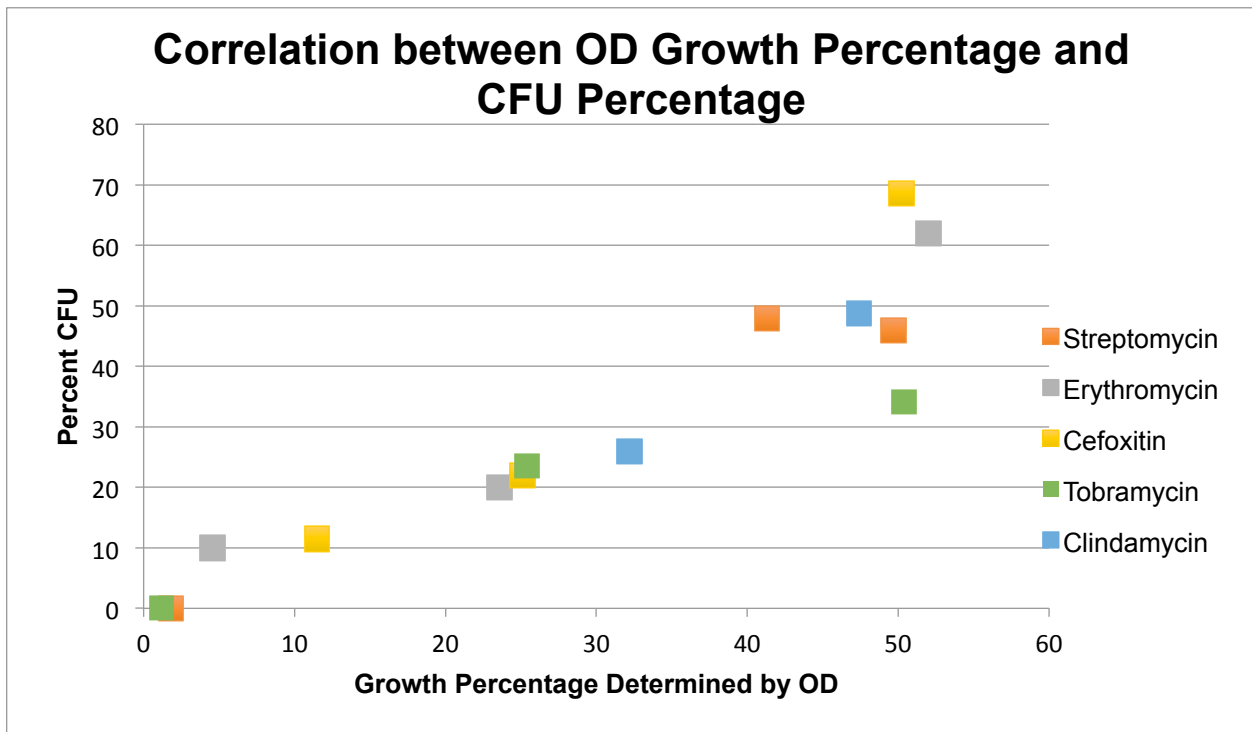

### **Supplementary Figure 3. Emergent three-way interaction measures in *E. coli* BW25113.**

All 46 three-drug suppressive combinations showing growth percentage in different drug environments: all three single drugs, all two-drug combinations, and the single three-drug combination. X-axis indicates the drug environment, and Y-axis indicates the growth rate relative to bacteria grown in no-drug environment. In a few of the cases, we find multiple levels of suppression in a single three-drug combination: two drugs are suppressing one or both drugs when examining pairwise and single drug effects, and three drugs suppress one of the two-drug pairs when examining higher-order effects. For example, in the experiments involving DOX, NTR, and AMP, DOX-NTR suppresses both DOX by itself and NTR by itself, and DOX-NTR-AMP suppresses DOX-AMP. We found no cases where the two-drug suppressive combination was the one being suppressed in the three-drug suppressive combination.

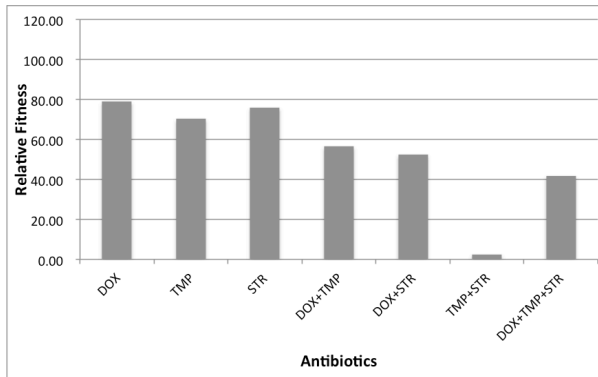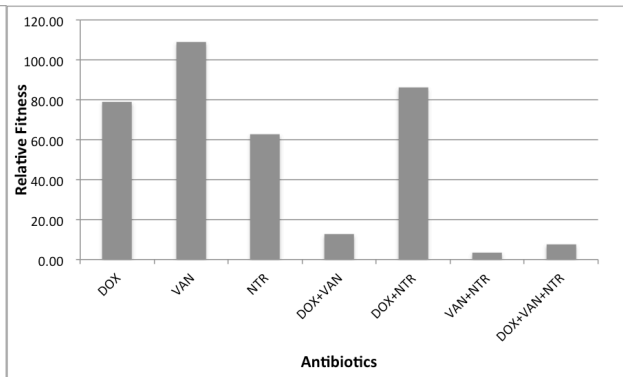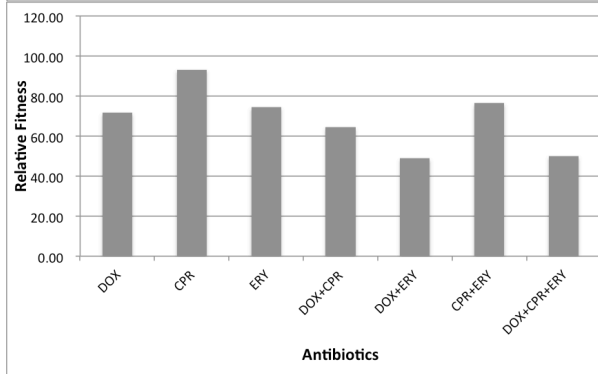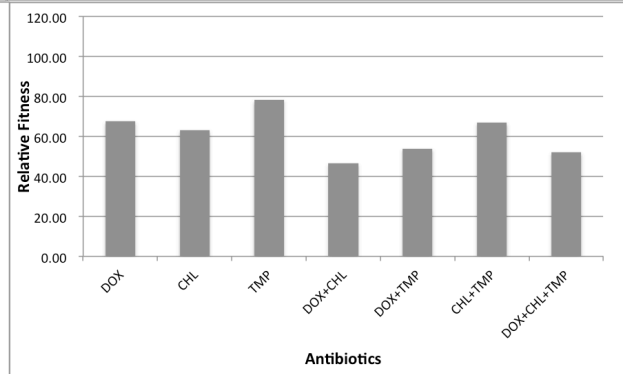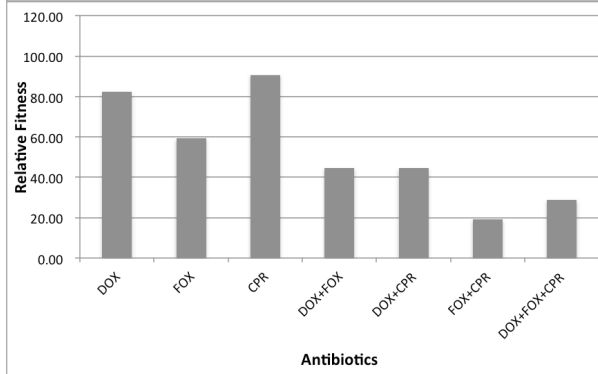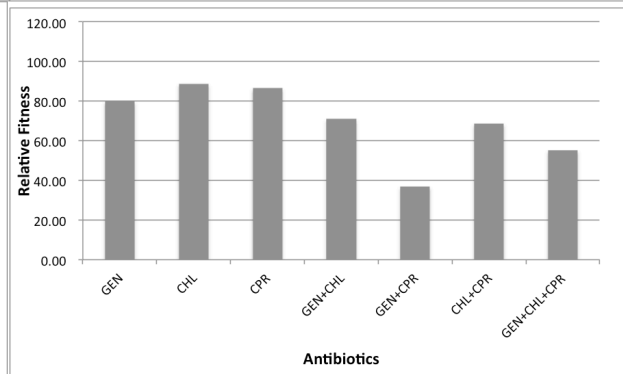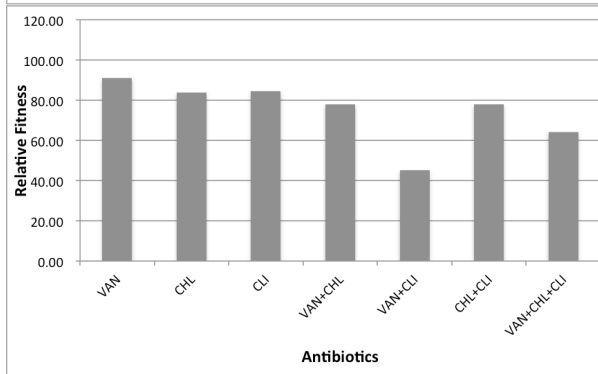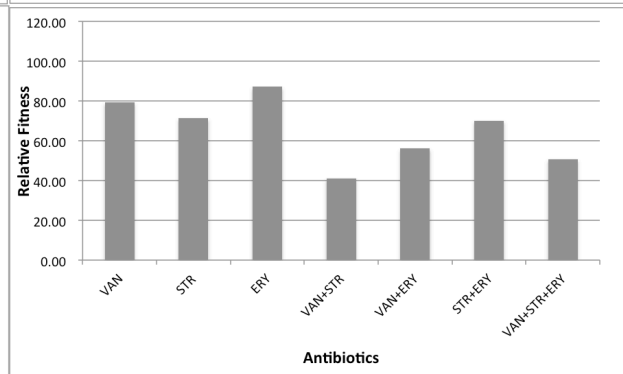

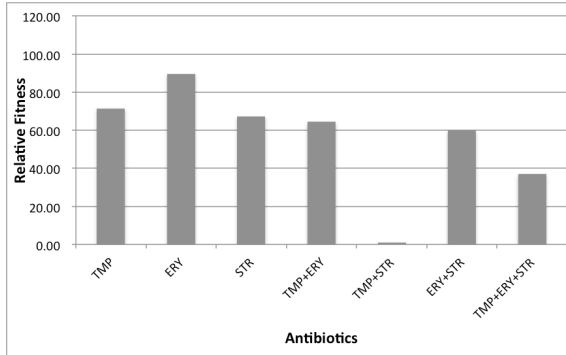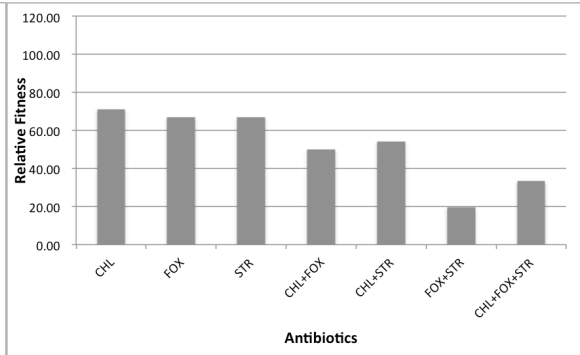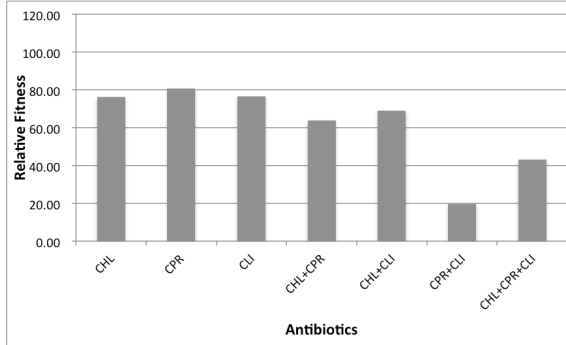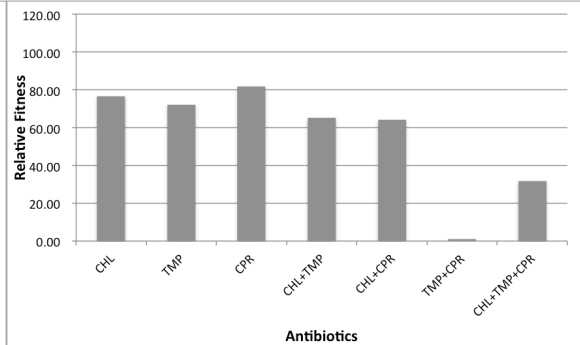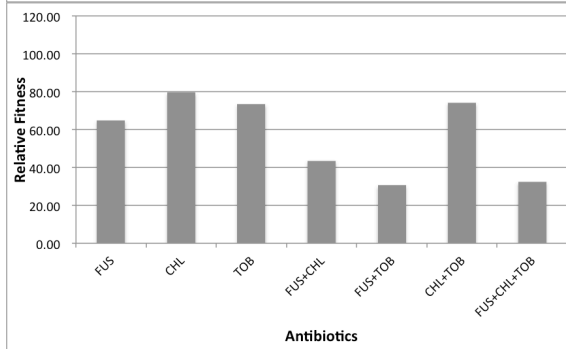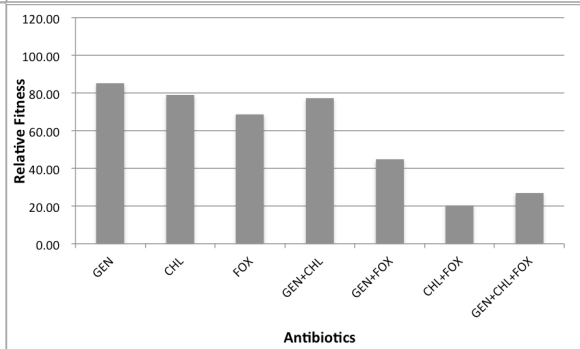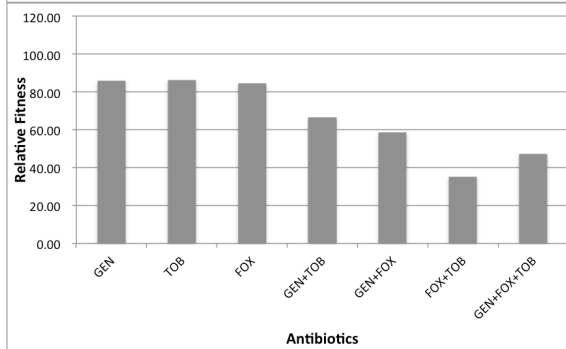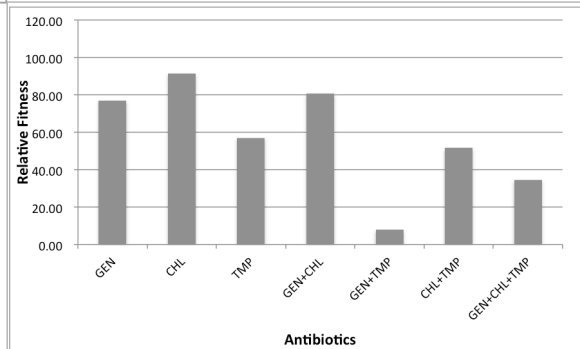

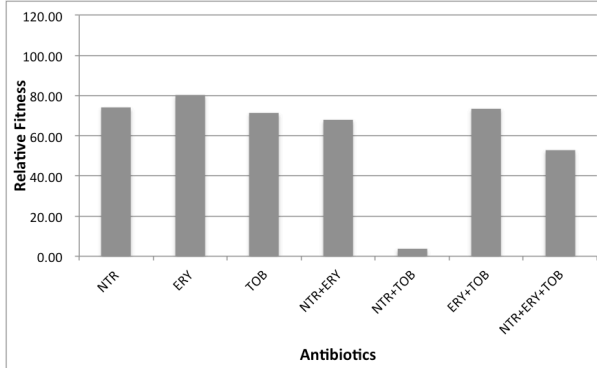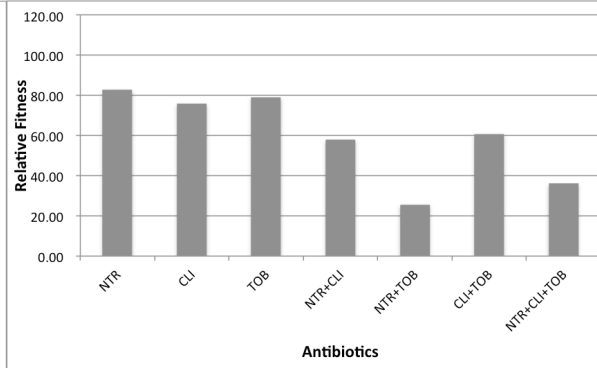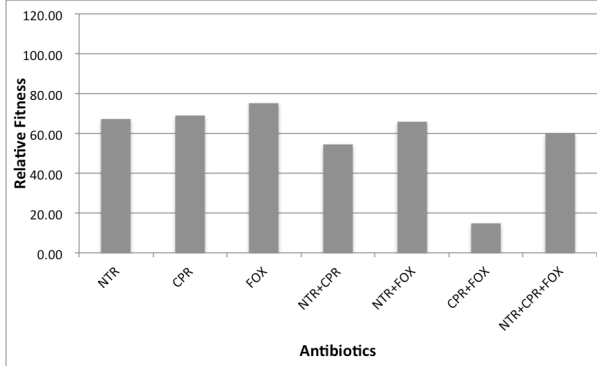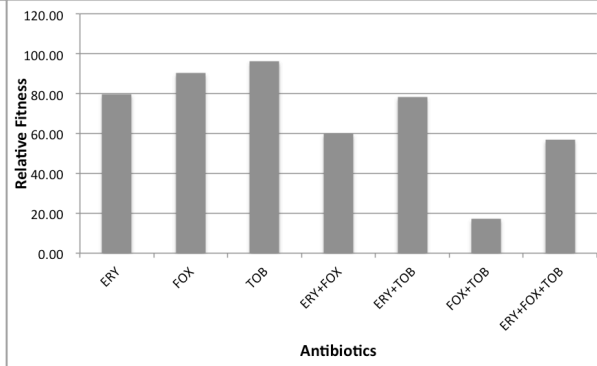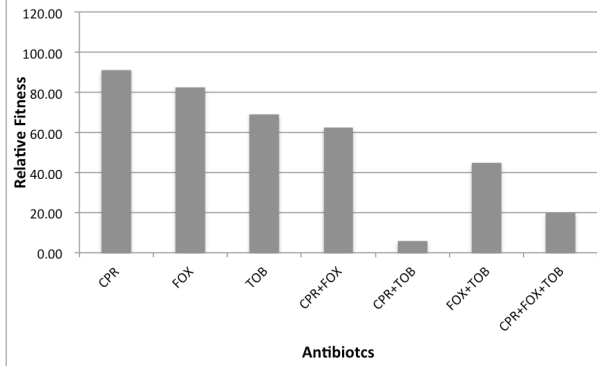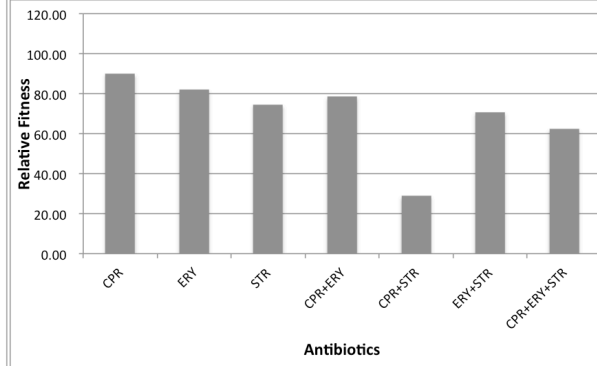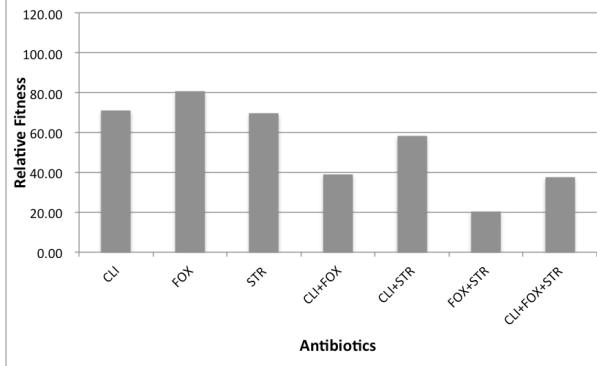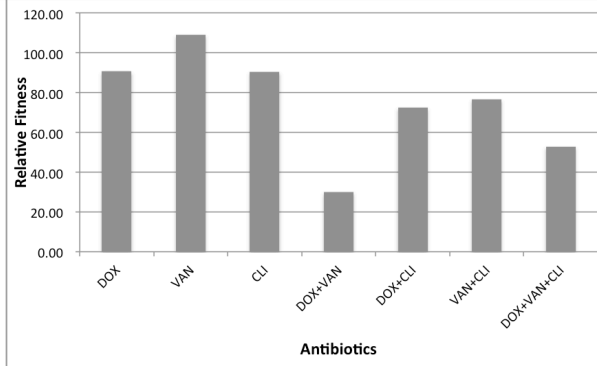

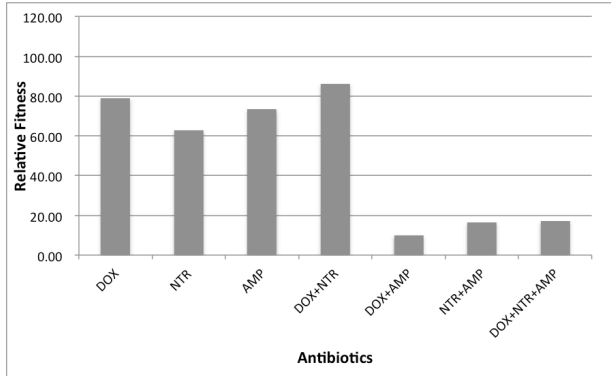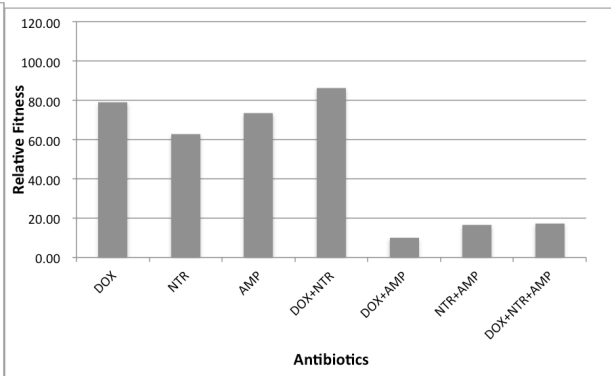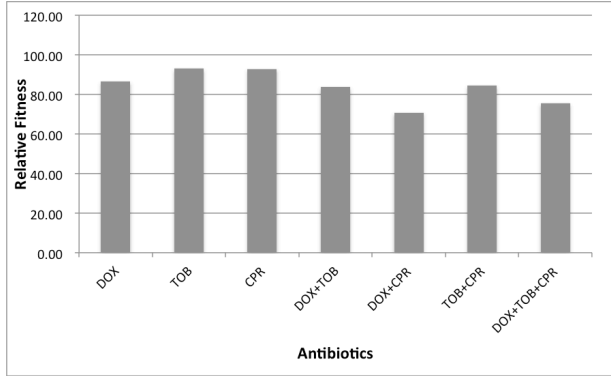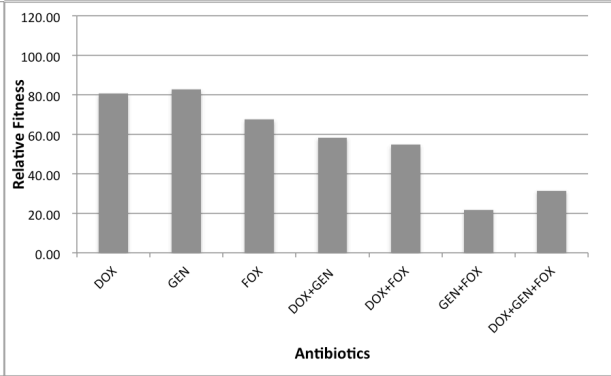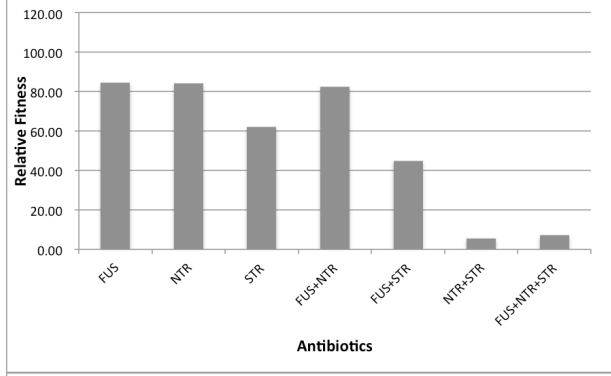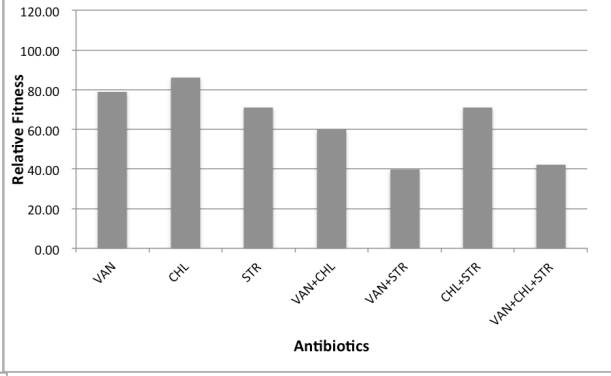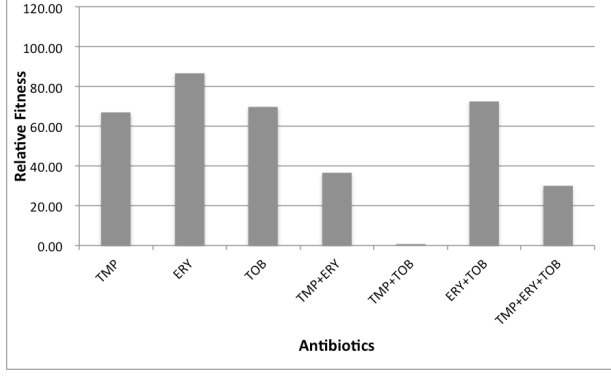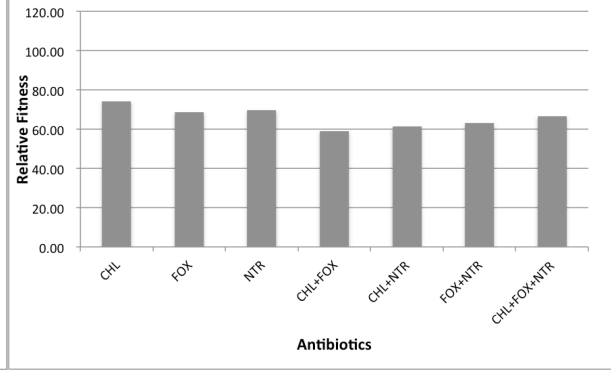



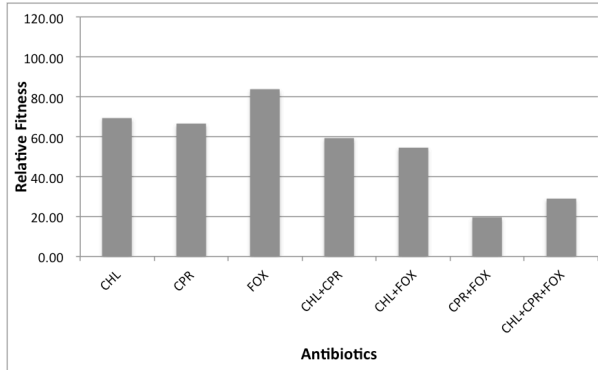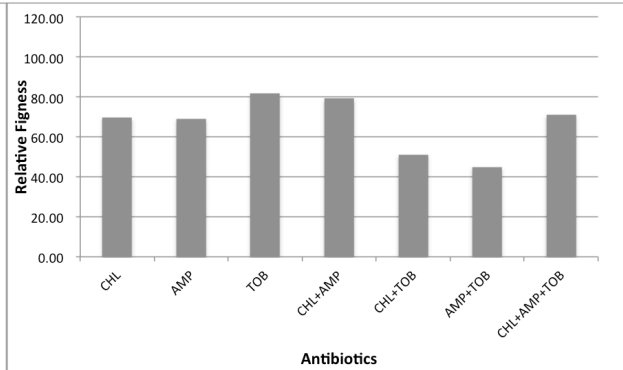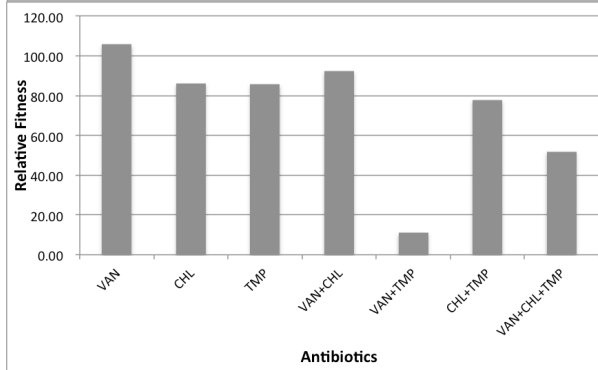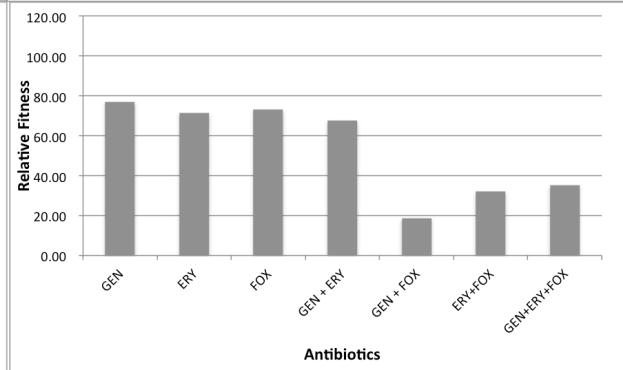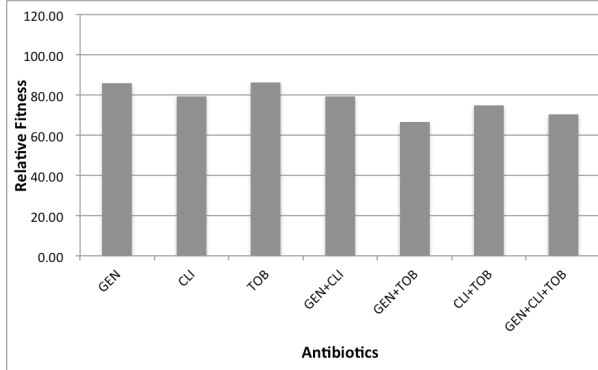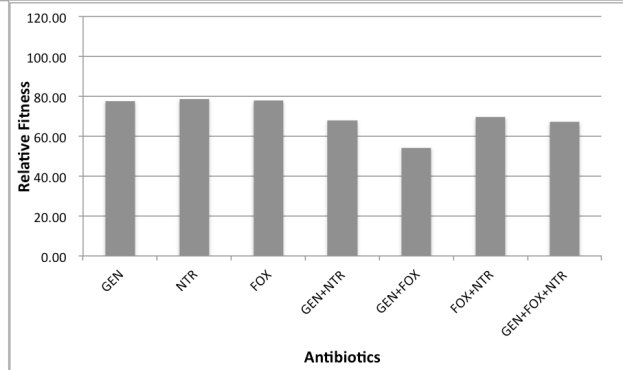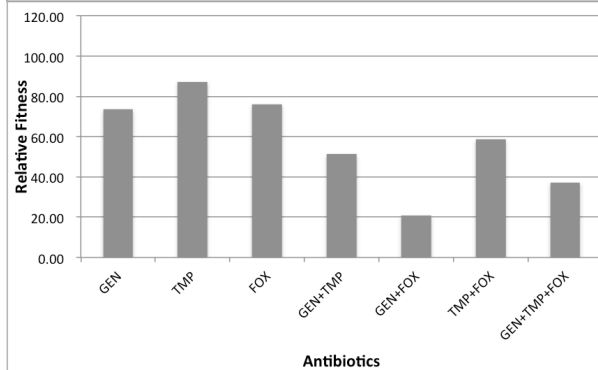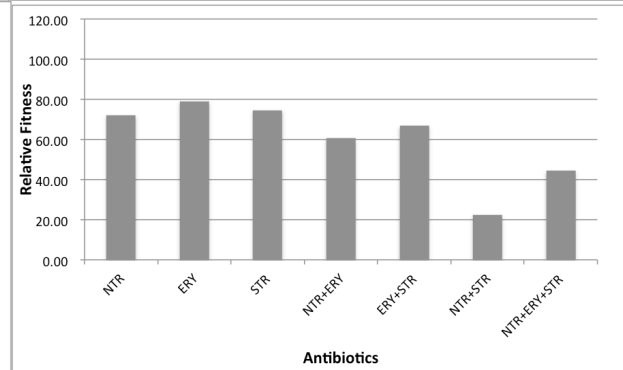

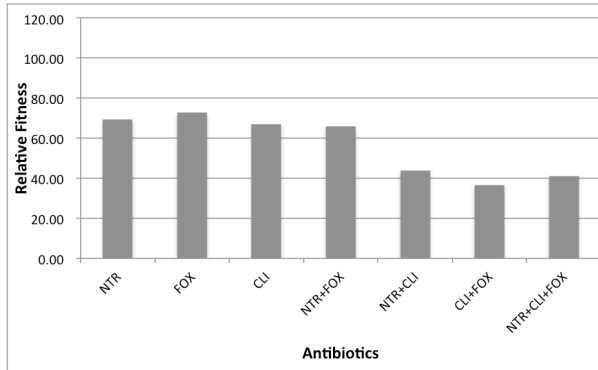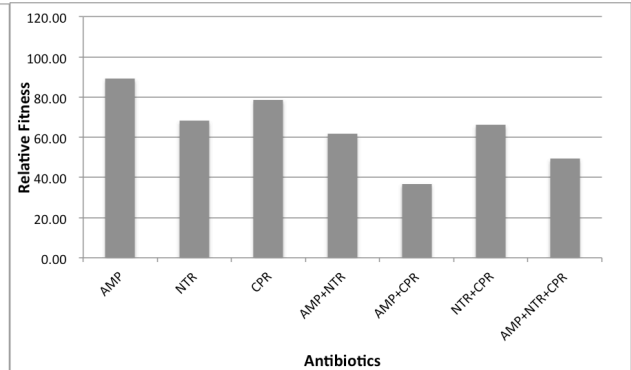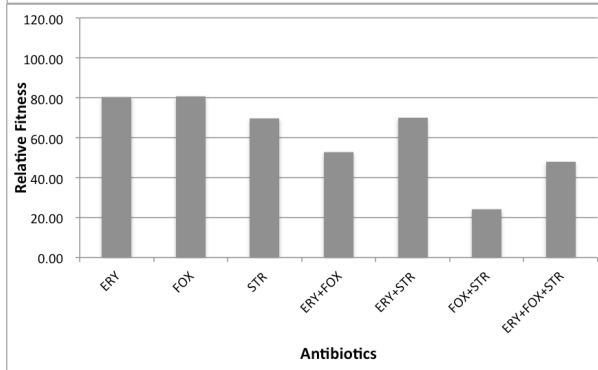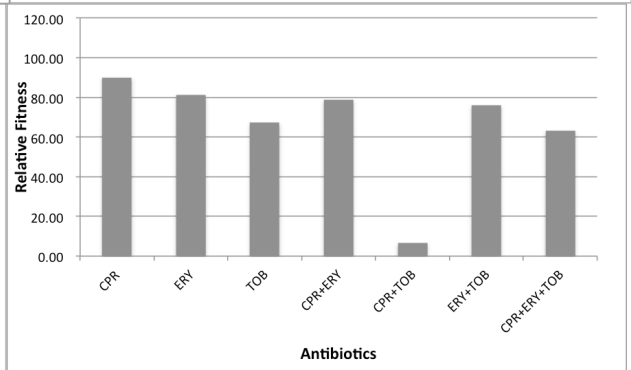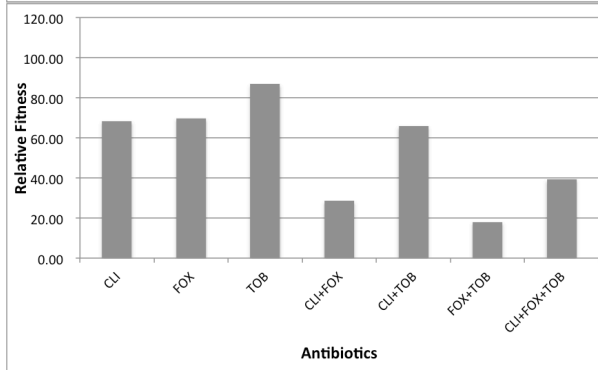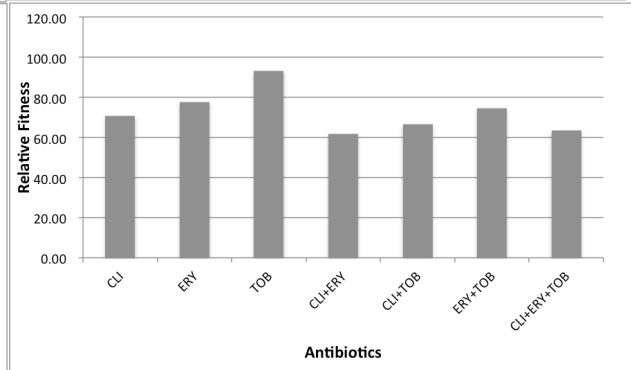

**Supplementary Figure 4. Suppressive three-drug interactions in *S. epidermidis* 14990 and *E. coli* CFT073.** Growth measurements are shown for bacteria in single-drug, two-drug, or three-drug conditions relative to the no-drug control (100% growth, not shown). Emergent suppression was determined following Tekin et al. (Tekin et al., 2016) (see Methods). The upper left figure is a schematic with X, Y, and Z representing three different drugs. Only the experimental data for the three-drug combination (X+Y+Z), the suppressed pairwise drug combination with the lower growth (Y+Z), and the suppressor single drug (X) is shown for simplicity. In *S. epidermidis* 14990, 35 triple combinations of a total 313 interaction measures were determined to be suppressive. In *E. coli* CFT073, 88 triple combinations of a total 356 interaction measures were determined to be suppressive. Antibiotic abbreviations are as listed in Table 1.

# *S. epidermidis* 14990

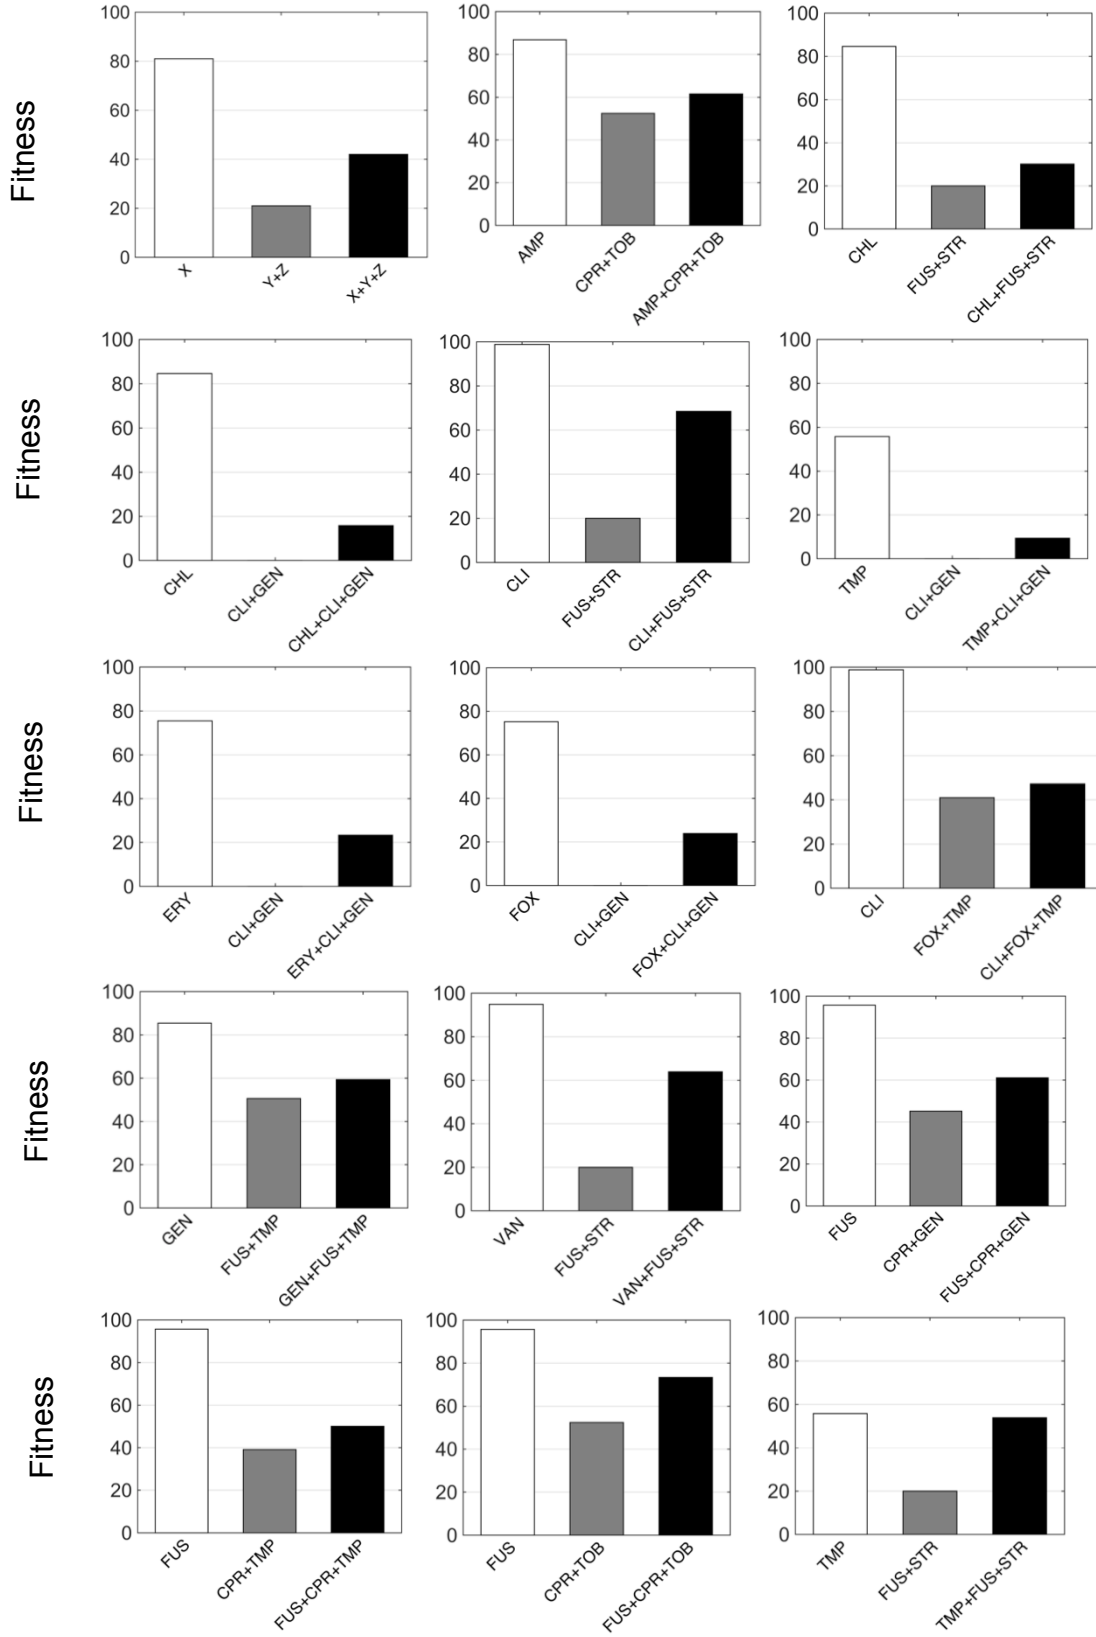

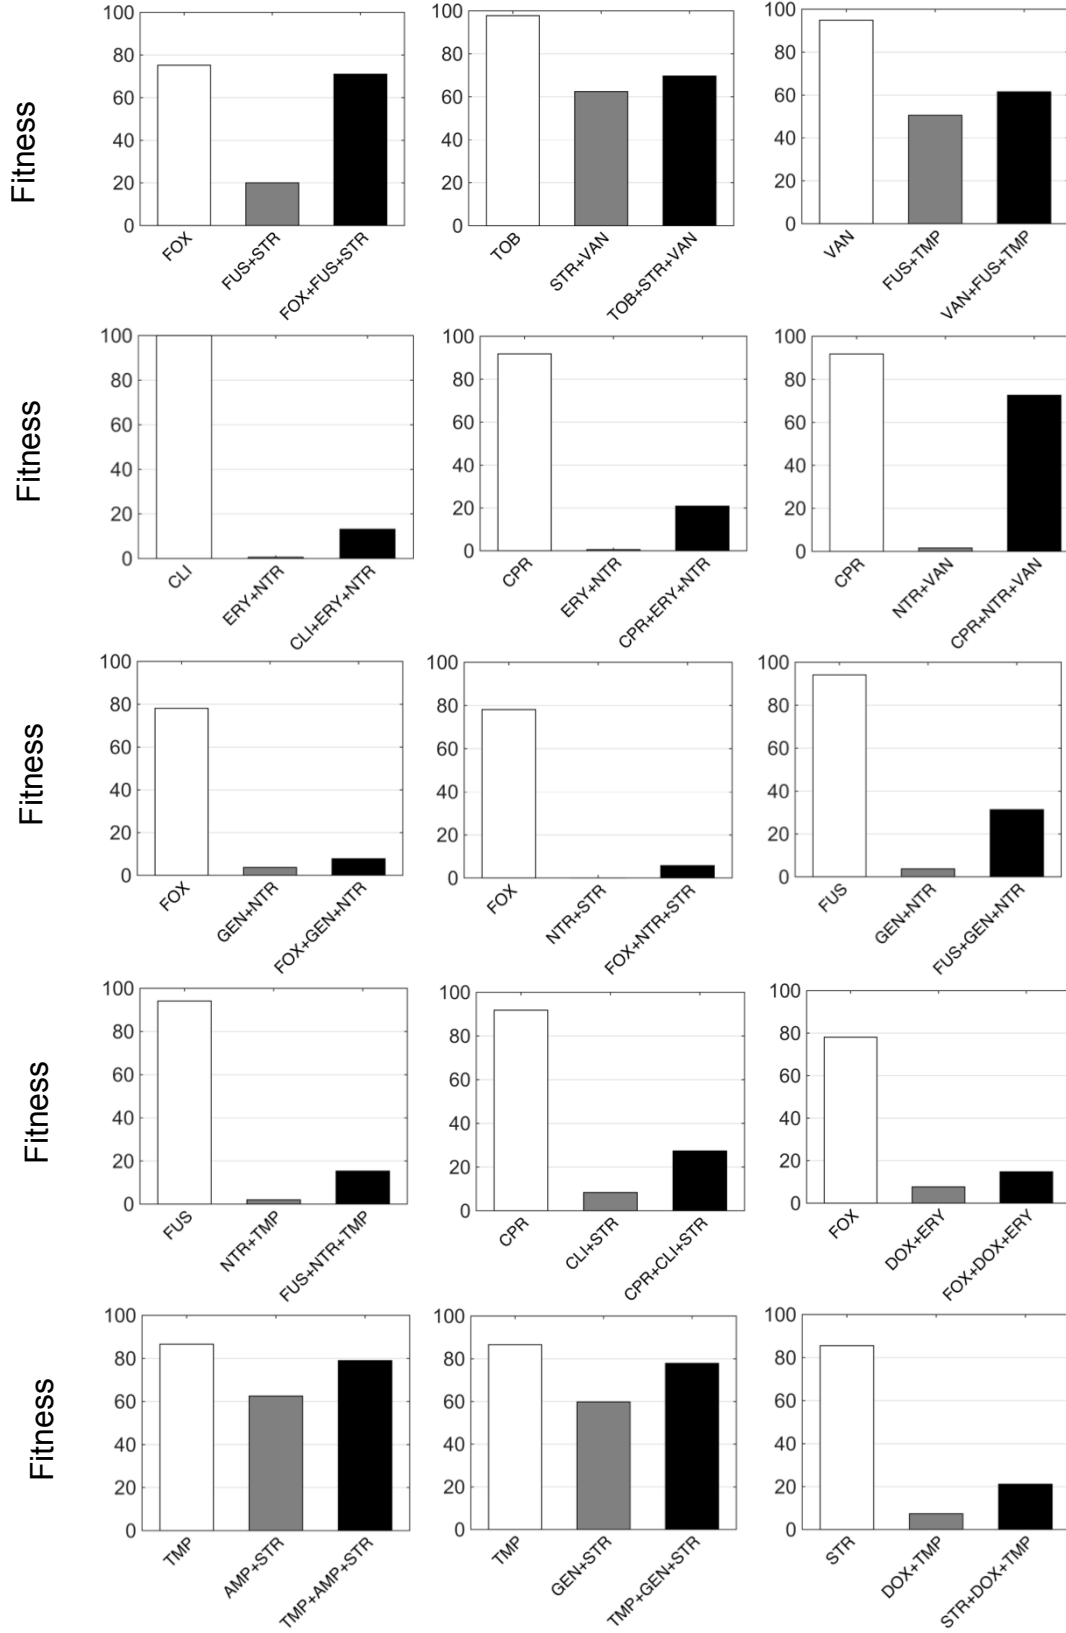

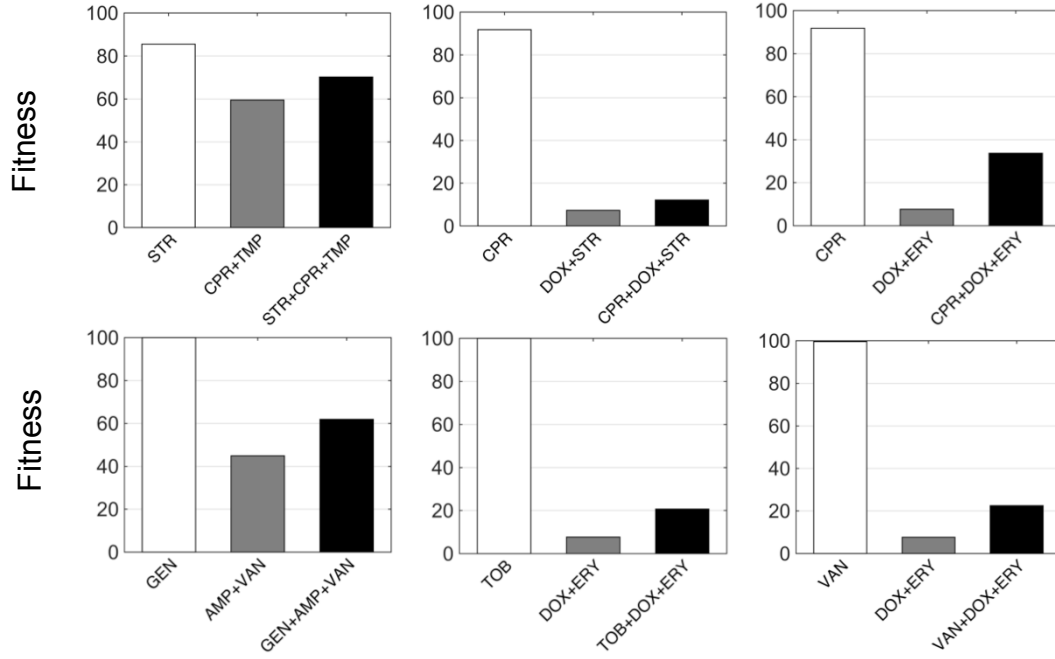

### *E. coli* CTF073

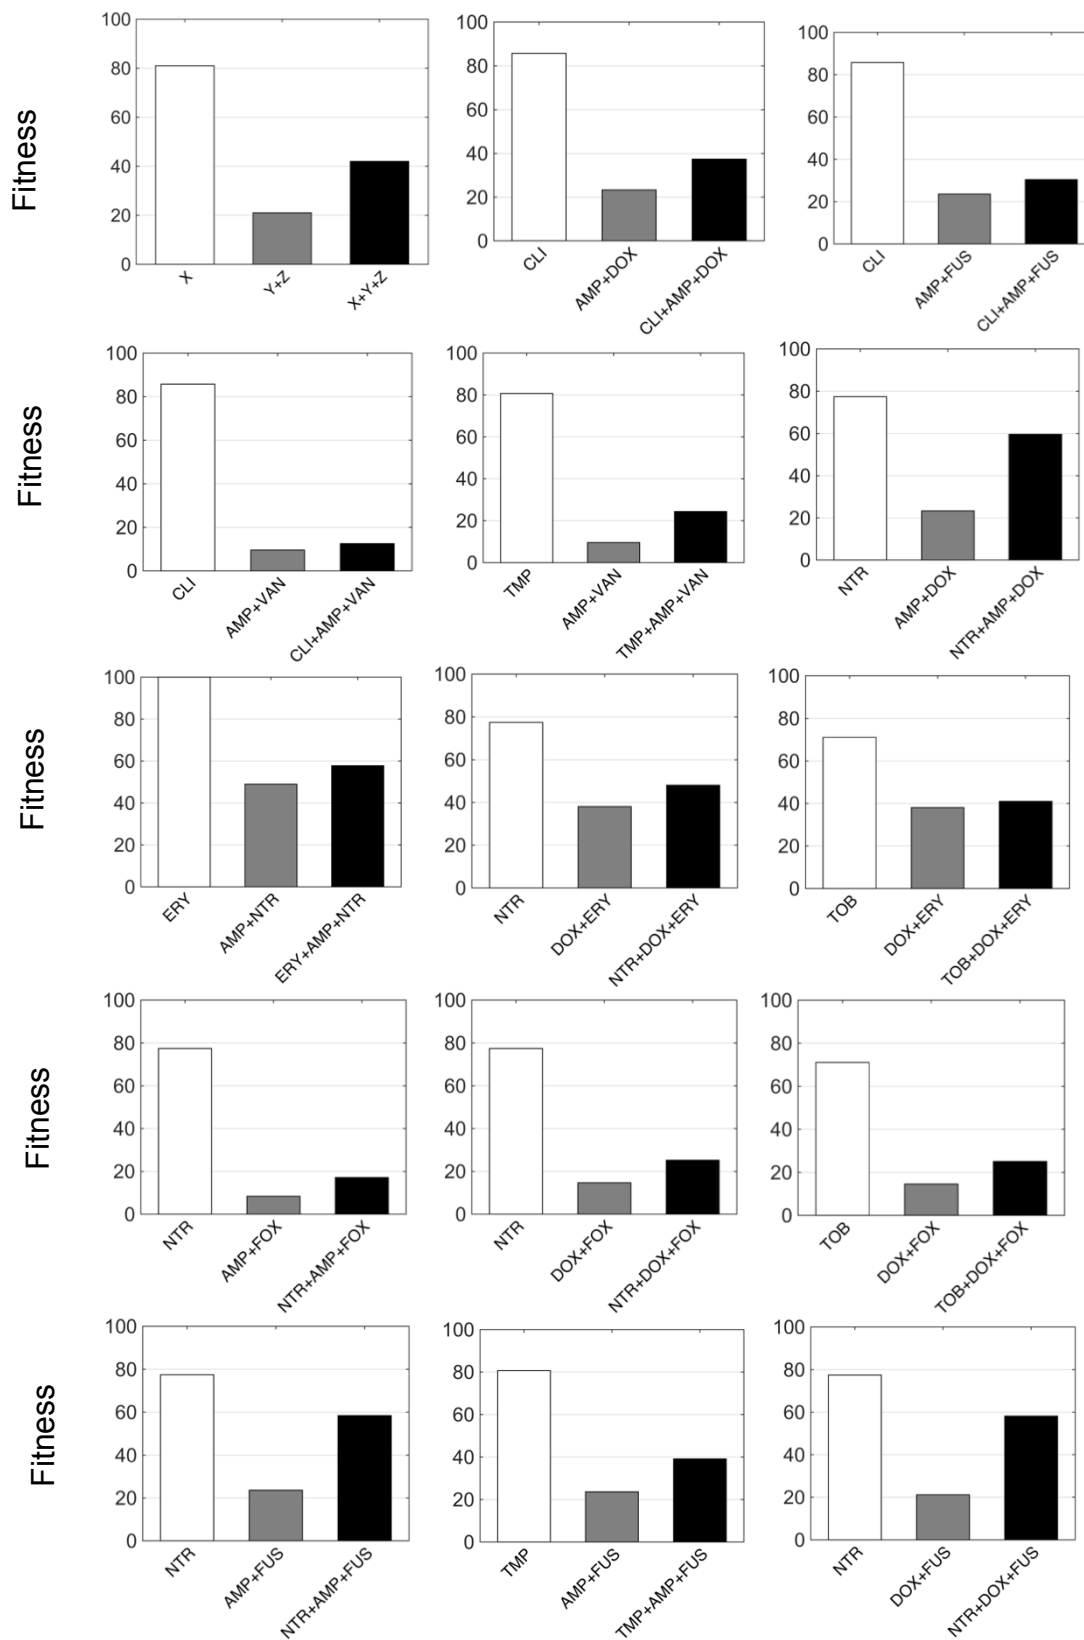

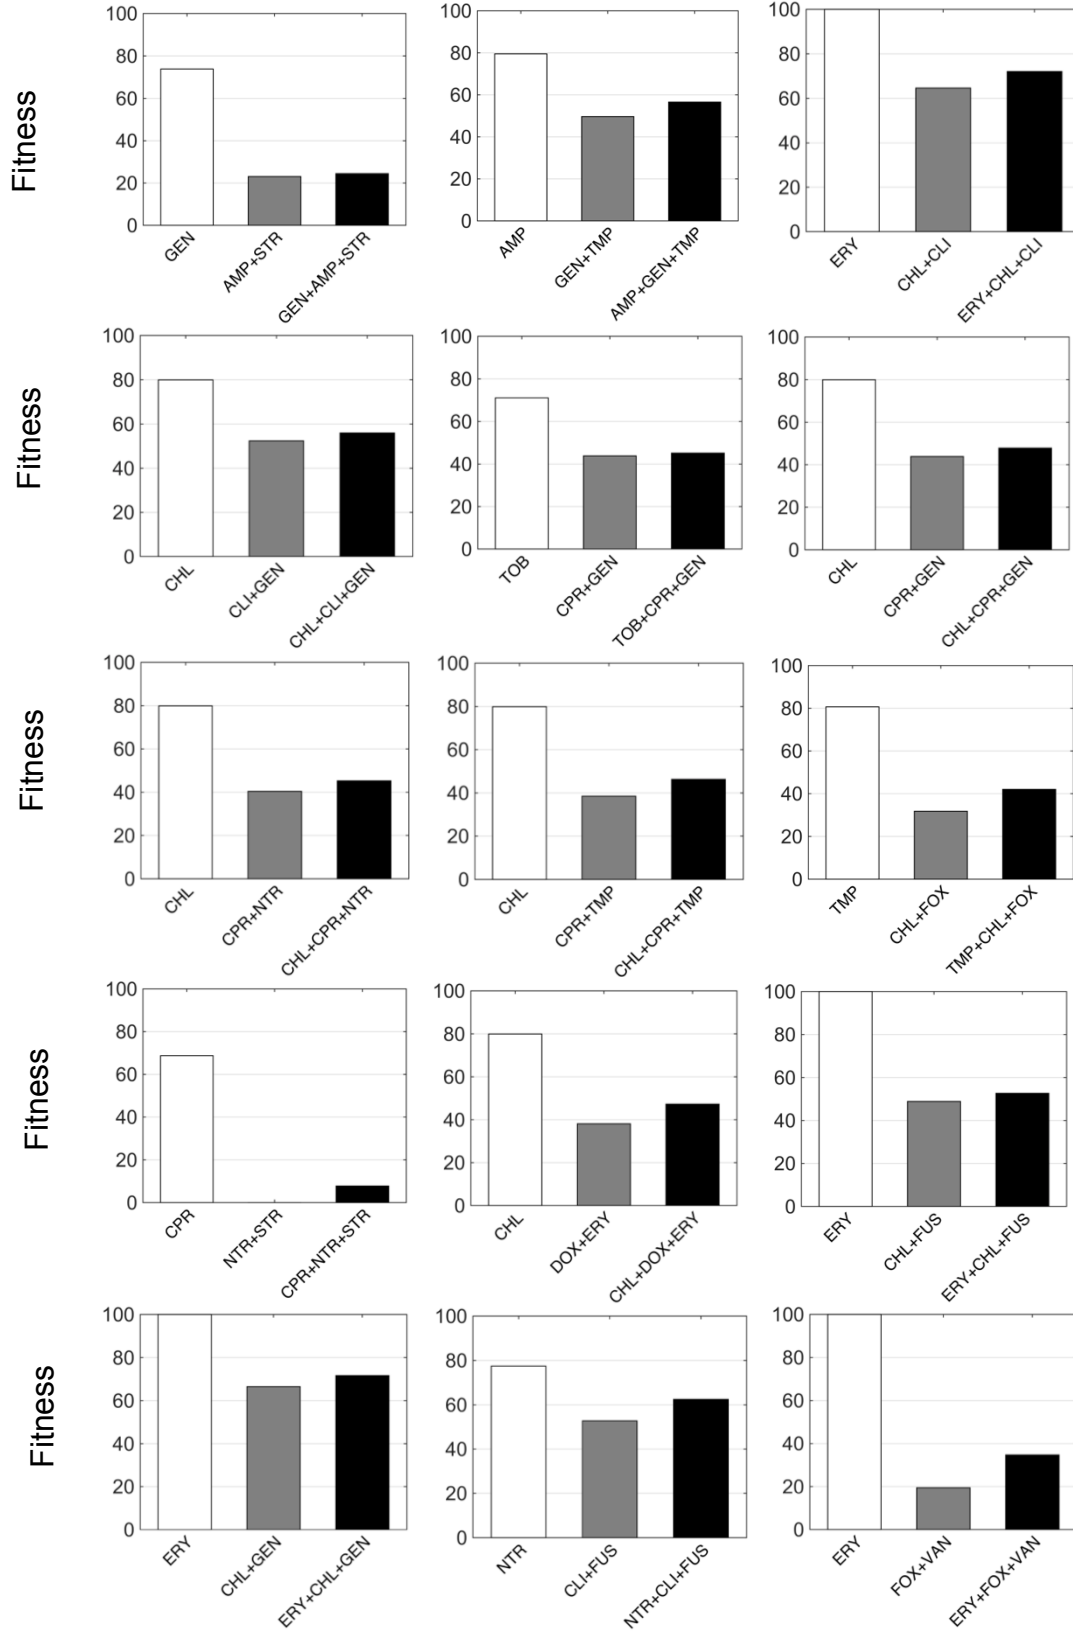



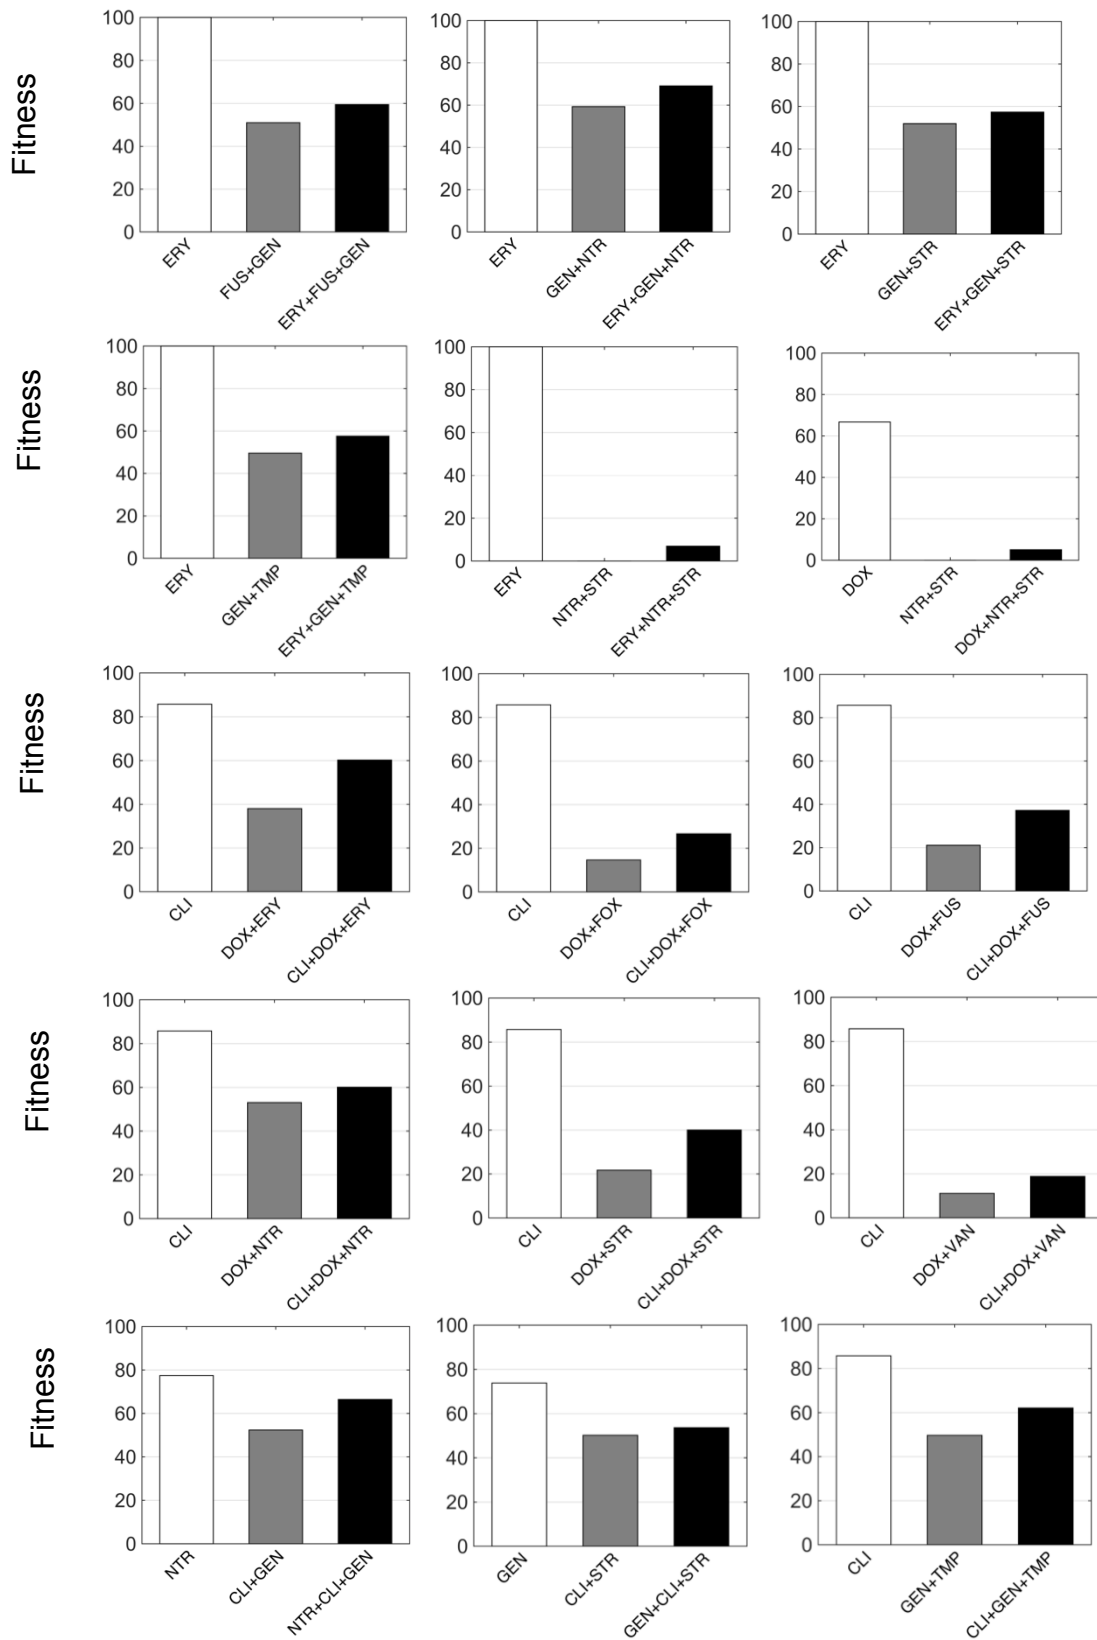

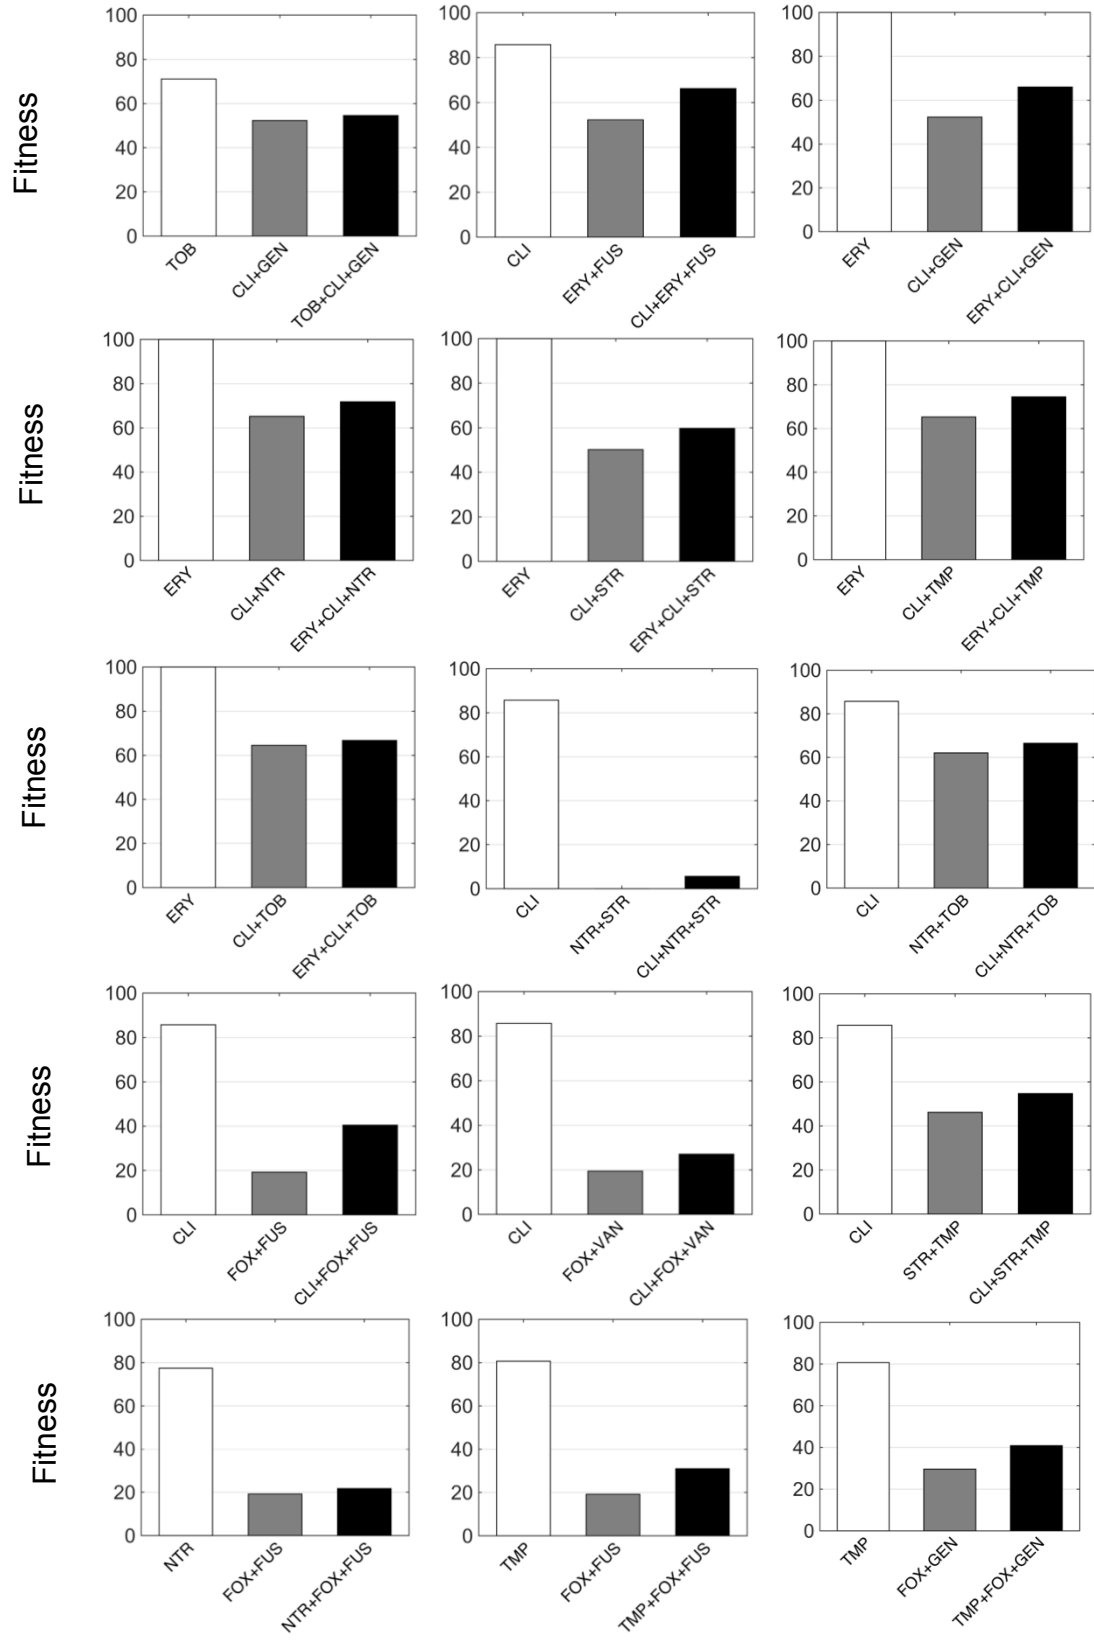

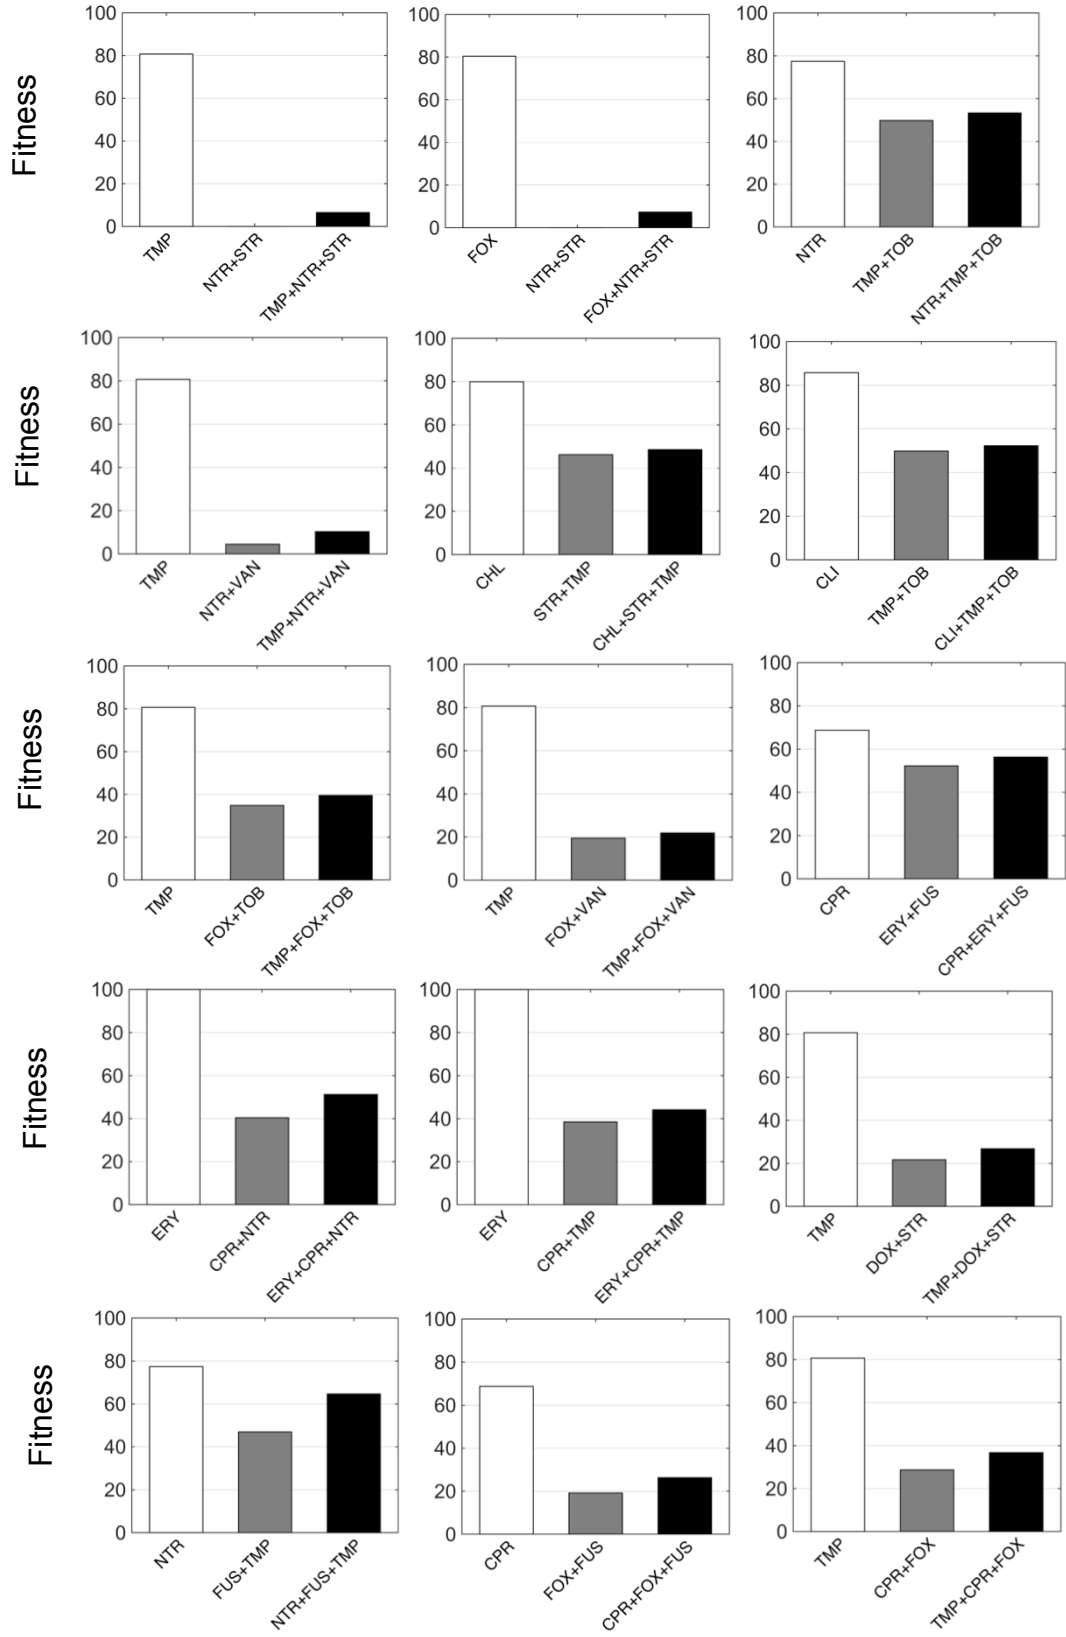

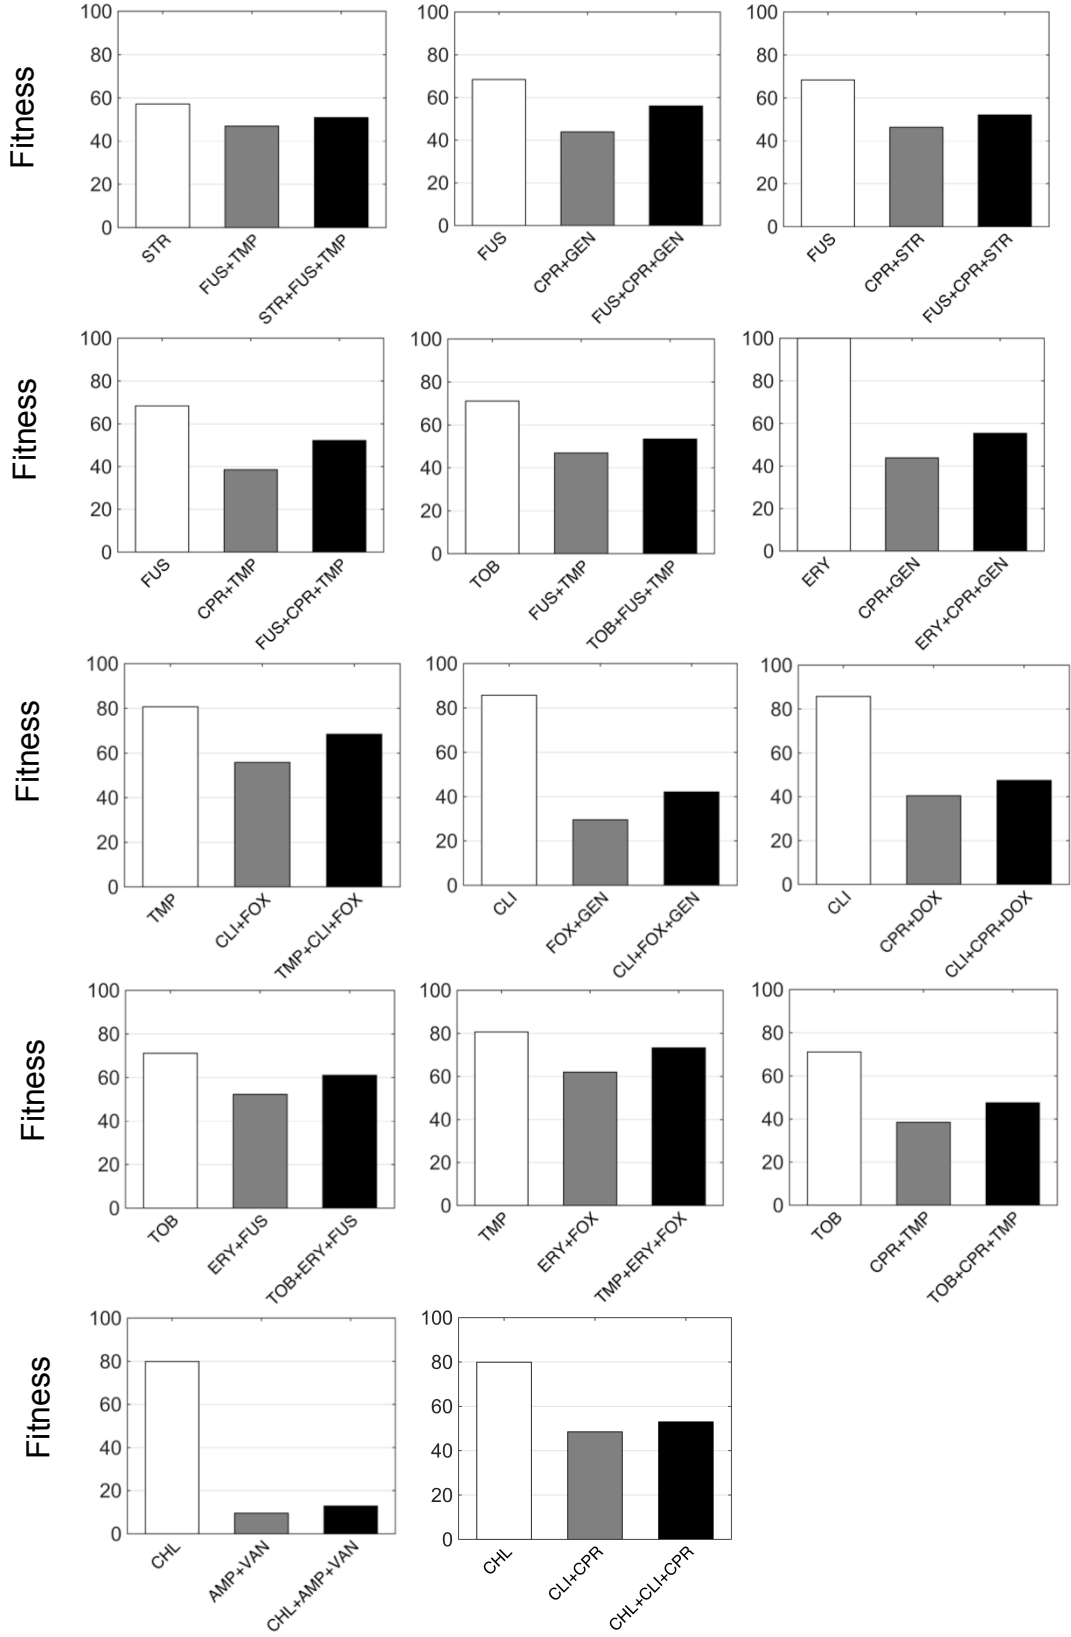

**Supplementary Figure 5. Suppressor and suppressee antibiotics for *S. epidermidis* 14990 and *E. coli* CFT07.** For each antibiotic, the number of suppressive interactions in *S. epidermidis* 14990 (above,  $R=-0.115$ ,  $N=14$ , one-tailed  $p$ -value=0.347) and *E. coli* CFT07 (below,  $R=-0.275$ ,  $N=14$ , one-tailed  $p$ -value=0.171) in which it acts as the suppressor (x axis) and the suppressee (y axis) are plotted. Antibiotic abbreviations are as listed in Table 1.

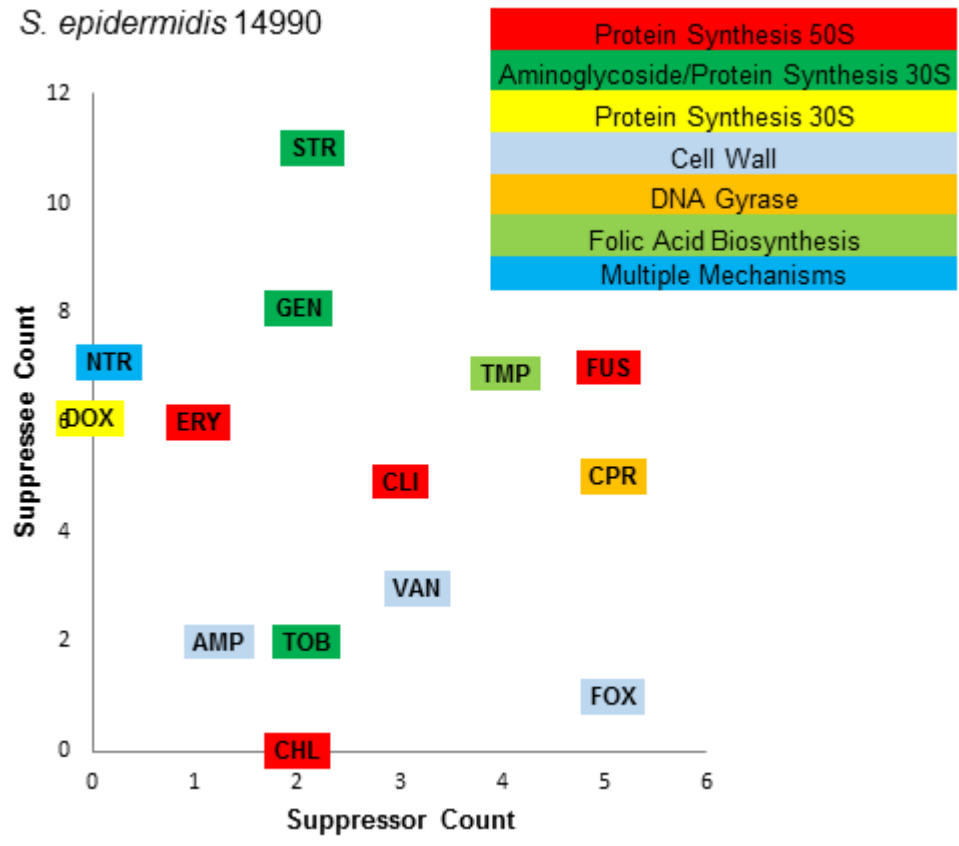

*E. coli* CFT073

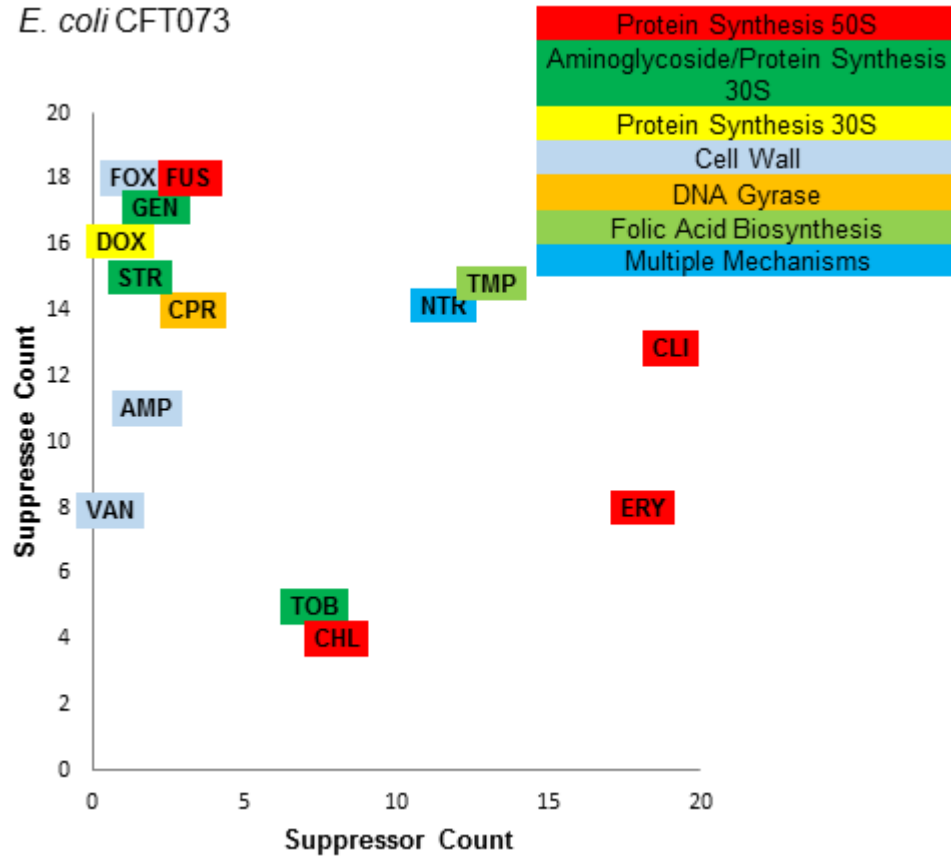

**Supplementary Table 1.** Full data set for 14 drugs in *E. coli* BW25113, *S. epidermidis* 14990, and *E. coli* CFT073. Growth percentages (median, maximum, and minimum) as compared to the no-drug control (100% growth) are given for the three single-drug, the three two-drug, and the triple combination. For *E. coli* BW25113 concentrations are listed in  $\mu\text{g/mL}$  and for *S. epidermidis* 14990 and *E. coli* CFT073 concentrations are listed in  $\mu\text{M}$ . For *E. coli* BW25113, n represents the number of independent experiments, each with 4-6 samples per experiment. For *E. coli* CFT073 and *S. epidermidis* 14990, all combinations were tested in exactly 2 independent experiments, and n represents the number of total samples over 2 experiments. Abbreviations are as listed in Table 1.

| <i>E. coli</i> BW25113    |      |       |       |       |      |       |      |
|---------------------------|------|-------|-------|-------|------|-------|------|
| Combinations              | X    | Y     | Z     | XY    | XZ   | YZ    | XYZ  |
| CLI 31.5+CPR 13+ERY 14    |      |       |       |       |      |       |      |
| Median (n=2)              | 68.9 | 87.85 | 77.65 | 49.95 | 61.2 | 75.85 | 19.6 |
| Max                       | 72.5 | 88.4  | 77.8  | 76.3  | 62.8 | 76.3  | 27   |
| Min                       | 65.3 | 87.3  | 77.5  | 23.6  | 59.6 | 75.4  | 12.2 |
| CLI 31.5+CPR 13+FOX 1.16  |      |       |       |       |      |       |      |
| Median (n=3)              | 65.3 | 88.4  | 57.4  | 29    | 18.2 | 37.6  | 14.6 |
| Max                       | 71.5 | 91.8  | 93.6  | 76.3  | 38.9 | 60.8  | 17.3 |
| Min                       | 64.3 | 63.8  | 56.3  | 26    | 14.1 | 16.3  | 9.7  |
| CPR 0.01+CLI 31.5+STR 4.5 |      |       |       |       |      |       |      |
| Median (n=5)              | 89   | 74.4  | 73.3  | 47.5  | 16.1 | 64    | 0.1  |
| Max                       | 92.1 | 77.8  | 84.2  | 64.6  | 60.2 | 66.5  | 0.3  |
| Min                       | 55.1 | 70.6  | 58.8  | 13.5  | 0.3  | 55.5  | 0    |
| CPR 0.01+CLI 31.5+TOB 1.3 |      |       |       |       |      |       |      |
| Median (n=5)              | 91.1 | 76.9  | 68    | 63.4  | 5.7  | 69.7  | 11.8 |
| Max                       | 92.4 | 78.9  | 73.5  | 64.6  | 22.9 | 76.6  | 48.4 |
| Min                       | 55.1 | 70.6  | 59.7  | 13.5  | 0.3  | 65.7  | 0.1  |



|                           |       |       |       |       |       |       |       |
|---------------------------|-------|-------|-------|-------|-------|-------|-------|
| CLI 31.5+ERY 14+FOX 1.16  |       |       |       |       |       |       |       |
| Median (n=4)              | 64.5  | 79.65 | 83.15 | 64.35 | 30.95 | 54.95 | 24.15 |
| Max                       | 82.5  | 82    | 94.6  | 73.5  | 38.3  | 65.1  | 35.3  |
| Min                       | 59    | 73.3  | 70.9  | 60.7  | 18.9  | 37    | 20.4  |
| CLI 31.5+ERY 14+STR 4.5   |       |       |       |       |       |       |       |
| Median (n=2)              | 68.9  | 77.65 | 55.15 | 61.2  | 58.45 | 66.45 | 54.45 |
| Max                       | 72.5  | 77.8  | 55.2  | 62.8  | 61.8  | 72.4  | 57.7  |
| Min                       | 65.3  | 77.5  | 55.1  | 59.6  | 55.1  | 60.5  | 51.2  |
| CLI 31.5+ERY 14+TOB 1.3   |       |       |       |       |       |       |       |
| Median (n=4)              | 70.65 | 77.65 | 93.35 | 61.8  | 66.55 | 74.65 | 63.35 |
| Max                       | 74.5  | 83.1  | 94.5  | 70.5  | 73.8  | 81.7  | 70.1  |
| Min                       | 65.3  | 77.3  | 80.9  | 59.6  | 66.1  | 73.6  | 60    |
| CLI 31.5+FOX 1.16+STR 4.5 |       |       |       |       |       |       |       |
| Median (n=6)              | 70.95 | 80.7  | 69.6  | 39.15 | 58.2  | 20.45 | 37.5  |
| Max                       | 76.9  | 93.6  | 92.8  | 44.5  | 66.5  | 29    | 41.3  |
| Min                       | 61.5  | 57.4  | 51.4  | 14.1  | 47.6  | 0.7   | 0.9   |
| CLI 31.5+FOX 1.16+TOB 1.3 |       |       |       |       |       |       |       |
| Median (n=4)              | 68.4  | 69.85 | 86.9  | 28.55 | 65.95 | 18.05 | 39.5  |
| Max                       | 74.5  | 93.6  | 93.7  | 48.7  | 73.8  | 46.9  | 55.6  |

|                           |       |       |      |       |      |       |       |
|---------------------------|-------|-------|------|-------|------|-------|-------|
| Min                       | 64.3  | 56.3  | 67.3 | 14.1  | 46   | 14    | 18.7  |
| CLI 31.5+STR 4.5+TOB 1.3  |       |       |      |       |      |       |       |
| Median (n=7)              | 73.1  | 75.2  | 68.9 | 61.3  | 72.1 | 0.7   | 0.8   |
| Max                       | 76.9  | 92.8  | 93.7 | 66.5  | 75   | 2.5   | 13    |
| Min                       | 61.5  | 39.9  | 65   | 48.9  | 61.5 | 0     | 0.1   |
| CPR 0.01+ERY 14+FOX 1.16  |       |       |      |       |      |       |       |
| Median (n=2)              | 92.05 | 80.35 | 81.1 | 81.95 | 53.9 | 46.7  | 37.95 |
| Max                       | 92.4  | 82.2  | 82.6 | 84.3  | 55.7 | 52.2  | 42.2  |
| Min                       | 91.7  | 78.5  | 79.6 | 79.6  | 52.1 | 41.2  | 33.7  |
| CPR 0.01+ERY 14+STR 4.5   |       |       |      |       |      |       |       |
| Median (n=4)              | 90.05 | 82.05 | 74.6 | 78.7  | 28.9 | 70.75 | 62.4  |
| Max                       | 92.1  | 85.5  | 84.2 | 79.9  | 60.2 | 76.9  | 77.8  |
| Min                       | 88    | 79.6  | 65.9 | 74.5  | 15.3 | 68.7  | 55.5  |
| CPR 0.01+ERY 14+TOB 1.3   |       |       |      |       |      |       |       |
| Median (n=4)              | 90.05 | 81.1  | 67.2 | 78.95 | 6.6  | 76.1  | 63.3  |
| Max                       | 92.4  | 85.5  | 73.5 | 79.9  | 22.9 | 77.5  | 67.6  |
| Min                       | 88    | 78.5  | 65   | 74.5  | 0.3  | 71.8  | 60.2  |
| CPR 0.01+FOX 1.16+STR 4.5 |       |       |      |       |      |       |       |
| Median (n=3)              | 91.1  | 79    | 73.3 | 62.3  | 41.7 | 25.3  | 28.6  |

|                           |       |      |      |       |      |       |       |
|---------------------------|-------|------|------|-------|------|-------|-------|
| Max                       | 92.1  | 82.4 | 84.2 | 83.2  | 60.2 | 29    | 36.9  |
| Min                       | 88    | 78.9 | 65.9 | 61.6  | 16.1 | 23.2  | 10.8  |
| CPR 0.01+FOX 1.16+TOB 1.3 |       |      |      |       |      |       |       |
| Median (n=3)              | 91.1  | 82.4 | 68.9 | 62.3  | 5.7  | 44.8  | 20.1  |
| Max                       | 92.4  | 82.6 | 73.5 | 83.2  | 22.9 | 46.8  | 39.7  |
| Min                       | 88    | 79   | 65   | 55.7  | 0.3  | 36.6  | 0.4   |
| CPR 0.01+STR 4.5+TOB 1.3  |       |      |      |       |      |       |       |
| Median (n=3)              | 89    | 73.3 | 65.5 | 16.1  | 7.5  | 0     | 0     |
| Max                       | 91.1  | 75.9 | 68.9 | 41.7  | 22.9 | 2.5   | 0     |
| Min                       | 88    | 65.9 | 65   | 15.3  | 5.7  | 0     | 0     |
| ERY 14+FOX 1.16+STR 4.5   |       |      |      |       |      |       |       |
| Median (n=4)              | 80.55 | 80.7 | 69.6 | 52.85 | 70.1 | 24.25 | 47.95 |
| Max                       | 85.5  | 93.6 | 84.2 | 54.4  | 76.9 | 29    | 51.4  |
| Min                       | 77.5  | 78.9 | 55.1 | 33.7  | 60.5 | 7.9   | 41.1  |
| ERY 14+FOX 1.16+TOB 1.3   |       |      |      |       |      |       |       |
| Median (n=2)              | 79.65 | 90.3 | 96.3 | 59.95 | 78.3 | 17.15 | 56.8  |
| Max                       | 82    | 94.6 | 99.6 | 65.1  | 81.4 | 17.6  | 62.8  |
| Min                       | 77.3  | 86   | 93   | 54.8  | 75.2 | 16.7  | 50.8  |
| ERY 14+STR 4.5+TOB 1.3    |       |      |      |       |      |       |       |

|                          |        |        |        |        |       |       |        |
|--------------------------|--------|--------|--------|--------|-------|-------|--------|
| Median (n=9)             | 82.3   | 75.2   | 68.9   | 71.5   | 75.6  | 0.8   | 1.5    |
| Max                      | 87.9   | 92.8   | 93.7   | 76.9   | 81.7  | 78.9  | 65.4   |
| Min                      | 75.6   | 39.9   | 59.7   | 33.2   | 69.9  | 0     | 0.3    |
| FOX 1.16+STR 4.5+TOB 1.3 |        |        |        |        |       |       |        |
| Median (n=6)             | 80.25  | 74.25  | 85.05  | 12.8   | 39.45 | 0.65  | 0.3    |
| Max                      | 93.6   | 92.8   | 93.7   | 29     | 57.1  | 50.8  | 11.4   |
| Min                      | 57.4   | 51.4   | 65     | 0.4    | 14    | 0     | 0      |
| AMP 1.0+CPR 10+CLI 17.5  |        |        |        |        |       |       |        |
| Median (n=7)             | 79.14  | 68.46  | 69.81  | 40.38  | 45.34 | 37.61 | 16.71  |
| Max                      | 88.16  | 78.77  | 80.74  | 53.99  | 59.79 | 49.41 | 28.5   |
| Min                      | 70.43  | 63.98  | 63.82  | 20.97  | 26.86 | 0.83  | 6.75   |
| AMP 0.9+CPR 10+ERY 18    |        |        |        |        |       |       |        |
| Median (n=2)             | 77.45  | 77.595 | 82.485 | 43.405 | 80.23 | 69.24 | 55.545 |
| Max                      | 87.31  | 84.65  | 83.57  | 45.61  | 82.76 | 75.1  | 60.21  |
| Min                      | 67.59  | 70.54  | 81.4   | 41.2   | 77.7  | 63.38 | 50.88  |
| AMP 0.9+CPR 10+FOX 1     |        |        |        |        |       |       |        |
| Median (n=4)             | 77.595 | 78.93  | 65.39  | 51.155 | 33.71 | 30.96 | 10.37  |
| Max                      | 84.39  | 79.76  | 84.73  | 67.75  | 45.65 | 44.74 | 24.68  |
| Min                      | 70.43  | 69.94  | 58.81  | 34.48  | 18.96 | 21.12 | 7.89   |

|                          |       |        |        |       |       |       |       |
|--------------------------|-------|--------|--------|-------|-------|-------|-------|
| AMP 1.0+CPR 10+NTR 1     |       |        |        |       |       |       |       |
| Median (n=4)             | 89.11 | 68.195 | 78.715 | 61.67 | 36.79 | 66.12 | 49.27 |
| Max                      | 89.98 | 79.19  | 84.25  | 93.41 | 58.17 | 74.92 | 61.61 |
| Min                      | 84.43 | 57.61  | 50.51  | 47.47 | 35.22 | 56.34 | 37.35 |
| AMP 0.9+CPR 10+STR 2.3   |       |        |        |       |       |       |       |
| Median (n=5)             | 87.52 | 78.7   | 77.73  | 43.25 | 42.2  | 45.36 | 1.44  |
| Max                      | 91.62 | 91.4   | 86.99  | 65.59 | 77.4  | 74.82 | 23.06 |
| Min                      | 65.04 | 72.26  | 61.37  | 34.9  | 23.49 | 19.52 | 1.04  |
| AMP 0.9+CPR 10+TOB 0.8   |       |        |        |       |       |       |       |
| Median (n=3)             | 88.27 | 87.43  | 73.07  | 46.27 | 48.86 | 46.05 | 0.98  |
| Max                      | 88.85 | 88.53  | 76.03  | 50.88 | 52.29 | 68.52 | 11.37 |
| Min                      | 82.57 | 72.26  | 72.42  | 39.97 | 48.78 | 1.08  | 0.88  |
| AMP 1.0+STR 2.3+CLI 17.5 |       |        |        |       |       |       |       |
| Median (n=3)             | 75.08 | 73.71  | 69.81  | 60.1  | 38.01 | 59.59 | 23.93 |
| Max                      | 88.16 | 79.72  | 72.36  | 61.77 | 45.34 | 65.07 | 29.51 |
| Min                      | 70.43 | 67.41  | 63.82  | 46.93 | 26.86 | 58.45 | 8.61  |
| AMP 1.0+STR 2.3+ERY 18   |       |        |        |       |       |       |       |
| Median (n=3)             | 80.82 | 79.7   | 76.91  | 49.74 | 87.8  | 76.6  | 58.98 |
| Max                      | 88.2  | 80.54  | 87.33  | 60.1  | 89.6  | 90.22 | 62.2  |

|                         |        |        |        |        |        |        |        |
|-------------------------|--------|--------|--------|--------|--------|--------|--------|
| Min                     | 75.08  | 67.41  | 76.9   | 46.93  | 62.75  | 70.7   | 47.78  |
| AMP 0.9+STR 2.3+FOX 1   |        |        |        |        |        |        |        |
| Median (n=4)            | 76.075 | 74.28  | 76.165 | 45.09  | 33.13  | 33.795 | 15.435 |
| Max                     | 87.31  | 88.78  | 84.73  | 70.15  | 45.65  | 69.87  | 26.23  |
| Min                     | 67.59  | 73.71  | 65.59  | 19.75  | 24.34  | 22.46  | 4.52   |
| AMP 1.1+STR 2.3+NTR 1   |        |        |        |        |        |        |        |
| Median (n=4)            | 88.5   | 76.485 | 84.29  | 61.67  | 52.295 | 30.63  | 6.73   |
| Max                     | 92.54  | 86.16  | 86.58  | 71.52  | 66.11  | 61.39  | 7.09   |
| Min                     | 84.43  | 64.41  | 74.72  | 48.89  | 46.78  | 16.45  | 0.82   |
| AMP 0.9+STR 2.3+TOB 0.8 |        |        |        |        |        |        |        |
| Median (n=3)            | 88.85  | 77.54  | 74.31  | 42.57  | 51.47  | 12.71  | 0.46   |
| Max                     | 90.4   | 77.73  | 76.03  | 43.01  | 52.29  | 18.8   | 0.97   |
| Min                     | 82.57  | 76.25  | 72.42  | 25.13  | 48.86  | 7.72   | 0.41   |
| AMP 1.0+ERY 18+CLI 17.5 |        |        |        |        |        |        |        |
| Median (n=4)            | 79.98  | 75.34  | 69.165 | 63.835 | 52.975 | 75.09  | 48.815 |
| Max                     | 86.93  | 87.33  | 80.28  | 87.8   | 59.79  | 84.72  | 55.67  |
| Min                     | 75.08  | 68.55  | 63.82  | 52.46  | 45.34  | 68.28  | 33.42  |
| AMP 1.0+ERY 18+FOX 1    |        |        |        |        |        |        |        |
| Median (n=2)            | 86.535 | 66.11  | 67.455 | 67.04  | 31.44  | 41.57  | 21.61  |

|                        |       |       |       |        |       |       |        |
|------------------------|-------|-------|-------|--------|-------|-------|--------|
| Max                    | 86.93 | 73.77 | 71.25 | 69.16  | 35.8  | 42.43 | 25.25  |
| Min                    | 86.14 | 58.45 | 63.66 | 64.92  | 27.08 | 40.71 | 17.97  |
| AMP 1.1+ERY 18+NTR 1   |       |       |       |        |       |       |        |
| Median (n=5)           | 89.78 | 79.19 | 76.04 | 66.88  | 69.64 | 57.99 | 53.01  |
| Max                    | 92.54 | 86.16 | 81.69 | 93.41  | 76.34 | 67.92 | 62.68  |
| Min                    | 84.43 | 64.41 | 61.76 | 48.89  | 48.01 | 56.99 | 34.96  |
| AMP 1.0+ERY 18+TOB 0.8 |       |       |       |        |       |       |        |
| Median (n=2)           | 77.95 | 82.12 | 63.3  | 75.275 | 20.99 | 76.11 | 55.835 |
| Max                    | 80.82 | 87.33 | 63.76 | 87.8   | 40.98 | 86.63 | 66.88  |
| Min                    | 75.08 | 76.91 | 62.84 | 62.75  | 1     | 65.59 | 44.79  |
| AMP 1.0+NTR 1+CLI 17.5 |       |       |       |        |       |       |        |
| Median (n=3)           | 86.46 | 75.51 | 74.29 | 42.85  | 60.94 | 55.58 | 40.49  |
| Max                    | 89.98 | 79.19 | 77.25 | 93.41  | 62.13 | 65.63 | 52.99  |
| Min                    | 86.26 | 64.23 | 62.15 | 36.02  | 58.5  | 55.5  | 34.96  |
| AMP 1.1+NTR 1+FOX 0.9  |       |       |       |        |       |       |        |
| Median (n=3)           | 86.46 | 69.32 | 66.82 | 62.13  | 38.31 | 66.89 | 36.91  |
| Max                    | 88.77 | 74.36 | 89.07 | 81.59  | 40.48 | 68.01 | 39.77  |
| Min                    | 86.02 | 62.15 | 53.55 | 60.76  | 34.87 | 65.83 | 29.5   |
| AMP 1.0+NTR 1+TOB 0.8  |       |       |       |        |       |       |        |

|                          |       |       |        |        |       |        |       |
|--------------------------|-------|-------|--------|--------|-------|--------|-------|
| Median (n=3)             | 89.98 | 79.19 | 59.61  | 66.88  | 19.95 | 1      | 1.15  |
| Max                      | 92.54 | 80.99 | 87.32  | 93.41  | 27.32 | 1.53   | 1.67  |
| Min                      | 84.43 | 64.41 | 55.39  | 48.89  | 1.28  | 0.98   | 1     |
| AMP 1.1+CLI 17.5+FOX 0.9 |       |       |        |        |       |        |       |
| Median (n=2)             | 86.36 | 69.87 | 65.115 | 39.435 | 38.05 | 32.945 | 19.97 |
| Max                      | 86.46 | 75.51 | 76.68  | 42.85  | 38.31 | 34.87  | 20.58 |
| Min                      | 86.26 | 64.23 | 53.55  | 36.02  | 37.79 | 31.02  | 19.36 |
| AMP 1.0+CLI 17.5+TOB 0.8 |       |       |        |        |       |        |       |
| Median (n=5)             | 80.82 | 69.04 | 63.76  | 45.34  | 13.28 | 68.82  | 11.9  |
| Max                      | 86.93 | 80.58 | 79.11  | 59.79  | 53.57 | 76.62  | 41.13 |
| Min                      | 75.08 | 63.82 | 55.19  | 32.02  | 0.95  | 49.36  | 1.54  |
| AMP 1.0+FOX 1+TOB 0.8    |       |       |        |        |       |        |       |
| Median (n=3)             | 86.14 | 71.25 | 72.5   | 27.08  | 13.28 | 38.2   | 0.71  |
| Max                      | 86.93 | 80.11 | 73.4   | 35.8   | 64.2  | 52.23  | 0.91  |
| Min                      | 75.47 | 63.66 | 55.19  | 27.05  | 0.95  | 32.03  | 0.55  |
| NTR 1+CPR 10+CLI 17.5    |       |       |        |        |       |        |       |
| Median (n=3)             | 71.22 | 75.23 | 74.35  | 65.24  | 66.03 | 38.25  | 46.62 |
| Max                      | 74.24 | 76.28 | 74.62  | 84.28  | 66.83 | 40.73  | 46.91 |
| Min                      | 65.43 | 71.66 | 72.6   | 53.14  | 63.54 | 36.67  | 39.32 |



|                              |        |        |        |        |        |        |       |
|------------------------------|--------|--------|--------|--------|--------|--------|-------|
| <b>NTR 1+CPR 10+ERY 18</b>   |        |        |        |        |        |        |       |
| Median (n=4)                 | 80.08  | 68.165 | 79.69  | 63.265 | 65.53  | 62.395 | 57.71 |
| Max                          | 91.5   | 80.06  | 89.1   | 87.57  | 77.9   | 81.44  | 72.43 |
| Min                          | 71.98  | 59.86  | 61.76  | 56.34  | 57.99  | 43.91  | 50.32 |
| <b>NTR 1+CPR 10+FOX 0.9</b>  |        |        |        |        |        |        |       |
| Median (n=4)                 | 67.465 | 69.02  | 75.28  | 54.395 | 65.995 | 14.81  | 59.95 |
| Max                          | 83.55  | 87.08  | 77.8   | 89.35  | 81.75  | 59.49  | 61.7  |
| Min                          | 54.68  | 61.23  | 63.46  | 50.83  | 35.14  | 8.9    | 56.08 |
| <b>NTR 1+CPR 10+STR 2.3</b>  |        |        |        |        |        |        |       |
| Median (n=5)                 | 74     | 62.27  | 79.45  | 70.41  | 22.46  | 1.24   | 0.76  |
| Max                          | 91.5   | 80.06  | 89.14  | 87.57  | 50.41  | 27.19  | 9.58  |
| Min                          | 71.98  | 59.86  | 73.19  | 56.34  | 5.24   | 0.02   | 0.15  |
| <b>NTR 1+CPR 9+TOB 0.6</b>   |        |        |        |        |        |        |       |
| Median (n=4)                 | 78.485 | 68.135 | 74.975 | 68.115 | 8.18   | 1.28   | 2.82  |
| Max                          | 83.52  | 75.3   | 81.25  | 92.19  | 25.69  | 12.42  | 8.6   |
| Min                          | 60.7   | 62.27  | 65.42  | 58.61  | 0.09   | 0.23   | 0.12  |
| <b>NTR 1+CLI 17.5+ERY 18</b> |        |        |        |        |        |        |       |
| Median (n=3)                 | 71.22  | 71.66  | 88.79  | 53.14  | 67.31  | 71.27  | 53.22 |
| Max                          | 71.3   | 75.22  | 92.45  | 65.23  | 67.48  | 81.03  | 59.66 |

|                        |        |        |        |       |        |       |        |
|------------------------|--------|--------|--------|-------|--------|-------|--------|
| Min                    | 65.43  | 66.01  | 69.03  | 52.88 | 49.92  | 62.62 | 40.82  |
| NTR 1+CLI 17.5+FOX 0.9 |        |        |        |       |        |       |        |
| Median (n=3)           | 69.32  | 72.8   | 66.91  | 65.83 | 43.85  | 36.65 | 40.9   |
| Max                    | 83.55  | 77.8   | 68.67  | 81.75 | 57.5   | 41.34 | 42.54  |
| Min                    | 65.94  | 66.82  | 37.33  | 35.14 | 38.25  | 31.82 | 39.92  |
| NTR 1+CLI 17.5+STR 2.3 |        |        |        |       |        |       |        |
| Median (n=4)           | 68.325 | 68.835 | 73.2   | 53.01 | 34.155 | 55.05 | 6      |
| Max                    | 71.3   | 75.22  | 84.75  | 65.23 | 39.09  | 70.33 | 10.67  |
| Min                    | 61.25  | 65.14  | 62.96  | 52.81 | 4.57   | 44.37 | 0.88   |
| NTR 1+CLI 17.5+TOB 0.6 |        |        |        |       |        |       |        |
| Median (n=3)           | 82.97  | 75.79  | 79.15  | 58.11 | 25.69  | 60.9  | 36.09  |
| Max                    | 83.52  | 78.09  | 81.25  | 64.87 | 31.6   | 67.18 | 45.96  |
| Min                    | 60.7   | 71.06  | 65.92  | 45.41 | 16.18  | 41.51 | 30.73  |
| NTR 1+ERY 18+FOX 0.9   |        |        |        |       |        |       |        |
| Median (n=6)           | 72.19  | 72.42  | 76.815 | 69.59 | 57.68  | 47.55 | 48.325 |
| Max                    | 92.9   | 95.65  | 90.13  | 87.56 | 88.84  | 67.23 | 59.37  |
| Min                    | 59.63  | 51.89  | 67.6   | 0.5   | 45.18  | 37.88 | 28.01  |
| NTR 1+ERY 18+STR 2.3   |        |        |        |       |        |       |        |
| Median (n=3)           | 71.98  | 79.02  | 74.72  | 60.65 | 66.84  | 22.43 | 44.44  |

|                          |       |       |       |       |       |       |       |
|--------------------------|-------|-------|-------|-------|-------|-------|-------|
| Max                      | 74    | 81.69 | 79.45 | 63.27 | 69.54 | 38.8  | 45.64 |
| Min                      | 64.12 | 77.69 | 69.13 | 57.99 | 66.75 | 5.7   | 0.97  |
| NTR 1+ERY 18+TOB 0.8     |       |       |       |       |       |       |       |
| Median (n=5)             | 74    | 80.42 | 71.34 | 67.94 | 3.78  | 73.54 | 52.84 |
| Max                      | 92.9  | 90.13 | 92    | 88.84 | 31.45 | 99.94 | 69.08 |
| Min                      | 71.99 | 73.21 | 57.77 | 60.55 | 0.09  | 67.51 | 33.17 |
| NTR 1+FOX 0.9+STR 2.3    |       |       |       |       |       |       |       |
| Median (n=3)             | 69.32 | 72.8  | 67.78 | 65.83 | 13.34 | 42.95 | 4.62  |
| Max                      | 74.36 | 89.07 | 82.42 | 66.89 | 20.75 | 46.77 | 21.26 |
| Min                      | 65.94 | 66.82 | 64.39 | 35.14 | 8.99  | 41.66 | 1.3   |
| NTR 1+FOX 0.9+TOB 0.6    |       |       |       |       |       |       |       |
| Median (n=3)             | 82.97 | 73.36 | 79.15 | 69.35 | 16.18 | 43.55 | 1.27  |
| Max                      | 83.52 | 78.23 | 81.25 | 77.64 | 25.69 | 54.67 | 17.93 |
| Min                      | 75.23 | 59.8  | 66.21 | 63.64 | 1.48  | 38.29 | 1.24  |
| NTR 1+STR 2.3+TOB 0.8    |       |       |       |       |       |       |       |
| Median (n=3)             | 74    | 79.45 | 70.8  | 22.43 | 0.85  | 1.2   | 0.64  |
| Max                      | 91.5  | 89.14 | 92    | 50.41 | 3.78  | 1.79  | 0.72  |
| Min                      | 64.12 | 69.13 | 59.24 | 5.7   | 0.09  | 0.8   | 0.45  |
| GEN 0.4+TMP 0.07+AMP 1.2 |       |       |       |       |       |       |       |

|                          |        |       |        |        |        |       |       |
|--------------------------|--------|-------|--------|--------|--------|-------|-------|
| Median (n=4)             | 74.195 | 57.82 | 74.585 | 24.635 | 29.315 | 0.53  | 0.675 |
| Max                      | 79.85  | 62.85 | 84     | 27.47  | 34.57  | 2.21  | 1.02  |
| Min                      | 69.55  | 53.99 | 66.66  | 22.38  | 22.38  | 0.43  | 0.38  |
| GEN 0.4+TMP 0.1+CPR 0.01 |        |       |        |        |        |       |       |
| Median (n=3)             | 73.74  | 87.29 | 78.21  | 51.36  | 65.4   | 51.4  | 4.32  |
| Max                      | 74.17  | 88.09 | 85.25  | 56.01  | 65.72  | 54.09 | 15.75 |
| Min                      | 69.64  | 85.33 | 71.4   | 48.34  | 59.34  | 51.2  | 1.55  |
| GEN 0.4+TMP 0.1+CLI 20   |        |       |        |        |        |       |       |
| Median (n=3)             | 73.74  | 87.29 | 74.96  | 51.36  | 69.53  | 38.25 | 38.46 |
| Max                      | 74.17  | 88.09 | 80.7   | 56.01  | 73.41  | 41.04 | 39.48 |
| Min                      | 69.64  | 85.33 | 70.01  | 48.34  | 68.22  | 37.9  | 36.33 |
| GEN 0.4+TMP 0.1+FOX 1    |        |       |        |        |        |       |       |
| Median (n=3)             | 73.74  | 87.29 | 75.95  | 51.36  | 20.7   | 58.52 | 37.32 |
| Max                      | 74.17  | 88.09 | 78.5   | 56.01  | 20.71  | 63.32 | 40.63 |
| Min                      | 69.64  | 85.33 | 70.36  | 48.34  | 18.9   | 53.13 | 22.18 |
| GEN 0.4+CHL 40+TMP 0.1   |        |       |        |        |        |       |       |
| Median (n=5)             | 76.97  | 91.51 | 57.08  | 80.89  | 7.78   | 51.61 | 34.52 |
| Max                      | 85.49  | 94.18 | 59.12  | 84.75  | 21.49  | 66.47 | 55.65 |
| Min                      | 71.76  | 83.49 | 49.15  | 68.93  | 1.25   | 45.74 | 18.39 |

|                               |       |       |       |        |       |        |       |
|-------------------------------|-------|-------|-------|--------|-------|--------|-------|
| <b>GEN 0.4+TMP 0.07+NTR 1</b> |       |       |       |        |       |        |       |
| Median (n=4)                  | 72.01 | 81.15 | 86.35 | 23.105 | 49.11 | 52.735 | 0.695 |
| Max                           | 73.29 | 84.54 | 90.25 | 32.54  | 51.69 | 63.26  | 1.3   |
| Min                           | 70.72 | 79.07 | 83.75 | 13.24  | 36.43 | 50.72  | 0.45  |
| <b>GEN 0.4+CLI 20+STR 20</b>  |       |       |       |        |       |        |       |
| Median (n=2)                  | 87.05 | 81.08 | 87.82 | 80.175 | 71.47 | 72.7   | 62.84 |
| Max                           | 88.1  | 82.85 | 87.99 | 80.93  | 75.01 | 79.67  | 68.3  |
| Min                           | 86    | 79.31 | 87.65 | 79.42  | 67.93 | 65.73  | 57.38 |
| <b>GEN 0.4+NTR 1+FOX 1</b>    |       |       |       |        |       |        |       |
| Median (n=5)                  | 77.83 | 78.73 | 77.84 | 68.06  | 54.34 | 69.87  | 67.14 |
| Max                           | 84.25 | 88.5  | 87.57 | 83.92  | 61.3  | 85.41  | 75.22 |
| Min                           | 70.13 | 64.22 | 68.66 | 59.43  | 43.13 | 60.98  | 47.42 |
| <b>GEN 0.4+TOB 0.5+FOX 1</b>  |       |       |       |        |       |        |       |
| Median (n=3)                  | 86    | 86.22 | 84.55 | 66.56  | 58.67 | 35.2   | 47.44 |
| Max                           | 88.1  | 88.96 | 91.72 | 76.44  | 75.66 | 50.41  | 69.49 |
| Min                           | 70.13 | 76.9  | 83.35 | 40.88  | 45.7  | 31.27  | 24.84 |
| <b>GEN 0.4+CLI 20+NTR 1</b>   |       |       |       |        |       |        |       |
| Median (n=3)                  | 77.16 | 75.96 | 68.35 | 72.48  | 68.06 | 57.14  | 62.43 |
| Max                           | 77.83 | 79.46 | 78.73 | 81.61  | 76.04 | 67.16  | 75.02 |

|                         |       |       |       |       |       |       |       |
|-------------------------|-------|-------|-------|-------|-------|-------|-------|
| Min                     | 70.13 | 75.11 | 64.22 | 63.52 | 59.43 | 43.05 | 61.24 |
| GEN 0.4+CLI 20+TOB 0.5  |       |       |       |       |       |       |       |
| Median (n=3)            | 86    | 79.46 | 86.22 | 79.42 | 66.56 | 74.82 | 70.52 |
| Max                     | 88.1  | 82.85 | 88.96 | 80.93 | 76.44 | 75.24 | 75.96 |
| Min                     | 70.13 | 79.31 | 76.9  | 72.48 | 40.88 | 61.52 | 51.03 |
| GEN 0.4+AMP 1.2+FOX 1   |       |       |       |       |       |       |       |
| Median (n=7)            | 80.88 | 82.49 | 75.44 | 45.83 | 44.98 | 23.27 | 16.98 |
| Max                     | 92.63 | 85.45 | 80.35 | 60.79 | 62.19 | 50.65 | 23.83 |
| Min                     | 72.42 | 74.28 | 67.16 | 29.52 | 19.43 | 16.86 | 8.23  |
| GEN 0.4+AMP 1.2+STR 1   |       |       |       |       |       |       |       |
| Median (n=3)            | 85.14 | 65.36 | 77.86 | 13.7  | 51.35 | 15.05 | 11.41 |
| Max                     | 88.44 | 72.93 | 86.3  | 13.74 | 59.86 | 26    | 19.4  |
| Min                     | 83.36 | 56.99 | 70.98 | 13.09 | 48.32 | 9.48  | 7.48  |
| GEN 0.4+AMP 1.2+TOB 0.5 |       |       |       |       |       |       |       |
| Median (n=5)            | 86.19 | 93.47 | 83.32 | 49.64 | 59.36 | 39.12 | 15.22 |
| Max                     | 91.35 | 94.94 | 90.89 | 57.53 | 73.98 | 49.56 | 20.55 |
| Min                     | 80.72 | 83.39 | 73.17 | 40.24 | 51.54 | 22.03 | 8.24  |
| GEN 0.4+AMP 1.2+NTR 1   |       |       |       |       |       |       |       |
| Median (n=5)            | 72.73 | 82.49 | 87.47 | 51.8  | 64.05 | 80.49 | 42.82 |

|                          |       |        |        |       |        |       |       |
|--------------------------|-------|--------|--------|-------|--------|-------|-------|
| Max                      | 80.88 | 90.24  | 93.76  | 60.79 | 68.2   | 89.44 | 56.66 |
| Min                      | 67.86 | 79.59  | 80.73  | 29.52 | 61.33  | 70.46 | 41.89 |
| GEN 0.4+CPR 0.01+ERY 30  |       |        |        |       |        |       |       |
| Median (n=3)             | 85.14 | 65.36  | 63.46  | 13.7  | 69.86  | 41.05 | 22.76 |
| Max                      | 88.44 | 72.93  | 65.15  | 13.74 | 71.33  | 42.22 | 50.52 |
| Min                      | 83.36 | 56.99  | 51.95  | 13.09 | 63.42  | 34.21 | 21.14 |
| GEN 04+CPR 0.01+FOX 1    |       |        |        |       |        |       |       |
| Median (n=5)             | 73.75 | 91.21  | 73.83  | 44.49 | 64.85  | 73.97 | 41.47 |
| Max                      | 80.72 | 94.16  | 83.14  | 47.58 | 71.03  | 78    | 48.55 |
| Min                      | 72.13 | 82.47  | 67.16  | 40.29 | 63.55  | 71.04 | 40.22 |
| GEN 0.4+CPR 0.01+TOB 0.5 |       |        |        |       |        |       |       |
| Median (n=3)             | 77.52 | 88.17  | 70.99  | 62.11 | 67.02  | 63.46 | 34.18 |
| Max                      | 77.54 | 91.91  | 75.36  | 71.75 | 79.37  | 70.74 | 64.8  |
| Min                      | 68.88 | 85.5   | 69.74  | 51.77 | 51.57  | 50.25 | 0.92  |
| GEN 0.4+NTR 1.2+CPR 1    |       |        |        |       |        |       |       |
| Median (n=4)             | 77.53 | 90.455 | 86.835 | 59.34 | 62.645 | 66.65 | 10.48 |
| Max                      | 87.47 | 95     | 91.91  | 90.86 | 71.75  | 93.52 | 56.05 |
| Min                      | 68.88 | 78.43  | 83.8   | 31.22 | 51.77  | 52.14 | 1.33  |
| GEN 0.4+CLI 20+ERY 30    |       |        |        |       |        |       |       |

|                           |        |        |        |        |        |        |       |
|---------------------------|--------|--------|--------|--------|--------|--------|-------|
| Median (n=3)              | 83.37  | 76.49  | 62.91  | 64.03  | 61.5   | 56.01  | 53.49 |
| Max                       | 85.85  | 78.59  | 65.78  | 78.75  | 69.08  | 58.16  | 55.87 |
| Min                       | 79.79  | 73.05  | 61.54  | 61.02  | 57.8   | 55.11  | 48.43 |
| GEN 0.55+CLI 17.5+FOX 0.9 |        |        |        |        |        |        |       |
| Median (n=2)              | 62.445 | 77.225 | 74.935 | 36.83  | 37.875 | 37.84  | 38.2  |
| Max                       | 63.56  | 83.55  | 82.44  | 53.96  | 52.93  | 41.81  | 39.62 |
| Min                       | 61.33  | 70.9   | 67.43  | 19.7   | 22.82  | 33.87  | 36.78 |
| GEN 0.4+ERY 30+NTR 1      |        |        |        |        |        |        |       |
| Median (n=3)              | 85.98  | 89.46  | 90.6   | 77.27  | 75.14  | 75.62  | 68.37 |
| Max                       | 86.29  | 94.29  | 91.18  | 79.52  | 77.48  | 79.04  | 70.76 |
| Min                       | 81.98  | 89.29  | 89.48  | 76.63  | 69.86  | 74.15  | 65.68 |
| GEN 0.4+CPR 0.01+CLI 20   |        |        |        |        |        |        |       |
| Median (n=3)              | 85.98  | 88.83  | 75.61  | 70.99  | 72.39  | 62.66  | 54.42 |
| Max                       | 86.29  | 89.61  | 76.71  | 73.39  | 73.27  | 63.08  | 58.23 |
| Min                       | 81.98  | 86.97  | 72.25  | 64.34  | 69.72  | 55.6   | 53.35 |
| GEN 0.4+STR 2+NTR 1       |        |        |        |        |        |        |       |
| Median (n=6)              | 85.13  | 72.56  | 86.86  | 59.315 | 66.32  | 55.145 | 20.66 |
| Max                       | 85.36  | 74.49  | 87.92  | 77.57  | 68.84  | 64.95  | 23.83 |
| Min                       | 79.93  | 66.27  | 84.39  | 50.32  | 0.81   | 53.11  | 14.43 |



|                        |       |       |       |        |       |        |       |
|------------------------|-------|-------|-------|--------|-------|--------|-------|
| GEN 0.4+CHL 50+FOX 1   |       |       |       |        |       |        |       |
| Median (n=6)           | 85.13 | 78.96 | 68.82 | 77.235 | 44.8  | 20.425 | 26.93 |
| Max                    | 85.36 | 84.94 | 71.64 | 89.52  | 50.55 | 36.65  | 51.86 |
| Min                    | 79.93 | 76.17 | 62.33 | 70.41  | 40.74 | 15.53  | 15.3  |
| GEN 0.4+AMP 1.2+CLI 20 |       |       |       |        |       |        |       |
| Median (n=5)           | 73.74 | 76.44 | 72.88 | 21.5   | 68.22 | 42.77  | 9.77  |
| Max                    | 76.97 | 79.85 | 80.7  | 40.43  | 73.41 | 44.29  | 29.53 |
| Min                    | 69.64 | 63.83 | 62.13 | 15.73  | 66.8  | 7.02   | 2.84  |
| GEN 0.4+CHL 40+CLI 20  |       |       |       |        |       |        |       |
| Median (n=4)           | 81.77 | 82.46 | 79.4  | 80.335 | 72.47 | 78.72  | 80.14 |
| Max                    | 84.48 | 88.92 | 88.48 | 84.87  | 86    | 79.7   | 89.06 |
| Min                    | 72.36 | 69.63 | 75.72 | 74.6   | 62.96 | 67.94  | 68.15 |
| GEN 0.4+ERY 30+TOB 0.5 |       |       |       |        |       |        |       |
| Median (n=3)           | 77.02 | 71.58 | 76.48 | 67.48  | 64.53 | 72.14  | 67.98 |
| Max                    | 77.33 | 74.29 | 82.02 | 69.93  | 65.48 | 72.99  | 70.25 |
| Min                    | 71.1  | 67.61 | 74.44 | 65.54  | 63.39 | 68.19  | 65.33 |
| GEN 0.4+ERY 30+FOX     |       |       |       |        |       |        |       |
| Median (n=3)           | 77.02 | 71.58 | 73.27 | 67.48  | 18.55 | 32.15  | 35.12 |
| Max                    | 77.33 | 74.29 | 82.56 | 69.93  | 19.75 | 36.25  | 37.37 |

|                          |        |       |        |        |       |        |        |
|--------------------------|--------|-------|--------|--------|-------|--------|--------|
| Min                      | 71.1   | 67.61 | 71.14  | 65.54  | 16.78 | 31.89  | 27.14  |
| GEN 0.4+CHL 40+AMP 1.2   |        |       |        |        |       |        |        |
| Median (n=4)             | 77.515 | 89.02 | 66.385 | 77.965 | 29.47 | 15.345 | 5.685  |
| Max                      | 85.49  | 94.18 | 76.48  | 84.75  | 34.72 | 20.37  | 6.52   |
| Min                      | 71.76  | 83.49 | 59.56  | 68.93  | 21.5  | 14.02  | 4.4    |
| GEN 0.4+CHL 40+NTR 1     |        |       |        |        |       |        |        |
| Median (n=4)             | 83.755 | 70.81 | 90.355 | 66.825 | 74.41 | 72.485 | 61.205 |
| Max                      | 96.43  | 78.37 | 94.45  | 76.31  | 78.68 | 74.41  | 67.52  |
| Min                      | 77.04  | 67.11 | 84.01  | 65.18  | 70.12 | 69.88  | 57.05  |
| GEN 0.4+AMP 1.2+ERY 30   |        |       |        |        |       |        |        |
| Median (n=4)             | 61.255 | 84.92 | 77.755 | 24.655 | 63.8  | 19.45  | 9.88   |
| Max                      | 64.19  | 89.34 | 83.31  | 27.27  | 70.48 | 31.61  | 10.24  |
| Min                      | 55.11  | 76.92 | 72.52  | 19.85  | 62.29 | 16.65  | 1.25   |
| GEN 0.4+AMP 1.2+CPR 0.01 |        |       |        |        |       |        |        |
| Median (n=3)             | 62.23  | 86.39 | 83.96  | 26.43  | 50.23 | 45.11  | 4.45   |
| Max                      | 64.19  | 89.34 | 85.54  | 27.27  | 59.08 | 50.01  | 6.16   |
| Min                      | 55.11  | 76.92 | 79.02  | 22.88  | 47.22 | 28.1   | 4.31   |
| FUS 80+CHL 50+CPR 0.01   |        |       |        |        |       |        |        |
| Median (n=4)             | 64.875 | 79.73 | 89.35  | 43.56  | 43.92 | 77.185 | 27.595 |

|                         |        |       |        |       |        |        |        |
|-------------------------|--------|-------|--------|-------|--------|--------|--------|
| Max                     | 73.26  | 83.54 | 92.48  | 48.96 | 57.89  | 79.21  | 32.91  |
| Min                     | 55.82  | 73.93 | 86.58  | 38.07 | 38.9   | 71.71  | 25.73  |
| FUS 80+CHL 50+STR 2     |        |       |        |       |        |        |        |
| Median (n=4)            | 64.875 | 79.73 | 69.875 | 43.56 | 38.53  | 69.075 | 23.505 |
| Max                     | 73.26  | 83.54 | 72.08  | 48.96 | 40.1   | 71.53  | 34.35  |
| Min                     | 55.82  | 73.93 | 68.61  | 38.07 | 29.35  | 67.1   | 19.78  |
| FUS 80+CHL 50+NTR 1     |        |       |        |       |        |        |        |
| Median (n=4)            | 64.875 | 79.73 | 86.905 | 43.56 | 73.75  | 68.655 | 45.405 |
| Max                     | 73.26  | 83.54 | 88.79  | 48.96 | 75.67  | 68.89  | 48.39  |
| Min                     | 55.82  | 73.93 | 86.29  | 38.07 | 72.04  | 68.13  | 34.69  |
| FUS 80+CHL 50+TOB 0.5   |        |       |        |       |        |        |        |
| Median (n=4)            | 64.875 | 79.73 | 73.49  | 43.56 | 30.625 | 74.24  | 32.47  |
| Max                     | 73.26  | 83.54 | 73.64  | 48.96 | 34.78  | 76.65  | 39.39  |
| Min                     | 55.82  | 73.93 | 72.27  | 38.07 | 20.77  | 72.43  | 26.01  |
| FUS 80+CHL 50+CLI 20    |        |       |        |       |        |        |        |
| Median (n=4)            | 64.875 | 79.73 | 72.235 | 43.56 | 60.55  | 72.38  | 32.68  |
| Max                     | 73.26  | 83.54 | 77.5   | 48.96 | 61.99  | 76.41  | 37.4   |
| Min                     | 55.82  | 73.93 | 70.82  | 38.07 | 50.15  | 63.53  | 31.51  |
| FUS 80+GEN 0.4+TMP 0.07 |        |       |        |       |        |        |        |

|                        |       |       |       |       |       |       |       |
|------------------------|-------|-------|-------|-------|-------|-------|-------|
| Median (n=3)           | 77.68 | 72.51 | 81.59 | 42.87 | 46.3  | 62.03 | 0.99  |
| Max                    | 79.17 | 73.98 | 82.36 | 49.16 | 58.6  | 64.63 | 4.01  |
| Min                    | 74.9  | 67.44 | 73.56 | 40.45 | 43.22 | 48.93 | 0.69  |
| FUS 80+GEN 0.4+CLI 20  |       |       |       |       |       |       |       |
| Median (n=5)           | 78.38 | 70.99 | 69.82 | 42.87 | 62.54 | 71    | 55.38 |
| Max                    | 79.17 | 73.98 | 74.93 | 56.65 | 70.14 | 76    | 57.19 |
| Min                    | 74.9  | 67.44 | 65.86 | 40.45 | 59.45 | 68.36 | 49.73 |
| FUS 80+GEN 0.4+TOB 0.5 |       |       |       |       |       |       |       |
| Median (n=5)           | 78.38 | 70.99 | 62.08 | 42.87 | 37.56 | 36.49 | 1.82  |
| Max                    | 79.17 | 73.98 | 64.91 | 56.65 | 42.84 | 46.44 | 7.81  |
| Min                    | 74.9  | 67.44 | 54.91 | 40.45 | 31.03 | 30.22 | 0.9   |
| FUS 80+CLI 20+TOB 0.5  |       |       |       |       |       |       |       |
| Median (n=5)           | 78.38 | 69.82 | 62.08 | 62.54 | 37.56 | 66.1  | 48.88 |
| Max                    | 79.17 | 74.93 | 64.91 | 70.14 | 42.84 | 67.85 | 62.29 |
| Min                    | 74.9  | 65.86 | 54.91 | 59.45 | 31.03 | 60.49 | 45.43 |
| FUS 80+TMP 0.07+CLI 20 |       |       |       |       |       |       |       |
| Median (n=3)           | 77.68 | 81.59 | 72.76 | 46.3  | 68.31 | 39.29 | 1.33  |
| Max                    | 79.17 | 82.36 | 74.93 | 58.6  | 70.14 | 46.31 | 5.24  |
| Min                    | 74.9  | 73.56 | 68.21 | 43.22 | 62.54 | 31.81 | 1.32  |

|                                |        |        |        |        |        |        |        |
|--------------------------------|--------|--------|--------|--------|--------|--------|--------|
| <b>FUS 80+TMP 0.07+TOB 0.5</b> |        |        |        |        |        |        |        |
| Median (n=3)                   | 77.68  | 81.59  | 62.08  | 46.3   | 37.19  | 50.16  | 1.11   |
| Max                            | 79.17  | 82.36  | 64.91  | 58.6   | 41.68  | 50.5   | 1.38   |
| Min                            | 74.9   | 73.56  | 57.07  | 43.22  | 31.03  | 38.71  | 0.81   |
| <b>FUS 80+NTR 1+FOX</b>        |        |        |        |        |        |        |        |
| Median (n=4)                   | 65.255 | 85.585 | 60.125 | 69.2   | 19.785 | 61.145 | 28.745 |
| Max                            | 68.41  | 91.39  | 67.2   | 71.34  | 26.69  | 62.29  | 34.93  |
| Min                            | 61.78  | 78.17  | 55.93  | 60.57  | 18.01  | 54.57  | 24.86  |
| <b>FUS 80+NTR 1+CLI 20</b>     |        |        |        |        |        |        |        |
| Median (n=4)                   | 65.255 | 85.585 | 74.995 | 69.2   | 46.825 | 69.415 | 46.315 |
| Max                            | 68.41  | 91.39  | 77.24  | 71.34  | 50.41  | 76.12  | 53.22  |
| Min                            | 61.78  | 78.17  | 66.52  | 60.57  | 41.26  | 63.41  | 38.54  |
| <b>FUS 80+NTR 1+TOB 0.5</b>    |        |        |        |        |        |        |        |
| Median (n=4)                   | 65.255 | 85.585 | 70.065 | 69.2   | 23.505 | 59.255 | 32.91  |
| Max                            | 68.41  | 91.39  | 75.43  | 71.34  | 29.82  | 65.06  | 35.5   |
| Min                            | 61.78  | 78.17  | 67.84  | 60.57  | 15.33  | 54.12  | 26.81  |
| <b>FUS 80+FOX 1+CLI 20</b>     |        |        |        |        |        |        |        |
| Median (n=4)                   | 65.255 | 60.125 | 74.995 | 19.785 | 46.825 | 33.58  | 17.51  |
| Max                            | 68.41  | 67.2   | 77.24  | 26.69  | 50.41  | 43.19  | 24.44  |

|                         |        |        |        |        |        |       |        |
|-------------------------|--------|--------|--------|--------|--------|-------|--------|
| Min                     | 61.78  | 55.93  | 66.52  | 18.01  | 41.26  | 26.04 | 15.23  |
| FUS 80+FOX 1+TOB 0.5    |        |        |        |        |        |       |        |
| Median (n=4)            | 65.255 | 60.125 | 70.065 | 19.785 | 23.505 | 43.39 | 3.03   |
| Max                     | 68.41  | 67.2   | 75.43  | 26.69  | 29.82  | 53.28 | 4.78   |
| Min                     | 61.78  | 55.93  | 67.84  | 18.01  | 15.33  | 40.96 | 1.95   |
| FUS 80+CHL 50+FOX 1     |        |        |        |        |        |       |        |
| Median (n=4)            | 65.255 | 77.02  | 60.125 | 35.645 | 19.785 | 28.32 | 2.04   |
| Max                     | 68.41  | 83.01  | 67.2   | 38.76  | 26.69  | 37.25 | 4.85   |
| Min                     | 61.78  | 67.75  | 55.93  | 24.6   | 18.01  | 24.97 | 1.1    |
| FUS 80+AMP 1.2+CPR 0.01 |        |        |        |        |        |       |        |
| Median (n=4)            | 73.075 | 73.935 | 89.29  | 0.85   | 51.025 | 45.05 | 0.635  |
| Max                     | 74.41  | 78.44  | 90.54  | 1.24   | 66.78  | 52.73 | 0.67   |
| Min                     | 64.71  | 68.84  | 87.25  | 0.42   | 46.39  | 25.71 | 0.57   |
| FUS 80+AMP 1.2+STR 2    |        |        |        |        |        |       |        |
| Median (n=4)            | 73.075 | 73.935 | 69.8   | 0.85   | 45.08  | 27.46 | 0.6    |
| Max                     | 74.41  | 78.44  | 75.63  | 1.24   | 48.87  | 29.23 | 0.71   |
| Min                     | 64.71  | 68.84  | 66.88  | 0.42   | 32.08  | 25.96 | 0.54   |
| FUS 80+AMP 1.2+NTR 1    |        |        |        |        |        |       |        |
| Median (n=4)            | 73.075 | 73.935 | 86.63  | 0.85   | 76.495 | 65.46 | 13.135 |

|                        |        |        |        |        |        |        |       |
|------------------------|--------|--------|--------|--------|--------|--------|-------|
| Max                    | 74.41  | 78.44  | 96.78  | 1.24   | 78.07  | 77.24  | 19.52 |
| Min                    | 64.71  | 68.84  | 83.31  | 0.42   | 71.34  | 50.85  | 6.26  |
| FUS 80+AMP 1.2+CLI 20  |        |        |        |        |        |        |       |
| Median (n=4)           | 73.075 | 73.935 | 73.415 | 0.85   | 62.505 | 15.45  | 0.565 |
| Max                    | 74.41  | 78.44  | 84.88  | 1.24   | 68.63  | 18.15  | 1.46  |
| Min                    | 64.71  | 68.84  | 72.16  | 0.42   | 58.07  | 10.94  | 0.49  |
| FUS 80+AMP 1.2+TOB 0.5 |        |        |        |        |        |        |       |
| Median (n=4)           | 73.075 | 73.935 | 73.725 | 0.85   | 38.575 | 28.685 | 0.565 |
| Max                    | 74.41  | 78.44  | 77.75  | 1.24   | 48.96  | 30.55  | 0.64  |
| Min                    | 64.71  | 68.84  | 70.41  | 0.42   | 27.11  | 23.56  | 0.55  |
| FUS 80+STR 2+CLI 20    |        |        |        |        |        |        |       |
| Median (n=4)           | 64.81  | 75.67  | 62.305 | 39.245 | 49.11  | 60.255 | 36.83 |
| Max                    | 68.57  | 82.23  | 69.94  | 46.15  | 54.93  | 63.15  | 61.46 |
| Min                    | 61.96  | 65.69  | 60.87  | 36.07  | 42.37  | 53.56  | 23.3  |
| FUS 80+CPR 0.01+CLI 20 |        |        |        |        |        |        |       |
| Median (n=5)           | 65.61  | 82.69  | 62.04  | 45.58  | 51.61  | 47.36  | 25.51 |
| Max                    | 68.61  | 86.76  | 69.94  | 98.94  | 54.93  | 55.74  | 39.94 |
| Min                    | 61.96  | 75.02  | 60.8   | 42.46  | 42.37  | 37.02  | 22.64 |
| FUS 80+ERY 30+CLI 20   |        |        |        |        |        |        |       |

|                          |        |        |       |        |        |        |        |
|--------------------------|--------|--------|-------|--------|--------|--------|--------|
| Median (n=5)             | 65.61  | 65.1   | 62.04 | 38.46  | 51.61  | 48.85  | 20.7   |
| Max                      | 68.61  | 69.7   | 69.94 | 44.84  | 54.93  | 58.68  | 29.61  |
| Min                      | 61.96  | 56.73  | 60.8  | 34.31  | 42.37  | 46.07  | 14.54  |
| FUS 80+TMP 0.07+CPR 0.01 |        |        |       |        |        |        |        |
| Median (n=4)             | 64.81  | 56.315 | 83.99 | 43.045 | 48.8   | 43.265 | 13.87  |
| Max                      | 68.57  | 63.81  | 86.76 | 52.57  | 98.94  | 49.15  | 21.2   |
| Min                      | 61.96  | 54.49  | 75.02 | 38.77  | 42.46  | 37.47  | 10.51  |
| FUS 80+TMP 0.07+STR 2    |        |        |       |        |        |        |        |
| Median (n=4)             | 64.81  | 56.315 | 75.67 | 43.045 | 39.245 | 82.835 | 11.095 |
| Max                      | 68.57  | 63.81  | 82.23 | 52.57  | 46.15  | 99.42  | 12.86  |
| Min                      | 61.96  | 54.49  | 65.69 | 38.77  | 36.07  | 78.88  | 10.47  |
| FUS 80+TMP 0.07+CHL 50   |        |        |       |        |        |        |        |
| Median (n=4)             | 76.265 | 84.25  | 87.33 | 53.57  | 55.425 | 77.45  | 45.055 |
| Max                      | 84.26  | 85.68  | 93.4  | 64.26  | 58.11  | 92.88  | 52.33  |
| Min                      | 69.67  | 79.13  | 83.51 | 51.68  | 47.71  | 66.84  | 31.99  |
| FUS 80+TMP 0.07+AMP 1.2  |        |        |       |        |        |        |        |
| Median (n=3)             | 77.92  | 85.67  | 64.01 | 53.77  | 0.61   | 1.79   | 0.78   |
| Max                      | 84.26  | 85.68  | 70.38 | 64.26  | 0.76   | 3.42   | 0.8    |
| Min                      | 74.61  | 82.83  | 60.13 | 53.37  | 0.54   | 0.85   | 0.72   |



|                        |        |       |        |       |       |       |        |
|------------------------|--------|-------|--------|-------|-------|-------|--------|
| FUS 80+TMP 0.07+FOX 1  |        |       |        |       |       |       |        |
| Median (n=3)           | 77.92  | 85.67 | 50.91  | 53.77 | 31.44 | 25.04 | 18.2   |
| Max                    | 84.26  | 85.68 | 55.83  | 64.26 | 33.44 | 31.74 | 22.07  |
| Min                    | 74.61  | 82.83 | 45.45  | 53.37 | 18.93 | 23.01 | 14.27  |
| FUS 80+TMP 0.07+ERY 30 |        |       |        |       |       |       |        |
| Median (n=3)           | 74.61  | 85.67 | 84.2   | 53.77 | 9.71  | 50.92 | 0.91   |
| Max                    | 84.26  | 85.68 | 93.36  | 64.26 | 48.6  | 52.71 | 1.39   |
| Min                    | 69.67  | 79.13 | 70.89  | 51.68 | 9.61  | 45.81 | 0.88   |
| FUS 80+TMP 0.07+NTR 1  |        |       |        |       |       |       |        |
| Median (n=4)           | 76.265 | 84.25 | 78.345 | 53.57 | 71.62 | 66.31 | 21.965 |
| Max                    | 84.26  | 85.68 | 80.55  | 64.26 | 72.55 | 72.34 | 36.73  |
| Min                    | 69.67  | 79.13 | 76.43  | 51.68 | 67.22 | 47.69 | 4.68   |
| FUS 80+ERY 30+CPR 0.01 |        |       |        |       |       |       |        |
| Median (n=3)           | 55.04  | 83.41 | 85.9   | 37.06 | 61.06 | 77.19 | 15.89  |
| Max                    | 57.85  | 92.06 | 91.45  | 42.47 | 64.95 | 92.52 | 18.09  |
| Min                    | 47.91  | 76.32 | 79.86  | 10.53 | 37.86 | 76.96 | 15.52  |
| FUS 80+ERY 30+STR 2    |        |       |        |       |       |       |        |
| Median (n=5)           | 57.85  | 84.46 | 73.33  | 37.06 | 40.15 | 71.76 | 18.94  |
| Max                    | 62.91  | 92.06 | 74.74  | 45.89 | 46.54 | 80.74 | 33.05  |

|                        |        |        |        |       |       |        |       |
|------------------------|--------|--------|--------|-------|-------|--------|-------|
| Min                    | 47.91  | 76.32  | 60.78  | 10.53 | 33.74 | 64.86  | 3.75  |
| FUS 80+ERY 30+NTR 1    |        |        |        |       |       |        |       |
| Median (n=5)           | 57.85  | 84.46  | 83.66  | 37.06 | 64.84 | 71.56  | 52.98 |
| Max                    | 62.91  | 92.06  | 94.33  | 45.89 | 75.22 | 76.82  | 60.41 |
| Min                    | 47.91  | 76.32  | 77.84  | 10.53 | 53.73 | 63.51  | 45.69 |
| FUS 80+ERY 30+FOX 1    |        |        |        |       |       |        |       |
| Median (n=4)           | 56.445 | 87.58  | 70.61  | 24.08 | 28.99 | 46.41  | 6.78  |
| Max                    | 62.91  | 92.06  | 77.79  | 42.47 | 35.96 | 48.13  | 12.99 |
| Min                    | 47.91  | 76.32  | 64.5   | 10.53 | 14.49 | 27.62  | 2.11  |
| FUS 80+GEN 0.4+FOX 1   |        |        |        |       |       |        |       |
| Median (n=4)           | 56.445 | 77.27  | 70.61  | 45.8  | 28.99 | 37.96  | 8.125 |
| Max                    | 62.91  | 83.28  | 77.79  | 49.81 | 35.96 | 45.67  | 13.29 |
| Min                    | 47.91  | 68.55  | 64.5   | 33.56 | 14.49 | 36.86  | 6.79  |
| VAN 75+FUS 80+CPR 0.01 |        |        |        |       |       |        |       |
| Median (n=3)           | 69.06  | 61.18  | 74.43  | 26.61 | 5.19  | 43.68  | 0.49  |
| Max                    | 78.2   | 70.84  | 89.49  | 35.18 | 19.22 | 53.91  | 0.9   |
| Min                    | 61.2   | 57.69  | 72.9   | 23.89 | 2.51  | 35.42  | 0.47  |
| VAN 75+FUS 80+ERY 30   |        |        |        |       |       |        |       |
| Median (n=4)           | 69.39  | 67.125 | 98.235 | 28.98 | 32.17 | 13.575 | 2.485 |

|                       |        |        |        |        |        |        |       |
|-----------------------|--------|--------|--------|--------|--------|--------|-------|
| Max                   | 73.53  | 70.84  | 112.98 | 35.18  | 74.52  | 34.33  | 4.66  |
| Min                   | 61.2   | 61.18  | 95.43  | 26.61  | 28.56  | 6.06   | 0.65  |
| VAN 75+FUS 80+FOX 1   |        |        |        |        |        |        |       |
| Median (n=4)          | 71.625 | 63.675 | 72.885 | 27.21  | 60.45  | 36.28  | 10.34 |
| Max                   | 78.2   | 68.08  | 80.81  | 30.15  | 70.12  | 40.13  | 15.22 |
| Min                   | 69.06  | 57.69  | 63.16  | 23.89  | 53.61  | 34.11  | 5.22  |
| VAN 75+FUS 80+CLI 20  |        |        |        |        |        |        |       |
| Median (n=4)          | 69.39  | 63.675 | 67.865 | 28.38  | 18.71  | 46.765 | 0.885 |
| Max                   | 78.2   | 70.84  | 79.78  | 35.18  | 39.67  | 52.38  | 1.82  |
| Min                   | 61.2   | 57.69  | 62.83  | 23.89  | 16.91  | 45.13  | 0.52  |
| VAN 75+FUS 80+TOB 0.5 |        |        |        |        |        |        |       |
| Median (n=4)          | 86.5   | 63.23  | 89.26  | 16.755 | 69.615 | 47.135 | 1.09  |
| Max                   | 94.74  | 69.54  | 93.35  | 36.88  | 79     | 52.32  | 3.62  |
| Min                   | 78.15  | 60.88  | 85.51  | 10.11  | 67.56  | 36.92  | 0.76  |
| VAN 75+FUS 80+GEN 0.4 |        |        |        |        |        |        |       |
| Median (n=5)          | 73.62  | 68.01  | 90.45  | 33.92  | 48.92  | 34.45  | 3.47  |
| Max                   | 84.89  | 69.15  | 97.33  | 47.57  | 56.31  | 35.69  | 6.32  |
| Min                   | 70.85  | 64.1   | 89.42  | 30.16  | 42.49  | 29.25  | 1.01  |
| VAN 75+FUS 80+CHL 50  |        |        |        |        |        |        |       |

|                        |       |       |        |        |        |       |       |
|------------------------|-------|-------|--------|--------|--------|-------|-------|
| Median (n=5)           | 73.62 | 68.01 | 88.79  | 33.92  | 38.51  | 34.83 | 1.5   |
| Max                    | 84.89 | 69.15 | 91.42  | 47.57  | 43.2   | 49.41 | 2.66  |
| Min                    | 70.85 | 64.1  | 86.52  | 30.16  | 33.32  | 32.91 | 1.28  |
| VAN 75+FUS 80+TMP 0.07 |       |       |        |        |        |       |       |
| Median (n=5)           | 73.62 | 68.01 | 75.58  | 33.92  | 0.8    | 44.23 | 3.38  |
| Max                    | 84.89 | 69.15 | 82.56  | 47.57  | 0.93   | 56.63 | 13.7  |
| Min                    | 70.85 | 64.1  | 60.59  | 30.16  | 0.57   | 36.68 | 0.87  |
| VAN 75+FUS 80+NTR 1    |       |       |        |        |        |       |       |
| Median (n=5)           | 73.62 | 68.01 | 89.95  | 33.92  | 63.37  | 77.18 | 30.44 |
| Max                    | 84.89 | 69.15 | 98.89  | 47.57  | 72.52  | 78.63 | 34.47 |
| Min                    | 70.85 | 64.1  | 81.82  | 30.16  | 56.02  | 64.64 | 21.57 |
| VAN 75+FUS 80+AMP 1    |       |       |        |        |        |       |       |
| Median (n=5)           | 91.99 | 62.72 | 79.38  | 14.89  | 53.79  | 0.93  | 0.68  |
| Max                    | 95.32 | 69.54 | 87.66  | 36.88  | 58.69  | 2.63  | 0.81  |
| Min                    | 78.15 | 50.07 | 74.51  | 3.85   | 46.08  | 0.69  | 0.58  |
| VAN 75+GEN 0.4+STR 2   |       |       |        |        |        |       |       |
| Median (n=4)           | 73.91 | 69.78 | 65.485 | 36.725 | 25.845 | 37.98 | 18.32 |
| Max                    | 85.9  | 75.08 | 71.79  | 40.07  | 36.98  | 50.37 | 20.17 |
| Min                    | 68.28 | 62.73 | 61.38  | 32.96  | 23.72  | 31.9  | 10.23 |

|                              |       |        |        |        |        |       |        |
|------------------------------|-------|--------|--------|--------|--------|-------|--------|
| <b>VAN 75+GEN 0.4+ERY 30</b> |       |        |        |        |        |       |        |
| Median (n=5)                 | 76.78 | 67.9   | 94.15  | 35.08  | 34.97  | 62.85 | 39.6   |
| Max                          | 85.9  | 75.08  | 100.64 | 40.07  | 57.94  | 86.13 | 52.17  |
| Min                          | 68.28 | 62.73  | 86.15  | 32.52  | 28.54  | 57.84 | 26.13  |
| <b>VAN 75+GEN 0.4+FOX 1</b>  |       |        |        |        |        |       |        |
| Median (n=4)                 | 72.71 | 66.65  | 74.965 | 34.02  | 49.78  | 26.97 | 15.335 |
| Max                          | 79.18 | 71.66  | 80.42  | 40.07  | 65.6   | 28.52 | 23.06  |
| Min                          | 68.28 | 62.73  | 64.91  | 32.52  | 40.93  | 22.24 | 12.62  |
| <b>VAN 75+GEN 0.4+CLI 20</b> |       |        |        |        |        |       |        |
| Median (n=5)                 | 76.78 | 67.9   | 72.81  | 35.08  | 36.45  | 61.68 | 27.15  |
| Max                          | 85.9  | 75.08  | 90.14  | 40.07  | 45.82  | 75.56 | 33.24  |
| Min                          | 68.28 | 62.73  | 68.39  | 32.52  | 24.67  | 51.72 | 22.03  |
| <b>VAN 75+FUS 80+STR 2</b>   |       |        |        |        |        |       |        |
| Median (n=4)                 | 73.91 | 67.145 | 65.485 | 28.355 | 25.845 | 38.42 | 0.52   |
| Max                          | 85.9  | 74.4   | 71.79  | 41.19  | 36.98  | 45.44 | 0.61   |
| Min                          | 68.28 | 67     | 61.38  | 8.24   | 23.72  | 34.52 | 0.43   |
| <b>VAN 75+GEN 0.4+CHL 50</b> |       |        |        |        |        |       |        |
| Median (n=5)                 | 83.35 | 80.1   | 85.44  | 60.81  | 52.06  | 83.26 | 45.82  |
| Max                          | 88.31 | 81.18  | 88.69  | 65.74  | 62.04  | 86.02 | 47.81  |

|                         |        |       |        |       |        |        |       |
|-------------------------|--------|-------|--------|-------|--------|--------|-------|
| Min                     | 79.15  | 79.75 | 80.59  | 54.33 | 50.79  | 77.93  | 38.01 |
| VAN 75+GEN 0.4+TMP 0.07 |        |       |        |       |        |        |       |
| Median (n=5)            | 83.35  | 80.1  | 84.32  | 60.81 | 0.37   | 65.69  | 0.65  |
| Max                     | 88.31  | 81.18 | 91.25  | 65.74 | 0.74   | 67.46  | 20.76 |
| Min                     | 79.15  | 79.75 | 78.56  | 54.33 | 0.21   | 51.77  | 0.14  |
| VAN 75+GEN 0.4+NTR 1    |        |       |        |       |        |        |       |
| Median (n=5)            | 83.35  | 80.1  | 85.95  | 60.81 | 58.08  | 66.92  | 38.07 |
| Max                     | 88.31  | 81.18 | 86.65  | 65.74 | 61.08  | 68.6   | 43.04 |
| Min                     | 79.15  | 79.75 | 80.31  | 54.33 | 54.79  | 63.32  | 22.49 |
| VAN 75+GEN 0.4+TOB 0.5  |        |       |        |       |        |        |       |
| Median (n=5)            | 83.35  | 80.1  | 85.13  | 60.81 | 69.74  | 66.18  | 40.99 |
| Max                     | 88.31  | 81.18 | 86.86  | 65.74 | 77.76  | 67.09  | 43.8  |
| Min                     | 79.15  | 79.75 | 84.4   | 54.33 | 62.34  | 60.76  | 23.98 |
| VAN 75+AMP 1+NTR 1      |        |       |        |       |        |        |       |
| Median (n=5)            | 92.79  | 79.38 | 86.8   | 53.79 | 72.66  | 72.18  | 30.41 |
| Max                     | 95.79  | 85.36 | 93.55  | 58.69 | 75.66  | 73.25  | 49.44 |
| Min                     | 81.01  | 74.54 | 84.51  | 47.76 | 57.53  | 70.94  | 28.38 |
| VAN 75+AMP 1+TOB 0.5    |        |       |        |       |        |        |       |
| Median (n=6)            | 93.765 | 80.7  | 88.385 | 54.78 | 76.615 | 41.645 | 39.2  |

|                       |        |       |        |       |        |        |        |
|-----------------------|--------|-------|--------|-------|--------|--------|--------|
| Max                   | 95.79  | 87.66 | 94.1   | 58.5  | 82.11  | 63.07  | 40.82  |
| Min                   | 91.99  | 69.18 | 83.29  | 47.76 | 67.28  | 31.54  | 30.91  |
| VAN 75+AMP 1+FOX 1    |        |       |        |       |        |        |        |
| Median (n=6)          | 93.765 | 80.7  | 73.12  | 54.78 | 71.775 | 23.745 | 17.505 |
| Max                   | 95.79  | 87.66 | 80.86  | 58.5  | 80.22  | 27.21  | 20.62  |
| Min                   | 91.99  | 69.18 | 63.26  | 47.76 | 57.12  | 21.53  | 15.24  |
| VAN 75+AMP 1+CLI 20   |        |       |        |       |        |        |        |
| Median (n=4)          | 89.575 | 81.76 | 70.4   | 54.54 | 40.245 | 20.035 | 6.295  |
| Max                   | 95.79  | 89.44 | 77.84  | 56.31 | 49.19  | 21.95  | 13.76  |
| Min                   | 81.06  | 74.54 | 69.92  | 47.9  | 32.56  | 17.21  | 0.85   |
| VAN 75+NTR 1+TOB 0.5  |        |       |        |       |        |        |        |
| Median (n=4)          | 94.15  | 86.74 | 83.895 | 74.9  | 78.17  | 77.065 | 59.54  |
| Max                   | 95.79  | 89.34 | 84.65  | 75.66 | 82.32  | 79.27  | 60.89  |
| Min                   | 92.24  | 85.36 | 83.29  | 63.96 | 67.28  | 75.74  | 57.72  |
| VAN 75+NTR 1+CPR 0.01 |        |       |        |       |        |        |        |
| Median (n=5)          | 86.11  | 88.1  | 87.69  | 54.39 | 48.99  | 79.61  | 3.88   |
| Max                   | 101.73 | 89.94 | 88.66  | 55.85 | 54.5   | 82.03  | 8.87   |
| Min                   | 77.28  | 80.05 | 84.89  | 53.77 | 24.09  | 69.24  | 0.72   |
| VAN 75+NTR 1+STR 2    |        |       |        |       |        |        |        |

|                      |        |        |        |       |        |        |       |
|----------------------|--------|--------|--------|-------|--------|--------|-------|
| Median (n=7)         | 86.11  | 89.94  | 74.92  | 55.85 | 54.91  | 63.89  | 30.88 |
| Max                  | 94.02  | 113.89 | 96.72  | 80.99 | 61.67  | 80.14  | 57.07 |
| Min                  | 77.28  | 80.05  | 70.9   | 53.77 | 39.69  | 55.68  | 2.84  |
| VAN 75+NTR 1+FOX 1   |        |        |        |       |        |        |       |
| Median (n=4)         | 83.395 | 87.22  | 70.905 | 54.6  | 70.47  | 56.17  | 49.41 |
| Max                  | 94.02  | 89.94  | 72.86  | 55.85 | 72.67  | 58.44  | 55.16 |
| Min                  | 77.28  | 80.05  | 64.43  | 53.77 | 64.01  | 49.73  | 46.35 |
| VAN 75+NTR 1+ERY 30  |        |        |        |       |        |        |       |
| Median (n=4)         | 83.395 | 87.22  | 85.305 | 54.6  | 65.715 | 74.965 | 37.43 |
| Max                  | 94.02  | 89.94  | 88.02  | 55.85 | 74.24  | 76.19  | 50.59 |
| Min                  | 77.28  | 80.05  | 78.52  | 53.77 | 61.58  | 70.03  | 36.96 |
| VAN 75+NTR 1+CLI 20  |        |        |        |       |        |        |       |
| Median (n=4)         | 83.395 | 87.22  | 72.01  | 54.6  | 46.715 | 68.335 | 0.68  |
| Max                  | 94.02  | 89.94  | 75.07  | 55.85 | 47.21  | 73.54  | 0.74  |
| Min                  | 77.28  | 80.05  | 67.69  | 53.77 | 45.11  | 61.8   | 0.61  |
| VAN 75+TOB 0.5+FOX 1 |        |        |        |       |        |        |       |
| Median (n=3)         | 96.7   | 79.83  | 64.52  | 49.96 | 59.76  | 32.33  | 19.82 |
| Max                  | 99.82  | 86.82  | 72.79  | 55.27 | 65.24  | 36.01  | 28.89 |
| Min                  | 90.73  | 78.82  | 57.41  | 45.86 | 58.25  | 31.08  | 17.05 |



|                       |       |       |       |       |       |       |       |
|-----------------------|-------|-------|-------|-------|-------|-------|-------|
| VAN 75+TOB 0.5+ERY 30 |       |       |       |       |       |       |       |
| Median (n=3)          | 96.7  | 79.83 | 84.07 | 49.96 | 48.65 | 57.11 | 56.8  |
| Max                   | 99.82 | 86.82 | 91.4  | 55.27 | 51.8  | 62.17 | 60.82 |
| Min                   | 90.73 | 78.82 | 80.29 | 45.86 | 46.59 | 55.23 | 39.18 |
| VAN 75+TOB 0.5+CLI 20 |       |       |       |       |       |       |       |
| Median (n=3)          | 96.7  | 79.83 | 69.62 | 49.96 | 40.09 | 66.54 | 27.63 |
| Max                   | 99.82 | 86.82 | 72.17 | 55.27 | 43.37 | 73.19 | 37.35 |
| Min                   | 90.73 | 78.82 | 66.7  | 45.86 | 36.14 | 56.65 | 27.06 |
| VAN 75+FOX 1+ERY 30   |       |       |       |       |       |       |       |
| Median (n=3)          | 96.7  | 64.52 | 84.07 | 59.76 | 48.65 | 27.1  | 13.72 |
| Max                   | 99.82 | 72.79 | 91.4  | 65.24 | 51.8  | 28.39 | 13.93 |
| Min                   | 90.73 | 57.41 | 80.29 | 58.25 | 46.59 | 24.1  | 8.87  |
| VAN 75+FOX 1+CLI 20   |       |       |       |       |       |       |       |
| Median (n=3)          | 96.7  | 64.52 | 69.62 | 59.76 | 40.09 | 24.22 | 14.64 |
| Max                   | 99.82 | 72.79 | 72.17 | 65.24 | 43.37 | 25.88 | 15.03 |
| Min                   | 90.73 | 57.41 | 66.7  | 58.25 | 36.14 | 20.89 | 9.61  |
| VAN 75+ERY 30+CLI 20  |       |       |       |       |       |       |       |
| Median (n=3)          | 96.7  | 84.07 | 69.62 | 48.65 | 40.09 | 57.47 | 18.9  |
| Max                   | 99.82 | 91.4  | 72.17 | 51.8  | 43.37 | 59.56 | 20.74 |

|                        |        |       |       |       |       |       |       |
|------------------------|--------|-------|-------|-------|-------|-------|-------|
| Min                    | 90.73  | 80.29 | 66.7  | 46.59 | 36.14 | 50.37 | 11.34 |
| VAN 75+CHL 50+TOB 0.5  |        |       |       |       |       |       |       |
| Median (n=3)           | 74.25  | 83.86 | 94.35 | 62.86 | 67.72 | 83.63 | 47.05 |
| Max                    | 85     | 91.06 | 94.78 | 64.99 | 71.85 | 94.66 | 48.49 |
| Min                    | 65.39  | 83.2  | 91.75 | 60.87 | 67.43 | 82.75 | 44.58 |
| VAN 75+CHL 50+FOX 1    |        |       |       |       |       |       |       |
| Median (n=5)           | 75.51  | 85    | 80    | 62.86 | 50.14 | 27.93 | 24.15 |
| Max                    | 85     | 92.47 | 82.5  | 67.63 | 58.29 | 29.34 | 31.5  |
| Min                    | 65.39  | 83.2  | 71.26 | 57.31 | 41.94 | 20.18 | 19.34 |
| VAN 75+CHL 50+ERY 30   |        |       |       |       |       |       |       |
| Median (n=5)           | 75.51  | 85    | 90.41 | 62.86 | 58.66 | 66.45 | 60.34 |
| Max                    | 85     | 92.47 | 96.09 | 67.63 | 71.83 | 73.42 | 67.91 |
| Min                    | 65.39  | 83.2  | 87.1  | 57.31 | 52.55 | 59.05 | 52.52 |
| VAN 35+TMP 0.07+CLI 20 |        |       |       |       |       |       |       |
| Median (n=5)           | 105.69 | 85.68 | 76.21 | 11.01 | 66.68 | 26.53 | 0.88  |
| Max                    | 113.23 | 90.99 | 79.53 | 33.21 | 73.7  | 34.87 | 1.07  |
| Min                    | 97.41  | 75.51 | 74.35 | 3.78  | 64.55 | 9.73  | 0.82  |
| VAN 35+TMP 0.07+STR 2  |        |       |       |       |       |       |       |
| Median (n=5)           | 105.69 | 85.68 | 72.56 | 11.01 | 70.59 | 57.46 | 10.32 |

|                          |        |        |       |       |        |       |       |
|--------------------------|--------|--------|-------|-------|--------|-------|-------|
| Max                      | 113.23 | 90.99  | 73.65 | 33.21 | 83.81  | 60.92 | 30.03 |
| Min                      | 97.41  | 75.51  | 68.06 | 3.78  | 63.29  | 50.52 | 8.71  |
| VAN 35+TMP 0.07+TOB 0.5  |        |        |       |       |        |       |       |
| Median (n=5)             | 105.69 | 85.68  | 81.78 | 11.01 | 92.07  | 78.5  | 30.99 |
| Max                      | 113.23 | 90.99  | 85.04 | 33.21 | 110.94 | 82.68 | 36.25 |
| Min                      | 97.41  | 75.51  | 76.93 | 3.78  | 82.04  | 58.28 | 29.26 |
| VAN 35+CHL 50+TMP 0.07   |        |        |       |       |        |       |       |
| Median (n=5)             | 105.69 | 86.15  | 85.68 | 92.41 | 11.01  | 77.65 | 51.9  |
| Max                      | 113.23 | 90.39  | 90.99 | 97.52 | 33.21  | 86.54 | 53.04 |
| Min                      | 97.41  | 84.15  | 75.51 | 75.94 | 3.78   | 74.6  | 48.67 |
| VAN 35+TMP 0.07+NTR 1    |        |        |       |       |        |       |       |
| Median (n=7)             | 91.49  | 60.26  | 91.36 | 13.27 | 80.99  | 38.55 | 9.52  |
| Max                      | 100.11 | 107.32 | 93.49 | 54.64 | 83.03  | 79.66 | 59.26 |
| Min                      | 86.99  | 51.47  | 85.94 | 5.27  | 72.89  | 18.53 | 0.71  |
| VAN 35+TMP 0.07+CPR 0.01 |        |        |       |       |        |       |       |
| Median (n=5)             | 88.85  | 59.16  | 86    | 7.65  | 70.78  | 37.3  | 6.32  |
| Max                      | 91.49  | 60.97  | 93.63 | 26.58 | 74.27  | 41.84 | 16.88 |
| Min                      | 80.99  | 51.47  | 80.31 | 3.17  | 62.09  | 34.06 | 0.76  |
| VAN 35+TMP 0.07+FOX 1    |        |        |       |       |        |       |       |

|                          |        |        |        |        |        |        |        |
|--------------------------|--------|--------|--------|--------|--------|--------|--------|
| Median (n=8)             | 87.92  | 60.615 | 67.31  | 8.425  | 56.35  | 31.415 | 1.075  |
| Max                      | 95.75  | 75.36  | 75.57  | 26.58  | 83.1   | 38.73  | 21.7   |
| Min                      | 74.9   | 51.47  | 54.62  | 1.78   | 38.84  | 19.76  | 0.81   |
| VAN 35+TMP 0.07+ERY 30   |        |        |        |        |        |        |        |
| Median (n=6)             | 87.92  | 59.71  | 82.225 | 10.92  | 62.425 | 40.935 | 10.94  |
| Max                      | 91.49  | 62.21  | 89.47  | 13.56  | 88.63  | 55.07  | 15.51  |
| Min                      | 79.11  | 51.47  | 75.6   | 1.77   | 50.33  | 27.13  | 6.29   |
| CHL 40+TMP 0.07+AMP 1.2  |        |        |        |        |        |        |        |
| Median (n=3)             | 76.21  | 72.76  | 75.12  | 72.67  | 73.84  | 0.69   | 0.97   |
| Max                      | 77.2   | 78.48  | 80.58  | 75.19  | 86.14  | 56.62  | 44.57  |
| Min                      | 75.13  | 71.6   | 71.15  | 57.72  | 52.89  | 0.58   | 0.92   |
| CHL 40+TMP 0.07+CPR 9    |        |        |        |        |        |        |        |
| Median (n=2)             | 76.705 | 72.18  | 81.835 | 65.195 | 64.085 | 0.925  | 31.835 |
| Max                      | 77.2   | 72.76  | 82.88  | 72.67  | 67.37  | 0.93   | 62.96  |
| Min                      | 76.21  | 71.6   | 80.79  | 57.72  | 60.8   | 0.92   | 0.71   |
| CHL 40+TMP 0.07+CLI 17.5 |        |        |        |        |        |        |        |
| Median (n=3)             | 76.21  | 71.6   | 76.74  | 57.72  | 69.09  | 12.96  | 19.82  |
| Max                      | 77.2   | 72.76  | 79.34  | 72.67  | 81.72  | 29.56  | 43.53  |
| Min                      | 68.07  | 59.61  | 75.55  | 49.44  | 69.06  | 11.68  | 2.87   |

|                         |       |        |       |        |        |        |       |
|-------------------------|-------|--------|-------|--------|--------|--------|-------|
| CHL 40+TMP 0.06+ERY 18  |       |        |       |        |        |        |       |
| Median (n=3)            | 71.24 | 68.22  | 78.03 | 66.12  | 67.73  | 57.06  | 52.74 |
| Max                     | 77.13 | 78.06  | 79.92 | 82.51  | 82.94  | 79.46  | 61.12 |
| Min                     | 64.88 | 62.23  | 77.05 | 64.67  | 62.08  | 48.05  | 47.35 |
| CHL 40+TMP 0.06+FOX 0.9 |       |        |       |        |        |        |       |
| Median (n=3)            | 71.24 | 68.22  | 66.98 | 66.12  | 49.92  | 25.52  | 24.9  |
| Max                     | 77.13 | 78.06  | 71.74 | 82.51  | 69.67  | 45.27  | 34.95 |
| Min                     | 64.88 | 62.23  | 63.72 | 64.67  | 48.51  | 14.42  | 24.68 |
| CHL 40+TMP 0.06+STR 2.3 |       |        |       |        |        |        |       |
| Median (n=3)            | 71.24 | 68.22  | 66.96 | 66.12  | 54.27  | 46.72  | 37.12 |
| Max                     | 77.13 | 78.06  | 79.65 | 82.51  | 76.38  | 77.58  | 45.31 |
| Min                     | 64.88 | 62.23  | 65.81 | 64.67  | 53.87  | 10.77  | 4.71  |
| CHL 40+TMP 0.08+TOB 0.5 |       |        |       |        |        |        |       |
| Median (n=2)            | 83.77 | 83.77  | 83.77 | 83.77  | 83.77  | 83.77  | 83.77 |
| Max                     | 85.36 | 85.36  | 85.36 | 85.36  | 85.36  | 85.36  | 85.36 |
| Min                     | 82.18 | 82.18  | 82.18 | 82.18  | 82.18  | 82.18  | 82.18 |
| CHL 40+TMP 0.06+NTR 1   |       |        |       |        |        |        |       |
| Median (n=4)            | 72.38 | 80.495 | 64.11 | 72.92  | 61.855 | 61.625 | 66.12 |
| Max                     | 75.13 | 89.19  | 76.52 | 102.93 | 67.67  | 93.86  | 72.07 |

|                         |        |       |        |        |        |        |        |
|-------------------------|--------|-------|--------|--------|--------|--------|--------|
| Min                     | 71.14  | 76.62 | 60.43  | 70.65  | 48.09  | 59.3   | 61.01  |
| CHL 40+AMP 1.3+CPR 9    |        |       |        |        |        |        |        |
| Median (n=3)            | 81.99  | 80.58 | 69.18  | 82.07  | 58.86  | 35.72  | 48.46  |
| Max                     | 89.11  | 81.87 | 84.26  | 86.14  | 70.15  | 40.22  | 67.32  |
| Min                     | 75.13  | 66.01 | 65.97  | 75.22  | 58.63  | 0.22   | 15.86  |
| CHL 40+AMP 1.3+CLI 17.5 |        |       |        |        |        |        |        |
| Median (n=3)            | 76.21  | 75.12 | 75.55  | 73.84  | 74.79  | 30.24  | 61.96  |
| Max                     | 77.2   | 79.2  | 76.74  | 84.62  | 81.72  | 78.16  | 71.78  |
| Min                     | 72.01  | 71.15 | 65.44  | 52.89  | 69.09  | 16.15  | 8.83   |
| CHL 40+AMP 1.3+ERY 18   |        |       |        |        |        |        |        |
| Median (n=3)            | 69.66  | 69.15 | 70.98  | 79.22  | 62.3   | 86.58  | 59.64  |
| Max                     | 81.62  | 86.97 | 89.23  | 94.52  | 71.45  | 88.29  | 72.99  |
| Min                     | 65.52  | 65.43 | 66.45  | 61.17  | 36.87  | 78.02  | 49.18  |
| CHL 40+AMP 1.3+FOX 0.9  |        |       |        |        |        |        |        |
| Median (n=2)            | 75.475 | 96.71 | 86.965 | 71.29  | 54.28  | 53.38  | 26.765 |
| Max                     | 76.72  | 98.65 | 95.07  | 71.48  | 59.06  | 61.25  | 30.53  |
| Min                     | 74.23  | 94.77 | 78.86  | 71.1   | 49.5   | 45.51  | 23     |
| CHL 40+AMP 1.3+STR 2.3  |        |       |        |        |        |        |        |
| Median (n=2)            | 75.64  | 76.2  | 71.455 | 77.845 | 56.625 | 52.295 | 46.105 |

|                        |        |       |       |       |        |       |        |
|------------------------|--------|-------|-------|-------|--------|-------|--------|
| Max                    | 81.62  | 86.97 | 77.06 | 94.52 | 65.25  | 60.13 | 58.49  |
| Min                    | 69.66  | 65.43 | 65.85 | 61.17 | 48     | 44.46 | 33.72  |
| CHL 40+AMP 1.3+TOB 0.6 |        |       |       |       |        |       |        |
| Median (n=3)           | 69.66  | 69.15 | 81.78 | 79.22 | 50.93  | 44.97 | 71     |
| Max                    | 81.62  | 86.97 | 85.53 | 94.52 | 66.46  | 62.56 | 74.52  |
| Min                    | 65.52  | 65.43 | 70.65 | 61.17 | 41.72  | 44.82 | 47.19  |
| CHL 40+AMP 1.3+NTR 1   |        |       |       |       |        |       |        |
| Median (n=5)           | 75.13  | 69.15 | 66.99 | 79.22 | 66.78  | 46.83 | 51.37  |
| Max                    | 89.11  | 86.97 | 73.33 | 94.52 | 86.76  | 55.76 | 62.65  |
| Min                    | 65.52  | 65.43 | 65.66 | 61.17 | 43.48  | 43.49 | 39.08  |
| CHL 40+CPR 9+CLI 17.5  |        |       |       |       |        |       |        |
| Median (n=3)           | 76.21  | 80.79 | 76.74 | 63.83 | 69.09  | 19.56 | 43.21  |
| Max                    | 77.2   | 82.88 | 79.34 | 67.37 | 81.72  | 28.69 | 66.28  |
| Min                    | 68.07  | 61.53 | 75.55 | 60.8  | 69.06  | 11.25 | 28.36  |
| CHL 38+CPR 8+ERY 18    |        |       |       |       |        |       |        |
| Median (n=4)           | 77.205 | 74.83 | 78.64 | 66.86 | 63.785 | 68.51 | 63.135 |
| Max                    | 84.62  | 87.69 | 83.07 | 77.42 | 71.12  | 79.07 | 74.1   |
| Min                    | 71.14  | 67.55 | 75.43 | 20.44 | 34.29  | 36.72 | 27.86  |
| CHL 40+CPR 12+FOX 0.9  |        |       |       |       |        |       |        |

|                        |       |        |        |       |       |       |       |
|------------------------|-------|--------|--------|-------|-------|-------|-------|
| Median (n=3)           | 69.48 | 66.51  | 83.72  | 59.53 | 54.63 | 19.53 | 28.93 |
| Max                    | 71.47 | 68.72  | 86.3   | 79.09 | 60.68 | 20.48 | 35.4  |
| Min                    | 66.94 | 59.25  | 61.4   | 47.77 | 46.58 | 2.18  | 24.9  |
| CHL 38+CPR 8+STR 2.3   |       |        |        |       |       |       |       |
| Median (n=3)           | 72.82 | 85.19  | 76.05  | 72.04 | 70.82 | 62.09 | 58.2  |
| Max                    | 76.9  | 89.95  | 93.93  | 76.2  | 82.66 | 69.27 | 72.31 |
| Min                    | 65.19 | 71.02  | 61.85  | 70.84 | 59.87 | 55.71 | 56.99 |
| CHL 40+CPR 12+TOB 0.5  |       |        |        |       |       |       |       |
| Median (n=3)           | 69.7  | 66.38  | 85.22  | 74.69 | 65.86 | 57.22 | 59.47 |
| Max                    | 72.78 | 83.06  | 86.26  | 79.73 | 68.15 | 57.76 | 66.81 |
| Min                    | 66.94 | 59.25  | 68.15  | 47.77 | 65.44 | 6.49  | 46.07 |
| CHL 40+CPR 12+NTR 1    |       |        |        |       |       |       |       |
| Median (n=2)           | 68.32 | 62.815 | 76.495 | 61.23 | 64.36 | 69.24 | 51.48 |
| Max                    | 69.7  | 66.38  | 80.15  | 74.69 | 66.28 | 75.45 | 58.86 |
| Min                    | 66.94 | 59.25  | 72.84  | 47.77 | 62.44 | 63.03 | 44.1  |
| CHL 40+CLI 17.5+ERY 18 |       |        |        |       |       |       |       |
| Median (n=3)           | 82.18 | 83.12  | 79.82  | 68.68 | 66.29 | 61.22 | 55.8  |
| Max                    | 85.36 | 88.93  | 85.43  | 76    | 80.66 | 69.5  | 71.34 |
| Min                    | 74.23 | 76.7   | 75.26  | 52.96 | 64.6  | 36.37 | 37.1  |



|                         |        |        |        |        |        |        |       |
|-------------------------|--------|--------|--------|--------|--------|--------|-------|
| CHL 40+CLI 17.5+FOX 0.9 |        |        |        |        |        |        |       |
| Median (n=2)            | 75.475 | 82.845 | 86.965 | 54.28  | 68.775 | 53.895 | 44.34 |
| Max                     | 76.72  | 83.12  | 95.07  | 59.06  | 68.87  | 56.58  | 52.39 |
| Min                     | 74.23  | 82.57  | 78.86  | 49.5   | 68.68  | 51.21  | 36.29 |
| CHL 38+STR 2.3+CLI 17.5 |        |        |        |        |        |        |       |
| Median (n=3)            | 73.82  | 79.52  | 69.53  | 59.96  | 69.69  | 78.01  | 68.61 |
| Max                     | 78.89  | 93.93  | 90.84  | 83.47  | 71.59  | 78.64  | 72.3  |
| Min                     | 65.19  | 68.39  | 67.73  | 59.87  | 52.31  | 66.55  | 59.8  |
| CHL 38+TOB 0.5+CLI 17.5 |        |        |        |        |        |        |       |
| Median (n=3)            | 78.89  | 81.17  | 69.53  | 82.15  | 67.84  | 77.74  | 78.88 |
| Max                     | 95.28  | 83.59  | 89.9   | 90.27  | 85.73  | 78.64  | 93.69 |
| Min                     | 73.82  | 67.47  | 67.73  | 79.56  | 60.42  | 66.55  | 72.93 |
| CHL 40+CLI 17.5+NTR 1   |        |        |        |        |        |        |       |
| Median (n=2)            | 78.56  | 79.23  | 60.23  | 59.255 | 70.29  | 42.135 | 40.72 |
| Max                     | 81.99  | 84.33  | 65.66  | 70.68  | 75.3   | 46.14  | 45.58 |
| Min                     | 75.13  | 74.13  | 54.8   | 47.83  | 65.28  | 38.13  | 35.86 |
| CHL 40+ERY 18+FOX 0.9   |        |        |        |        |        |        |       |
| Median (n=3)            | 71.24  | 78.03  | 66.98  | 67.73  | 49.92  | 46.42  | 22.12 |
| Max                     | 77.13  | 79.92  | 71.74  | 82.94  | 69.67  | 59.78  | 22.74 |

|                        |        |       |       |        |       |        |       |
|------------------------|--------|-------|-------|--------|-------|--------|-------|
| Min                    | 64.88  | 77.05 | 63.72 | 62.08  | 48.51 | 32.09  | 19.59 |
| CHL 40+ERY 18+STR 2.3  |        |       |       |        |       |        |       |
| Median (n=3)           | 71.24  | 78.03 | 66.96 | 67.73  | 54.27 | 67.24  | 58.55 |
| Max                    | 77.13  | 79.92 | 79.65 | 82.94  | 76.38 | 73.95  | 66.49 |
| Min                    | 64.88  | 77.05 | 65.81 | 62.08  | 53.87 | 60.23  | 34.92 |
| CHL 40+ERY 18+TOB 0.6  |        |       |       |        |       |        |       |
| Median (n=3)           | 69.66  | 70.98 | 81.78 | 50.93  | 62.3  | 79.19  | 57.2  |
| Max                    | 81.62  | 89.23 | 85.53 | 71.45  | 66.46 | 83.78  | 61.79 |
| Min                    | 65.52  | 66.45 | 70.65 | 41.72  | 36.87 | 72.64  | 50.8  |
| CHL 40+ERY 18+NTR 1    |        |       |       |        |       |        |       |
| Median (n=4)           | 70.905 | 74.5  | 67.75 | 66.875 | 69.82 | 65.07  | 66.14 |
| Max                    | 81.62  | 89.23 | 73.74 | 76.03  | 86.76 | 69.66  | 68.13 |
| Min                    | 65.52  | 66.45 | 65.7  | 36.87  | 66.78 | 55.13  | 57.19 |
| CHL 40+FOX 0.9+STR 2.3 |        |       |       |        |       |        |       |
| Median (n=3)           | 71.24  | 66.98 | 66.96 | 49.92  | 54.27 | 19.75  | 33.36 |
| Max                    | 77.13  | 71.74 | 79.65 | 69.67  | 76.38 | 28.02  | 62.67 |
| Min                    | 64.88  | 63.72 | 65.81 | 48.51  | 53.87 | 18.24  | 24.34 |
| CHL 40+FOX 0.9+TOB 0.5 |        |       |       |        |       |        |       |
| Median (n=2)           | 68.21  | 73.85 | 82.41 | 53.63  | 69.06 | 54.915 | 40.48 |

|                        |       |       |        |       |       |       |        |
|------------------------|-------|-------|--------|-------|-------|-------|--------|
| Max                    | 69.48 | 86.3  | 85.22  | 60.68 | 69.97 | 81.63 | 42.53  |
| Min                    | 66.94 | 61.4  | 79.6   | 46.58 | 68.15 | 28.2  | 38.43  |
| CHL 38+FOX 0.9+NTR 1   |       |       |        |       |       |       |        |
| Median (n=3)           | 74.29 | 68.53 | 69.85  | 59.16 | 61.28 | 63.05 | 66.5   |
| Max                    | 78.61 | 90.52 | 89.97  | 61.5  | 79.33 | 76.48 | 67.79  |
| Min                    | 72.82 | 64.17 | 60.18  | 50.67 | 58.93 | 55.35 | 52.09  |
| CHL 38+STR 2.3+TOB 0.5 |       |       |        |       |       |       |        |
| Median (n=3)           | 74.74 | 73.18 | 71.46  | 71.69 | 45.91 | 69.43 | 45.54  |
| Max                    | 78.61 | 76.34 | 72.87  | 71.87 | 56.38 | 71.95 | 66.95  |
| Min                    | 74.29 | 63.1  | 67.24  | 67.78 | 42.5  | 43.61 | 34.89  |
| CHL 38+STR 2.3+NTR 1   |       |       |        |       |       |       |        |
| Median (n=2)           | 76.45 | 74.76 | 75.075 | 71.78 | 69.13 | 54.09 | 56.055 |
| Max                    | 78.61 | 76.34 | 89.97  | 71.87 | 79.33 | 55.8  | 62.52  |
| Min                    | 74.29 | 73.18 | 60.18  | 71.69 | 58.93 | 52.38 | 49.59  |
| CHL 40+NTR 1+TOB 0.5   |       |       |        |       |       |       |        |
| Median (n=3)           | 69.7  | 72.84 | 81.03  | 66.28 | 65.86 | 56.71 | 51.97  |
| Max                    | 87.49 | 80.15 | 85.22  | 71.75 | 68.15 | 69.51 | 60.97  |
| Min                    | 66.94 | 71.15 | 68.15  | 62.44 | 43.94 | 1.41  | 5.56   |
| TMP 0.07+AMP 1.2+CPR 9 |       |       |        |       |       |       |        |

|                           |        |        |        |       |        |        |       |
|---------------------------|--------|--------|--------|-------|--------|--------|-------|
| Median (n=3)              | 65.96  | 76.79  | 74     | 17.68 | 18.83  | 41.03  | 1.09  |
| Max                       | 77.51  | 78     | 76.23  | 18.59 | 23.59  | 50     | 1.11  |
| Min                       | 64.8   | 72.24  | 71.25  | 16.76 | 8.21   | 38.71  | 1.04  |
| TMP 0.07+AMP 1.2+CLI 17.5 |        |        |        |       |        |        |       |
| Median (n=4)              | 65.38  | 77.395 | 72.665 | 17.22 | 30.775 | 35.015 | 6.52  |
| Max                       | 77.51  | 81.94  | 75.19  | 18.59 | 35.72  | 42.93  | 18.05 |
| Min                       | 63.42  | 72.24  | 69.08  | 1.82  | 25.92  | 30.49  | 1.6   |
| TMP 0.07+AMP 1.2+ERY 18   |        |        |        |       |        |        |       |
| Median (n=3)              | 65.96  | 76.79  | 68.79  | 17.68 | 62     | 82.43  | 23.68 |
| Max                       | 77.51  | 78     | 80.37  | 18.59 | 67.55  | 92.06  | 28.93 |
| Min                       | 64.8   | 72.24  | 65.82  | 16.76 | 60.32  | 78.21  | 22.78 |
| TMP 0.08+AMP 1.1+FOX 0.9  |        |        |        |       |        |        |       |
| Median (n=2)              | 63.535 | 81.975 | 85.85  | 2.495 | 27.76  | 37.815 | 1.12  |
| Max                       | 66.4   | 90.64  | 92.74  | 3.61  | 31.46  | 42.44  | 1.17  |
| Min                       | 60.67  | 73.31  | 78.96  | 1.38  | 24.06  | 33.19  | 1.07  |
| TMP 0.08+AMP 1.1+STR 2.3  |        |        |        |       |        |        |       |
| Median (n=2)              | 63.535 | 81.975 | 80.905 | 2.495 | 28.55  | 26.395 | 1.38  |
| Max                       | 66.4   | 90.64  | 89.81  | 3.61  | 31.29  | 26.48  | 1.79  |
| Min                       | 60.67  | 73.31  | 72     | 1.38  | 25.81  | 26.31  | 0.97  |

|                          |        |        |        |       |       |        |        |
|--------------------------|--------|--------|--------|-------|-------|--------|--------|
| TMP 0.07+AMP 1.2+TOB 0.6 |        |        |        |       |       |        |        |
| Median (n=2)             | 68.565 | 70.995 | 68.08  | 13.35 | 31.56 | 75.49  | 1.185  |
| Max                      | 71.17  | 76.79  | 73.05  | 18.59 | 39.28 | 83.44  | 1.36   |
| Min                      | 65.96  | 65.2   | 63.11  | 8.11  | 23.84 | 67.54  | 1.01   |
| TMP 0.08+AMP 1.1+NTR 1   |        |        |        |       |       |        |        |
| Median (n=2)             | 63.535 | 81.975 | 74.395 | 2.495 | 75.68 | 63.465 | 3.39   |
| Max                      | 66.4   | 90.64  | 78.25  | 3.61  | 81.46 | 67.63  | 3.48   |
| Min                      | 60.67  | 73.31  | 70.54  | 1.38  | 69.9  | 59.3   | 3.3    |
| TMP 0.08+CPR 9+CLI 17.5  |        |        |        |       |       |        |        |
| Median (n=3)             | 66.5   | 68.41  | 74.37  | 8.21  | 24.86 | 29.89  | 1.41   |
| Max                      | 77.51  | 74     | 75.19  | 14.08 | 25.92 | 37.94  | 8.19   |
| Min                      | 62.51  | 65.42  | 73.39  | 1.32  | 23.24 | 19.18  | 0.86   |
| TMP 0.08+CPR 9+ERY 18    |        |        |        |       |       |        |        |
| Median (n=2)             | 72.005 | 71.205 | 77.775 | 4.765 | 55.47 | 88.995 | 18.175 |
| Max                      | 77.51  | 74     | 86.76  | 8.21  | 67.55 | 100.14 | 23.06  |
| Min                      | 66.5   | 68.41  | 68.79  | 1.32  | 43.39 | 77.85  | 13.29  |
| TMP 0.07+CPR 9+FOX 0.9   |        |        |        |       |       |        |        |
| Median (n=2)             | 61.1   | 73.805 | 82.09  | 14.41 | 25.47 | 13.635 | 2.73   |
| Max                      | 65.2   | 79.21  | 82.28  | 14.7  | 26.5  | 14.1   | 3.8    |

|                           |       |       |        |       |       |       |       |
|---------------------------|-------|-------|--------|-------|-------|-------|-------|
| Min                       | 57    | 68.4  | 81.9   | 14.12 | 24.44 | 13.17 | 1.66  |
| TMP 0.08+CPR 9+STR 2.3    |       |       |        |       |       |       |       |
| Median (n=2)              | 72.32 | 69.64 | 71.695 | 7.935 | 3.455 | 2.225 | 0.885 |
| Max                       | 79.44 | 70.88 | 71.7   | 14.7  | 6.41  | 3.3   | 1.17  |
| Min                       | 65.2  | 68.4  | 71.69  | 1.17  | 0.5   | 1.15  | 0.6   |
| TMP 0.08+CPR 9+TOB 0.6    |       |       |        |       |       |       |       |
| Median (n=2)              | 66.55 | 73.25 | 73     | 57.9  | 7.3   | 8.6   | 0.35  |
| Max                       | 68.7  | 78.7  | 77.8   | 57.9  | 14.3  | 16.9  | 0.5   |
| Min                       | 64.4  | 67.8  | 68.2   | 57.9  | 0.3   | 0.3   | 0.2   |
| TMP 0.08+CPR 9+NTR 1      |       |       |        |       |       |       |       |
| Median (n=3)              | 64.4  | 67.8  | 69.2   | 57.9  | 73.9  | 68.2  | 58.8  |
| Max                       | 68.7  | 78.7  | 81.4   | 57.9  | 80.3  | 86.3  | 65.1  |
| Min                       | 59.66 | 63.79 | 66.7   | 15.13 | 73.54 | 66.79 | 49.42 |
| TMP 0.08+CLI 17.5+ERY 18  |       |       |        |       |       |       |       |
| Median (n=3)              | 63.42 | 73.39 | 76.87  | 26.79 | 34.23 | 64.81 | 13.54 |
| Max                       | 66.5  | 78.91 | 86.76  | 43.39 | 46.8  | 69.96 | 16.21 |
| Min                       | 59.95 | 69.08 | 75.77  | 23.19 | 23.24 | 59.1  | 13.08 |
| TMP 0.07+CLI 17.5+FOX 0.9 |       |       |        |       |       |       |       |
| Median (n=3)              | 65.2  | 69.93 | 71.15  | 27.7  | 26.5  | 34.2  | 27.2  |

|                           |        |        |        |        |        |        |       |
|---------------------------|--------|--------|--------|--------|--------|--------|-------|
| Max                       | 71.26  | 83.5   | 81.9   | 31.4   | 30.5   | 34.5   | 27.7  |
| Min                       | 51.5   | 67.9   | 70.2   | 24.42  | 14.27  | 25.82  | 20.66 |
| TMP 0.07+CLI 17.5+STR 2.3 |        |        |        |        |        |        |       |
| Median (n=2)              | 72.1   | 71.8   | 66.7   | 53     | 0.7    | 59.95  | 13.85 |
| Max                       | 72.7   | 81.3   | 67.2   | 62.1   | 0.9    | 65.6   | 15.7  |
| Min                       | 71.5   | 62.3   | 66.2   | 43.9   | 0.5    | 54.3   | 12    |
| TMP 0.08+CLI 17.5+TOB 0.6 |        |        |        |        |        |        |       |
| Median (n=2)              | 68.5   | 64.37  | 62.285 | 33.61  | 0.925  | 1.225  | 0.925 |
| Max                       | 69     | 65.44  | 64.4   | 66.1   | 1.25   | 1.45   | 1.25  |
| Min                       | 68     | 63.3   | 60.17  | 1.12   | 0.6    | 1      | 0.6   |
| TMP 0.08+CLI 17.5+NTR 1   |        |        |        |        |        |        |       |
| Median (n=2)              | 63.71  | 69.125 | 71.355 | 31.835 | 64.275 | 61.95  | 45.48 |
| Max                       | 64.64  | 72.23  | 75.07  | 33.25  | 66.39  | 63.74  | 45.54 |
| Min                       | 62.78  | 66.02  | 67.64  | 30.42  | 62.16  | 60.16  | 45.42 |
| TMP 0.07+ERY 18+FOX 0.9   |        |        |        |        |        |        |       |
| Median (n=2)              | 65.145 | 78.595 | 70.645 | 28.79  | 13.1   | 65.225 | 16.14 |
| Max                       | 65.65  | 83.75  | 79.96  | 48.62  | 20.7   | 67.75  | 31.48 |
| Min                       | 64.64  | 73.44  | 61.33  | 8.96   | 5.5    | 62.7   | 0.8   |
| TMP 0.07+ERY 18+STR 2.3   |        |        |        |        |        |        |       |

|                          |        |       |        |        |       |        |        |
|--------------------------|--------|-------|--------|--------|-------|--------|--------|
| Median (n=3)             | 71.5   | 89.7  | 67.2   | 64.5   | 0.9   | 59.9   | 37.1   |
| Max                      | 72.7   | 89.73 | 69.58  | 69.1   | 0.94  | 66     | 39.8   |
| Min                      | 68.28  | 74.9  | 66.2   | 64.31  | 0.5   | 59.3   | 30.23  |
| TMP 0.07+ERY 18+TOB 0.6  |        |       |        |        |       |        |        |
| Median (n=2)             | 66.965 | 86.74 | 69.815 | 36.635 | 0.75  | 72.33  | 29.945 |
| Max                      | 68.28  | 89.73 | 75.19  | 64.31  | 0.79  | 74.34  | 37     |
| Min                      | 65.65  | 83.75 | 64.44  | 8.96   | 0.71  | 70.32  | 22.89  |
| TMP 0.08+ERY 18+NTR 1    |        |       |        |        |       |        |        |
| Median (n=2)             | 67.325 | 80.25 | 57.25  | 5.1    | 31.78 | 46.375 | 1.495  |
| Max                      | 69     | 83.75 | 62.61  | 8.96   | 46.91 | 54.51  | 1.71   |
| Min                      | 65.65  | 76.75 | 51.89  | 1.24   | 16.65 | 38.24  | 1.28   |
| TMP 0.08+FOX 0.9+STR 2.3 |        |       |        |        |       |        |        |
| Median (n=2)             | 63.535 | 85.85 | 80.905 | 27.76  | 28.55 | 21.735 | 2.525  |
| Max                      | 66.4   | 92.74 | 89.81  | 31.46  | 31.29 | 30.55  | 3.91   |
| Min                      | 60.67  | 78.96 | 72     | 24.06  | 25.81 | 12.92  | 1.14   |
| TMP 0.07+FOX 0.9+TOB 0.6 |        |       |        |        |       |        |        |
| Median (n=3)             | 69.02  | 75.22 | 63.11  | 0.79   | 23.84 | 37.43  | 0.92   |
| Max                      | 71.17  | 77.35 | 75.19  | 19.3   | 40.18 | 57.54  | 1.14   |
| Min                      | 68.28  | 72.62 | 60.97  | 0.67   | 17.33 | 35.39  | 0.89   |



|                                 |        |        |        |       |       |       |       |
|---------------------------------|--------|--------|--------|-------|-------|-------|-------|
| <b>TMP 0.08+NTR 1+FOX 0.9</b>   |        |        |        |       |       |       |       |
| Median (n=3)                    | 66.4   | 78.25  | 82.82  | 31.46 | 69.9  | 85.42 | 40.95 |
| Max                             | 77.27  | 88.21  | 92.74  | 89.07 | 81.46 | 92.77 | 75.27 |
| Min                             | 60.67  | 70.54  | 78.96  | 24.06 | 49.99 | 60.77 | 18.8  |
| <b>TMP 0.08+TOB 0.6+NTR 1</b>   |        |        |        |       |       |       |       |
| Median (n=3)                    | 68.7   | 68.38  | 67.64  | 16.65 | 1.52  | 10    | 1.48  |
| Max                             | 69     | 77.8   | 81.4   | 62.16 | 73.9  | 12.26 | 1.49  |
| Min                             | 64.64  | 60.17  | 62.61  | 0.3   | 1.25  | 1.22  | 0.5   |
| <b>TMP 0.07+STR 2.3+TOB 0.6</b> |        |        |        |       |       |       |       |
| Median (n=3)                    | 68.28  | 67.2   | 64.44  | 0.71  | 0.73  | 0.86  | 0.91  |
| Max                             | 72.7   | 69.58  | 75.19  | 0.94  | 0.79  | 1.72  | 2.2   |
| Min                             | 65.65  | 60.76  | 63.7   | 0.5   | 0.5   | 0.6   | 0.83  |
| <b>TMP 0.08+STR 2.3+NTR 1</b>   |        |        |        |       |       |       |       |
| Median (n=2)                    | 63.535 | 80.905 | 74.395 | 75.68 | 28.55 | 31.97 | 8.85  |
| Max                             | 66.4   | 89.81  | 78.25  | 81.46 | 31.29 | 37.51 | 12.51 |
| Min                             | 60.67  | 72     | 70.54  | 69.9  | 25.81 | 26.43 | 5.19  |
| <b>VAN 75+CPR 0.01+ERY 30</b>   |        |        |        |       |       |       |       |
| Median (n=3)                    | 83.31  | 88.08  | 89.03  | 61.05 | 79.1  | 81.37 | 36.53 |
| Max                             | 93.13  | 92.27  | 95.02  | 62.8  | 82.63 | 88.38 | 40.69 |

|                         |       |       |       |       |       |       |       |
|-------------------------|-------|-------|-------|-------|-------|-------|-------|
| Min                     | 75.25 | 86.41 | 76.46 | 56.32 | 59.2  | 73.69 | 30.86 |
| VAN 75+CPR 0.01+GEN 0.4 |       |       |       |       |       |       |       |
| Median (n=3)            | 83.31 | 88.08 | 79.17 | 61.05 | 70.24 | 63.05 | 8.31  |
| Max                     | 93.13 | 92.27 | 81.79 | 62.8  | 82.07 | 67.18 | 11.88 |
| Min                     | 75.25 | 86.41 | 71.96 | 56.32 | 39.34 | 61.08 | 7.35  |
| VAN 75+CPR 0.01+FOX 1   |       |       |       |       |       |       |       |
| Median (n=3)            | 83.31 | 88.08 | 76.77 | 61.05 | 67.13 | 58.5  | 18.83 |
| Max                     | 93.13 | 92.27 | 78.12 | 62.8  | 75.85 | 58.97 | 28.93 |
| Min                     | 75.25 | 86.41 | 64.02 | 56.32 | 58.46 | 47.92 | 13.64 |
| VAN 75+CPR 0.01+TOB 0.5 |       |       |       |       |       |       |       |
| Median (n=3)            | 83.31 | 88.08 | 82.74 | 61.05 | 78.46 | 76.33 | 22.64 |
| Max                     | 93.13 | 92.27 | 87.96 | 62.8  | 84.88 | 79.24 | 34.21 |
| Min                     | 75.25 | 86.41 | 76.12 | 56.32 | 60.24 | 76.23 | 11.98 |
| VAN 75+CPR 0.01+STR 2   |       |       |       |       |       |       |       |
| Median (n=3)            | 83.31 | 88.08 | 72.97 | 61.05 | 63.44 | 74.71 | 12.11 |
| Max                     | 93.13 | 92.27 | 77.72 | 62.8  | 72.16 | 75.51 | 15.7  |
| Min                     | 75.25 | 86.41 | 68.29 | 56.32 | 55.94 | 68.41 | 8     |
| VAN 75+CPR 0.01+CLI 20  |       |       |       |       |       |       |       |
| Median (n=7)            | 90.4  | 85.92 | 77.38 | 43.5  | 42.69 | 45.66 | 0.97  |

|                       |       |       |       |       |       |       |       |
|-----------------------|-------|-------|-------|-------|-------|-------|-------|
| Max                   | 93.83 | 95.68 | 84.43 | 67.74 | 52.86 | 55.32 | 2.22  |
| Min                   | 73.95 | 78.09 | 69.23 | 22.21 | 38.05 | 19.78 | 0.5   |
| VAN 75+STR 2+TOB 0.5  |       |       |       |       |       |       |       |
| Median (n=3)          | 79.05 | 50    | 86.51 | 26.68 | 61.11 | 43.46 | 15.56 |
| Max                   | 90.4  | 50.91 | 86.65 | 34    | 61.18 | 45.18 | 22.27 |
| Min                   | 73.95 | 44.72 | 82.04 | 26.01 | 57.1  | 37.64 | 11.25 |
| VAN 75+STR 2+FOX 1    |       |       |       |       |       |       |       |
| Median (n=3)          | 79.05 | 50    | 73.09 | 26.68 | 61.61 | 9.54  | 6.97  |
| Max                   | 90.4  | 50.91 | 74.16 | 34    | 71.1  | 9.77  | 14.5  |
| Min                   | 73.95 | 44.72 | 65.75 | 26.01 | 57.77 | 9.48  | 5.18  |
| VAN 75+STR 2+ERY 30   |       |       |       |       |       |       |       |
| Median (n=5)          | 79.46 | 71.45 | 87.15 | 41.13 | 56.19 | 70.21 | 50.71 |
| Max                   | 93.83 | 78.13 | 93.06 | 54.38 | 73.75 | 90.16 | 68.49 |
| Min                   | 76.53 | 61.03 | 83.26 | 27.3  | 40.4  | 45.21 | 24.62 |
| VAN 75+STR 2+CLI 20   |       |       |       |       |       |       |       |
| Median (n=3)          | 79.05 | 50    | 75.34 | 26.68 | 47.37 | 53.71 | 15.26 |
| Max                   | 90.4  | 50.91 | 81.55 | 34    | 47.78 | 60.68 | 15.79 |
| Min                   | 73.95 | 44.72 | 69.23 | 26.01 | 42.67 | 51.64 | 12.73 |
| VAN 75+AMP 1+CPR 0.01 |       |       |       |       |       |       |       |

|                      |        |        |        |        |       |        |        |
|----------------------|--------|--------|--------|--------|-------|--------|--------|
| Median (n=5)         | 91.58  | 82.11  | 93.16  | 54.97  | 41.14 | 49.22  | 11.91  |
| Max                  | 93.83  | 87.96  | 95.68  | 63.28  | 67.74 | 60.23  | 16.16  |
| Min                  | 78.65  | 77.07  | 84.45  | 34.75  | 11.32 | 34.8   | 2.23   |
| VAN 75+AMP 1+STR 2   |        |        |        |        |       |        |        |
| Median (n=4)         | 79.055 | 78.485 | 72.19  | 55.4   | 45.39 | 23.965 | 19.725 |
| Max                  | 91.58  | 87.96  | 78.13  | 66.67  | 54.38 | 25.99  | 35.46  |
| Min                  | 76.53  | 67.09  | 61.03  | 34.75  | 29.1  | 13.23  | 14     |
| VAN 75+AMP 1+ERY 30  |        |        |        |        |       |        |        |
| Median (n=4)         | 85.52  | 83.75  | 88.145 | 51.245 | 49.85 | 39.275 | 12.78  |
| Max                  | 93.83  | 87.96  | 93.06  | 63.28  | 57.95 | 46.61  | 22.14  |
| Min                  | 78.65  | 77.07  | 84.78  | 34.75  | 40.4  | 31.04  | 9.67   |
| VAN 75+GEN 0.4+AMP 1 |        |        |        |        |       |        |        |
| Median (n=5)         | 87.2   | 83.5   | 85.7   | 49.73  | 43.96 | 26.33  | 21.94  |
| Max                  | 91.13  | 85.92  | 90.19  | 52.8   | 55.46 | 39.7   | 34.76  |
| Min                  | 78.65  | 71.8   | 77.07  | 29.08  | 34.75 | 15.52  | 19.17  |
| VAN 75+CHL 50+AMP 1  |        |        |        |        |       |        |        |
| Median (n=4)         | 89.165 | 86.27  | 87.085 | 75.59  | 44.71 | 52.815 | 11.685 |
| Max                  | 95.78  | 93.65  | 90.19  | 78.69  | 64.82 | 66.91  | 22.05  |
| Min                  | 77.02  | 80.27  | 78.51  | 65.33  | 43.96 | 46.65  | 5.49   |

|                        |        |       |        |        |        |        |        |
|------------------------|--------|-------|--------|--------|--------|--------|--------|
| VAN 75+CHL 50+NTR 1    |        |       |        |        |        |        |        |
| Median (n=2)           | 79.015 | 86.09 | 86.73  | 60.045 | 57.535 | 73.08  | 43.055 |
| Max                    | 81.01  | 88.77 | 89.97  | 65.33  | 60.19  | 75.39  | 43.95  |
| Min                    | 77.02  | 83.41 | 83.49  | 54.76  | 54.88  | 70.77  | 42.16  |
| VAN 75+CHL 50+CPR 0.01 |        |       |        |        |        |        |        |
| Median (n=4)           | 89.165 | 86.27 | 89.975 | 75.59  | 50.505 | 84.23  | 30.34  |
| Max                    | 95.78  | 93.65 | 91.85  | 78.69  | 52.75  | 90.5   | 38.09  |
| Min                    | 77.02  | 80.27 | 88.44  | 65.33  | 47.56  | 81.25  | 22.54  |
| VAN 75+CHL 50+STR 2    |        |       |        |        |        |        |        |
| Median (n=2)           | 79.015 | 86.09 | 71.18  | 60.045 | 39.64  | 71.135 | 42.335 |
| Max                    | 81.01  | 88.77 | 73.39  | 65.33  | 41.99  | 74.24  | 43.42  |
| Min                    | 77.02  | 83.41 | 68.97  | 54.76  | 37.29  | 68.03  | 41.25  |
| VAN 75+CHL 50+CLI 20   |        |       |        |        |        |        |        |
| Median (n=3)           | 91.13  | 83.77 | 84.4   | 77.88  | 45.38  | 77.97  | 64.22  |
| Max                    | 95.78  | 93.65 | 86.5   | 78.69  | 50.9   | 79.24  | 68.19  |
| Min                    | 87.2   | 80.27 | 78.73  | 73.3   | 43.17  | 77.32  | 58.27  |
| FUS 80+CPR 0.01+FOX 1  |        |       |        |        |        |        |        |
| Median (n=8)           | 67.565 | 84.81 | 68.725 | 56.495 | 30.345 | 56.99  | 19.295 |
| Max                    | 71.17  | 93.27 | 86.45  | 66.65  | 47.21  | 72.42  | 36.46  |

|                         |        |        |        |        |        |        |        |
|-------------------------|--------|--------|--------|--------|--------|--------|--------|
| Min                     | 50.14  | 77.19  | 63.14  | 50.21  | 17.32  | 28.07  | 4.05   |
| FUS 80+CPR 0.01+TOB 0.5 |        |        |        |        |        |        |        |
| Median (n=8)            | 67.565 | 84.81  | 72.78  | 56.495 | 28.795 | 65.66  | 1.365  |
| Max                     | 71.17  | 93.27  | 78.55  | 66.65  | 41.31  | 78.27  | 17.28  |
| Min                     | 50.14  | 77.19  | 59.75  | 50.21  | 8.63   | 43.17  | 0.44   |
| FUS 80+STR 1+FOX 1      |        |        |        |        |        |        |        |
| Median (n=3)            | 67.74  | 72.67  | 76.17  | 30.18  | 51.36  | 52.67  | 14.22  |
| Max                     | 69.25  | 87.74  | 86.45  | 30.51  | 52.32  | 53.13  | 15.52  |
| Min                     | 62.22  | 72.24  | 75.32  | 25.08  | 47.52  | 48.59  | 9.09   |
| FUS 80+STR 1+TOB 0.5    |        |        |        |        |        |        |        |
| Median (n=8)            | 67.565 | 67.63  | 72.78  | 28.795 | 44.795 | 42.275 | 8.1    |
| Max                     | 71.17  | 87.74  | 78.55  | 41.31  | 52.54  | 59.98  | 37.61  |
| Min                     | 50.14  | 59.17  | 59.75  | 8.63   | 31.95  | 30.28  | 0.46   |
| FUS 80+AMP 1.2+FOX 1    |        |        |        |        |        |        |        |
| Median (n=7)            | 67.74  | 72.16  | 72.75  | 30.51  | 0.78   | 20.71  | 0.7    |
| Max                     | 71.17  | 87.62  | 86.45  | 47.21  | 12.67  | 29.43  | 9.56   |
| Min                     | 55.47  | 52.04  | 63.29  | 17.32  | 0.49   | 18.31  | 0.43   |
| FUS 80+GEN 0.04+CHL 40  |        |        |        |        |        |        |        |
| Median (n=4)            | 90.215 | 81.415 | 84.265 | 50.175 | 62.03  | 71.31  | 43.215 |

|                         |        |        |        |        |        |        |        |
|-------------------------|--------|--------|--------|--------|--------|--------|--------|
| Max                     | 94.66  | 83.67  | 92.12  | 67.35  | 67.29  | 76.49  | 48.93  |
| Min                     | 86.78  | 80.57  | 75.65  | 28.45  | 54.69  | 65.53  | 35.9   |
| FUS 80+GEN 0.04+ERY 30  |        |        |        |        |        |        |        |
| Median (n=4)            | 88.9   | 81.415 | 79.145 | 49.615 | 38.555 | 60.695 | 39.145 |
| Max                     | 94.66  | 83.67  | 89.67  | 67.35  | 51.79  | 79.34  | 41.65  |
| Min                     | 86.78  | 78.27  | 58.03  | 28.45  | 18.81  | 59.67  | 15.18  |
| FUS 80+GEN 0.04+AMP 1.2 |        |        |        |        |        |        |        |
| Median (n=4)            | 90.215 | 81.415 | 70.81  | 50.175 | 36.495 | 23.62  | 1.48   |
| Max                     | 94.66  | 83.67  | 82.54  | 67.35  | 48.04  | 74.75  | 4.4    |
| Min                     | 86.78  | 80.57  | 52.42  | 28.45  | 30.13  | 7.27   | 0.07   |
| FUS 80+CHL 40+ERY 30    |        |        |        |        |        |        |        |
| Median (n=4)            | 90.215 | 84.265 | 80.21  | 38.555 | 62.03  | 53.5   | 34.305 |
| Max                     | 94.66  | 92.12  | 89.67  | 53.31  | 67.29  | 59.55  | 53.72  |
| Min                     | 86.78  | 75.65  | 58.03  | 18.81  | 54.69  | 49.09  | 27.28  |
| FUS 80+CHL 40+AMP 1.2   |        |        |        |        |        |        |        |
| Median (n=4)            | 90.215 | 81.595 | 70.81  | 62.03  | 36.495 | 41.2   | 6.39   |
| Max                     | 94.66  | 85.91  | 82.54  | 67.29  | 48.04  | 43.48  | 13.85  |
| Min                     | 86.78  | 75.65  | 52.42  | 54.69  | 30.13  | 33.99  | 4.1    |
| FUS 80+ERY 30+AMP 1.2   |        |        |        |        |        |        |        |

|                         |        |        |       |        |        |       |       |
|-------------------------|--------|--------|-------|--------|--------|-------|-------|
| Median (n=4)            | 90.215 | 87.935 | 70.81 | 38.555 | 36.495 | 27.58 | 2.845 |
| Max                     | 94.66  | 92.12  | 82.54 | 53.31  | 48.04  | 36.36 | 9.75  |
| Min                     | 86.78  | 58.03  | 52.42 | 18.81  | 30.13  | 23.36 | -0.01 |
| FUS 80+ERY 30+TOB 0.5   |        |        |       |        |        |       |       |
| Median (n=5)            | 67.39  | 80.23  | 67.59 | 19.4   | 38.72  | 75.22 | 11.06 |
| Max                     | 71.17  | 90.04  | 77.97 | 31.75  | 57.88  | 78.84 | 48.39 |
| Min                     | 55.47  | 68.44  | 61.02 | 8.63   | 36.47  | 65.94 | 4.57  |
| FUS 80+GEN 0.4+CPR 0.01 |        |        |       |        |        |       |       |
| Median (n=9)            | 78.98  | 77.99  | 83.1  | 49.71  | 60.3   | 55.98 | 1.13  |
| Max                     | 89.87  | 88.74  | 96.25 | 66.93  | 74.73  | 72.47 | 9.08  |
| Min                     | 63.45  | 63.84  | 76.9  | 0.8    | 19     | 40.68 | 0.5   |
| FUS 80+CPR 0.01+STR 1   |        |        |       |        |        |       |       |
| Median (n=5)            | 76.38  | 85.22  | 68.1  | 62.68  | 49.4   | 52.11 | 6.5   |
| Max                     | 85.51  | 90.6   | 74.61 | 66.73  | 53.16  | 56.26 | 20.45 |
| Min                     | 69.56  | 79.61  | 62.59 | 52.2   | 44.16  | 18.94 | 1.12  |
| GEN 0.4+ERY 20+STR 2    |        |        |       |        |        |       |       |
| Median (n=3)            | 78.87  | 81.38  | 75.33 | 78.1   | 2.19   | 56.77 | 2.97  |
| Max                     | 83.78  | 82.2   | 81.02 | 80.6   | 47.31  | 67.06 | 6.87  |
| Min                     | 71.73  | 68.43  | 66.62 | 77.64  | 0.51   | 49.36 | 1.61  |



|                                |       |        |       |       |        |       |        |
|--------------------------------|-------|--------|-------|-------|--------|-------|--------|
| <b>GEN 0.4+ERY 20+CHL 40</b>   |       |        |       |       |        |       |        |
| Median (n=3)                   | 77.16 | 79.46  | 84.55 | 81.61 | 78.22  | 73.42 | 73.03  |
| Max                            | 83.04 | 92.75  | 87.57 | 85.66 | 84.58  | 85.41 | 75.22  |
| Min                            | 70.13 | 75.11  | 77.84 | 72.48 | 69.49  | 60.98 | 67.14  |
| <b>GEN 0.4+STR 2+FOX 1.2</b>   |       |        |       |       |        |       |        |
| Median (n=4)                   | 83.21 | 72.82  | 82.58 | 76.57 | 57.805 | 60.46 | 42.675 |
| Max                            | 87.47 | 76.33  | 92.5  | 81.17 | 71.75  | 62.32 | 50.44  |
| Min                            | 77.16 | 68.35  | 72.78 | 61.24 | 40.88  | 43.13 | 24.96  |
| <b>GEN 0.4+NTR 1.2+TOB 0.5</b> |       |        |       |       |        |       |        |
| Median (n=2)                   | 73.2  | 90.455 | 72.55 | 47.36 | 65.47  | 32.8  | 0.96   |
| Max                            | 77.52 | 90.92  | 75.36 | 63.5  | 79.37  | 56.38 | 1.05   |
| Min                            | 68.88 | 89.99  | 69.74 | 31.22 | 51.57  | 9.22  | 0.87   |
| <b>GEN 0.4+STR 2+CHL 40</b>    |       |        |       |       |        |       |        |
| Median (n=3)                   | 77.16 | 71.26  | 84.55 | 74.21 | 78.22  | 81.89 | 74.34  |
| Max                            | 83.04 | 82.06  | 87.57 | 75.02 | 84.58  | 88.46 | 80.64  |
| Min                            | 70.13 | 68.35  | 77.84 | 61.24 | 69.49  | 72.27 | 62.5   |
| <b>GEN 0.4+CHL 40+TOB 0.5</b>  |       |        |       |       |        |       |        |
| Median (n=3)                   | 77.52 | 69.19  | 70.99 | 75.99 | 67.02  | 66.91 | 61.72  |
| Max                            | 77.54 | 82.84  | 75.36 | 78.95 | 79.37  | 76.2  | 62.41  |

|                           |       |       |       |       |       |       |       |
|---------------------------|-------|-------|-------|-------|-------|-------|-------|
| Min                       | 68.88 | 68.78 | 69.74 | 57.45 | 51.57 | 59.72 | 46.4  |
| GEN 0.4+STR 1.8+TOB 0.5   |       |       |       |       |       |       |       |
| Median (n=5)              | 77.87 | 68.49 | 80.1  | 27.32 | 63.02 | 45.74 | 5.58  |
| Max                       | 82.5  | 74.48 | 85.31 | 42.03 | 70.82 | 54.2  | 12.53 |
| Min                       | 71.74 | 60.23 | 72.21 | 16.56 | 51.1  | 34.64 | 0.81  |
| GEN 0.4+CPR 0.012+STR 1.8 |       |       |       |       |       |       |       |
| Median (n=3)              | 82.5  | 80.97 | 70.78 | 1.14  | 16.56 | 0.82  | 1.75  |
| Max                       | 82.5  | 80.97 | 70.78 | 1.14  | 16.56 | 0.82  | 1.75  |
| Min                       | 82.5  | 80.97 | 70.78 | 1.14  | 16.56 | 0.49  | 0.47  |
| GEN 0.4+TMP 0.075+STR 1.8 |       |       |       |       |       |       |       |
| Median (n=3)              | 82.5  | 83.13 | 70.78 | 6.61  | 16.56 | 9.57  | 1.26  |
| Max                       | 82.5  | 83.13 | 70.78 | 6.61  | 16.56 | 9.57  | 1.26  |
| Min                       | 82.5  | 83.13 | 70.78 | 2.89  | 16.56 | 2.82  | 0.56  |
| GEN 0.4+TMP 0.075+ERY 50  |       |       |       |       |       |       |       |
| Median (n=3)              | 82.5  | 83.13 | 59.58 | 6.61  | 42.18 | 2.57  | 0.71  |
| Max                       | 82.5  | 83.13 | 62.36 | 6.61  | 44.96 | 8.1   | 0.72  |
| Min                       | 82.5  | 83.13 | 59.58 | 2.89  | 42.18 | 2.57  | 0.71  |
| GEN 0.4+TMP 0.075+TOB 0.4 |       |       |       |       |       |       |       |
| Median (n=3)              | 82.5  | 83.13 | 85.31 | 6.61  | 70.82 | 3.09  | 0.94  |

|                          |        |       |        |       |       |       |       |
|--------------------------|--------|-------|--------|-------|-------|-------|-------|
| Max                      | 82.5   | 83.13 | 85.31  | 6.61  | 70.82 | 20.69 | 0.94  |
| Min                      | 82.5   | 83.13 | 85.31  | 2.89  | 70.82 | 3.09  | 0.5   |
| FUS 80+NTR 1.5+CPR 0.01  |        |       |        |       |       |       |       |
| Median (n=3)             | 78.98  | 77.3  | 86.71  | 77.68 | 62.97 | 64.71 | 59.02 |
| Max                      | 89.87  | 90.8  | 88.74  | 87.34 | 66.93 | 70.22 | 62.54 |
| Min                      | 63.45  | 75.38 | 63.84  | 75.68 | 55.87 | 56.66 | 48.3  |
| FUS 80+NTR 1.5+STR 2     |        |       |        |       |       |       |       |
| Median (n=2)             | 84.425 | 84.05 | 62.075 | 82.51 | 44.89 | 5.675 | 7.095 |
| Max                      | 89.87  | 90.8  | 64.99  | 87.34 | 46.87 | 9.21  | 11.67 |
| Min                      | 78.98  | 77.3  | 59.16  | 77.68 | 42.91 | 2.14  | 2.52  |
| FUS 80+NTR 1.5+GEN 0.4   |        |       |        |       |       |       |       |
| Median (n=3)             | 78.98  | 77.3  | 77.33  | 77.68 | 34.63 | 25.27 | 1.14  |
| Max                      | 89.87  | 90.8  | 83.12  | 87.34 | 40.68 | 33.5  | 1.82  |
| Min                      | 63.45  | 75.38 | 76.95  | 75.68 | 19    | 24.03 | 0.88  |
| FUS 80+STR 2+GEN 0.4     |        |       |        |       |       |       |       |
| Median (n=3)             | 78.98  | 61.06 | 77.3   | 46    | 34.63 | 43.87 | 0.93  |
| Max                      | 89.87  | 64.99 | 83.1   | 46.87 | 40.68 | 49.97 | 2.13  |
| Min                      | 63.45  | 59.16 | 76.9   | 42.91 | 19    | 37.62 | 0.89  |
| GEN 0.4+CHL 70+CPR 0.012 |        |       |        |       |       |       |       |

|                               |        |        |        |       |        |        |        |
|-------------------------------|--------|--------|--------|-------|--------|--------|--------|
| Median (n=3)                  | 79.9   | 88.8   | 86.5   | 71.1  | 36.9   | 68.7   | 55.2   |
| Max                           | 91.9   | 90.1   | 87.5   | 74.7  | 43.6   | 72.1   | 56.8   |
| Min                           | 78.9   | 86.5   | 83.5   | 69.7  | 33.4   | 64     | 48.5   |
| DOX 0.65+GEN 0.4+FOX 1        |        |        |        |       |        |        |        |
| Median (n=4)                  | 80.785 | 82.855 | 67.635 | 58.47 | 54.8   | 21.825 | 31.575 |
| Max                           | 92.57  | 89.19  | 76.96  | 70.28 | 62.97  | 30.73  | 44.68  |
| Min                           | 72.48  | 81.26  | 64.39  | 47.46 | 53.5   | 14.75  | 15.38  |
| DOX 0.65+GEN 0.4+TOB 0.5      |        |        |        |       |        |        |        |
| Median (n=4)                  | 85.235 | 81.84  | 89.095 | 66.92 | 71.36  | 70.5   | 52.8   |
| Max                           | 92.57  | 83.29  | 94     | 70.28 | 87.79  | 77.3   | 59.18  |
| Min                           | 72.48  | 78.56  | 85.9   | 47.46 | 62.57  | 62.42  | 2.43   |
| DOX 0.65+GEN 0.4+STR 2        |        |        |        |       |        |        |        |
| Median (n=4)                  | 79.81  | 81.84  | 79.815 | 56.54 | 65.435 | 56.46  | 43.115 |
| Max                           | 92.57  | 89.19  | 89.31  | 70.28 | 78.97  | 57.35  | 54.32  |
| Min                           | 72.48  | 78.56  | 71.59  | 47.46 | 54.91  | 48.87  | 10.94  |
| DOX 0.65+GEN 0.4+CPR<br>0.012 |        |        |        |       |        |        |        |
| Median (n=4)                  | 85.235 | 81.84  | 85.11  | 66.92 | 82.555 | 73.58  | 58.525 |
| Max                           | 92.57  | 83.29  | 89     | 70.28 | 91.36  | 76.54  | 67.54  |

|                          |       |        |        |        |       |        |       |
|--------------------------|-------|--------|--------|--------|-------|--------|-------|
| Min                      | 72.48 | 78.56  | 76.86  | 47.46  | 48.99 | 62.31  | 5.65  |
| DOX 0.65+GEN 0.4+NTR 2   |       |        |        |        |       |        |       |
| Median (n=5)             | 87.4  | 83.27  | 86.4   | 59.46  | 83.78 | 49.78  | 38.46 |
| Max                      | 92.83 | 90.86  | 90.2   | 75.12  | 92.37 | 64.69  | 56.53 |
| Min                      | 82.31 | 73.28  | 81.43  | 58.4   | 76.44 | 40.54  | 26.81 |
| DOX 0.65+FOX 1+TOB 0.5   |       |        |        |        |       |        |       |
| Median (n=3)             | 86.21 | 64.39  | 88.68  | 55.29  | 72.07 | 52.09  | 54.83 |
| Max                      | 92.57 | 65.1   | 89.51  | 62.97  | 87.79 | 54.09  | 56.79 |
| Min                      | 84.26 | 58.15  | 85.9   | 53.95  | 70.65 | 51.67  | 48.29 |
| DOX 0.65+FOX 1+STR 2     |       |        |        |        |       |        |       |
| Median (n=4)             | 83.25 | 60.285 | 85.845 | 41.625 | 69.59 | 30.665 | 30.84 |
| Max                      | 92.78 | 63.7   | 86.69  | 52.45  | 74.35 | 38.39  | 34.21 |
| Min                      | 77.76 | 51.19  | 71.37  | 35.4   | 60.56 | 11.83  | 22.65 |
| DOX 0.65+FOX 1+CPR 0.012 |       |        |        |        |       |        |       |
| Median (n=3)             | 82.31 | 59.29  | 90.78  | 44.66  | 44.55 | 19.26  | 28.93 |
| Max                      | 85.64 | 63.7   | 93.99  | 47.48  | 65.9  | 20.08  | 30.29 |
| Min                      | 77.76 | 57.48  | 79.82  | 35.4   | 32.75 | 12.02  | 24.13 |
| DOX 0.65+STR 2+CPR 0.012 |       |        |        |        |       |        |       |
| Median (n=3)             | 87.4  | 85.58  | 91.92  | 60.56  | 68.14 | 68.81  | 51.18 |

|                            |        |        |        |         |        |        |        |
|----------------------------|--------|--------|--------|---------|--------|--------|--------|
| Max                        | 92.78  | 86.11  | 93.99  | 73.77   | 75.77  | 74.58  | 69.01  |
| Min                        | 82.31  | 71.21  | 89.53  | 50.01   | 65.9   | 27.56  | 30.12  |
| DOX 0.65+TOB 0.5+CPR 0.012 |        |        |        |         |        |        |        |
| Median (n=4)               | 86.585 | 93.155 | 92.955 | 83.87   | 70.835 | 84.51  | 75.54  |
| Max                        | 92.78  | 94.12  | 95.28  | 87.22   | 76.81  | 87.75  | 82.47  |
| Min                        | 82.31  | 88.39  | 91.02  | 67.62   | 39.61  | 81.43  | 18.55  |
| DOX 0.65+FOX 1+NTR 2       |        |        |        |         |        |        |        |
| Median (n=2)               | 90.94  | 94.015 | 93.57  | 111.795 | 99.59  | 95.245 | 67.745 |
| Max                        | 92.9   | 94.24  | 95.19  | 114.64  | 104.97 | 96.98  | 69.08  |
| Min                        | 88.98  | 93.79  | 91.95  | 108.95  | 94.21  | 93.51  | 66.41  |
| DOX 0.6+NTR 2+ERY 40       |        |        |        |         |        |        |        |
| Median (n=4)               | 74.375 | 87.78  | 76.03  | 79.345  | 20.14  | 63.685 | 30.015 |
| Max                        | 81.66  | 91.1   | 85.75  | 89.9    | 43.47  | 70.07  | 49.13  |
| Min                        | 66.7   | 81.26  | 67.5   | 73.97   | 0.6    | 45.9   | 8.2    |
| DOX 0.6+NTR 2+TMP 0.08     |        |        |        |         |        |        |        |
| Median (n=4)               | 63.4   | 85.8   | 63.7   | 76.1    | 50.2   | 0.5    | 0.35   |
| Max                        | 69.3   | 91.1   | 80.6   | 89.9    | 61.6   | 1.3    | 0.8    |
| Min                        | 57.6   | 82.6   | 56.8   | 69.1    | 41.1   | 0.2    | 0.2    |
| DOX 0.65+NTR 2+CLI 20      |        |        |        |         |        |        |        |

|                           |         |         |         |         |         |         |         |
|---------------------------|---------|---------|---------|---------|---------|---------|---------|
| Median (n=2)              | 81.665  | 88.26   | 90.715  | 76.495  | 60.455  | 45.565  | 47.345  |
| Max                       | 83.88   | 95.26   | 94.36   | 79.02   | 66.51   | 48.17   | 51.68   |
| Min                       | 79.45   | 81.26   | 87.07   | 73.97   | 54.4    | 42.96   | 43.01   |
| DOX 0.65+FUS 110+AMP 1.2  |         |         |         |         |         |         |         |
| Median (n=3)              | 87.31   | 81.66   | 72.39   | 47.58   | 49.27   | 25.48   | 4.98    |
| Max                       | 92.85   | 87.36   | 76.48   | 49.89   | 51.55   | 30.84   | 8.81    |
| Min                       | 81.77   | 75.96   | 68.29   | 45.27   | 46.99   | 20.12   | 1.16    |
| DOX 0.65+TMP 0.07+ERY 60  |         |         |         |         |         |         |         |
| Median (n=2)              | 82.0279 | 52.9497 | 83.4541 | 57.9604 | 80.516  | 14.9225 | 0.91359 |
| Max                       | 96.2638 | 62.1698 | 85.487  | 61.3172 | 94.1689 | 16.9787 | 0.99962 |
| Min                       | 67.792  | 43.7296 | 81.4211 | 54.6037 | 66.8631 | 12.8663 | 0.82757 |
| DOX 0.65+AMP 1.2+ERY 60   |         |         |         |         |         |         |         |
| Median (n=3)              | 87.31   | 72.39   | 63.97   | 49.27   | 7.8     | 5.27    | 3.56    |
| Max                       | 92.85   | 76.48   | 69.89   | 51.55   | 7.9     | 5.28    | 4.2     |
| Min                       | 81.77   | 68.29   | 58.05   | 46.99   | 7.7     | 5.27    | 2.92    |
| DOX 0.65+TMP 0.07+AMP 1.2 |         |         |         |         |         |         |         |
| Median (n=2)              | 82.0279 | 66.1454 | 52.9497 | 45.8473 | 57.9604 | 1.2951  | 0.77656 |
| Max                       | 96.2638 | 71.0641 | 62.1698 | 52.5685 | 61.3172 | 1.8069  | 0.79723 |
| Min                       | 67.792  | 61.2267 | 43.7296 | 39.126  | 54.6037 | 0.78336 | 0.75589 |

|                         |      |      |      |      |      |      |      |
|-------------------------|------|------|------|------|------|------|------|
| DOX 0.5+CHL 50+CPR 0.01 |      |      |      |      |      |      |      |
| Median (n=5)            | 75.9 | 81.9 | 90.4 | 56.5 | 67.7 | 74.3 | 47.6 |
| Max                     | 83.2 | 85.6 | 94.9 | 59.3 | 69.8 | 79.6 | 50.6 |
| Min                     | 68.6 | 76   | 89.5 | 53.5 | 61.3 | 71.5 | 46.6 |
| DOX 0.5+CHL 50+NTR 1    |      |      |      |      |      |      |      |
| Median (n=5)            | 75.9 | 81.9 | 90.9 | 56.5 | 76.8 | 70.8 | 55   |
| Max                     | 83.2 | 85.6 | 95.2 | 59.3 | 82.5 | 73   | 56.5 |
| Min                     | 68.6 | 76   | 87.4 | 53.5 | 74.1 | 62.4 | 50.4 |
| DOX 0.5+CHL 50+AMP 1    |      |      |      |      |      |      |      |
| Median (n=5)            | 75.9 | 81.9 | 80.7 | 56.5 | 20.4 | 24.1 | 8.2  |
| Max                     | 83.2 | 85.6 | 85.7 | 59.3 | 26.5 | 40.9 | 12   |
| Min                     | 68.6 | 76   | 80.2 | 53.5 | 13.6 | 19.5 | 6.2  |
| DOX 0.5+CHL 50+ERY 30   |      |      |      |      |      |      |      |
| Median (n=5)            | 75.9 | 81.9 | 82.7 | 56.5 | 69.2 | 67.5 | 25.4 |
| Max                     | 83.2 | 85.6 | 86.4 | 59.3 | 71.3 | 75.6 | 27.9 |
| Min                     | 68.6 | 76   | 75.7 | 53.5 | 61.2 | 61.4 | 24.7 |
| DOX 0.5+CHL 50+CLI 20   |      |      |      |      |      |      |      |
| Median (n=5)            | 75.9 | 81.9 | 72.5 | 56.5 | 67.3 | 69.4 | 47   |
| Max                     | 83.2 | 85.6 | 78.3 | 59.3 | 73.6 | 75.9 | 52.6 |



|                         |      |      |       |      |       |      |       |
|-------------------------|------|------|-------|------|-------|------|-------|
| Min                     | 68.6 | 76   | 69.7  | 53.5 | 62.4  | 63.9 | 43.7  |
| DOX 0.5+CHL 50+TMP 0.07 |      |      |       |      |       |      |       |
| Median (n=3)            | 67.6 | 63.3 | 78.5  | 46.6 | 54    | 67   | 52.1  |
| Max                     | 70.4 | 66.1 | 90.9  | 47.8 | 57.8  | 78.4 | 52.2  |
| Min                     | 63   | 63   | 77.6  | 45.9 | 52.6  | 65.6 | 49.4  |
| DOX 0.5+CHL 50+FOX 1    |      |      |       |      |       |      |       |
| Median (n=4)            | 65.3 | 64.7 | 77.05 | 47.2 | 47.8  | 13.4 | 18.1  |
| Max                     | 70.4 | 66.9 | 79.5  | 48.2 | 52.8  | 21.7 | 21.2  |
| Min                     | 62.4 | 63   | 66.2  | 45.9 | 42.5  | 8.7  | 12.2  |
| DOX 0.5+CHL 50+TOB 0.5  |      |      |       |      |       |      |       |
| Median (n=4)            | 65.3 | 64.7 | 81.75 | 47.2 | 59.05 | 65.9 | 50.45 |
| Max                     | 70.4 | 66.9 | 87.1  | 48.2 | 64.1  | 67.4 | 50.6  |
| Min                     | 62.4 | 63   | 79.2  | 45.9 | 50.5  | 61.6 | 49.1  |
| DOX 0.5+CHL 50+STR 2    |      |      |       |      |       |      |       |
| Median (n=3)            | 63   | 63.3 | 83.6  | 47.8 | 54.5  | 65.6 | 47.5  |
| Max                     | 70.4 | 66.9 | 85.2  | 48.2 | 57    | 70.5 | 47.7  |
| Min                     | 62.4 | 63   | 78    | 46.6 | 53.7  | 63   | 47    |
| DOX 0.5+TOB 0.5+STR 2   |      |      |       |      |       |      |       |
| Median (n=3)            | 63   | 83.6 | 83.6  | 63   | 54.5  | 77.8 | 51.9  |

|                               |       |       |       |       |       |      |       |
|-------------------------------|-------|-------|-------|-------|-------|------|-------|
| Max                           | 70.4  | 87.1  | 85.2  | 64.1  | 57    | 80.4 | 56.2  |
| Min                           | 62.4  | 79.2  | 78    | 55.1  | 53.7  | 70.5 | 47.5  |
| DOX 0.5+CPR 0.01+NTR 1        |       |       |       |       |       |      |       |
| Median (n=3)                  | 78.59 | 92.16 | 62.77 | 59.28 | 84.58 | 2.76 | 6.96  |
| Max                           | 79.18 | 96.98 | 68.71 | 72.02 | 86.31 | 3.92 | 17.96 |
| Min                           | 77.42 | 89.9  | 60.59 | 46.33 | 78.64 | 0.88 | 4.62  |
| DOX 0.65+CPR 0.015+AMP<br>1.2 |       |       |       |       |       |      |       |
| Median (n=3)                  | 75.5  | 64.7  | 85    | 43.8  | 12.5  | 15.7 | 0.1   |
| Max                           | 84.2  | 79.4  | 94    | 46    | 22.4  | 18.6 | 0.1   |
| Min                           | 74    | 60.4  | 67.6  | 38    | 0     | 15.4 | 0     |
| DOX 0.5+CPR 0.01+ERY 30       |       |       |       |       |       |      |       |
| Median (n=3)                  | 71.7  | 93.3  | 74.6  | 64.5  | 49    | 76.5 | 50.2  |
| Max                           | 73.8  | 93.6  | 80.9  | 65.6  | 49.3  | 84.9 | 50.8  |
| Min                           | 71.6  | 86.2  | 65.8  | 62.7  | 46.4  | 71.1 | 46.5  |
| DOX 0.5+CPR 0.01+CLI 20       |       |       |       |       |       |      |       |
| Median (n=3)                  | 71.7  | 93.3  | 77.3  | 64.5  | 58.9  | 51.7 | 44.9  |
| Max                           | 73.8  | 93.6  | 79.4  | 65.6  | 60.9  | 54.4 | 46.4  |
| Min                           | 71.6  | 86.2  | 71.6  | 62.7  | 56.3  | 51.5 | 42.6  |

|                                 |      |      |       |      |       |       |      |
|---------------------------------|------|------|-------|------|-------|-------|------|
| <b>DOX 0.6+NTR 2+AMP 1.2</b>    |      |      |       |      |       |       |      |
| Median (n=5)                    | 79   | 62.8 | 73.4  | 86.3 | 9.9   | 16.4  | 17.2 |
| Max                             | 90.3 | 82.2 | 92.7  | 89.7 | 17.3  | 24.4  | 20.3 |
| Min                             | 77.4 | 60.6 | 66.2  | 78.6 | 9.6   | 13.1  | 13.9 |
| <b>DOX 0.5+GEN 0.4+TMP 0.07</b> |      |      |       |      |       |       |      |
| Median (n=4)                    | 62.8 | 76.5 | 66.4  | 42.9 | 40.65 | 36.5  | 3.45 |
| Max                             | 64   | 81.3 | 70    | 51.2 | 47    | 49    | 7.1  |
| Min                             | 58.6 | 73.5 | 58.7  | 34.3 | 39.1  | 12.7  | 0.9  |
| <b>DOX 0.5+GEN 0.4+CHL 50</b>   |      |      |       |      |       |       |      |
| Median (n=4)                    | 62.8 | 76.5 | 65.55 | 42.9 | 41.1  | 66.9  | 37.7 |
| Max                             | 64   | 81.3 | 70.2  | 51.2 | 42.9  | 68.4  | 42.6 |
| Min                             | 58.6 | 73.5 | 61.7  | 34.3 | 33.4  | 65    | 30   |
| <b>DOX 0.5+GEN 0.4+AMP 1.2</b>  |      |      |       |      |       |       |      |
| Median (n=3)                    | 62   | 79.4 | 82.3  | 38   | 14.3  | 23.9  | 1.2  |
| Max                             | 64   | 81.3 | 82.4  | 51.2 | 28.3  | 24.2  | 1.6  |
| Min                             | 58.6 | 73.5 | 76.7  | 34.3 | 12.8  | 21.6  | 0.7  |
| <b>DOX 0.5+GEN 0.4+ERY 30</b>   |      |      |       |      |       |       |      |
| Median (n=4)                    | 62.8 | 76.5 | 54.75 | 42.9 | 35.35 | 57.65 | 18   |
| Max                             | 64   | 81.3 | 59.4  | 51.2 | 41.5  | 61.6  | 32.4 |

|                               |      |      |       |      |      |       |       |
|-------------------------------|------|------|-------|------|------|-------|-------|
| Min                           | 58.6 | 73.5 | 51.7  | 34.3 | 17.9 | 55.7  | 4.3   |
| <b>DOX 0.5+GEN 0.4+CLI 20</b> |      |      |       |      |      |       |       |
| Median (n=4)                  | 62.8 | 76.5 | 67.65 | 42.9 | 55   | 65.85 | 49.65 |
| Max                           | 64   | 81.3 | 70.9  | 51.2 | 56.9 | 67.8  | 51.9  |
| Min                           | 58.6 | 73.5 | 63.1  | 34.3 | 52.8 | 62.9  | 45.5  |
| <b>DOX 0.4+STR 2+NTR 1.5</b>  |      |      |       |      |      |       |       |
| Median (n=5)                  | 83.7 | 72.6 | 79.3  | 66.1 | 74.6 | 37.9  | 44.1  |
| Max                           | 85.2 | 73.9 | 82.4  | 67.6 | 78.5 | 42.4  | 50    |
| Min                           | 76.7 | 68.4 | 77.1  | 61.2 | 72.6 | 4     | 40.9  |
| <b>DOX 0.4+STR 2+AMP 1.2</b>  |      |      |       |      |      |       |       |
| Median (n=5)                  | 83.7 | 72.6 | 67    | 66.1 | 21.4 | 26.5  | 1.9   |
| Max                           | 85.2 | 73.9 | 68.3  | 67.6 | 30   | 28.9  | 10.1  |
| Min                           | 76.7 | 68.4 | 59.6  | 61.2 | 12.8 | 16.1  | 1     |
| <b>DOX 0.4+STR 2+ERY 30</b>   |      |      |       |      |      |       |       |
| Median (n=5)                  | 83.7 | 72.6 | 89.1  | 66.1 | 75.4 | 82    | 67.8  |
| Max                           | 85.2 | 73.9 | 91.9  | 67.6 | 86.3 | 85.3  | 78.2  |
| Min                           | 76.7 | 68.4 | 86.4  | 61.2 | 68.5 | 79.2  | 63.6  |
| <b>DOX 0.4+STR 2+CLI 20</b>   |      |      |       |      |      |       |       |
| Median (n=5)                  | 83.7 | 72.6 | 70.9  | 66.1 | 72.9 | 68.4  | 64.8  |

|                         |       |      |       |       |       |       |       |
|-------------------------|-------|------|-------|-------|-------|-------|-------|
| Max                     | 85.2  | 73.9 | 72.1  | 67.6  | 81.4  | 71.4  | 71.8  |
| Min                     | 76.7  | 68.4 | 68.1  | 61.2  | 65.6  | 66.8  | 63    |
| DOX 0.4+ERY 30+CLI 20   |       |      |       |       |       |       |       |
| Median (n=5)            | 83.7  | 89.1 | 70.9  | 75.4  | 72.9  | 67    | 61.5  |
| Max                     | 85.2  | 91.9 | 72.1  | 86.3  | 81.4  | 67.5  | 69.8  |
| Min                     | 76.7  | 86.4 | 68.1  | 68.5  | 65.6  | 66.2  | 55.2  |
| DOX 0.4+FOX 1+AMP 1.2   |       |      |       |       |       |       |       |
| Median (n=4)            | 84.25 | 79.9 | 77.25 | 74.95 | 54.95 | 23.65 | 1     |
| Max                     | 91.4  | 88.3 | 86.8  | 89.3  | 57    | 31.8  | 4.6   |
| Min                     | 75.3  | 70.7 | 74.9  | 64.8  | 44.4  | 15.8  | 0.8   |
| DOX 0.4+FOX 1+ERY 30    |       |      |       |       |       |       |       |
| Median (n=3)            | 87.3  | 83.7 | 65.5  | 82.3  | 53.3  | 17    | 17.8  |
| Max                     | 91.4  | 88.3 | 73.9  | 89.3  | 56.2  | 23.7  | 20.5  |
| Min                     | 81.2  | 76.1 | 62.4  | 64.8  | 47.8  | 17    | 12.6  |
| DOX 0.4+FOX 1+CLI 20    |       |      |       |       |       |       |       |
| Median (n=4)            | 84.25 | 79.9 | 75.05 | 74.95 | 68.95 | 19    | 14.85 |
| Max                     | 91.4  | 88.3 | 77.5  | 89.3  | 75.5  | 25.1  | 27.6  |
| Min                     | 75.3  | 70.7 | 73.4  | 64.8  | 65.4  | 10.3  | 10.2  |
| DOX 0.65+TMP 0.08+FOX 1 |       |      |       |       |       |       |       |

|                          |      |       |       |       |       |      |       |
|--------------------------|------|-------|-------|-------|-------|------|-------|
| Median (n=3)             | 64.4 | 78.9  | 66.7  | 41.8  | 28.4  | 21.8 | 26.4  |
| Max                      | 68   | 79.3  | 67.2  | 53.9  | 40.6  | 23.9 | 30.5  |
| Min                      | 60.9 | 69    | 62.2  | 25.5  | 21.8  | 18.6 | 11.8  |
| DOX 0.65+TMP 0.08+CLI 20 |      |       |       |       |       |      |       |
| Median (n=3)             | 64.4 | 78.9  | 74.4  | 41.8  | 58.7  | 4.3  | 0.2   |
| Max                      | 68   | 79.3  | 81.7  | 53.9  | 61    | 22.8 | 2.7   |
| Min                      | 60.9 | 69    | 74.2  | 25.5  | 38.1  | 0.1  | 0.1   |
| DOX 0.4+FUS 80+CHL 50    |      |       |       |       |       |      |       |
| Median (n=3)             | 88.4 | 91.1  | 89.2  | 56.3  | 71.6  | 58.1 | 32.5  |
| Max                      | 89.4 | 94.4  | 92.5  | 65.5  | 77.5  | 69.6 | 35.6  |
| Min                      | 82.6 | 89.6  | 84.1  | 53.5  | 62.7  | 52.3 | 21.6  |
| DOX 0.4+FUS 80+FOX 1     |      |       |       |       |       |      |       |
| Median (n=4)             | 88.9 | 92.65 | 63.4  | 60.25 | 45.95 | 45.2 | 16.5  |
| Max                      | 93.8 | 94.4  | 64.9  | 65.5  | 49.6  | 47.9 | 23.5  |
| Min                      | 81.2 | 91.1  | 61.7  | 56.3  | 39.6  | 38   | 9.8   |
| DOX 0.4+FUS 80+TMP 0.07  |      |       |       |       |       |      |       |
| Median (n=6)             | 87.3 | 90.85 | 62.25 | 57.25 | 62.9  | 63.4 | 34.45 |
| Max                      | 93.8 | 94.4  | 86.8  | 65.5  | 72.6  | 81.4 | 51.3  |
| Min                      | 81.2 | 86.8  | 56.5  | 52.2  | 29.5  | 49.7 | 13.8  |

|                           |       |       |      |      |      |       |       |
|---------------------------|-------|-------|------|------|------|-------|-------|
| DOX 0.4+FUS 80+TOB 0.5    |       |       |      |      |      |       |       |
| Median (n=2)              | 86    | 90.35 | 88   | 54.9 | 69.8 | 67.45 | 30.75 |
| Max                       | 89.4  | 91.1  | 88.3 | 56.3 | 74.2 | 68.6  | 34.9  |
| Min                       | 82.6  | 89.6  | 87.7 | 53.5 | 65.4 | 66.3  | 26.6  |
| DOX 0.65+TMP 0.08+TOB 0.5 |       |       |      |      |      |       |       |
| Median (n=5)              | 68    | 78.9  | 81   | 41.8 | 43.4 | 30    | 7.4   |
| Max                       | 93.8  | 80.6  | 87.4 | 78.4 | 66.6 | 42.1  | 16.2  |
| Min                       | 60.9  | 56.5  | 79.6 | 25.5 | 37.2 | 17.3  | 0.4   |
| DOX 0.65+VAN 35+FUS 110   |       |       |      |      |      |       |       |
| Median (n=4)              | 65    | 96.15 | 83.4 | 9.95 | 11.3 | 52.9  | 0.75  |
| Max                       | 75.7  | 116.1 | 94.1 | 12.5 | 13.4 | 65.2  | 0.8   |
| Min                       | 55.9  | 91.7  | 79   | 0.9  | 9.5  | 39.5  | 0.6   |
| DOX 0.5+VAN 35+GEN 0.4    |       |       |      |      |      |       |       |
| Median (n=5)              | 87.7  | 111   | 88.4 | 49.8 | 34.9 | 62.5  | 1.3   |
| Max                       | 96    | 115.7 | 92.6 | 59.6 | 40.5 | 80.9  | 9.1   |
| Min                       | 83.8  | 106.6 | 81   | 30.9 | 24.3 | 55.3  | 0.7   |
| DOX 0.65+VAN 35+CHL 70    |       |       |      |      |      |       |       |
| Median (n=4)              | 69.35 | 108.3 | 89.9 | 11.2 | 31.8 | 46.3  | 9.6   |
| Max                       | 75.7  | 120.5 | 96.9 | 14   | 40.2 | 91.1  | 11.6  |

|                                 |      |       |       |      |      |       |      |
|---------------------------------|------|-------|-------|------|------|-------|------|
| Min                             | 62.1 | 91.8  | 82    | 0.9  | 22.5 | 38    | 0.7  |
| <b>DOX 0.5+VAN 35+FOX</b>       |      |       |       |      |      |       |      |
| Median (n=5)                    | 87.7 | 111   | 67.2  | 49.8 | 44.2 | 74.5  | 30.7 |
| Max                             | 96   | 115.7 | 71.5  | 59.6 | 50   | 80.3  | 46.7 |
| Min                             | 83.8 | 106.6 | 60.4  | 30.9 | 37.2 | 70.3  | 7.5  |
| <b>DOX 0.65+FUS 110+GEN 0.4</b> |      |       |       |      |      |       |      |
| Median (n=4)                    | 65   | 83.4  | 81.95 | 11.3 | 14.7 | 12.85 | 1    |
| Max                             | 75.7 | 94.1  | 84.7  | 13.4 | 37.8 | 31.9  | 1.2  |
| Min                             | 55.9 | 79    | 78.8  | 9.5  | 11.3 | 2.9   | 0.8  |
| <b>DOX 0.7+TOB 0.5+NTR 3</b>    |      |       |       |      |      |       |      |
| Median (n=5)                    | 67.7 | 84.1  | 67    | 62.2 | 67.7 | 34    | 42.6 |
| Max                             | 72.6 | 87.3  | 82.1  | 64.8 | 68.7 | 39.3  | 44.5 |
| Min                             | 64.8 | 76.2  | 62    | 59.8 | 61.7 | 30    | 39.6 |
| <b>DOX 0.7+TOB 0.5+AMP 1.2</b>  |      |       |       |      |      |       |      |
| Median (n=5)                    | 67.7 | 84.1  | 68.9  | 62.2 | 28.8 | 16.7  | 15.9 |
| Max                             | 72.6 | 87.3  | 73.3  | 64.8 | 31.6 | 19.5  | 23.8 |
| Min                             | 64.8 | 76.2  | 67.4  | 59.8 | 23.4 | 13.1  | 6.7  |
| <b>DOX 0.7+TOB 0.5+ERY 60</b>   |      |       |       |      |      |       |      |
| Median (n=5)                    | 67.7 | 84.1  | 86.4  | 62.2 | 8.9  | 78.9  | 7.7  |



|                        |      |       |      |      |      |      |      |
|------------------------|------|-------|------|------|------|------|------|
| Max                    | 72.6 | 87.3  | 89.5 | 64.8 | 16   | 81.5 | 12.2 |
| Min                    | 64.8 | 76.2  | 73.8 | 59.8 | 5.7  | 66.5 | 6.8  |
| DOX 0.7+TOB 0.5+CLI 20 |      |       |      |      |      |      |      |
| Median (n=5)           | 67.7 | 84.1  | 72.1 | 62.2 | 59.1 | 75.5 | 65.3 |
| Max                    | 72.6 | 87.3  | 75.1 | 64.8 | 62.4 | 78.4 | 66.3 |
| Min                    | 64.8 | 76.2  | 67.6 | 59.8 | 55.2 | 70.9 | 60.9 |
| DOX 0.7+AMP 1.2+CLI 20 |      |       |      |      |      |      |      |
| Median (n=5)           | 67.7 | 68.9  | 72.1 | 28.8 | 59.1 | 18.3 | 5.6  |
| Max                    | 72.6 | 73.3  | 75.1 | 31.6 | 62.4 | 23.9 | 13.6 |
| Min                    | 64.8 | 67.4  | 67.6 | 23.4 | 55.2 | 13.6 | 4.4  |
| DOX 0.6+VAN 35+NTR 2   |      |       |      |      |      |      |      |
| Median (n=5)           | 79   | 109.2 | 62.8 | 12.6 | 86.3 | 3.4  | 7.6  |
| Max                    | 90.3 | 119.1 | 82.2 | 41.6 | 89.7 | 7.6  | 14.2 |
| Min                    | 77.4 | 103.3 | 60.6 | 0.6  | 78.6 | 1.2  | 1.4  |
| DOX 0.6+VAN 35+AMP 1.2 |      |       |      |      |      |      |      |
| Median (n=3)           | 90.6 | 110.2 | 93.6 | 30.1 | 38   | 94.6 | 13   |
| Max                    | 94.5 | 112   | 95   | 37.5 | 39.5 | 98.8 | 17.3 |
| Min                    | 85.5 | 109.1 | 90.2 | 29.1 | 18.5 | 87   | 8.8  |
| DOX 0.6+VAN 35+CLI 20  |      |       |      |      |      |      |      |

|                               |       |       |       |      |       |      |       |
|-------------------------------|-------|-------|-------|------|-------|------|-------|
| Median (n=3)                  | 90.6  | 109.1 | 90.5  | 30.1 | 72.6  | 76.6 | 52.9  |
| Max                           | 91    | 110.2 | 93.8  | 33.5 | 79.4  | 86.4 | 55.7  |
| Min                           | 85.5  | 107.9 | 86.7  | 29.1 | 67.7  | 75.7 | 52.4  |
| DOX 0.65+TMP 0.1+CPR<br>0.015 |       |       |       |      |       |      |       |
| Median (n=2)                  | 79.85 | 70.35 | 72.05 | 40.9 | 40.45 | 0.05 | 3.5   |
| Max                           | 84.2  | 76.7  | 79.4  | 43.8 | 61.9  | 0.1  | 5.8   |
| Min                           | 75.5  | 64    | 64.7  | 38   | 19    | 0    | 1.2   |
| DOX 0.65+TMP 0.1+STR 1.5      |       |       |       |      |       |      |       |
| Median (n=4)                  | 78.95 | 70.35 | 75.95 | 56.6 | 52.45 | 2.55 | 41.85 |
| Max                           | 84.2  | 93.8  | 83.4  | 74.5 | 54    | 13.4 | 48.9  |
| Min                           | 75.5  | 61.6  | 74.2  | 19   | 49.3  | 0.3  | 27.6  |
| DOX 0.65+FUS 110+NTR 2.8      |       |       |       |      |       |      |       |
| Median (n=5)                  | 79    | 68.4  | 62.8  | 5.1  | 86.3  | 33.5 | 29.8  |
| Max                           | 90.3  | 82.9  | 82.2  | 13.1 | 89.7  | 40.5 | 35.1  |
| Min                           | 77.4  | 63.6  | 60.6  | 3.4  | 78.6  | 20.1 | 17.2  |
| DOX 0.65+VAN 35+ERY 30        |       |       |       |      |       |      |       |
| Median (n=5)                  | 70.2  | 102.2 | 112.7 | 7.5  | 5.3   | 59.4 | 16.1  |
| Max                           | 74.2  | 107.4 | 121   | 34.6 | 21.9  | 62.3 | 19.1  |

|                               |      |        |       |       |       |      |      |
|-------------------------------|------|--------|-------|-------|-------|------|------|
| Min                           | 65   | 93.7   | 111   | 3.2   | 3.4   | 32.3 | 7.5  |
| DOX 0.65+VAN 35+TMP 0.08      |      |        |       |       |       |      |      |
| Median (n=4)                  | 69.6 | 102.15 | 64.15 | 20.75 | 23.55 | 0.15 | 0.2  |
| Max                           | 74.2 | 107.4  | 68.5  | 34.6  | 33.7  | 0.4  | 0.4  |
| Min                           | 65   | 93.7   | 62    | 3.2   | 13.1  | 0.1  | 0    |
| DOX 0.65+VAN 35+CPR 0.012     |      |        |       |       |       |      |      |
| Median (n=3)                  | 71.2 | 100.3  | 85.9  | 34    | 49.7  | 32.9 | 0.2  |
| Max                           | 74.2 | 107.4  | 94.3  | 34.6  | 59.9  | 34.1 | 0.2  |
| Min                           | 65   | 93.7   | 84.1  | 7.5   | 44.4  | 14   | 0    |
| DOX 0.65+FUS 110+CPR<br>0.012 |      |        |       |       |       |      |      |
| Median (n=3)                  | 71.2 | 90.2   | 85.9  | 11.9  | 49.7  | 18.7 | 0    |
| Max                           | 74.2 | 90.7   | 94.3  | 14.6  | 59.9  | 41.2 | 0.1  |
| Min                           | 65   | 78.4   | 84.1  | 5.3   | 44.4  | 7.9  | 0    |
| DOX 0.6+FUS 110+CLI 20        |      |        |       |       |       |      |      |
| Median (n=5)                  | 81   | 72.9   | 91    | 10    | 66.7  | 46.3 | 11.4 |
| Max                           | 99.6 | 77.6   | 96.9  | 11.2  | 74.6  | 65.3 | 13.2 |
| Min                           | 78.2 | 59.1   | 79.2  | 7.2   | 63.8  | 44.4 | 7.8  |
| DOX 0.65+FUS 110+ERY 60       |      |        |       |       |       |      |      |

|                         |       |        |        |        |        |        |        |
|-------------------------|-------|--------|--------|--------|--------|--------|--------|
| Median (n=3)            | 87.3  | 81.7   | 64     | 47.6   | 7.8    | 5.3    | 3.6    |
| Max                     | 92.9  | 87.4   | 69.9   | 49.9   | 7.9    | 5.3    | 4.2    |
| Min                     | 81.8  | 76     | 58     | 45.3   | 7.7    | 5.3    | 2.9    |
| DOX 0.4+VAN 35+TOB 0.5  |       |        |        |        |        |        |        |
| Median (n=4)            | 83.81 | 101.58 | 76.935 | 36.725 | 56.145 | 81.285 | 26.38  |
| Max                     | 93.56 | 106.55 | 83.55  | 79.8   | 63.66  | 89.46  | 49.3   |
| Min                     | 83.25 | 96.3   | 71.22  | 22.45  | 49.42  | 68.15  | 20.76  |
| DOX 0.4+VAN 35+STR 2    |       |        |        |        |        |        |        |
| Median (n=3)            | 83.56 | 101.51 | 68.7   | 39.43  | 52.72  | 62.63  | 9.96   |
| Max                     | 84.06 | 106.55 | 74.31  | 79.8   | 60.44  | 66.75  | 12.77  |
| Min                     | 83.25 | 96.3   | 62.49  | 34.02  | 50.73  | 55.31  | 1.01   |
| DOX 0.4+FUS 80+STR 2    |       |        |        |        |        |        |        |
| Median (n=4)            | 83.81 | 78.5   | 66.71  | 44.455 | 52.96  | 44.865 | 20.595 |
| Max                     | 86.48 | 89.83  | 74.31  | 68.22  | 60.44  | 56.87  | 27.26  |
| Min                     | 83.25 | 71.27  | 62.49  | 34.51  | 50.73  | 37.72  | 16.68  |
| VAN 75+TMP 0.07+AMP 1.2 |       |        |        |        |        |        |        |
| Median (n=7)            | 109.3 | 70     | 72.1   | 1.2    | 53.4   | 3.9    | 1.2    |
| Max                     | 119.6 | 85.9   | 115.7  | 49.8   | 62     | 8.2    | 1.4    |
| Min                     | 104.1 | 60.7   | 61     | 0.9    | 49.6   | 1.2    | 1      |

| <i>S. epidermidis</i> 14990 |        |       |        |       |        |       |        |
|-----------------------------|--------|-------|--------|-------|--------|-------|--------|
| AMP 0.3+CHL 120+CLI 0.04    |        |       |        |       |        |       |        |
| Median (n=32)               | 86.85  | 84.63 | 99.43  | 28.79 | 95.77  | 63.16 | -7.58  |
| Max                         | 152.63 | 91.82 | 128.75 | 72.20 | 120.33 | 73.49 | 1.73   |
| Min                         | 54.14  | 79.26 | 85.73  | 4.35  | 62.47  | 49.41 | -10.46 |
| AMP 0.3+CHL 120+CPR 0.2     |        |       |        |       |        |       |        |
| Median (n=32)               | 86.85  | 84.63 | 78.04  | 28.79 | 66.20  | 46.87 | 2.67   |
| Max                         | 152.63 | 91.82 | 89.38  | 72.20 | 73.42  | 54.46 | 8.32   |
| Min                         | 54.14  | 79.26 | 61.17  | 4.35  | 64.16  | 40.09 | -4.62  |
| AMP 0.3+CHL 120+DOX 1       |        |       |        |       |        |       |        |
| Median (n=32)               | 86.85  | 84.63 | 95.35  | 28.79 | 25.36  | 14.23 | -9.25  |
| Max                         | 152.63 | 91.82 | 109.79 | 72.20 | 39.29  | 22.72 | 0.84   |
| Min                         | 54.14  | 79.26 | 83.39  | 4.35  | 12.82  | 8.10  | -15.84 |
| AMP 0.3+CHL 120+ERY 0.08    |        |       |        |       |        |       |        |
| Median (n=32)               | 86.85  | 84.63 | 75.48  | 28.79 | 51.70  | 63.86 | -9.01  |
| Max                         | 152.63 | 91.82 | 81.90  | 72.20 | 89.47  | 86.13 | 51.48  |
| Min                         | 54.14  | 79.26 | 71.57  | 4.35  | 20.35  | 39.91 | -16.64 |
| AMP 0.3+CHL 120+FOX 0.7     |        |       |        |       |        |       |        |

|                          |        |       |        |       |        |       |        |
|--------------------------|--------|-------|--------|-------|--------|-------|--------|
| Median (n=32)            | 86.85  | 84.63 | 75.22  | 28.79 | 69.31  | 55.83 | -11.37 |
| Max                      | 152.63 | 91.82 | 113.77 | 72.20 | 120.28 | 70.61 | -2.31  |
| Min                      | 54.14  | 79.26 | 69.35  | 4.35  | 61.17  | 42.49 | -16.54 |
| AMP 0.3+CHL 120+FUS 0.02 |        |       |        |       |        |       |        |
| Median (n=32)            | 86.85  | 84.63 | 95.69  | 28.79 | 86.57  | 56.79 | -6.83  |
| Max                      | 152.63 | 91.82 | 131.31 | 72.20 | 145.18 | 64.81 | 45.41  |
| Min                      | 54.14  | 79.26 | 68.66  | 4.35  | 79.14  | 30.44 | -14.20 |
| AMP 0.3+CHL 120+GEN 0.25 |        |       |        |       |        |       |        |
| Median (n=32)            | 86.85  | 84.63 | 85.43  | 28.79 | 86.68  | 47.99 | -10.65 |
| Max                      | 152.63 | 91.82 | 104.78 | 72.20 | 95.54  | 58.56 | -7.80  |
| Min                      | 54.14  | 79.26 | 66.01  | 4.35  | 83.72  | 33.53 | -12.71 |
| AMP 0.3+CHL 120+TMP 5    |        |       |        |       |        |       |        |
| Median (n=32)            | 86.85  | 84.63 | 55.81  | 28.79 | 57.40  | 50.04 | 0.89   |
| Max                      | 152.63 | 91.82 | 60.53  | 72.20 | 67.17  | 69.42 | 16.68  |
| Min                      | 54.14  | 79.26 | 51.17  | 4.35  | 46.24  | 41.30 | -6.55  |
| AMP 0.3+CHL 120+TOB 0.2  |        |       |        |       |        |       |        |
| Median (n=32)            | 86.85  | 84.63 | 97.75  | 28.79 | 106.89 | 68.21 | 1.54   |
| Max                      | 152.63 | 91.82 | 136.91 | 72.20 | 140.00 | 81.29 | 41.88  |
| Min                      | 54.14  | 79.26 | 69.31  | 4.35  | 83.79  | 48.32 | -7.49  |

|                           |        |        |        |        |        |        |        |
|---------------------------|--------|--------|--------|--------|--------|--------|--------|
| AMP 0.3+CLI 0.04+DOX 1    |        |        |        |        |        |        |        |
| Median (n=32)             | 86.85  | 99.43  | 95.36  | 95.77  | 25.36  | 18.98  | -3.89  |
| Max                       | 152.63 | 128.75 | 109.79 | 120.33 | 39.29  | 22.69  | 11.92  |
| Min                       | 54.14  | 85.73  | 83.39  | 62.47  | 12.82  | 12.25  | -14.89 |
| AMP 0.3+CLI 0.04+ERY 0.08 |        |        |        |        |        |        |        |
| Median (n=32)             | 86.85  | 99.43  | 75.48  | 95.77  | 51.70  | 100.16 | 17.20  |
| Max                       | 152.63 | 128.75 | 81.90  | 120.33 | 89.47  | 110.96 | 98.94  |
| Min                       | 54.14  | 85.73  | 71.57  | 62.47  | 20.35  | 68.66  | 8.73   |
| AMP 0.3+CLI 0.04+FOX 0.7  |        |        |        |        |        |        |        |
| Median (n=32)             | 86.85  | 99.43  | 75.22  | 95.77  | 69.31  | 67.51  | 33.47  |
| Max                       | 152.63 | 128.75 | 113.77 | 120.33 | 120.28 | 111.52 | 88.90  |
| Min                       | 54.14  | 85.73  | 69.35  | 62.47  | 61.17  | 60.84  | 17.53  |
| AMP 0.3+CLI 0.04+FUS 0.02 |        |        |        |        |        |        |        |
| Median (n=32)             | 86.85  | 99.43  | 95.69  | 95.77  | 86.57  | 94.56  | 44.05  |
| Max                       | 152.63 | 128.75 | 131.31 | 120.33 | 145.18 | 112.05 | 121.66 |
| Min                       | 54.14  | 85.73  | 68.66  | 62.47  | 79.14  | 64.41  | 35.44  |
| AMP 0.3+CLI 0.04+GEN 0.25 |        |        |        |        |        |        |        |
| Median (n=32)             | 86.85  | 99.43  | 85.43  | 95.77  | 86.68  | -1.32  | -10.91 |
| Max                       | 152.63 | 128.75 | 104.78 | 120.33 | 95.54  | 9.55   | -3.73  |

|                          |        |        |        |        |        |        |        |
|--------------------------|--------|--------|--------|--------|--------|--------|--------|
| Min                      | 54.14  | 85.73  | 66.01  | 62.47  | 83.72  | -8.46  | -13.95 |
| AMP 0.3+CLI 0.04+TMP 5   |        |        |        |        |        |        |        |
| Median (n=32)            | 86.85  | 99.43  | 55.81  | 95.77  | 57.40  | 46.99  | 11.55  |
| Max                      | 152.63 | 128.75 | 60.53  | 120.33 | 67.17  | 58.92  | 22.03  |
| Min                      | 54.14  | 85.73  | 51.17  | 62.47  | 46.24  | 33.51  | 6.67   |
| AMP 0.3+CLI 0.04+TOB 0.2 |        |        |        |        |        |        |        |
| Median (n=32)            | 86.85  | 99.43  | 97.75  | 95.77  | 106.89 | 90.92  | 14.68  |
| Max                      | 152.63 | 128.75 | 136.91 | 120.33 | 140.00 | 138.17 | 100.94 |
| Min                      | 54.14  | 85.73  | 69.31  | 62.47  | 83.79  | 64.61  | 5.99   |
| AMP 0.3+CLI 0.04+CPR 0.2 |        |        |        |        |        |        |        |
| Median (n=32)            | 86.85  | 99.43  | 78.04  | 95.77  | 66.20  | 49.17  | 48.96  |
| Max                      | 152.63 | 128.75 | 89.38  | 120.33 | 73.42  | 54.56  | 60.00  |
| Min                      | 54.14  | 85.73  | 61.17  | 62.47  | 64.16  | 36.92  | 38.49  |
| AMP 0.3+CPR 0.2+DOX 1    |        |        |        |        |        |        |        |
| Median (n=32)            | 86.85  | 78.04  | 95.36  | 66.20  | 25.36  | 47.05  | 1.44   |
| Max                      | 152.63 | 89.38  | 109.79 | 73.42  | 39.29  | 54.20  | 12.28  |
| Min                      | 54.14  | 61.17  | 83.39  | 64.16  | 12.82  | 44.87  | -6.53  |
| AMP 0.3+CPR 0.2+ERY 0.08 |        |        |        |        |        |        |        |
| Median (n=32)            | 86.85  | 78.04  | 75.48  | 66.20  | 51.70  | 62.04  | 24.63  |



|                          |        |       |        |       |        |       |       |
|--------------------------|--------|-------|--------|-------|--------|-------|-------|
| Max                      | 152.63 | 89.38 | 81.90  | 73.42 | 89.47  | 66.43 | 34.71 |
| Min                      | 54.14  | 61.17 | 71.57  | 64.16 | 20.35  | 52.16 | 8.07  |
| AMP 0.3+CPR 0.2+FOX 0.7  |        |       |        |       |        |       |       |
| Median (n=32)            | 86.85  | 78.04 | 75.22  | 66.20 | 69.31  | 53.73 | 38.62 |
| Max                      | 152.63 | 89.38 | 113.77 | 73.42 | 120.28 | 63.56 | 43.07 |
| Min                      | 54.14  | 61.17 | 69.35  | 64.16 | 61.17  | 46.84 | 30.26 |
| AMP 0.3+CPR 0.2+FUS 0.02 |        |       |        |       |        |       |       |
| Median (n=32)            | 86.85  | 78.04 | 95.69  | 66.20 | 86.57  | 74.68 | 62.02 |
| Max                      | 152.63 | 89.38 | 131.31 | 73.42 | 145.18 | 87.86 | 77.31 |
| Min                      | 54.14  | 61.17 | 68.66  | 64.16 | 79.14  | 61.49 | 54.49 |
| AMP 0.3+CPR 0.2+GEN 0.25 |        |       |        |       |        |       |       |
| Median (n=32)            | 86.85  | 78.04 | 85.43  | 66.20 | 86.68  | 45.17 | 21.13 |
| Max                      | 152.63 | 89.38 | 104.78 | 73.42 | 95.54  | 54.75 | 48.68 |
| Min                      | 54.14  | 61.17 | 66.01  | 64.16 | 83.72  | 32.60 | 12.67 |
| AMP 0.3+CPR 0.2+TMP 5    |        |       |        |       |        |       |       |
| Median (n=32)            | 86.85  | 78.04 | 55.82  | 66.20 | 57.40  | 39.13 | 1.72  |
| Max                      | 152.63 | 89.38 | 60.53  | 73.42 | 67.17  | 47.03 | 16.13 |
| Min                      | 54.14  | 61.17 | 51.17  | 64.16 | 46.24  | 31.59 | -5.91 |
| AMP 0.3+CPR 0.2+TOB 0.2  |        |       |        |       |        |       |       |

|                        |        |        |        |       |        |       |        |
|------------------------|--------|--------|--------|-------|--------|-------|--------|
| Median (n=32)          | 86.85  | 78.04  | 97.75  | 66.20 | 106.89 | 52.41 | 61.56  |
| Max                    | 152.63 | 89.38  | 136.91 | 73.42 | 140.00 | 59.02 | 67.24  |
| Min                    | 54.14  | 61.17  | 69.31  | 64.16 | 83.79  | 45.63 | 54.01  |
| AMP 0.3+DOX 1+FOX 0.7  |        |        |        |       |        |       |        |
| Median (n=32)          | 86.85  | 95.36  | 75.22  | 25.36 | 69.31  | 46.36 | -0.68  |
| Max                    | 152.63 | 109.79 | 113.77 | 39.29 | 120.28 | 52.62 | 5.48   |
| Min                    | 54.14  | 83.39  | 69.35  | 12.82 | 61.17  | 34.79 | -9.12  |
| AMP 0.3+DOX 1+FUS 0.02 |        |        |        |       |        |       |        |
| Median (n=32)          | 86.85  | 95.36  | 95.69  | 25.36 | 86.57  | 47.93 | 13.14  |
| Max                    | 152.63 | 109.79 | 131.31 | 39.29 | 145.18 | 68.27 | 20.17  |
| Min                    | 54.14  | 83.39  | 68.66  | 12.82 | 79.14  | 38.52 | -13.52 |
| AMP 0.3+DOX 1+GEN 0.25 |        |        |        |       |        |       |        |
| Median (n=32)          | 86.85  | 95.36  | 85.43  | 25.36 | 86.68  | 50.80 | 3.11   |
| Max                    | 152.63 | 109.79 | 104.78 | 39.29 | 95.54  | 73.19 | 11.46  |
| Min                    | 54.14  | 83.39  | 66.01  | 12.82 | 83.72  | 29.08 | -11.82 |
| AMP 0.3+DOX 1+TMP 5    |        |        |        |       |        |       |        |
| Median (n=32)          | 86.85  | 95.36  | 55.82  | 25.36 | 57.40  | 50.31 | -2.75  |
| Max                    | 152.63 | 109.79 | 60.53  | 39.29 | 67.17  | 73.34 | 3.78   |
| Min                    | 54.14  | 83.39  | 51.17  | 12.82 | 46.24  | 40.37 | -7.41  |

|                           |        |        |        |       |        |       |        |
|---------------------------|--------|--------|--------|-------|--------|-------|--------|
| AMP 0.3+DOX 1+TOB 0.2     |        |        |        |       |        |       |        |
| Median (n=32)             | 86.85  | 95.36  | 97.75  | 25.36 | 106.89 | 75.77 | 2.97   |
| Max                       | 152.63 | 109.79 | 136.91 | 39.29 | 140.00 | 86.50 | 11.76  |
| Min                       | 54.14  | 83.39  | 69.31  | 12.82 | 83.79  | 72.31 | -2.33  |
| AMP 0.3+TMP 5+TOB 0.2     |        |        |        |       |        |       |        |
| Median (n=32)             | 86.85  | 55.82  | 97.75  | 57.40 | 106.89 | 59.58 | 52.99  |
| Max                       | 152.63 | 60.53  | 136.91 | 67.17 | 140.00 | 68.60 | 71.80  |
| Min                       | 54.14  | 51.17  | 69.31  | 46.24 | 83.79  | 57.47 | 3.61   |
| AMP 0.3+ERY 0.08+FOX 0.7  |        |        |        |       |        |       |        |
| Median (n=32)             | 86.85  | 75.48  | 75.22  | 51.70 | 69.31  | 82.63 | -4.91  |
| Max                       | 152.63 | 81.90  | 113.77 | 89.47 | 120.28 | 93.07 | 84.26  |
| Min                       | 54.14  | 71.57  | 69.35  | 20.35 | 61.17  | 53.44 | -10.81 |
| AMP 0.3+ERY 0.08+FUS 0.02 |        |        |        |       |        |       |        |
| Median (n=32)             | 86.85  | 75.48  | 95.69  | 51.70 | 86.57  | 77.41 | -4.68  |
| Max                       | 152.63 | 81.90  | 131.31 | 89.47 | 145.18 | 96.39 | 81.68  |
| Min                       | 54.14  | 71.57  | 68.66  | 20.35 | 79.14  | 64.57 | -7.79  |
| AMP 0.3+ERY 0.08+GEN 0.25 |        |        |        |       |        |       |        |
| Median (n=32)             | 86.85  | 75.48  | 85.43  | 51.70 | 86.68  | 46.29 | -7.38  |
| Max                       | 152.63 | 81.90  | 104.78 | 89.47 | 95.54  | 72.96 | 4.88   |

|                          |        |        |        |        |        |        |        |
|--------------------------|--------|--------|--------|--------|--------|--------|--------|
| Min                      | 54.14  | 71.57  | 66.01  | 20.35  | 83.72  | 11.61  | -13.30 |
| AMP 0.3+ERY 0.08+TMP 5   |        |        |        |        |        |        |        |
| Median (n=32)            | 86.85  | 75.48  | 55.82  | 51.70  | 57.40  | 21.30  | -16.06 |
| Max                      | 152.63 | 81.90  | 60.53  | 89.47  | 67.17  | 41.77  | -14.33 |
| Min                      | 54.14  | 71.57  | 51.17  | 20.35  | 46.24  | 10.06  | -20.91 |
| AMP 0.3+ERY 0.08+TOB 0.2 |        |        |        |        |        |        |        |
| Median (n=32)            | 86.85  | 75.48  | 97.75  | 51.70  | 106.89 | 94.59  | 24.44  |
| Max                      | 152.63 | 81.90  | 136.91 | 89.47  | 140.00 | 111.44 | 70.85  |
| Min                      | 54.14  | 71.57  | 69.31  | 20.35  | 83.79  | 68.61  | 9.94   |
| AMP 0.3+FOX 0.7+FUS 0.02 |        |        |        |        |        |        |        |
| Median (n=32)            | 86.85  | 75.22  | 95.69  | 69.31  | 86.57  | 86.05  | 63.34  |
| Max                      | 152.63 | 113.77 | 131.31 | 120.28 | 145.18 | 95.12  | 128.33 |
| Min                      | 54.14  | 69.35  | 68.66  | 61.17  | 79.14  | 75.21  | 50.97  |
| AMP 0.3+FOX 0.7+TMP 5    |        |        |        |        |        |        |        |
| Median (n=32)            | 86.85  | 75.22  | 55.82  | 69.31  | 57.40  | 40.97  | -9.77  |
| Max                      | 152.63 | 113.77 | 60.53  | 120.28 | 67.17  | 51.39  | 5.21   |
| Min                      | 54.14  | 69.35  | 51.17  | 61.17  | 46.24  | 33.23  | -20.25 |
| AMP 0.3+FOX 0.7+TOB 0.2  |        |        |        |        |        |        |        |
| Median (n=32)            | 86.85  | 75.22  | 97.75  | 69.31  | 106.89 | 103.02 | 59.28  |

|                           |        |        |        |        |        |        |        |
|---------------------------|--------|--------|--------|--------|--------|--------|--------|
| Max                       | 152.63 | 113.77 | 136.91 | 120.28 | 140.00 | 124.11 | 92.37  |
| Min                       | 54.14  | 69.35  | 69.31  | 61.17  | 83.79  | 78.38  | 54.92  |
| DOX 1+FOX 0.7+GEN 0.25    |        |        |        |        |        |        |        |
| Median (n=16)             | 95.35  | 75.22  | 85.44  | 46.36  | 50.80  | 60.15  | 24.19  |
| Max                       | 109.79 | 113.77 | 104.78 | 52.62  | 73.19  | 66.12  | 42.70  |
| Min                       | 83.39  | 69.35  | 66.01  | 34.79  | 29.08  | 53.36  | 5.18   |
| DOX 1+FOX 0.7+TMP 5       |        |        |        |        |        |        |        |
| Median (n=8)              | 95.35  | 75.22  | 55.82  | 46.36  | 50.31  | 40.97  | 26.20  |
| Max                       | 109.79 | 113.77 | 60.53  | 52.62  | 73.34  | 51.39  | 34.03  |
| Min                       | 83.39  | 69.35  | 51.17  | 34.79  | 40.37  | 33.23  | 23.24  |
| DOX 1+FOX 0.7+TOB 0.2     |        |        |        |        |        |        |        |
| Median (n=32)             | 95.35  | 75.22  | 97.75  | 46.36  | 75.77  | 103.02 | 43.51  |
| Max                       | 109.79 | 113.77 | 136.91 | 52.62  | 86.50  | 124.11 | 49.94  |
| Min                       | 83.39  | 69.35  | 69.31  | 34.79  | 72.31  | 78.38  | 39.59  |
| DOX 1+FOX 0.7+VAN 0.5     |        |        |        |        |        |        |        |
| Median (n=32)             | 95.35  | 75.22  | 94.89  | 46.36  | 62.73  | 80.06  | -19.15 |
| Max                       | 109.79 | 113.77 | 132.58 | 52.62  | 86.12  | 86.92  | -11.07 |
| Min                       | 83.39  | 69.35  | 62.31  | 34.79  | 50.67  | -4.66  | -24.54 |
| AMP 0.3+FUS 0.02+GEN 0.25 |        |        |        |        |        |        |        |

|                          |        |        |        |        |        |        |       |
|--------------------------|--------|--------|--------|--------|--------|--------|-------|
| Median (n=32)            | 86.85  | 95.69  | 85.44  | 86.57  | 86.68  | 81.45  | 64.21 |
| Max                      | 152.63 | 131.31 | 104.78 | 145.18 | 95.54  | 91.84  | 90.34 |
| Min                      | 54.14  | 68.66  | 66.01  | 79.14  | 83.72  | 66.37  | 34.74 |
| AMP 0.3+FUS 0.02+TMP 5   |        |        |        |        |        |        |       |
| Median (n=32)            | 86.85  | 95.69  | 55.82  | 86.57  | 57.40  | 69.21  | 48.62 |
| Max                      | 152.63 | 131.31 | 60.53  | 145.18 | 67.17  | 78.25  | 67.47 |
| Min                      | 54.14  | 68.66  | 51.17  | 79.14  | 46.24  | 67.05  | 26.43 |
| AMP 0.3+FUS 0.02+TOB 0.2 |        |        |        |        |        |        |       |
| Median (n=32)            | 86.85  | 95.69  | 97.75  | 86.57  | 106.89 | 88.95  | 79.27 |
| Max                      | 152.63 | 131.31 | 136.91 | 145.18 | 140.00 | 103.73 | 87.81 |
| Min                      | 54.14  | 68.66  | 69.31  | 79.14  | 83.79  | 70.58  | 73.13 |
| DOX 1+FOX 0.7+FUS 0.02   |        |        |        |        |        |        |       |
| Median (n=16)            | 95.35  | 75.22  | 95.69  | 46.36  | 47.93  | 86.05  | 29.36 |
| Max                      | 109.79 | 113.77 | 131.31 | 52.62  | 68.27  | 95.12  | 75.14 |
| Min                      | 83.39  | 69.35  | 68.66  | 34.79  | 38.52  | 75.21  | 22.54 |
| DOX 1+FUS 0.02+TMP 5     |        |        |        |        |        |        |       |
| Median (n=16)            | 95.35  | 95.69  | 55.82  | 47.93  | 48.50  | 50.63  | 39.92 |
| Max                      | 109.79 | 131.31 | 60.53  | 68.27  | 57.58  | 68.78  | 42.80 |
| Min                      | 83.39  | 68.66  | 51.17  | 38.52  | 31.99  | 38.72  | 35.67 |

|                                 |        |        |        |        |        |        |       |
|---------------------------------|--------|--------|--------|--------|--------|--------|-------|
| <b>DOX 1+FUS 0.02+TOB 0.2</b>   |        |        |        |        |        |        |       |
| Median (n=32)                   | 95.35  | 95.69  | 97.75  | 47.93  | 70.76  | 88.95  | 19.29 |
| Max                             | 109.79 | 131.31 | 136.91 | 68.27  | 89.44  | 103.73 | 26.71 |
| Min                             | 83.39  | 68.66  | 69.31  | 38.52  | 22.61  | 70.58  | 7.78  |
| <b>DOX 1+FUS 0.02+VAN 0.5</b>   |        |        |        |        |        |        |       |
| Median (n=32)                   | 95.35  | 95.69  | 94.89  | 47.93  | 62.73  | 109.37 | 33.93 |
| Max                             | 109.79 | 131.31 | 132.58 | 68.27  | 86.12  | 124.39 | 41.00 |
| Min                             | 83.39  | 68.66  | 62.31  | 38.52  | 50.67  | 92.71  | 22.17 |
| <b>AMP 0.3+FOX 0.7+GEN 0.25</b> |        |        |        |        |        |        |       |
| Median (n=32)                   | 86.85  | 75.22  | 85.44  | 69.31  | 86.68  | 60.15  | 56.20 |
| Max                             | 152.63 | 113.77 | 104.78 | 120.28 | 95.54  | 66.12  | 69.41 |
| Min                             | 54.14  | 69.35  | 66.01  | 61.17  | 83.72  | 53.36  | 43.26 |
| <b>AMP 0.3+GEN 0.25+TMP 5</b>   |        |        |        |        |        |        |       |
| Median (n=32)                   | 86.85  | 85.44  | 55.82  | 86.69  | 57.40  | 51.37  | 35.41 |
| Max                             | 152.63 | 104.78 | 60.53  | 95.54  | 67.17  | 61.62  | 42.27 |
| Min                             | 54.14  | 66.01  | 51.17  | 83.72  | 46.24  | 38.92  | 31.08 |
| <b>AMP 0.3+GEN 0.25+TOB 0.2</b> |        |        |        |        |        |        |       |
| Median (n=32)                   | 86.85  | 85.44  | 97.75  | 86.69  | 106.89 | 57.79  | 32.31 |
| Max                             | 152.63 | 104.78 | 136.91 | 95.54  | 140.00 | 71.29  | 45.19 |

|                          |        |        |        |       |       |       |        |
|--------------------------|--------|--------|--------|-------|-------|-------|--------|
| Min                      | 54.14  | 66.01  | 69.31  | 83.72 | 83.79 | -6.01 | 26.73  |
| DOX 1+FUS 0.02+GEN 0.25  |        |        |        |       |       |       |        |
| Median (n=16)            | 95.35  | 95.69  | 85.44  | 47.93 | 50.80 | 81.45 | -2.96  |
| Max                      | 109.79 | 131.31 | 104.78 | 68.27 | 73.19 | 91.84 | 2.83   |
| Min                      | 83.39  | 68.66  | 66.01  | 38.52 | 29.08 | 66.37 | -14.39 |
| DOX 1+GEN 0.25+TMP 5     |        |        |        |       |       |       |        |
| Median (n=16)            | 95.35  | 85.44  | 55.82  | 50.80 | 48.50 | 51.37 | 30.79  |
| Max                      | 109.79 | 104.78 | 60.53  | 73.19 | 57.58 | 61.62 | 35.55  |
| Min                      | 83.39  | 66.01  | 51.17  | 29.08 | 31.99 | 38.92 | 18.92  |
| DOX 1+GEN 0.25+TOB 0.2   |        |        |        |       |       |       |        |
| Median (n=32)            | 95.35  | 85.44  | 97.75  | 50.80 | 75.77 | 57.79 | 4.02   |
| Max                      | 109.79 | 104.78 | 136.91 | 73.19 | 86.50 | 71.29 | 16.08  |
| Min                      | 83.39  | 66.01  | 69.31  | 29.08 | 72.31 | -6.01 | -4.18  |
| DOX 1+GEN 0.25+VAN 0.5   |        |        |        |       |       |       |        |
| Median (n=32)            | 95.35  | 85.44  | 94.89  | 50.80 | 62.73 | 60.44 | 13.63  |
| Max                      | 109.79 | 104.78 | 132.58 | 73.19 | 86.12 | 80.56 | 16.95  |
| Min                      | 83.39  | 66.01  | 62.31  | 29.08 | 50.67 | -3.66 | 7.14   |
| CHL 120+CLI 0.04+STR 2.8 |        |        |        |       |       |       |        |
| Median (n=16)            | 84.63  | 99.43  | 71.19  | 63.16 | 64.53 | 81.21 | 29.29  |



|                          |       |        |        |       |       |        |       |
|--------------------------|-------|--------|--------|-------|-------|--------|-------|
| Max                      | 91.82 | 128.75 | 105.54 | 73.49 | 87.71 | 87.93  | 57.97 |
| Min                      | 79.26 | 85.73  | 18.56  | 49.41 | 46.40 | 8.12   | 0.78  |
| CHL 120+CLI 0.04+TMP 5   |       |        |        |       |       |        |       |
| Median (n=8)             | 84.63 | 99.43  | 55.82  | 63.16 | 50.04 | 46.99  | 31.36 |
| Max                      | 91.82 | 128.75 | 60.53  | 73.49 | 69.42 | 58.92  | 40.63 |
| Min                      | 79.26 | 85.73  | 51.17  | 49.41 | 41.30 | 33.51  | 14.53 |
| CHL 120+CLI 0.04+TOB 0.2 |       |        |        |       |       |        |       |
| Median (n=32)            | 84.63 | 99.43  | 97.75  | 63.16 | 68.21 | 90.92  | 53.67 |
| Max                      | 91.82 | 128.75 | 136.91 | 73.49 | 81.29 | 138.17 | 72.37 |
| Min                      | 79.26 | 85.73  | 69.31  | 49.41 | 48.32 | 64.61  | 26.52 |
| CHL 120+CLI 0.04+VAN 0.5 |       |        |        |       |       |        |       |
| Median (n=32)            | 84.63 | 99.43  | 94.89  | 63.16 | 64.60 | 105.83 | 44.85 |
| Max                      | 91.82 | 128.75 | 132.58 | 73.49 | 68.18 | 146.82 | 61.51 |
| Min                      | 79.26 | 85.73  | 62.31  | 49.41 | 56.68 | 68.49  | 9.07  |
| CPR 0.2+GEN 0.25+TMP 5   |       |        |        |       |       |        |       |
| Median (n=16)            | 78.04 | 85.44  | 55.82  | 45.17 | 37.24 | 51.37  | 7.56  |
| Max                      | 89.38 | 104.78 | 60.53  | 54.75 | 48.85 | 61.62  | 18.06 |
| Min                      | 61.17 | 66.01  | 51.17  | 32.60 | 22.81 | 38.92  | 1.01  |
| CPR 0.2+GEN 0.25+TOB 0.2 |       |        |        |       |       |        |       |

|                          |       |        |        |       |       |       |        |
|--------------------------|-------|--------|--------|-------|-------|-------|--------|
| Median (n=32)            | 78.04 | 85.44  | 97.75  | 45.17 | 52.41 | 57.79 | 1.36   |
| Max                      | 89.38 | 104.78 | 136.91 | 54.75 | 59.02 | 71.29 | 13.59  |
| Min                      | 61.17 | 66.01  | 69.31  | 32.60 | 45.63 | -6.01 | -13.79 |
| CPR 0.2+GEN 0.25+VAN 0.5 |       |        |        |       |       |       |        |
| Median (n=32)            | 78.04 | 85.44  | 94.89  | 45.17 | 58.63 | 60.44 | 17.04  |
| Max                      | 89.38 | 104.78 | 132.58 | 54.75 | 61.45 | 80.56 | 34.29  |
| Min                      | 61.17 | 66.01  | 62.31  | 32.60 | 51.51 | -3.66 | 7.76   |
| CHL 120+CLI 0.04+CPR 0.2 |       |        |        |       |       |       |        |
| Median (n=16)            | 84.63 | 99.43  | 78.04  | 63.16 | 46.87 | 49.17 | 26.28  |
| Max                      | 91.82 | 128.75 | 89.38  | 73.49 | 54.46 | 54.56 | 38.54  |
| Min                      | 79.26 | 85.73  | 61.17  | 49.41 | 40.09 | 36.92 | 17.48  |
| CHL 120+CPR 0.2+ERY 0.08 |       |        |        |       |       |       |        |
| Median (n=16)            | 84.63 | 78.04  | 75.48  | 46.87 | 63.86 | 62.04 | 15.42  |
| Max                      | 91.82 | 89.38  | 81.90  | 54.46 | 86.13 | 66.43 | 22.79  |
| Min                      | 79.26 | 61.17  | 71.57  | 40.09 | 39.91 | 52.16 | 5.47   |
| CHL 120+CPR 0.2+FOX 0.7  |       |        |        |       |       |       |        |
| Median (n=16)            | 84.63 | 78.04  | 75.22  | 46.87 | 55.83 | 53.73 | 18.70  |
| Max                      | 91.82 | 89.38  | 113.77 | 54.46 | 70.61 | 63.56 | 35.93  |
| Min                      | 79.26 | 61.17  | 69.35  | 40.09 | 42.49 | 46.84 | 11.74  |

|                                 |       |        |        |       |       |       |       |
|---------------------------------|-------|--------|--------|-------|-------|-------|-------|
| <b>CHL 120+CPR 0.2+FUS 0.02</b> |       |        |        |       |       |       |       |
| Median (n=16)                   | 84.63 | 78.04  | 95.69  | 46.87 | 56.79 | 74.68 | 14.56 |
| Max                             | 91.82 | 89.38  | 131.31 | 54.46 | 64.81 | 87.86 | 22.56 |
| Min                             | 79.26 | 61.17  | 68.66  | 40.09 | 30.44 | 61.49 | 5.02  |
| <b>CHL 120+CPR 0.2+TMP 5</b>    |       |        |        |       |       |       |       |
| Median (n=8)                    | 84.63 | 78.04  | 55.82  | 46.87 | 50.04 | 39.13 | 12.64 |
| Max                             | 91.82 | 89.38  | 60.53  | 54.46 | 69.42 | 47.03 | 21.46 |
| Min                             | 79.26 | 61.17  | 51.17  | 40.09 | 41.30 | 31.59 | 6.03  |
| <b>CHL 120+CPR 0.2+TOB 0.2</b>  |       |        |        |       |       |       |       |
| Median (n=32)                   | 84.63 | 78.04  | 97.75  | 46.87 | 68.21 | 52.41 | 19.80 |
| Max                             | 91.82 | 89.38  | 136.91 | 54.46 | 81.29 | 59.02 | 43.46 |
| Min                             | 79.26 | 61.17  | 69.31  | 40.09 | 48.32 | 45.63 | 16.46 |
| <b>CHL 120+CPR 0.2+VAN 0.5</b>  |       |        |        |       |       |       |       |
| Median (n=32)                   | 84.63 | 78.04  | 94.89  | 46.87 | 64.60 | 58.63 | 5.87  |
| Max                             | 91.82 | 89.38  | 132.58 | 54.46 | 68.18 | 61.45 | 19.69 |
| Min                             | 79.26 | 61.17  | 62.31  | 40.09 | 56.68 | 51.51 | -6.29 |
| <b>CHL 120+CLI 0.04+DOX 1</b>   |       |        |        |       |       |       |       |
| Median (n=16)                   | 84.63 | 99.43  | 95.36  | 63.16 | 14.23 | 18.98 | -4.10 |
| Max                             | 91.82 | 128.75 | 109.79 | 73.49 | 22.72 | 22.69 | 4.31  |

|                        |       |        |        |       |       |       |        |
|------------------------|-------|--------|--------|-------|-------|-------|--------|
| Min                    | 79.26 | 85.73  | 83.39  | 49.41 | 8.10  | 12.25 | -16.24 |
| CHL 120+CPR 0.2+DOX 1  |       |        |        |       |       |       |        |
| Median (n=16)          | 84.63 | 78.04  | 95.36  | 46.87 | 14.23 | 47.05 | 8.30   |
| Max                    | 91.82 | 89.38  | 109.79 | 54.46 | 22.72 | 54.20 | 22.85  |
| Min                    | 79.26 | 61.17  | 83.39  | 40.09 | 8.10  | 44.87 | 2.25   |
| CHL 120+DOX 1+FUS 0.02 |       |        |        |       |       |       |        |
| Median (n=16)          | 84.63 | 95.36  | 95.69  | 14.23 | 56.79 | 47.93 | -3.71  |
| Max                    | 91.82 | 109.79 | 131.31 | 22.72 | 64.81 | 68.27 | 14.40  |
| Min                    | 79.26 | 83.39  | 68.66  | 8.10  | 30.44 | 38.52 | -6.87  |
| CHL 120+DOX 1+TMP 5    |       |        |        |       |       |       |        |
| Median (n=8)           | 84.63 | 95.36  | 55.82  | 14.23 | 50.04 | 50.31 | 0.59   |
| Max                    | 91.82 | 109.79 | 60.53  | 22.72 | 69.42 | 73.34 | 6.05   |
| Min                    | 79.26 | 83.39  | 51.17  | 8.10  | 41.30 | 40.37 | -3.86  |
| CHL 120+DOX 1+TOB 0.2  |       |        |        |       |       |       |        |
| Median (n=32)          | 84.63 | 95.36  | 97.75  | 14.23 | 68.21 | 75.77 | 0.21   |
| Max                    | 91.82 | 109.79 | 136.91 | 22.72 | 81.29 | 86.50 | 3.19   |
| Min                    | 79.26 | 83.39  | 69.31  | 8.10  | 48.32 | 72.31 | -9.64  |
| CHL 120+DOX 1+VAN 0.5  |       |        |        |       |       |       |        |
| Median (n=32)          | 84.63 | 95.36  | 94.89  | 14.23 | 64.60 | 62.73 | -7.80  |

|                           |       |        |        |       |       |        |        |
|---------------------------|-------|--------|--------|-------|-------|--------|--------|
| Max                       | 91.82 | 109.79 | 132.58 | 22.72 | 68.18 | 86.12  | 5.48   |
| Min                       | 79.26 | 83.39  | 62.31  | 8.10  | 56.68 | 50.67  | -13.79 |
| CHL 120+CLI 0.04+ERY 0.08 |       |        |        |       |       |        |        |
| Median (n=16)             | 84.63 | 99.43  | 75.48  | 63.86 | 63.16 | 100.16 | 50.01  |
| Max                       | 91.82 | 128.75 | 81.90  | 86.13 | 73.49 | 110.96 | 77.74  |
| Min                       | 79.26 | 85.73  | 71.57  | 39.91 | 49.41 | 68.66  | 6.16   |
| CHL 120+ERY 0.08+FUS 0.02 |       |        |        |       |       |        |        |
| Median (n=16)             | 84.63 | 75.48  | 95.69  | 63.86 | 56.79 | 77.41  | 50.83  |
| Max                       | 91.82 | 81.90  | 131.31 | 86.13 | 64.81 | 96.39  | 68.78  |
| Min                       | 79.26 | 71.57  | 68.66  | 39.91 | 30.44 | 64.57  | -3.98  |
| CHL 120+ERY 0.08+STR 2.8  |       |        |        |       |       |        |        |
| Median (n=16)             | 84.63 | 75.48  | 71.19  | 63.86 | 64.53 | 79.14  | 47.61  |
| Max                       | 91.82 | 81.90  | 105.54 | 86.13 | 87.71 | 96.35  | 68.65  |
| Min                       | 79.26 | 71.57  | 18.56  | 39.91 | 46.40 | 48.60  | 16.24  |
| CHL 120+ERY 0.08+TMP 5    |       |        |        |       |       |        |        |
| Median (n=8)              | 84.63 | 75.48  | 55.82  | 63.86 | 50.04 | 21.30  | 16.91  |
| Max                       | 91.82 | 81.90  | 60.53  | 86.13 | 69.42 | 41.77  | 22.34  |
| Min                       | 79.26 | 71.57  | 51.17  | 39.91 | 41.30 | 10.06  | 13.80  |
| CHL 120+ERY 0.08+TOB 0.2  |       |        |        |       |       |        |        |

|                          |       |        |        |       |       |        |       |
|--------------------------|-------|--------|--------|-------|-------|--------|-------|
| Median (n=32)            | 84.63 | 75.48  | 97.75  | 63.86 | 68.21 | 94.59  | 55.33 |
| Max                      | 91.82 | 81.90  | 136.91 | 86.13 | 81.29 | 111.44 | 69.75 |
| Min                      | 79.26 | 71.57  | 69.31  | 39.91 | 48.32 | 68.61  | 13.26 |
| CHL 120+ERY 0.08+VAN 0.5 |       |        |        |       |       |        |       |
| Median (n=32)            | 84.63 | 75.48  | 94.89  | 63.86 | 64.60 | 103.91 | 50.71 |
| Max                      | 91.82 | 81.90  | 132.58 | 86.13 | 68.18 | 124.03 | 63.58 |
| Min                      | 79.26 | 71.57  | 62.31  | 39.91 | 56.68 | 92.44  | -3.64 |
| CPR 0.2+TMP 5+TOB 0.2    |       |        |        |       |       |        |       |
| Median (n=32)            | 78.04 | 55.82  | 97.75  | 39.13 | 52.41 | 59.58  | 34.20 |
| Max                      | 89.38 | 60.53  | 136.91 | 47.03 | 59.02 | 68.60  | 47.52 |
| Min                      | 61.17 | 51.17  | 69.31  | 31.59 | 45.63 | 57.47  | 31.07 |
| CHL 120+CLI 0.04+FOX 0.7 |       |        |        |       |       |        |       |
| Median (n=16)            | 84.63 | 99.43  | 75.22  | 63.16 | 55.83 | 67.51  | 48.84 |
| Max                      | 91.82 | 128.75 | 113.77 | 73.49 | 70.61 | 111.52 | 84.24 |
| Min                      | 79.26 | 85.73  | 69.35  | 49.41 | 42.49 | 60.84  | 19.62 |
| CHL 120+DOX 1+FOX 0.7    |       |        |        |       |       |        |       |
| Median (n=16)            | 84.63 | 95.36  | 75.22  | 14.23 | 55.83 | 46.36  | -0.51 |
| Max                      | 91.82 | 109.79 | 113.77 | 22.72 | 70.61 | 52.62  | 15.83 |
| Min                      | 79.26 | 83.39  | 69.35  | 8.10  | 42.49 | 34.79  | -9.97 |

|                          |       |        |        |       |       |        |       |
|--------------------------|-------|--------|--------|-------|-------|--------|-------|
| CHL 120+ERY 0.08+FOX 0.7 |       |        |        |       |       |        |       |
| Median (n=16)            | 84.63 | 75.48  | 75.22  | 63.86 | 55.83 | 82.63  | 41.07 |
| Max                      | 91.82 | 81.90  | 113.77 | 86.13 | 70.61 | 93.07  | 72.75 |
| Min                      | 79.26 | 71.57  | 69.35  | 39.91 | 42.49 | 53.44  | 3.99  |
| CHL 120+FOX 0.7+GEN 0.25 |       |        |        |       |       |        |       |
| Median (n=16)            | 84.63 | 75.22  | 85.44  | 55.83 | 47.99 | 60.15  | 24.42 |
| Max                      | 91.82 | 113.77 | 104.78 | 70.61 | 58.56 | 66.12  | 50.72 |
| Min                      | 79.26 | 69.35  | 66.01  | 42.49 | 33.53 | 53.36  | 9.64  |
| CHL 120+FOX 0.7+STR 2.8  |       |        |        |       |       |        |       |
| Median (n=16)            | 84.63 | 75.22  | 71.19  | 55.83 | 64.53 | 65.35  | 42.33 |
| Max                      | 91.82 | 113.77 | 105.54 | 70.61 | 87.71 | 88.02  | 53.16 |
| Min                      | 79.26 | 69.35  | 18.56  | 42.49 | 46.40 | 53.01  | 12.35 |
| CHL 120+FOX 0.7+TMP 5    |       |        |        |       |       |        |       |
| Median (n=8)             | 84.63 | 75.22  | 55.82  | 55.83 | 50.04 | 40.97  | 28.32 |
| Max                      | 91.82 | 113.77 | 60.53  | 70.61 | 69.42 | 51.39  | 36.03 |
| Min                      | 79.26 | 69.35  | 51.17  | 42.49 | 41.30 | 33.23  | 24.82 |
| CHL 120+FOX 0.7+TOB 0.2  |       |        |        |       |       |        |       |
| Median (n=32)            | 84.63 | 75.22  | 97.75  | 55.83 | 68.21 | 103.02 | 51.33 |
| Max                      | 91.82 | 113.77 | 136.91 | 70.61 | 81.29 | 124.11 | 63.07 |

|                                  |       |        |        |       |       |       |        |
|----------------------------------|-------|--------|--------|-------|-------|-------|--------|
| Min                              | 79.26 | 69.35  | 69.31  | 42.49 | 48.32 | 78.38 | 41.81  |
| <b>CHL 120+FOX 0.7+VAN 0.5</b>   |       |        |        |       |       |       |        |
| Median (n=32)                    | 84.63 | 75.22  | 94.89  | 55.83 | 64.60 | 80.06 | 34.93  |
| Max                              | 91.82 | 113.77 | 132.58 | 70.61 | 68.18 | 86.92 | 50.54  |
| Min                              | 79.26 | 69.35  | 62.31  | 42.49 | 56.68 | -4.66 | -10.63 |
| <b>ERY 0.08+FOX 0.7+FUS 0.02</b> |       |        |        |       |       |       |        |
| Median (n=16)                    | 75.48 | 75.22  | 95.69  | 82.63 | 77.41 | 86.05 | 74.63  |
| Max                              | 81.90 | 113.77 | 131.31 | 93.07 | 96.39 | 95.12 | 79.89  |
| Min                              | 71.57 | 69.35  | 68.66  | 53.44 | 64.57 | 75.21 | 68.58  |
| <b>ERY 0.08+FOX 0.7+GEN 0.25</b> |       |        |        |       |       |       |        |
| Median (n=16)                    | 75.48 | 75.22  | 85.44  | 82.63 | 46.29 | 60.15 | 38.58  |
| Max                              | 81.90 | 113.77 | 104.78 | 93.07 | 72.96 | 66.12 | 65.24  |
| Min                              | 71.57 | 69.35  | 66.01  | 53.44 | 11.61 | 53.36 | 23.67  |
| <b>ERY 0.08+FOX 0.7+STR 2.8</b>  |       |        |        |       |       |       |        |
| Median (n=16)                    | 75.48 | 75.22  | 71.19  | 82.63 | 79.14 | 65.35 | 63.74  |
| Max                              | 81.90 | 113.77 | 105.54 | 93.07 | 96.35 | 88.02 | 74.14  |
| Min                              | 71.57 | 69.35  | 18.56  | 53.44 | 48.60 | 53.01 | 9.23   |
| <b>ERY 0.08+FOX 0.7+TMP 5</b>    |       |        |        |       |       |       |        |
| Median (n=8)                     | 75.48 | 75.22  | 55.82  | 82.63 | 21.30 | 40.97 | 25.01  |



|                           |       |        |        |       |        |        |       |
|---------------------------|-------|--------|--------|-------|--------|--------|-------|
| Max                       | 81.90 | 113.77 | 60.53  | 93.07 | 41.77  | 51.39  | 38.95 |
| Min                       | 71.57 | 69.35  | 51.17  | 53.44 | 10.06  | 33.23  | 4.50  |
| ERY 0.08+FOX 0.7+TOB 0.2  |       |        |        |       |        |        |       |
| Median (n=32)             | 75.48 | 75.22  | 97.75  | 82.63 | 94.59  | 103.02 | 83.63 |
| Max                       | 81.90 | 113.77 | 136.91 | 93.07 | 111.44 | 124.11 | 90.67 |
| Min                       | 71.57 | 69.35  | 69.31  | 53.44 | 68.61  | 78.38  | 71.52 |
| ERY 0.08+FOX 0.7+VAN 0.5  |       |        |        |       |        |        |       |
| Median (n=32)             | 75.48 | 75.22  | 94.89  | 82.63 | 103.91 | 80.06  | 70.67 |
| Max                       | 81.90 | 113.77 | 132.58 | 93.07 | 124.03 | 86.92  | 76.84 |
| Min                       | 71.57 | 69.35  | 62.31  | 53.44 | 92.44  | -4.66  | 58.84 |
| CHL 120+CLI 0.04+FUS 0.02 |       |        |        |       |        |        |       |
| Median (n=16)             | 84.63 | 99.43  | 95.69  | 63.16 | 56.79  | 94.56  | 49.76 |
| Max                       | 91.82 | 128.75 | 131.31 | 73.49 | 64.81  | 112.05 | 76.03 |
| Min                       | 79.26 | 85.73  | 68.66  | 49.41 | 30.44  | 64.41  | 2.00  |
| CHL 120+FOX 0.7+FUS 0.02  |       |        |        |       |        |        |       |
| Median (n=16)             | 84.63 | 75.22  | 95.69  | 55.83 | 56.79  | 86.05  | 39.77 |
| Max                       | 91.82 | 113.77 | 131.31 | 70.61 | 64.81  | 95.12  | 52.14 |
| Min                       | 79.26 | 69.35  | 68.66  | 42.49 | 30.44  | 75.21  | 0.62  |
| CHL 120+FUS 0.02+STR 2.8  |       |        |        |       |        |        |       |

|                           |       |        |        |       |       |        |       |
|---------------------------|-------|--------|--------|-------|-------|--------|-------|
| Median (n=16)             | 84.63 | 95.69  | 71.19  | 56.79 | 64.53 | 20.03  | 30.11 |
| Max                       | 91.82 | 131.31 | 105.54 | 64.81 | 87.71 | 84.73  | 56.94 |
| Min                       | 79.26 | 68.66  | 18.56  | 30.44 | 46.40 | 3.26   | 2.71  |
| CHL 120+FUS 0.02+TMP 5    |       |        |        |       |       |        |       |
| Median (n=16)             | 84.63 | 95.69  | 55.82  | 56.79 | 50.04 | 50.63  | 15.24 |
| Max                       | 91.82 | 131.31 | 60.53  | 64.81 | 69.42 | 68.78  | 36.87 |
| Min                       | 79.26 | 68.66  | 51.17  | 30.44 | 41.30 | 38.72  | 3.84  |
| CHL 120+FUS 0.02+TOB 0.2  |       |        |        |       |       |        |       |
| Median (n=32)             | 84.63 | 95.69  | 97.75  | 56.79 | 68.21 | 88.95  | 44.74 |
| Max                       | 91.82 | 131.31 | 136.91 | 64.81 | 81.29 | 103.73 | 58.53 |
| Min                       | 79.26 | 68.66  | 69.31  | 30.44 | 48.32 | 70.58  | 35.96 |
| CHL 120+FUS 0.02+VAN 0.5  |       |        |        |       |       |        |       |
| Median (n=32)             | 84.63 | 95.69  | 94.89  | 56.79 | 64.60 | 109.37 | 43.77 |
| Max                       | 91.82 | 131.31 | 132.58 | 64.81 | 68.18 | 124.39 | 56.32 |
| Min                       | 79.26 | 68.66  | 62.31  | 30.44 | 56.68 | 92.71  | 33.11 |
| ERY 0.08+FUS 0.02+STR 2.8 |       |        |        |       |       |        |       |
| Median (n=16)             | 75.48 | 95.69  | 71.19  | 77.42 | 79.14 | 20.03  | 68.29 |
| Max                       | 81.90 | 131.31 | 105.54 | 96.39 | 96.35 | 84.73  | 87.76 |
| Min                       | 71.57 | 68.66  | 18.56  | 64.57 | 48.60 | 3.26   | 9.90  |

|                           |       |        |        |       |        |        |        |
|---------------------------|-------|--------|--------|-------|--------|--------|--------|
| ERY 0.08+FUS 0.02+TMP 5   |       |        |        |       |        |        |        |
| Median (n=16)             | 75.48 | 95.69  | 55.82  | 77.42 | 21.30  | 50.63  | 9.85   |
| Max                       | 81.90 | 131.31 | 60.53  | 96.39 | 41.77  | 68.78  | 31.07  |
| Min                       | 71.57 | 68.66  | 51.17  | 64.57 | 10.06  | 38.72  | 5.72   |
| ERY 0.08+FUS 0.02+TOB 0.2 |       |        |        |       |        |        |        |
| Median (n=32)             | 75.48 | 95.69  | 97.75  | 77.42 | 94.59  | 88.95  | 80.54  |
| Max                       | 81.90 | 131.31 | 136.91 | 96.39 | 111.44 | 103.73 | 118.03 |
| Min                       | 71.57 | 68.66  | 69.31  | 64.57 | 68.61  | 70.58  | 32.25  |
| ERY 0.08+FUS 0.02+VAN 0.5 |       |        |        |       |        |        |        |
| Median (n=32)             | 75.48 | 95.69  | 94.89  | 77.42 | 103.91 | 109.37 | 79.73  |
| Max                       | 81.90 | 131.31 | 132.58 | 96.39 | 124.03 | 124.39 | 96.17  |
| Min                       | 71.57 | 68.66  | 62.31  | 64.57 | 92.44  | 92.71  | 31.72  |
| CHL 120+CLI 0.04+GEN 0.25 |       |        |        |       |        |        |        |
| Median (n=16)             | 84.63 | 99.43  | 85.44  | 63.16 | 47.99  | -1.32  | 15.84  |
| Max                       | 91.82 | 128.75 | 104.78 | 73.49 | 58.56  | 9.55   | 74.18  |
| Min                       | 79.26 | 85.73  | 66.01  | 49.41 | 33.53  | -8.46  | -1.91  |
| CHL 120+CPR 0.2+GEN 0.25  |       |        |        |       |        |        |        |
| Median (n=16)             | 84.63 | 78.04  | 85.44  | 46.87 | 47.99  | 45.17  | 12.23  |
| Max                       | 91.82 | 89.38  | 104.78 | 54.46 | 58.56  | 54.75  | 25.53  |

|                           |       |        |        |       |       |       |        |
|---------------------------|-------|--------|--------|-------|-------|-------|--------|
| Min                       | 79.26 | 61.17  | 66.01  | 40.09 | 33.53 | 32.60 | 5.04   |
| CHL 120+DOX 1+GEN 0.25    |       |        |        |       |       |       |        |
| Median (n=16)             | 84.63 | 95.36  | 85.44  | 14.23 | 47.99 | 50.80 | -6.04  |
| Max                       | 91.82 | 109.79 | 104.78 | 22.72 | 58.56 | 73.19 | -0.45  |
| Min                       | 79.26 | 83.39  | 66.01  | 8.10  | 33.53 | 29.08 | -10.66 |
| CHL 120+ERY 0.08+GEN 0.25 |       |        |        |       |       |       |        |
| Median (n=16)             | 84.63 | 75.48  | 85.44  | 63.86 | 47.99 | 46.29 | 8.30   |
| Max                       | 91.82 | 81.90  | 104.78 | 86.13 | 58.56 | 72.96 | 27.19  |
| Min                       | 79.26 | 71.57  | 66.01  | 39.91 | 33.53 | 11.61 | -1.48  |
| CHL 120+FUS 0.02+GEN 0.25 |       |        |        |       |       |       |        |
| Median (n=16)             | 84.63 | 95.69  | 85.44  | 56.79 | 47.99 | 81.45 | 1.95   |
| Max                       | 91.82 | 131.31 | 104.78 | 64.81 | 58.56 | 91.84 | 45.48  |
| Min                       | 79.26 | 68.66  | 66.01  | 30.44 | 33.53 | 66.37 | -5.20  |
| CHL 120+GEN 0.25+TMP 5    |       |        |        |       |       |       |        |
| Median (n=16)             | 84.63 | 85.44  | 55.82  | 47.99 | 50.04 | 51.37 | 26.54  |
| Max                       | 91.82 | 104.78 | 60.53  | 58.56 | 69.42 | 61.62 | 34.78  |
| Min                       | 79.26 | 66.01  | 51.17  | 33.53 | 41.30 | 38.92 | 12.30  |
| CHL 120+GEN 0.25+TOB 0.2  |       |        |        |       |       |       |        |
| Median (n=32)             | 84.63 | 85.44  | 97.75  | 47.99 | 68.21 | 57.79 | 1.77   |

|                            |       |        |        |       |        |       |       |
|----------------------------|-------|--------|--------|-------|--------|-------|-------|
| Max                        | 91.82 | 104.78 | 136.91 | 58.56 | 81.29  | 71.29 | 23.66 |
| Min                        | 79.26 | 66.01  | 69.31  | 33.53 | 48.32  | -6.01 | -5.48 |
| CHL 120+GEN 0.25+VAN 0.5   |       |        |        |       |        |       |       |
| Median (n=32)              | 84.63 | 85.44  | 94.89  | 47.99 | 64.60  | 60.44 | 4.11  |
| Max                        | 91.82 | 104.78 | 132.58 | 58.56 | 68.18  | 80.56 | 22.35 |
| Min                        | 79.26 | 66.01  | 62.31  | 33.53 | 56.68  | -3.66 | -5.18 |
| ERY 0.08+FUS 0.02+GEN 0.25 |       |        |        |       |        |       |       |
| Median (n=16)              | 75.48 | 95.69  | 85.44  | 77.41 | 46.29  | 81.45 | 1.47  |
| Max                        | 81.90 | 131.31 | 104.78 | 96.39 | 72.96  | 91.84 | 14.47 |
| Min                        | 71.57 | 68.66  | 66.01  | 64.57 | 11.61  | 66.37 | -2.58 |
| ERY 0.08+GEN 0.25+TMP 5    |       |        |        |       |        |       |       |
| Median (n=16)              | 75.48 | 85.44  | 55.82  | 46.29 | 21.30  | 51.37 | -0.99 |
| Max                        | 81.90 | 104.78 | 60.53  | 72.96 | 41.77  | 61.62 | 12.58 |
| Min                        | 71.57 | 66.01  | 51.17  | 11.61 | 10.06  | 38.92 | -8.50 |
| ERY 0.08+GEN 0.25+TOB 0.2  |       |        |        |       |        |       |       |
| Median (n=32)              | 75.48 | 85.44  | 97.75  | 46.29 | 94.59  | 57.79 | 2.83  |
| Max                        | 81.90 | 104.78 | 136.91 | 72.96 | 111.44 | 71.29 | 63.43 |
| Min                        | 71.57 | 66.01  | 69.31  | 11.61 | 68.61  | -6.01 | -3.47 |
| ERY 0.08+GEN 0.25+VAN 0.5  |       |        |        |       |        |       |       |

|                           |        |        |        |       |        |       |       |
|---------------------------|--------|--------|--------|-------|--------|-------|-------|
| Median (n=33)             | 75.48  | 85.44  | 94.89  | 46.29 | 103.91 | 60.44 | 27.11 |
| Max                       | 81.90  | 104.78 | 132.58 | 72.96 | 124.03 | 80.56 | 37.76 |
| Min                       | 71.57  | 66.01  | 62.31  | 11.61 | 92.44  | -3.66 | 19.74 |
| CLI 0.04+CPR 0.2+DOX 1    |        |        |        |       |        |       |       |
| Median (n=8)              | 99.43  | 78.04  | 95.36  | 49.17 | 18.98  | 47.05 | 12.82 |
| Max                       | 128.75 | 89.38  | 109.79 | 54.56 | 22.69  | 54.20 | 17.46 |
| Min                       | 85.73  | 61.17  | 83.39  | 36.92 | 12.25  | 44.87 | 3.68  |
| CLI 0.04+CPR 0.2+ERY 0.08 |        |        |        |       |        |       |       |
| Median (n=8)              | 99.43  | 78.04  | 75.48  | 49.17 | 100.16 | 62.04 | 44.89 |
| Max                       | 128.75 | 89.38  | 81.90  | 54.56 | 110.96 | 66.43 | 46.67 |
| Min                       | 85.73  | 61.17  | 71.57  | 36.92 | 68.66  | 52.16 | 36.13 |
| CLI 0.04+CPR 0.2+FOX 0.7  |        |        |        |       |        |       |       |
| Median (n=8)              | 99.43  | 78.04  | 75.22  | 49.17 | 67.51  | 53.73 | 40.26 |
| Max                       | 128.75 | 89.38  | 113.77 | 54.56 | 111.52 | 63.56 | 44.92 |
| Min                       | 85.73  | 61.17  | 69.35  | 36.92 | 60.84  | 46.84 | 33.37 |
| CLI 0.04+CPR 0.2+FUS 0.02 |        |        |        |       |        |       |       |
| Median (n=16)             | 99.43  | 78.04  | 95.69  | 49.17 | 94.56  | 74.68 | 46.13 |
| Max                       | 128.75 | 89.38  | 131.31 | 54.56 | 112.05 | 87.86 | 50.69 |
| Min                       | 85.73  | 61.17  | 68.66  | 36.92 | 64.41  | 61.49 | 39.43 |

|                            |        |        |        |        |        |       |        |
|----------------------------|--------|--------|--------|--------|--------|-------|--------|
| CLI 0.04+CPR 0.2+GEN 0.25  |        |        |        |        |        |       |        |
| Median (n=16)              | 99.43  | 78.04  | 85.44  | 49.17  | -1.32  | 45.17 | -7.98  |
| Max                        | 128.75 | 89.38  | 104.78 | 54.56  | 9.55   | 54.75 | 0.96   |
| Min                        | 85.73  | 61.17  | 66.01  | 36.92  | -8.46  | 32.60 | -13.67 |
| CLI 0.04+CPR 0.2+TMP 5     |        |        |        |        |        |       |        |
| Median (n=8)               | 99.43  | 78.04  | 55.82  | 49.17  | 46.99  | 39.13 | 29.67  |
| Max                        | 128.75 | 89.38  | 60.53  | 54.56  | 58.92  | 47.03 | 36.77  |
| Min                        | 85.73  | 61.17  | 51.17  | 36.92  | 33.51  | 31.59 | 19.97  |
| CLI 0.04+CPR 0.2+TOB 0.2   |        |        |        |        |        |       |        |
| Median (n=32)              | 99.43  | 78.04  | 97.75  | 49.17  | 90.92  | 52.41 | 31.79  |
| Max                        | 128.75 | 89.38  | 136.91 | 54.56  | 138.17 | 59.02 | 46.05  |
| Min                        | 85.73  | 61.17  | 69.31  | 36.92  | 64.61  | 45.63 | 14.38  |
| CLI 0.04+CPR 0.2+VAN 0.5   |        |        |        |        |        |       |        |
| Median (n=32)              | 99.43  | 78.04  | 94.89  | 49.17  | 105.83 | 58.63 | 41.49  |
| Max                        | 128.75 | 89.38  | 132.58 | 54.56  | 146.82 | 61.45 | 46.41  |
| Min                        | 85.73  | 61.17  | 62.31  | 36.92  | 68.49  | 51.51 | 34.74  |
| CLI 0.04+FUS 0.02+GEN 0.25 |        |        |        |        |        |       |        |
| Median (n=16)              | 99.43  | 95.69  | 85.44  | 94.56  | -1.32  | 81.45 | -5.91  |
| Max                        | 128.75 | 131.31 | 104.78 | 112.05 | 9.55   | 91.84 | 2.98   |

|                           |        |        |        |        |        |        |        |
|---------------------------|--------|--------|--------|--------|--------|--------|--------|
| Min                       | 85.73  | 68.66  | 66.01  | 64.41  | -8.46  | 66.37  | -10.68 |
| CLI 0.04+FUS 0.02+STR 2.8 |        |        |        |        |        |        |        |
| Median (n=16)             | 99.43  | 95.69  | 71.19  | 94.56  | 81.21  | 20.03  | 68.49  |
| Max                       | 128.75 | 131.31 | 105.54 | 112.05 | 87.93  | 84.73  | 77.61  |
| Min                       | 85.73  | 68.66  | 18.56  | 64.41  | 8.12   | 3.26   | -6.06  |
| CLI 0.04+FUS 0.02+TMP 5   |        |        |        |        |        |        |        |
| Median (n=16)             | 99.43  | 95.69  | 55.82  | 94.56  | 46.99  | 50.63  | 43.56  |
| Max                       | 128.75 | 131.31 | 60.53  | 112.05 | 58.92  | 68.78  | 49.11  |
| Min                       | 85.73  | 68.66  | 51.17  | 64.41  | 33.51  | 38.72  | 33.83  |
| CLI 0.04+FUS 0.02+TOB 0.2 |        |        |        |        |        |        |        |
| Median (n=32)             | 99.43  | 95.69  | 97.75  | 94.56  | 90.92  | 88.95  | 71.94  |
| Max                       | 128.75 | 131.31 | 136.91 | 112.05 | 138.17 | 103.73 | 79.96  |
| Min                       | 85.73  | 68.66  | 69.31  | 64.41  | 64.61  | 70.58  | 31.92  |
| CLI 0.04+FUS 0.02+VAN 0.5 |        |        |        |        |        |        |        |
| Median (n=32)             | 99.43  | 95.69  | 94.89  | 94.56  | 105.83 | 109.37 | 78.52  |
| Max                       | 128.75 | 131.31 | 132.58 | 112.05 | 146.82 | 124.39 | 93.60  |
| Min                       | 85.73  | 68.66  | 62.31  | 64.41  | 68.49  | 92.71  | 48.66  |
| CLI 0.04+DOX 1+FOX 0.7    |        |        |        |        |        |        |        |
| Median (n=16)             | 99.43  | 95.36  | 75.22  | 18.98  | 67.51  | 46.36  | 13.41  |



|                         |        |        |        |       |        |       |        |
|-------------------------|--------|--------|--------|-------|--------|-------|--------|
| Max                     | 128.75 | 109.79 | 113.77 | 22.69 | 111.52 | 52.62 | 58.35  |
| Min                     | 85.73  | 83.39  | 69.35  | 12.25 | 60.84  | 34.79 | -0.68  |
| CLI 0.04+DOX 1+FUS 0.02 |        |        |        |       |        |       |        |
| Median (n=16)           | 99.43  | 95.36  | 95.69  | 18.98 | 94.56  | 47.93 | 2.19   |
| Max                     | 128.75 | 109.79 | 131.31 | 22.69 | 112.05 | 68.27 | 13.79  |
| Min                     | 85.73  | 83.39  | 68.66  | 12.25 | 64.41  | 38.52 | -7.97  |
| CLI 0.04+DOX 1+GEN 0.25 |        |        |        |       |        |       |        |
| Median (n=16)           | 99.43  | 95.36  | 85.44  | 18.98 | -1.32  | 50.80 | -10.00 |
| Max                     | 128.75 | 109.79 | 104.78 | 22.69 | 9.55   | 73.19 | -4.79  |
| Min                     | 85.73  | 83.39  | 66.01  | 12.25 | -8.46  | 29.08 | -16.25 |
| CLI 0.04+DOX 1+TMP 5    |        |        |        |       |        |       |        |
| Median (n=8)            | 99.43  | 95.36  | 55.82  | 18.98 | 46.99  | 50.31 | -12.45 |
| Max                     | 128.75 | 109.79 | 60.53  | 22.69 | 58.92  | 73.34 | -0.55  |
| Min                     | 85.73  | 83.39  | 51.17  | 12.25 | 33.51  | 40.37 | -15.22 |
| CLI 0.04+DOX 1+TOB 0.2  |        |        |        |       |        |       |        |
| Median (n=32)           | 99.43  | 95.36  | 97.75  | 18.98 | 90.92  | 75.77 | -7.56  |
| Max                     | 128.75 | 109.79 | 136.91 | 22.69 | 138.17 | 86.50 | 2.09   |
| Min                     | 85.73  | 83.39  | 69.31  | 12.25 | 64.61  | 72.31 | -15.62 |
| CLI 0.04+DOX 1+VAN 0.5  |        |        |        |       |        |       |        |

|                            |        |        |        |        |        |       |        |
|----------------------------|--------|--------|--------|--------|--------|-------|--------|
| Median (n=32)              | 99.43  | 95.36  | 94.89  | 18.98  | 105.83 | 62.73 | -7.98  |
| Max                        | 128.75 | 109.79 | 132.58 | 22.69  | 146.82 | 86.12 | 7.01   |
| Min                        | 85.73  | 83.39  | 62.31  | 12.25  | 68.49  | 50.67 | -18.12 |
| CLI 0.04+GEN 0.25+TMP 5    |        |        |        |        |        |       |        |
| Median (n=16)              | 99.43  | 85.44  | 55.82  | -1.32  | 46.99  | 51.37 | 9.43   |
| Max                        | 128.75 | 104.78 | 60.53  | 9.55   | 58.92  | 61.62 | 14.35  |
| Min                        | 85.73  | 66.01  | 51.17  | -8.46  | 33.51  | 38.92 | 2.19   |
| CLI 0.04+GEN 0.25+TOB 0.2  |        |        |        |        |        |       |        |
| Median (n=32)              | 99.43  | 85.44  | 97.75  | -1.32  | 90.92  | 57.79 | -8.39  |
| Max                        | 128.75 | 104.78 | 136.91 | 9.55   | 138.17 | 71.29 | -4.71  |
| Min                        | 85.73  | 66.01  | 69.31  | -8.46  | 64.61  | -6.01 | -15.52 |
| CLI 0.04+GEN 0.25+VAN 0.5  |        |        |        |        |        |       |        |
| Median (n=32)              | 99.43  | 85.44  | 94.89  | -1.32  | 105.83 | 60.44 | -11.00 |
| Max                        | 128.75 | 104.78 | 132.58 | 9.55   | 146.82 | 80.56 | 0.16   |
| Min                        | 85.73  | 66.01  | 62.31  | -8.46  | 68.49  | -3.66 | -17.04 |
| CLI 0.04+ERY 0.08+FUS 0.02 |        |        |        |        |        |       |        |
| Median (n=16)              | 99.43  | 75.48  | 95.69  | 100.16 | 94.56  | 77.41 | 86.79  |
| Max                        | 128.75 | 81.90  | 131.31 | 110.96 | 112.05 | 96.39 | 99.55  |
| Min                        | 85.73  | 71.57  | 68.66  | 68.66  | 64.41  | 64.57 | 2.30   |

|                            |        |       |        |        |        |        |       |
|----------------------------|--------|-------|--------|--------|--------|--------|-------|
| CLI 0.04+ERY 0.08+GEN 0.25 |        |       |        |        |        |        |       |
| Median (n=16)              | 99.43  | 75.48 | 85.44  | 100.16 | -1.32  | 46.29  | 23.40 |
| Max                        | 128.75 | 81.90 | 104.78 | 110.96 | 9.55   | 72.96  | 41.45 |
| Min                        | 85.73  | 71.57 | 66.01  | 68.66  | -8.46  | 11.61  | 17.09 |
| CLI 0.04+ERY 0.08+STR 2.8  |        |       |        |        |        |        |       |
| Median (n=16)              | 99.43  | 75.48 | 71.19  | 100.16 | 81.21  | 79.14  | 18.24 |
| Max                        | 128.75 | 81.90 | 105.54 | 110.96 | 87.93  | 96.35  | 77.65 |
| Min                        | 85.73  | 71.57 | 18.56  | 68.66  | 8.12   | 48.60  | 11.40 |
| CLI 0.04+ERY 0.08+TMP 5    |        |       |        |        |        |        |       |
| Median (n=8)               | 99.43  | 75.48 | 55.82  | 100.16 | 46.99  | 21.30  | 19.55 |
| Max                        | 128.75 | 81.90 | 60.53  | 110.96 | 58.92  | 41.77  | 54.39 |
| Min                        | 85.73  | 71.57 | 51.17  | 68.66  | 33.51  | 10.06  | 7.52  |
| CLI 0.04+ERY 0.08+TOB 0.2  |        |       |        |        |        |        |       |
| Median (n=32)              | 99.43  | 75.48 | 97.75  | 100.16 | 90.92  | 94.59  | 85.06 |
| Max                        | 128.75 | 81.90 | 136.91 | 110.96 | 138.17 | 111.44 | 98.37 |
| Min                        | 85.73  | 71.57 | 69.31  | 68.66  | 64.61  | 68.61  | 41.79 |
| CLI 0.04+ERY 0.08+VAN 0.5  |        |       |        |        |        |        |       |
| Median (n=32)              | 99.43  | 75.48 | 94.89  | 100.16 | 105.83 | 103.91 | 80.26 |
| Max                        | 128.75 | 81.90 | 132.58 | 110.96 | 146.82 | 124.03 | 88.87 |

|                           |        |        |        |        |        |       |        |
|---------------------------|--------|--------|--------|--------|--------|-------|--------|
| Min                       | 85.73  | 71.57  | 62.31  | 68.66  | 68.49  | 92.44 | 77.41  |
| CLI 0.04+ERY 0.08+FOX 0.7 |        |        |        |        |        |       |        |
| Median (n=16)             | 99.43  | 75.48  | 75.22  | 100.16 | 67.51  | 82.63 | 86.97  |
| Max                       | 128.75 | 81.90  | 113.77 | 110.96 | 111.52 | 93.07 | 124.67 |
| Min                       | 85.73  | 71.57  | 69.35  | 68.66  | 60.84  | 53.44 | 47.26  |
| CLI 0.04+FOX 0.7+FUS 0.02 |        |        |        |        |        |       |        |
| Median (n=16)             | 99.43  | 75.22  | 95.69  | 67.51  | 94.56  | 86.05 | 76.94  |
| Max                       | 128.75 | 113.77 | 131.31 | 111.52 | 112.05 | 95.12 | 113.19 |
| Min                       | 85.73  | 69.35  | 68.66  | 60.84  | 64.41  | 75.21 | 54.48  |
| CLI 0.04+FOX 0.7+GEN 0.25 |        |        |        |        |        |       |        |
| Median (n=16)             | 99.43  | 75.22  | 85.44  | 67.51  | -1.32  | 60.15 | 23.89  |
| Max                       | 128.75 | 113.77 | 104.78 | 111.52 | 9.55   | 66.12 | 39.10  |
| Min                       | 85.73  | 69.35  | 66.01  | 60.84  | -8.46  | 53.36 | 6.52   |
| CLI 0.04+FOX 0.7+STR 2.8  |        |        |        |        |        |       |        |
| Median (n=16)             | 99.43  | 75.22  | 71.19  | 67.51  | 81.21  | 65.35 | 65.00  |
| Max                       | 128.75 | 113.77 | 105.54 | 111.52 | 87.93  | 88.02 | 91.56  |
| Min                       | 85.73  | 69.35  | 18.56  | 60.84  | 8.12   | 53.01 | -8.06  |
| CLI 0.04+FOX 0.7+TMP 5    |        |        |        |        |        |       |        |
| Median (n=8)              | 99.43  | 75.22  | 55.82  | 67.51  | 46.99  | 40.97 | 47.18  |

|                          |        |        |        |        |        |        |        |
|--------------------------|--------|--------|--------|--------|--------|--------|--------|
| Max                      | 128.75 | 113.77 | 60.53  | 111.52 | 58.92  | 51.39  | 56.27  |
| Min                      | 85.73  | 69.35  | 51.17  | 60.84  | 33.51  | 33.23  | 44.81  |
| CLI 0.04+FOX 0.7+TOB 0.2 |        |        |        |        |        |        |        |
| Median (n=32)            | 99.43  | 75.22  | 97.75  | 67.51  | 90.92  | 103.02 | 79.95  |
| Max                      | 128.75 | 113.77 | 136.91 | 111.52 | 138.17 | 124.11 | 105.01 |
| Min                      | 85.73  | 69.35  | 69.31  | 60.84  | 64.61  | 78.38  | 39.03  |
| CLI 0.04+FOX 0.7+VAN 0.5 |        |        |        |        |        |        |        |
| Median (n=32)            | 99.43  | 75.22  | 94.89  | 67.51  | 105.83 | 80.06  | 64.68  |
| Max                      | 128.75 | 113.77 | 132.58 | 111.52 | 146.82 | 86.92  | 103.70 |
| Min                      | 85.73  | 69.35  | 62.31  | 60.84  | 68.49  | -4.66  | -13.72 |
| CLI 0.04+STR 2.8+TMP 5   |        |        |        |        |        |        |        |
| Median (n=16)            | 99.43  | 71.19  | 55.82  | 46.99  | 46.99  | 45.28  | 9.43   |
| Max                      | 128.75 | 105.54 | 60.53  | 58.92  | 58.92  | 55.20  | 30.99  |
| Min                      | 85.73  | 18.56  | 51.17  | 33.51  | 33.51  | 37.23  | -3.92  |
| CLI 0.04+STR 2.8+VAN 0.5 |        |        |        |        |        |        |        |
| Median (n=32)            | 99.43  | 71.19  | 94.89  | 81.21  | 105.83 | 62.44  | 70.67  |
| Max                      | 128.75 | 105.54 | 132.58 | 87.93  | 146.82 | 72.65  | 88.61  |
| Min                      | 85.73  | 18.56  | 62.31  | 8.12   | 68.49  | -11.87 | -7.73  |
| CPR 0.2+DOX 1+FOX 0.7    |        |        |        |        |        |        |        |

|                        |       |        |        |       |       |       |        |
|------------------------|-------|--------|--------|-------|-------|-------|--------|
| Median (n=8)           | 78.04 | 95.36  | 75.22  | 47.05 | 53.73 | 46.36 | 28.83  |
| Max                    | 89.38 | 109.79 | 113.77 | 54.20 | 63.56 | 52.62 | 35.71  |
| Min                    | 61.17 | 83.39  | 69.35  | 44.87 | 46.84 | 34.79 | 19.04  |
| CPR 0.2+DOX 1+FUS 0.02 |       |        |        |       |       |       |        |
| Median (n=16)          | 78.04 | 95.36  | 95.69  | 47.05 | 74.68 | 47.93 | 34.77  |
| Max                    | 89.38 | 109.79 | 131.31 | 54.20 | 87.86 | 68.27 | 45.90  |
| Min                    | 61.17 | 83.39  | 68.66  | 44.87 | 61.49 | 38.52 | 29.02  |
| CPR 0.2+DOX 1+GEN 0.25 |       |        |        |       |       |       |        |
| Median (n=16)          | 78.04 | 95.36  | 85.44  | 47.05 | 45.17 | 50.80 | 15.24  |
| Max                    | 89.38 | 109.79 | 104.78 | 54.20 | 54.75 | 73.19 | 18.60  |
| Min                    | 61.17 | 83.39  | 66.01  | 44.87 | 32.60 | 29.08 | 4.57   |
| CPR 0.2+DOX 1+TMP 5    |       |        |        |       |       |       |        |
| Median (n=8)           | 78.04 | 95.36  | 55.82  | 47.05 | 39.13 | 50.31 | -6.73  |
| Max                    | 89.38 | 109.79 | 60.53  | 54.20 | 47.03 | 73.34 | -0.45  |
| Min                    | 61.17 | 83.39  | 51.17  | 44.87 | 31.59 | 40.37 | -14.21 |
| CPR 0.2+DOX 1+TOB 0.2  |       |        |        |       |       |       |        |
| Median (n=32)          | 78.04 | 95.36  | 97.75  | 47.05 | 52.41 | 75.77 | 29.99  |
| Max                    | 89.38 | 109.79 | 136.91 | 54.20 | 59.02 | 86.50 | 37.02  |
| Min                    | 61.17 | 83.39  | 69.31  | 44.87 | 45.63 | 72.31 | 27.29  |

|                                  |        |        |        |       |        |       |       |
|----------------------------------|--------|--------|--------|-------|--------|-------|-------|
| <b>CPR 0.2+DOX 1+VAN 0.5</b>     |        |        |        |       |        |       |       |
| Median (n=32)                    | 78.04  | 95.36  | 94.89  | 47.05 | 58.63  | 62.73 | 18.45 |
| Max                              | 89.38  | 109.79 | 132.58 | 54.20 | 61.45  | 86.12 | 25.62 |
| Min                              | 61.17  | 83.39  | 62.31  | 44.87 | 51.51  | 50.67 | 4.74  |
| <b>FUS 0.02+GEN 0.25+TMP 5</b>   |        |        |        |       |        |       |       |
| Median (n=16)                    | 95.69  | 85.44  | 55.82  | 81.45 | 50.63  | 51.37 | 59.36 |
| Max                              | 131.31 | 104.78 | 60.53  | 91.84 | 68.78  | 61.62 | 70.05 |
| Min                              | 68.66  | 66.01  | 51.17  | 66.37 | 38.72  | 38.92 | 55.31 |
| <b>FUS 0.02+GEN 0.25+TOB 0.2</b> |        |        |        |       |        |       |       |
| Median (n=32)                    | 95.69  | 85.44  | 97.75  | 81.45 | 88.95  | 57.79 | 19.93 |
| Max                              | 131.31 | 104.78 | 136.91 | 91.84 | 103.73 | 71.29 | 50.36 |
| Min                              | 68.66  | 66.01  | 69.31  | 66.37 | 70.58  | -6.01 | 4.50  |
| <b>FUS 0.02+GEN 0.25+VAN 0.5</b> |        |        |        |       |        |       |       |
| Median (n=32)                    | 95.69  | 85.44  | 94.89  | 81.45 | 109.37 | 60.44 | 48.59 |
| Max                              | 131.31 | 104.78 | 132.58 | 91.84 | 124.39 | 80.56 | 76.87 |
| Min                              | 68.66  | 66.01  | 62.31  | 66.37 | 92.71  | -3.66 | 40.36 |
| <b>CPR 0.2+ERY 0.08+FUS 0.02</b> |        |        |        |       |        |       |       |
| Median (n=16)                    | 78.04  | 75.48  | 95.69  | 62.04 | 74.68  | 77.41 | 55.63 |
| Max                              | 89.38  | 81.90  | 131.31 | 66.43 | 87.86  | 96.39 | 69.49 |

|                           |       |       |        |       |       |        |       |
|---------------------------|-------|-------|--------|-------|-------|--------|-------|
| Min                       | 61.17 | 71.57 | 68.66  | 52.16 | 61.49 | 64.57  | 36.91 |
| CPR 0.2+ERY 0.08+GEN 0.25 |       |       |        |       |       |        |       |
| Median (n=16)             | 78.04 | 75.48 | 85.44  | 62.04 | 45.17 | 46.29  | 38.55 |
| Max                       | 89.38 | 81.90 | 104.78 | 66.43 | 54.75 | 72.96  | 62.22 |
| Min                       | 61.17 | 71.57 | 66.01  | 52.16 | 32.60 | 11.61  | 15.64 |
| CPR 0.2+ERY 0.08+TMP 5    |       |       |        |       |       |        |       |
| Median (n=8)              | 78.04 | 75.48 | 55.82  | 62.04 | 39.13 | 21.30  | 16.37 |
| Max                       | 89.38 | 81.90 | 60.53  | 66.43 | 47.03 | 41.77  | 44.11 |
| Min                       | 61.17 | 71.57 | 51.17  | 52.16 | 31.59 | 10.06  | 4.39  |
| CPR 0.2+ERY 0.08+TOB 0.2  |       |       |        |       |       |        |       |
| Median (n=32)             | 78.04 | 75.48 | 97.75  | 62.04 | 52.41 | 94.59  | 58.68 |
| Max                       | 89.38 | 81.90 | 136.91 | 66.43 | 59.02 | 111.44 | 69.59 |
| Min                       | 61.17 | 71.57 | 69.31  | 52.16 | 45.63 | 68.61  | 49.54 |
| CPR 0.2+ERY 0.08+VAN 0.5  |       |       |        |       |       |        |       |
| Median (n=32)             | 78.04 | 75.48 | 94.89  | 62.04 | 58.63 | 103.91 | 50.30 |
| Max                       | 89.38 | 81.90 | 132.58 | 66.43 | 61.45 | 124.03 | 61.05 |
| Min                       | 61.17 | 71.57 | 62.31  | 52.16 | 51.51 | 92.44  | -5.29 |
| CPR 0.2+ERY 0.08+FOX 0.7  |       |       |        |       |       |        |       |
| Median (n=16)             | 78.04 | 75.48 | 75.22  | 62.04 | 53.73 | 82.63  | 45.32 |



|                          |       |        |        |       |       |        |        |
|--------------------------|-------|--------|--------|-------|-------|--------|--------|
| Max                      | 89.38 | 81.90  | 113.77 | 66.43 | 63.56 | 93.07  | 51.20  |
| Min                      | 61.17 | 71.57  | 69.35  | 52.16 | 46.84 | 53.44  | 36.11  |
| CPR 0.2+FOX 0.7+GEN 0.25 |       |        |        |       |       |        |        |
| Median (n=16)            | 78.04 | 75.22  | 85.44  | 53.73 | 45.17 | 60.15  | 49.78  |
| Max                      | 89.38 | 113.77 | 104.78 | 63.56 | 54.75 | 66.12  | 63.77  |
| Min                      | 61.17 | 69.35  | 66.01  | 46.84 | 32.60 | 53.36  | 40.26  |
| CPR 0.2+FOX 0.7+TMP 5    |       |        |        |       |       |        |        |
| Median (n=8)             | 78.04 | 75.22  | 55.82  | 53.73 | 39.13 | 40.97  | 8.45   |
| Max                      | 89.38 | 113.77 | 60.53  | 63.56 | 47.03 | 51.39  | 17.04  |
| Min                      | 61.17 | 69.35  | 51.17  | 46.84 | 31.59 | 33.23  | 3.88   |
| CPR 0.2+FOX 0.7+TOB 0.2  |       |        |        |       |       |        |        |
| Median (n=32)            | 78.04 | 75.22  | 97.75  | 53.73 | 52.41 | 103.02 | 51.88  |
| Max                      | 89.38 | 113.77 | 136.91 | 63.56 | 59.02 | 124.11 | 58.16  |
| Min                      | 61.17 | 69.35  | 69.31  | 46.84 | 45.63 | 78.38  | 46.85  |
| CPR 0.2+FOX 0.7+VAN 0.5  |       |        |        |       |       |        |        |
| Median (n=32)            | 78.04 | 75.22  | 94.89  | 53.73 | 58.63 | 80.06  | -14.52 |
| Max                      | 89.38 | 113.77 | 132.58 | 63.56 | 61.45 | 86.92  | -5.04  |
| Min                      | 61.17 | 69.35  | 62.31  | 46.84 | 51.51 | -4.66  | -20.29 |
| DOX 1+TMP 5+VAN 0.5      |       |        |        |       |       |        |        |

|                           |        |        |        |       |        |        |        |
|---------------------------|--------|--------|--------|-------|--------|--------|--------|
| Median (n=32)             | 95.36  | 55.82  | 94.89  | 50.31 | 62.73  | 53.53  | 42.09  |
| Max                       | 109.79 | 60.53  | 132.58 | 73.34 | 86.12  | 59.72  | 50.79  |
| Min                       | 83.39  | 51.17  | 62.31  | 40.37 | 50.67  | 42.30  | 29.39  |
| FUS 0.02+STR 2.8+TOB 0.2  |        |        |        |       |        |        |        |
| Median (n=32)             | 95.69  | 71.19  | 97.75  | 20.03 | 88.95  | 70.06  | -2.20  |
| Max                       | 131.31 | 105.54 | 136.91 | 84.73 | 103.73 | 80.47  | 87.00  |
| Min                       | 68.66  | 18.56  | 69.31  | 3.26  | 70.58  | 67.84  | -10.72 |
| FUS 0.02+STR 2.8+VAN 0.5  |        |        |        |       |        |        |        |
| Median (n=32)             | 95.69  | 71.19  | 94.89  | 20.03 | 109.37 | 62.44  | 63.93  |
| Max                       | 131.31 | 105.54 | 132.58 | 84.73 | 124.39 | 72.65  | 89.56  |
| Min                       | 68.66  | 18.56  | 62.31  | 3.26  | 92.71  | -11.87 | -10.28 |
| CPR 0.2+FOX 0.7+FUS 0.02  |        |        |        |       |        |        |        |
| Median (n=16)             | 78.04  | 75.22  | 95.69  | 53.73 | 74.68  | 86.05  | 58.27  |
| Max                       | 89.38  | 113.77 | 131.31 | 63.56 | 87.86  | 95.12  | 62.06  |
| Min                       | 61.17  | 69.35  | 68.66  | 46.84 | 61.49  | 75.21  | 48.47  |
| CPR 0.2+FUS 0.02+GEN 0.25 |        |        |        |       |        |        |        |
| Median (n=16)             | 78.04  | 95.69  | 85.44  | 74.68 | 45.17  | 81.45  | 61.09  |
| Max                       | 89.38  | 131.31 | 104.78 | 87.86 | 54.75  | 91.84  | 72.49  |
| Min                       | 61.17  | 68.66  | 66.01  | 61.49 | 32.60  | 66.37  | 57.79  |

|                                 |        |        |        |       |       |        |       |
|---------------------------------|--------|--------|--------|-------|-------|--------|-------|
| <b>CPR 0.2+FUS 0.02+TMP 5</b>   |        |        |        |       |       |        |       |
| Median (n=16)                   | 78.04  | 95.69  | 55.82  | 74.68 | 39.13 | 50.63  | 50.13 |
| Max                             | 89.38  | 131.31 | 60.53  | 87.86 | 47.03 | 68.78  | 54.14 |
| Min                             | 61.17  | 68.66  | 51.17  | 61.49 | 31.59 | 38.72  | 36.04 |
| <b>CPR 0.2+FUS 0.02+TOB 0.2</b> |        |        |        |       |       |        |       |
| Median (n=32)                   | 78.04  | 95.69  | 97.75  | 74.68 | 52.41 | 88.95  | 73.39 |
| Max                             | 89.38  | 131.31 | 136.91 | 87.86 | 59.02 | 103.73 | 81.59 |
| Min                             | 61.17  | 68.66  | 69.31  | 61.49 | 45.63 | 70.58  | 67.48 |
| <b>CPR 0.2+FUS 0.02+VAN 0.5</b> |        |        |        |       |       |        |       |
| Median (n=32)                   | 78.04  | 95.69  | 94.89  | 74.68 | 58.63 | 109.37 | 56.68 |
| Max                             | 89.38  | 131.31 | 132.58 | 87.86 | 61.45 | 124.39 | 67.15 |
| Min                             | 61.17  | 68.66  | 62.31  | 61.49 | 51.51 | 92.71  | 50.66 |
| <b>DOX 1+TMP 5+TOB 0.2</b>      |        |        |        |       |       |        |       |
| Median (n=32)                   | 95.36  | 55.82  | 97.75  | 48.50 | 75.77 | 59.58  | 44.91 |
| Max                             | 109.79 | 60.53  | 136.91 | 57.58 | 86.50 | 68.60  | 57.55 |
| Min                             | 83.39  | 51.17  | 69.31  | 31.99 | 72.31 | 57.47  | 26.87 |
| <b>DOX 1+TOB 0.2+VAN 0.5</b>    |        |        |        |       |       |        |       |
| Median (n=32)                   | 95.36  | 97.75  | 94.89  | 75.77 | 62.73 | 102.49 | 38.29 |
| Max                             | 109.79 | 136.91 | 132.58 | 86.50 | 86.12 | 113.36 | 50.53 |

|                           |        |        |        |       |        |       |       |
|---------------------------|--------|--------|--------|-------|--------|-------|-------|
| Min                       | 83.39  | 69.31  | 62.31  | 72.31 | 50.67  | 93.41 | 17.07 |
| FUS 0.02+STR 2.8+TMP 5    |        |        |        |       |        |       |       |
| Median (n=16)             | 95.69  | 71.19  | 55.82  | 20.03 | 69.21  | 45.28 | 53.90 |
| Max                       | 131.31 | 105.54 | 60.53  | 84.73 | 78.25  | 55.20 | 78.83 |
| Min                       | 68.66  | 18.56  | 51.17  | 3.26  | 67.05  | 37.23 | 41.20 |
| FUS 0.02+TMP 5+TOB 0.2    |        |        |        |       |        |       |       |
| Median (n=32)             | 95.69  | 55.82  | 97.75  | 69.21 | 88.95  | 59.58 | 67.50 |
| Max                       | 131.31 | 60.53  | 136.91 | 78.25 | 103.73 | 68.60 | 73.49 |
| Min                       | 68.66  | 51.17  | 69.31  | 67.05 | 70.58  | 57.47 | 61.33 |
| FOX 0.7+FUS 0.02+GEN 0.25 |        |        |        |       |        |       |       |
| Median (n=16)             | 95.69  | 95.69  | 85.44  | 86.05 | 60.15  | 81.45 | 58.23 |
| Max                       | 131.31 | 131.31 | 104.78 | 95.12 | 66.12  | 91.84 | 71.19 |
| Min                       | 68.66  | 68.66  | 66.01  | 75.21 | 53.36  | 66.37 | 51.36 |
| FOX 0.7+FUS 0.02+STR 2.8  |        |        |        |       |        |       |       |
| Median (n=16)             | 75.22  | 95.69  | 71.19  | 86.05 | 65.35  | 20.03 | 71.03 |
| Max                       | 113.77 | 131.31 | 105.54 | 95.12 | 88.02  | 84.73 | 95.74 |
| Min                       | 69.35  | 68.66  | 18.56  | 75.21 | 53.01  | 3.26  | 13.87 |
| FOX 0.7+FUS 0.02+TMP 5    |        |        |        |       |        |       |       |
| Median (n=16)             | 75.22  | 95.69  | 55.82  | 86.05 | 40.97  | 50.63 | 40.92 |

|                          |        |        |        |       |        |        |        |
|--------------------------|--------|--------|--------|-------|--------|--------|--------|
| Max                      | 113.77 | 131.31 | 60.53  | 95.12 | 51.39  | 68.78  | 43.95  |
| Min                      | 69.35  | 68.66  | 51.17  | 75.21 | 33.23  | 38.72  | 31.03  |
| FOX 0.7+FUS 0.02+TOB 0.2 |        |        |        |       |        |        |        |
| Median (n=32)            | 75.22  | 95.69  | 97.75  | 86.05 | 103.02 | 88.95  | 85.41  |
| Max                      | 113.77 | 131.31 | 136.91 | 95.12 | 124.11 | 103.73 | 97.35  |
| Min                      | 69.35  | 68.66  | 69.31  | 75.21 | 78.38  | 70.58  | 68.50  |
| FOX 0.7+FUS 0.02+VAN 0.5 |        |        |        |       |        |        |        |
| Median (n=32)            | 75.22  | 95.69  | 94.89  | 86.05 | 80.06  | 109.37 | 72.46  |
| Max                      | 113.77 | 131.31 | 132.58 | 95.12 | 86.92  | 124.39 | 110.53 |
| Min                      | 69.35  | 68.66  | 62.31  | 75.21 | -4.66  | 92.71  | 59.62  |
| FOX 0.7+STR 2.8+TMP 5    |        |        |        |       |        |        |        |
| Median (n=16)            | 75.22  | 71.19  | 55.82  | 84.67 | 40.97  | 45.28  | 39.82  |
| Max                      | 113.77 | 105.54 | 60.53  | 95.24 | 51.39  | 55.20  | 51.85  |
| Min                      | 69.35  | 18.56  | 51.17  | 72.00 | 33.23  | 37.23  | 25.93  |
| FOX 0.7+STR 2.8+TOB 0.2  |        |        |        |       |        |        |        |
| Median (n=32)            | 75.22  | 71.19  | 97.75  | 84.67 | 103.02 | 60.88  | 70.37  |
| Max                      | 113.77 | 105.54 | 136.91 | 95.24 | 124.11 | 84.18  | 91.03  |
| Min                      | 69.35  | 18.56  | 69.31  | 72.00 | 78.38  | 3.91   | -11.14 |
| GEN 0.25+TOB 0.2+VAN 0.5 |        |        |        |       |        |        |        |

|                         |        |        |        |       |        |        |       |
|-------------------------|--------|--------|--------|-------|--------|--------|-------|
| Median (n=32)           | 85.44  | 97.75  | 94.89  | 60.44 | 68.35  | 102.49 | 8.94  |
| Max                     | 104.78 | 136.91 | 132.58 | 80.56 | 79.66  | 113.36 | 70.58 |
| Min                     | 66.01  | 69.31  | 62.31  | -3.66 | 51.67  | 93.41  | -1.99 |
| STR 2.8+TOB 0.2+VAN 0.5 |        |        |        |       |        |        |       |
| Median (n=32)           | 71.19  | 97.75  | 94.89  | 67.94 | 62.44  | 102.49 | 69.68 |
| Max                     | 105.54 | 136.91 | 132.58 | 84.18 | 72.65  | 113.36 | 92.32 |
| Min                     | 18.56  | 69.31  | 62.31  | 3.91  | -11.87 | 93.41  | -2.00 |
| TMP 5+TOB 0.2+VAN 0.5   |        |        |        |       |        |        |       |
| Median (n=32)           | 55.82  | 97.75  | 94.89  | 59.58 | 53.53  | 102.49 | 54.08 |
| Max                     | 60.53  | 136.91 | 132.58 | 68.60 | 59.72  | 113.36 | 68.84 |
| Min                     | 51.17  | 69.31  | 62.31  | 57.47 | 42.30  | 93.41  | 49.89 |
| GEN 0.25+TMP 5+TOB 0.2  |        |        |        |       |        |        |       |
| Median (n=32)           | 85.44  | 55.82  | 97.75  | 54.24 | 57.79  | 59.59  | 54.36 |
| Max                     | 104.78 | 60.53  | 136.91 | 60.21 | 71.29  | 68.60  | 62.37 |
| Min                     | 66.01  | 51.17  | 69.31  | 50.80 | -6.01  | 57.47  | 44.99 |
| GEN 0.25+TMP 5+VAN 0.5  |        |        |        |       |        |        |       |
| Median (n=32)           | 85.44  | 55.82  | 94.89  | 54.24 | 60.44  | 53.53  | 53.10 |
| Max                     | 104.78 | 60.53  | 132.58 | 60.21 | 80.56  | 59.72  | 57.17 |
| Min                     | 66.01  | 51.17  | 62.31  | 50.80 | -3.66  | 42.30  | 47.74 |

|                          |        |        |        |       |        |       |       |
|--------------------------|--------|--------|--------|-------|--------|-------|-------|
| STR 2.8+TMP 5+TOB 0.2    |        |        |        |       |        |       |       |
| Median (n=32)            | 71.19  | 55.82  | 97.75  | 45.28 | 70.06  | 59.59 | 15.69 |
| Max                      | 105.54 | 60.53  | 136.91 | 55.20 | 80.47  | 68.60 | 31.11 |
| Min                      | 18.56  | 51.17  | 69.31  | 37.23 | 67.84  | 57.47 | 3.91  |
| STR 2.8+TMP 5+VAN 0.5    |        |        |        |       |        |       |       |
| Median (n=32)            | 71.19  | 55.82  | 94.89  | 45.29 | 53.53  | 53.53 | 22.75 |
| Max                      | 105.54 | 60.53  | 132.58 | 55.20 | 59.72  | 59.72 | 47.81 |
| Min                      | 18.56  | 51.17  | 62.31  | 37.23 | 42.30  | 42.30 | 6.56  |
| FOX 0.7+GEN 0.25+TMP 5   |        |        |        |       |        |       |       |
| Median (n=16)            | 75.22  | 85.44  | 55.82  | 60.15 | 40.97  | 51.37 | 42.27 |
| Max                      | 113.77 | 104.78 | 60.53  | 66.12 | 51.39  | 61.62 | 48.10 |
| Min                      | 69.35  | 66.01  | 51.17  | 53.36 | 33.23  | 38.92 | 20.37 |
| FOX 0.7+GEN 0.25+TOB 0.2 |        |        |        |       |        |       |       |
| Median (n=32)            | 75.22  | 85.44  | 97.75  | 60.15 | 103.02 | 57.79 | 52.79 |
| Max                      | 113.77 | 104.78 | 136.91 | 66.12 | 124.11 | 71.29 | 56.34 |
| Min                      | 69.35  | 66.01  | 69.31  | 53.36 | 78.38  | -6.01 | 43.20 |
| FOX 0.7+GEN 0.25+VAN 0.5 |        |        |        |       |        |       |       |
| Median (n=32)            | 75.22  | 85.44  | 94.89  | 60.15 | 80.06  | 60.44 | -9.90 |
| Max                      | 113.77 | 104.78 | 132.58 | 66.12 | 86.92  | 80.56 | -6.16 |

|                        |        |       |        |       |        |       |        |
|------------------------|--------|-------|--------|-------|--------|-------|--------|
| Min                    | 69.35  | 66.01 | 62.31  | 53.36 | -4.66  | -3.66 | -20.18 |
| CHL 120+TMP 5+VAN 0.5  |        |       |        |       |        |       |        |
| Median (n=32)          | 84.63  | 55.82 | 94.89  | 50.04 | 64.60  | 53.53 | 31.00  |
| Max                    | 91.82  | 60.53 | 132.58 | 69.42 | 68.18  | 59.72 | 44.39  |
| Min                    | 79.26  | 51.17 | 62.31  | 41.30 | 56.68  | 42.30 | 13.09  |
| CLI 0.04+TMP 5+TOB 0.2 |        |       |        |       |        |       |        |
| Median (n=32)          | 99.43  | 55.82 | 97.75  | 46.99 | 90.92  | 59.59 | 34.74  |
| Max                    | 128.75 | 60.53 | 136.91 | 58.92 | 138.17 | 68.60 | 52.57  |
| Min                    | 85.73  | 51.17 | 69.31  | 33.51 | 64.61  | 57.47 | 25.95  |
| CLI 0.04+TMP 5+VAN 0.5 |        |       |        |       |        |       |        |
| Median (n=32)          | 99.43  | 55.82 | 94.89  | 46.99 | 105.83 | 53.53 | 40.23  |
| Max                    | 128.75 | 60.53 | 132.58 | 58.92 | 146.82 | 59.72 | 45.34  |
| Min                    | 85.73  | 51.17 | 62.31  | 33.51 | 68.49  | 42.30 | 29.37  |
| CPR 0.2+TMP 5+VAN 0.5  |        |       |        |       |        |       |        |
| Median (n=32)          | 78.04  | 55.82 | 94.89  | 37.24 | 58.63  | 53.53 | 19.04  |
| Max                    | 89.38  | 60.53 | 132.58 | 48.85 | 61.45  | 59.72 | 39.42  |
| Min                    | 61.17  | 51.17 | 62.31  | 22.81 | 51.51  | 42.30 | -5.58  |
| ERY 0.08+TMP 5+VAN 0.5 |        |       |        |       |        |       |        |
| Median (n=32)          | 75.48  | 55.82 | 94.89  | 21.30 | 103.91 | 53.53 | 12.22  |



|                         |        |        |        |       |        |       |       |
|-------------------------|--------|--------|--------|-------|--------|-------|-------|
| Max                     | 81.90  | 60.53  | 132.58 | 41.77 | 124.03 | 59.72 | 47.99 |
| Min                     | 71.57  | 51.17  | 62.31  | 10.06 | 92.44  | 42.30 | -0.52 |
| FOX 0.7+TMP 5+TOB 0.2   |        |        |        |       |        |       |       |
| Median (n=32)           | 75.22  | 55.82  | 97.75  | 40.97 | 103.02 | 59.59 | 43.70 |
| Max                     | 113.77 | 60.53  | 136.91 | 51.39 | 124.11 | 68.60 | 51.55 |
| Min                     | 69.35  | 51.17  | 69.31  | 33.23 | 78.38  | 57.47 | 19.46 |
| FOX 0.7+TMP 5+VAN 0.5   |        |        |        |       |        |       |       |
| Median (n=32)           | 75.22  | 55.82  | 94.89  | 40.97 | 80.06  | 53.53 | 3.85  |
| Max                     | 113.77 | 60.53  | 132.58 | 51.39 | 86.92  | 59.72 | 33.43 |
| Min                     | 69.35  | 51.17  | 62.31  | 33.23 | -4.66  | 42.30 | -1.61 |
| FUS 0.02+TMP 5+VAN 0.5  |        |        |        |       |        |       |       |
| Median (n=32)           | 95.69  | 55.82  | 94.89  | 50.63 | 109.37 | 53.53 | 61.54 |
| Max                     | 131.31 | 60.53  | 132.58 | 68.78 | 124.39 | 59.72 | 73.93 |
| Min                     | 68.66  | 51.17  | 62.31  | 38.72 | 92.71  | 42.30 | 29.40 |
| CHL 120+STR 2.8+TMP 5   |        |        |        |       |        |       |       |
| Median (n=16)           | 84.63  | 71.19  | 55.82  | 64.53 | 50.04  | 45.28 | 20.29 |
| Max                     | 91.82  | 105.54 | 60.53  | 87.71 | 69.42  | 55.20 | 30.54 |
| Min                     | 79.26  | 18.56  | 51.17  | 46.40 | 41.30  | 37.23 | 13.43 |
| CHL 120+STR 2.8+TOB 0.2 |        |        |        |       |        |       |       |

|                          |        |        |        |       |        |        |       |
|--------------------------|--------|--------|--------|-------|--------|--------|-------|
| Median (n=32)            | 84.63  | 71.19  | 97.75  | 64.53 | 68.21  | 67.94  | 39.46 |
| Max                      | 91.82  | 105.54 | 136.91 | 87.71 | 81.29  | 84.18  | 45.99 |
| Min                      | 79.26  | 18.56  | 69.31  | 46.40 | 48.32  | 3.91   | 7.21  |
| CHL 120+STR 2.8+VAN 0.5  |        |        |        |       |        |        |       |
| Median (n=32)            | 84.63  | 71.19  | 94.89  | 64.53 | 64.60  | 62.44  | 37.08 |
| Max                      | 91.82  | 105.54 | 132.58 | 87.71 | 68.18  | 72.65  | 46.78 |
| Min                      | 79.26  | 18.56  | 62.31  | 46.40 | 56.68  | -11.87 | 29.16 |
| CLI 0.04+STR 2.8+TOB 0.2 |        |        |        |       |        |        |       |
| Median (n=32)            | 99.43  | 71.19  | 97.75  | 81.21 | 90.92  | 67.94  | 66.11 |
| Max                      | 128.75 | 105.54 | 136.91 | 87.93 | 138.17 | 84.18  | 77.57 |
| Min                      | 85.73  | 18.56  | 69.31  | 8.12  | 64.61  | 3.91   | -3.23 |
| ERY 0.08+STR 2.8+TMP 5   |        |        |        |       |        |        |       |
| Median (n=16)            | 75.48  | 71.19  | 55.82  | 79.14 | 21.30  | 45.28  | 7.04  |
| Max                      | 81.90  | 105.54 | 60.53  | 96.35 | 41.77  | 55.20  | 23.48 |
| Min                      | 71.57  | 18.56  | 51.17  | 48.60 | 10.06  | 37.23  | -2.55 |
| ERY 0.08+STR 2.8+TOB 0.2 |        |        |        |       |        |        |       |
| Median (n=32)            | 75.48  | 71.19  | 97.75  | 79.14 | 94.59  | 67.94  | 65.37 |
| Max                      | 81.90  | 105.54 | 136.91 | 96.35 | 111.44 | 84.18  | 78.17 |
| Min                      | 71.57  | 18.56  | 69.31  | 48.60 | 68.61  | 3.91   | 59.11 |

|                          |       |        |        |       |        |        |       |
|--------------------------|-------|--------|--------|-------|--------|--------|-------|
| ERY 0.08+STR 2.8+VAN 0.5 |       |        |        |       |        |        |       |
| Median (n=32)            | 75.48 | 71.19  | 94.89  | 79.14 | 103.91 | 62.44  | 63.38 |
| Max                      | 81.90 | 105.54 | 132.58 | 96.35 | 124.03 | 72.65  | 78.04 |
| Min                      | 71.57 | 18.56  | 62.31  | 48.60 | 92.44  | -11.87 | -1.61 |
| CHL 120+TMP 5+TOB 0.2    |       |        |        |       |        |        |       |
| Median (n=32)            | 84.63 | 55.82  | 97.75  | 50.04 | 68.21  | 59.59  | 41.72 |
| Max                      | 91.82 | 60.53  | 136.91 | 69.42 | 81.29  | 68.60  | 56.95 |
| Min                      | 79.26 | 51.17  | 69.31  | 41.30 | 48.32  | 57.47  | 29.70 |
| CPR 0.2+TOB 0.2+VAN 0.5  |       |        |        |       |        |        |       |
| Median (n=32)            | 78.04 | 97.75  | 94.89  | 52.41 | 58.63  | 102.49 | 49.00 |
| Max                      | 89.38 | 136.91 | 132.58 | 59.02 | 61.45  | 113.36 | 56.11 |
| Min                      | 61.17 | 69.31  | 62.31  | 45.63 | 51.51  | 93.41  | 22.84 |
| ERY 0.08+TMP 5+TOB 0.2   |       |        |        |       |        |        |       |
| Median (n=32)            | 75.48 | 55.82  | 97.75  | 21.30 | 94.59  | 59.59  | 15.56 |
| Max                      | 81.90 | 60.53  | 136.91 | 41.77 | 111.44 | 68.60  | 36.01 |
| Min                      | 71.57 | 51.17  | 69.31  | 10.06 | 68.61  | 57.47  | -2.58 |
| CHL 120+TOB 0.2+VAN 0.5  |       |        |        |       |        |        |       |
| Median (n=32)            | 84.63 | 97.75  | 94.89  | 68.21 | 64.60  | 102.49 | 57.75 |
| Max                      | 91.82 | 136.91 | 132.58 | 81.29 | 68.18  | 113.36 | 83.21 |

|                          |        |        |        |        |        |        |        |
|--------------------------|--------|--------|--------|--------|--------|--------|--------|
| Min                      | 79.26  | 69.31  | 62.31  | 48.32  | 56.68  | 93.41  | 37.43  |
| CLI 0.04+TOB 0.2+VAN 0.5 |        |        |        |        |        |        |        |
| Median (n=32)            | 84.63  | 97.75  | 94.89  | 90.92  | 64.60  | 102.49 | 91.88  |
| Max                      | 91.82  | 136.91 | 132.58 | 138.17 | 68.18  | 113.36 | 121.65 |
| Min                      | 79.26  | 69.31  | 62.31  | 64.61  | 56.68  | 93.41  | 27.77  |
| ERY 0.08+TOB 0.2+VAN 0.5 |        |        |        |        |        |        |        |
| Median (n=32)            | 75.48  | 97.75  | 94.89  | 94.59  | 103.91 | 102.49 | 90.03  |
| Max                      | 81.90  | 136.91 | 132.58 | 111.44 | 124.03 | 113.36 | 129.25 |
| Min                      | 71.57  | 69.31  | 62.31  | 68.61  | 92.44  | 93.41  | 66.60  |
| FOX 0.7+STR 2.8+VAN 0.5  |        |        |        |        |        |        |        |
| Median (n=32)            | 75.22  | 71.19  | 94.89  | 65.35  | 80.06  | 62.44  | 66.81  |
| Max                      | 113.77 | 105.54 | 132.58 | 88.02  | 86.92  | 72.65  | 75.66  |
| Min                      | 69.35  | 18.56  | 62.31  | 53.01  | -4.66  | -11.87 | -3.18  |
| FOX 0.7+TOB 0.2+VAN 0.5  |        |        |        |        |        |        |        |
| Median (n=32)            | 75.22  | 97.75  | 94.89  | 103.02 | 80.06  | 102.49 | 85.31  |
| Max                      | 113.77 | 136.91 | 132.58 | 124.11 | 86.92  | 113.36 | 116.81 |
| Min                      | 69.35  | 69.31  | 62.31  | 78.38  | -4.66  | 93.41  | 70.53  |
| FUS 0.02+TOB 0.2+VAN 0.5 |        |        |        |        |        |        |        |
| Median (n=32)            | 95.69  | 97.75  | 94.89  | 88.95  | 109.37 | 102.49 | 86.61  |

|                          |        |        |        |        |        |        |        |
|--------------------------|--------|--------|--------|--------|--------|--------|--------|
| Max                      | 131.31 | 136.91 | 132.58 | 103.73 | 124.39 | 113.36 | 115.05 |
| Min                      | 68.66  | 69.31  | 62.31  | 70.58  | 92.71  | 93.41  | 52.76  |
| AMP 0.25+CHL 120+NTR 20  |        |        |        |        |        |        |        |
| Median (n=32)            | 96.19  | 99.22  | 83.19  | 53.91  | 42.49  | -2.18  | -6.46  |
| Max                      | 103.71 | 102.38 | 113.27 | 106.21 | 126.61 | 8.13   | 1.21   |
| Min                      | 91.41  | 92.59  | 65.04  | -8.84  | 16.61  | -8.65  | -16.44 |
| AMP 0.25+CLI 0.04+NTR 20 |        |        |        |        |        |        |        |
| Median (n=32)            | 96.19  | 106.46 | 83.19  | 74.96  | 42.49  | 52.85  | -7.05  |
| Max                      | 103.71 | 111.15 | 113.27 | 86.29  | 126.61 | 84.83  | 10.39  |
| Min                      | 91.41  | 96.85  | 65.04  | 62.59  | 16.61  | 17.86  | -15.74 |
| AMP 0.25+CPR 0.15+NTR 20 |        |        |        |        |        |        |        |
| Median (n=32)            | 96.19  | 91.80  | 83.19  | 70.27  | 42.49  | 91.17  | 33.06  |
| Max                      | 103.71 | 126.70 | 113.27 | 108.11 | 126.61 | 109.30 | 100.43 |
| Min                      | 91.41  | 80.38  | 65.04  | 59.24  | 16.61  | 70.09  | -0.34  |
| AMP 0.25+DOX 0.9+NTR 20  |        |        |        |        |        |        |        |
| Median (n=32)            | 96.19  | 84.25  | 83.19  | 52.95  | 42.49  | 3.41   | -10.71 |
| Max                      | 103.71 | 94.76  | 113.27 | 109.43 | 126.61 | 20.42  | 24.91  |
| Min                      | 91.41  | 72.51  | 65.04  | 40.26  | 16.61  | -17.15 | -18.42 |
| AMP 0.25+ERY 0.07+NTR 20 |        |        |        |        |        |        |        |

|                          |        |        |        |        |        |        |        |
|--------------------------|--------|--------|--------|--------|--------|--------|--------|
| Median (n=32)            | 96.19  | 94.33  | 83.19  | 87.85  | 42.49  | -4.67  | -10.91 |
| Max                      | 103.71 | 117.27 | 113.27 | 159.19 | 126.61 | 7.43   | 25.97  |
| Min                      | 91.41  | 79.10  | 65.04  | 82.92  | 16.61  | -13.46 | -14.37 |
| AMP 0.25+FOX 0.7+NTR 20  |        |        |        |        |        |        |        |
| Median (n=32)            | 96.19  | 78.10  | 83.19  | 70.30  | 42.49  | 56.19  | 10.68  |
| Max                      | 103.71 | 125.01 | 113.27 | 77.13  | 126.61 | 81.60  | 88.88  |
| Min                      | 91.41  | 68.65  | 65.04  | 64.36  | 16.61  | 28.08  | -15.99 |
| AMP 0.25+FUS 0.02+NTR 20 |        |        |        |        |        |        |        |
| Median (n=32)            | 96.19  | 94.12  | 83.19  | 83.58  | 42.49  | 58.25  | 6.67   |
| Max                      | 103.71 | 107.80 | 113.27 | 101.66 | 126.61 | 89.03  | 98.37  |
| Min                      | 91.41  | 82.11  | 65.04  | 74.06  | 16.61  | 37.74  | -22.38 |
| AMP 0.25+GEN 0.02+NTR 20 |        |        |        |        |        |        |        |
| Median (n=32)            | 96.19  | 102.73 | 83.19  | 100.76 | 42.49  | 0.70   | -5.78  |
| Max                      | 103.71 | 128.07 | 113.27 | 110.97 | 126.61 | 71.31  | 25.45  |
| Min                      | 91.41  | 95.16  | 65.04  | 95.72  | 16.61  | -18.54 | -19.88 |
| AMP 0.25+NTR 20+STR 2.5  |        |        |        |        |        |        |        |
| Median (n=32)            | 96.19  | 83.19  | 85.53  | 42.49  | 62.55  | -9.26  | -5.55  |
| Max                      | 103.71 | 113.27 | 88.88  | 126.61 | 94.99  | -6.05  | 118.32 |
| Min                      | 91.41  | 65.04  | 75.78  | 16.61  | 47.67  | -15.84 | -19.25 |

|                         |        |        |        |        |        |        |        |
|-------------------------|--------|--------|--------|--------|--------|--------|--------|
| AMP 0.25+NTR 20+TMP 5   |        |        |        |        |        |        |        |
| Median (n=32)           | 96.19  | 83.19  | 86.60  | 42.49  | 83.21  | 1.96   | 1.21   |
| Max                     | 103.71 | 113.27 | 99.83  | 126.61 | 88.36  | 17.63  | 112.64 |
| Min                     | 91.41  | 65.04  | 73.41  | 16.61  | 78.31  | -10.20 | -17.42 |
| AMP 0.3+NTR 20+TOB 0.2  |        |        |        |        |        |        |        |
| Median (n=32)           | 96.19  | 83.19  | 105.58 | 42.49  | 100.04 | 6.01   | -4.27  |
| Max                     | 103.71 | 113.27 | 120.42 | 126.61 | 107.78 | 42.16  | 37.38  |
| Min                     | 91.41  | 65.04  | 100.20 | 16.61  | 98.39  | -1.93  | -20.85 |
| AMP 0.25+NTR 20+VAN 0.4 |        |        |        |        |        |        |        |
| Median (n=32)           | 96.19  | 83.19  | 99.60  | 42.49  | 44.95  | 1.58   | -8.98  |
| Max                     | 103.71 | 113.27 | 123.10 | 126.61 | 124.37 | 59.41  | 27.93  |
| Min                     | 91.41  | 65.04  | 94.45  | 16.61  | 2.86   | -17.36 | -16.23 |
| GEN 0.2+NTR 20+STR 2.5  |        |        |        |        |        |        |        |
| Median (n=32)           | 102.73 | 83.19  | 85.53  | 0.70   | 59.83  | -9.26  | -15.77 |
| Max                     | 128.07 | 113.27 | 88.88  | 71.31  | 105.36 | -6.05  | 5.76   |
| Min                     | 95.16  | 65.04  | 75.78  | -18.54 | 47.68  | -15.84 | -27.92 |
| GEN 0.25+NTR 20+TMP 5   |        |        |        |        |        |        |        |
| Median (n=32)           | 102.73 | 83.19  | 86.60  | 0.70   | 75.09  | 1.96   | -12.99 |
| Max                     | 128.07 | 113.27 | 99.83  | 71.31  | 86.05  | 17.63  | 101.58 |

|                         |        |        |        |        |        |        |        |
|-------------------------|--------|--------|--------|--------|--------|--------|--------|
| Min                     | 95.16  | 65.04  | 73.41  | -18.54 | 67.25  | -10.20 | -23.67 |
| GEN 0.25+NTR 20+TOB 0.2 |        |        |        |        |        |        |        |
| Median (n=32)           | 102.73 | 83.19  | 105.58 | 0.70   | 90.97  | 6.01   | -11.34 |
| Max                     | 128.07 | 113.27 | 120.42 | 71.31  | 100.32 | 42.16  | 104.58 |
| Min                     | 95.16  | 65.04  | 100.20 | -18.54 | 79.00  | -1.93  | -22.71 |
| GEN 0.2+NTR 20+VAN 0.4  |        |        |        |        |        |        |        |
| Median (n=32)           | 102.73 | 83.19  | 99.60  | 0.70   | 92.85  | 1.58   | -6.05  |
| Max                     | 128.07 | 113.27 | 123.10 | 71.31  | 114.28 | 59.41  | 33.22  |
| Min                     | 95.16  | 65.04  | 94.45  | -18.54 | 81.87  | -17.36 | -12.68 |
| CHL 120+CLI 0.04+NTR 20 |        |        |        |        |        |        |        |
| Median (n=32)           | 99.22  | 106.46 | 83.19  | 72.96  | -2.18  | 52.85  | -3.39  |
| Max                     | 102.38 | 111.15 | 113.27 | 91.20  | 8.13   | 84.83  | 13.42  |
| Min                     | 92.59  | 96.85  | 65.04  | 51.62  | -8.65  | 17.86  | -6.93  |
| CHL 120+DOX 0.9+NTR 20  |        |        |        |        |        |        |        |
| Median (n=32)           | 99.22  | 84.25  | 83.19  | 34.24  | -2.18  | 3.41   | -8.75  |
| Max                     | 102.38 | 94.76  | 113.27 | 58.47  | 8.13   | 20.42  | 0.79   |
| Min                     | 92.59  | 72.51  | 65.04  | 17.25  | -8.65  | -17.15 | -12.94 |
| CHL 120+ERY 0.07+NTR 20 |        |        |        |        |        |        |        |
| Median (n=32)           | 99.22  | 94.33  | 83.19  | 32.15  | -2.18  | -4.67  | -10.37 |



|                         |        |        |        |       |       |        |        |
|-------------------------|--------|--------|--------|-------|-------|--------|--------|
| Max                     | 102.38 | 117.27 | 113.27 | 47.70 | 8.13  | 7.43   | -1.73  |
| Min                     | 92.59  | 79.10  | 65.04  | 5.22  | -8.65 | -13.46 | -15.05 |
| CHL 120+FOX 0.7+NTR 20  |        |        |        |       |       |        |        |
| Median (n=32)           | 99.22  | 78.10  | 83.19  | 48.53 | -2.18 | 56.19  | -7.53  |
| Max                     | 102.38 | 125.01 | 113.27 | 61.71 | 8.13  | 81.60  | 10.10  |
| Min                     | 92.59  | 68.65  | 65.04  | 29.24 | -8.65 | 28.08  | -15.04 |
| CHL 120+FUS 0.02+NTR 20 |        |        |        |       |       |        |        |
| Median (n=32)           | 99.22  | 94.12  | 83.19  | 13.68 | -2.18 | 58.25  | -8.46  |
| Max                     | 102.38 | 107.80 | 113.27 | 22.30 | 8.13  | 89.03  | 2.03   |
| Min                     | 92.59  | 82.11  | 65.04  | 10.34 | -8.65 | 37.74  | -20.13 |
| CHL 120+GEN 0.2+NTR 20  |        |        |        |       |       |        |        |
| Median (n=32)           | 99.22  | 102.73 | 83.19  | 57.56 | -2.18 | 0.70   | -10.49 |
| Max                     | 102.38 | 128.07 | 113.27 | 89.63 | 8.13  | 71.31  | -0.57  |
| Min                     | 92.59  | 95.16  | 65.04  | 50.61 | -8.65 | -18.54 | -18.38 |
| CHL 120+NTR 20+STR 2.5  |        |        |        |       |       |        |        |
| Median (n=32)           | 99.22  | 83.19  | 85.53  | -2.18 | 56.26 | -9.26  | -11.73 |
| Max                     | 102.38 | 113.27 | 88.88  | 8.13  | 70.69 | -6.05  | -8.48  |
| Min                     | 92.59  | 65.04  | 75.78  | -8.65 | 42.03 | -15.84 | -19.95 |
| CHL 120+NTR 20+TMP 5    |        |        |        |       |       |        |        |

|                        |        |        |        |        |        |        |        |
|------------------------|--------|--------|--------|--------|--------|--------|--------|
| Median (n=32)          | 99.22  | 83.19  | 86.60  | -2.18  | 68.27  | 1.96   | -13.90 |
| Max                    | 102.38 | 113.27 | 99.83  | 8.13   | 86.92  | 17.63  | -4.43  |
| Min                    | 92.59  | 65.04  | 73.41  | -8.65  | 33.36  | -10.20 | -16.87 |
| CHL 120+NTR 20+TOB 0.2 |        |        |        |        |        |        |        |
| Median (n=32)          | 99.22  | 83.19  | 105.58 | -2.18  | 89.44  | 6.01   | -11.26 |
| Max                    | 102.38 | 113.27 | 120.42 | 8.13   | 102.56 | 42.16  | 5.76   |
| Min                    | 92.59  | 65.04  | 100.20 | -8.65  | 68.11  | -1.93  | -19.85 |
| CHL 120+NTR 20+VAN 0.4 |        |        |        |        |        |        |        |
| Median (n=32)          | 99.22  | 83.19  | 99.60  | -2.18  | 68.45  | 1.58   | -12.88 |
| Max                    | 102.38 | 113.27 | 123.10 | 8.13   | 103.13 | 59.41  | -8.48  |
| Min                    | 92.59  | 65.04  | 94.45  | -8.65  | 39.77  | -17.36 | -14.74 |
| NTR 20+STR 2.5+TMP 5   |        |        |        |        |        |        |        |
| Median (n=32)          | 83.19  | 85.53  | 86.60  | -9.26  | 1.96   | 72.49  | -4.13  |
| Max                    | 113.27 | 88.88  | 99.83  | -6.05  | 17.63  | 134.21 | 13.35  |
| Min                    | 65.04  | 75.78  | 73.41  | -15.84 | -10.20 | 65.03  | -13.66 |
| NTR 20+STR 2.5+TOB 0.2 |        |        |        |        |        |        |        |
| Median (n=32)          | 83.19  | 85.53  | 105.58 | -9.26  | 6.01   | 47.05  | 0.58   |
| Max                    | 113.27 | 88.88  | 120.42 | -6.05  | 42.16  | 71.87  | 25.32  |
| Min                    | 65.04  | 75.78  | 100.20 | -15.84 | -1.93  | 39.96  | -11.60 |

|                                 |        |        |        |        |        |        |       |
|---------------------------------|--------|--------|--------|--------|--------|--------|-------|
| <b>NTR 20+STR 2.5+VAN 0.4</b>   |        |        |        |        |        |        |       |
| Median (n=32)                   | 83.19  | 85.53  | 99.60  | -9.26  | 1.58   | 63.50  | -3.26 |
| Max                             | 113.27 | 88.88  | 123.10 | -6.05  | 59.41  | 100.61 | 0.81  |
| Min                             | 65.04  | 75.78  | 94.45  | -15.84 | -17.36 | 21.07  | -8.30 |
| <b>CLI 0.04+DOX 0.9+NTR 20</b>  |        |        |        |        |        |        |       |
| Median (n=32)                   | 106.46 | 84.25  | 83.19  | 34.12  | 52.85  | 3.41   | 8.99  |
| Max                             | 111.15 | 94.76  | 113.27 | 78.06  | 84.83  | 20.42  | 29.45 |
| Min                             | 96.85  | 72.51  | 65.04  | 21.22  | 17.86  | -17.15 | -5.00 |
| <b>CLI 0.04+ERY 0.07+NTR 20</b> |        |        |        |        |        |        |       |
| Median (n=32)                   | 106.46 | 94.33  | 83.19  | 81.95  | 52.85  | -4.67  | 13.11 |
| Max                             | 111.15 | 117.27 | 113.27 | 113.78 | 84.83  | 7.43   | 34.87 |
| Min                             | 96.85  | 79.10  | 65.04  | 66.47  | 17.86  | -13.46 | -0.68 |
| <b>CLI 0.04+FOX 0.7+NTR 20</b>  |        |        |        |        |        |        |       |
| Median (n=32)                   | 106.46 | 78.10  | 83.19  | 64.31  | 52.85  | 56.19  | 6.09  |
| Max                             | 111.15 | 125.01 | 113.27 | 71.88  | 84.83  | 81.60  | 57.11 |
| Min                             | 96.85  | 68.65  | 65.04  | 58.55  | 17.86  | 28.08  | 1.66  |
| <b>CLI 0.04+FUS 0.02+NTR 20</b> |        |        |        |        |        |        |       |
| Median (n=32)                   | 106.46 | 94.12  | 83.19  | 42.03  | 52.85  | 58.25  | -4.48 |
| Max                             | 111.15 | 107.80 | 113.27 | 49.76  | 84.83  | 89.03  | 24.18 |

|                         |        |        |        |        |       |        |        |
|-------------------------|--------|--------|--------|--------|-------|--------|--------|
| Min                     | 96.85  | 82.11  | 65.04  | 34.07  | 17.86 | 37.74  | -55.30 |
| CLI 0.04+GEN 0.2+NTR 20 |        |        |        |        |       |        |        |
| Median (n=32)           | 106.46 | 102.73 | 83.19  | 73.76  | 52.85 | 0.70   | -4.71  |
| Max                     | 111.15 | 128.07 | 113.27 | 101.00 | 84.83 | 71.31  | 8.61   |
| Min                     | 96.85  | 95.16  | 65.04  | -0.16  | 17.86 | -18.54 | -13.61 |
| CLI 0.04+NTR 20+STR 2.5 |        |        |        |        |       |        |        |
| Median (n=32)           | 106.46 | 83.19  | 85.53  | 52.85  | 8.36  | -9.26  | 2.53   |
| Max                     | 111.15 | 113.27 | 88.88  | 84.83  | 94.49 | -6.05  | 12.79  |
| Min                     | 96.85  | 65.04  | 75.78  | 17.86  | -6.91 | -15.84 | -8.67  |
| CLI 0.04+NTR 20+TMP 5   |        |        |        |        |       |        |        |
| Median (n=32)           | 106.46 | 83.19  | 86.60  | 52.85  | 71.56 | 1.96   | 0.47   |
| Max                     | 111.15 | 113.27 | 99.83  | 84.83  | 79.24 | 17.63  | 14.33  |
| Min                     | 96.85  | 65.04  | 73.41  | 17.86  | 65.01 | -10.20 | -9.18  |
| CLI 0.04+NTR 20+TOB 0.2 |        |        |        |        |       |        |        |
| Median (n=32)           | 106.46 | 83.19  | 105.58 | 52.85  | 85.76 | 6.01   | 2.13   |
| Max                     | 111.15 | 113.27 | 120.42 | 84.83  | 94.13 | 42.16  | 19.78  |
| Min                     | 96.85  | 65.04  | 100.20 | 17.86  | 72.29 | -1.93  | -9.18  |
| CLI 0.04+NTR 20+VAN 0.4 |        |        |        |        |       |        |        |
| Median (n=32)           | 106.46 | 83.19  | 99.60  | 52.85  | 87.67 | 1.58   | 10.99  |

|                         |        |        |        |        |        |        |        |
|-------------------------|--------|--------|--------|--------|--------|--------|--------|
| Max                     | 111.15 | 113.27 | 123.10 | 84.83  | 98.28  | 59.41  | 32.03  |
| Min                     | 96.85  | 65.04  | 94.45  | 17.86  | 77.72  | -17.36 | -13.64 |
| NTR 20+TMP 5+TOB 0.2    |        |        |        |        |        |        |        |
| Median (n=32)           | 83.19  | 86.60  | 105.58 | 1.96   | 6.01   | 76.78  | 4.38   |
| Max                     | 113.27 | 99.83  | 120.42 | 17.63  | 42.16  | 86.75  | 18.65  |
| Min                     | 65.04  | 73.41  | 100.20 | -10.20 | -1.93  | 72.19  | -7.48  |
| NTR 20+TMP 5+VAN 0.4    |        |        |        |        |        |        |        |
| Median (n=32)           | 83.19  | 86.60  | 99.60  | 1.96   | 1.58   | 84.53  | 1.75   |
| Max                     | 113.27 | 99.83  | 123.10 | 17.63  | 59.41  | 97.10  | 20.32  |
| Min                     | 65.04  | 73.41  | 94.45  | -10.20 | -17.36 | 79.82  | -4.32  |
| CHL 120+CPR 0.15+NTR 20 |        |        |        |        |        |        |        |
| Median (n=32)           | 99.22  | 91.80  | 83.19  | 56.18  | -2.18  | 91.17  | 3.53   |
| Max                     | 102.38 | 126.70 | 113.27 | 78.19  | 8.13   | 109.30 | 50.20  |
| Min                     | 92.59  | 80.38  | 65.04  | 43.89  | -8.65  | 70.09  | -13.39 |
| CLI 0.04+CPR 0.2+NTR 20 |        |        |        |        |        |        |        |
| Median (n=32)           | 106.46 | 91.80  | 83.19  | 78.20  | 52.85  | 91.17  | 52.43  |
| Max                     | 111.15 | 126.70 | 113.27 | 85.92  | 84.83  | 109.30 | 71.58  |
| Min                     | 96.85  | 80.38  | 65.04  | 70.44  | 17.86  | 70.09  | 14.13  |
| CPR 0.15+DOX 0.9+NTR 20 |        |        |        |        |        |        |        |

|                          |        |        |        |        |        |        |        |
|--------------------------|--------|--------|--------|--------|--------|--------|--------|
| Median (n=32)            | 91.80  | 84.25  | 83.19  | 76.87  | 91.17  | 3.41   | 23.78  |
| Max                      | 126.70 | 94.76  | 113.27 | 91.17  | 109.30 | 20.42  | 38.51  |
| Min                      | 80.38  | 72.51  | 65.04  | 67.23  | 70.09  | -17.15 | -2.77  |
| CPR 0.15+ERY 0.07+NTR 20 |        |        |        |        |        |        |        |
| Median (n=32)            | 91.80  | 94.33  | 83.19  | 73.29  | 91.17  | -4.67  | 20.89  |
| Max                      | 126.70 | 117.27 | 113.27 | 120.70 | 109.30 | 7.43   | 43.04  |
| Min                      | 80.38  | 79.10  | 65.04  | 63.13  | 70.09  | -13.46 | -7.13  |
| CPR 0.15+FOX 0.7+NTR 20  |        |        |        |        |        |        |        |
| Median (n=32)            | 91.80  | 78.10  | 83.19  | 56.15  | 91.17  | 56.19  | 46.30  |
| Max                      | 126.70 | 125.01 | 113.27 | 61.36  | 109.30 | 81.60  | 81.17  |
| Min                      | 80.38  | 68.65  | 65.04  | 52.37  | 70.09  | 28.08  | 26.01  |
| CPR 0.15+FUS 0.02+NTR 20 |        |        |        |        |        |        |        |
| Median (n=32)            | 91.80  | 94.12  | 83.19  | 78.98  | 91.17  | 58.25  | 40.94  |
| Max                      | 126.70 | 107.80 | 113.27 | 86.48  | 109.30 | 89.03  | 118.83 |
| Min                      | 80.38  | 82.11  | 65.04  | 74.43  | 70.09  | 37.74  | -0.66  |
| CPR 0.15+GEN 0.2+NTR 20  |        |        |        |        |        |        |        |
| Median (n=32)            | 91.80  | 102.73 | 83.19  | 88.22  | 91.17  | 0.70   | 14.26  |
| Max                      | 126.70 | 128.07 | 113.27 | 127.26 | 109.30 | 71.31  | 34.35  |
| Min                      | 80.38  | 95.16  | 65.04  | 66.70  | 70.09  | -18.54 | -2.26  |

|                         |        |        |        |        |        |        |       |
|-------------------------|--------|--------|--------|--------|--------|--------|-------|
| CPR 0.15+NTR 20+STR 2.5 |        |        |        |        |        |        |       |
| Median (n=32)           | 91.80  | 83.19  | 85.53  | 91.17  | 74.67  | -9.26  | 10.89 |
| Max                     | 126.70 | 113.27 | 88.88  | 109.30 | 80.99  | -6.05  | 19.08 |
| Min                     | 80.38  | 65.04  | 75.78  | 70.09  | 57.38  | -15.84 | -0.95 |
| CPR 0.15+NTR 20+TMP 5   |        |        |        |        |        |        |       |
| Median (n=32)           | 91.80  | 83.19  | 86.60  | 91.17  | 59.55  | 1.96   | 3.26  |
| Max                     | 126.70 | 113.27 | 99.83  | 109.30 | 61.72  | 17.63  | 10.66 |
| Min                     | 80.38  | 65.04  | 73.41  | 70.09  | 57.91  | -10.20 | 0.91  |
| CPR 0.15+NTR 20+TOB 0.2 |        |        |        |        |        |        |       |
| Median (n=32)           | 91.80  | 83.19  | 105.58 | 91.17  | 79.67  | 6.01   | 10.04 |
| Max                     | 126.70 | 113.27 | 120.42 | 109.30 | 83.27  | 42.16  | 98.74 |
| Min                     | 80.38  | 65.04  | 100.20 | 70.09  | 74.63  | -1.93  | 0.43  |
| CPR 0.15+NTR 20+VAN 0.4 |        |        |        |        |        |        |       |
| Median (n=32)           | 91.80  | 83.19  | 99.60  | 91.17  | 72.41  | 1.58   | 72.62 |
| Max                     | 126.70 | 113.27 | 123.10 | 109.30 | 121.13 | 59.41  | 92.73 |
| Min                     | 80.38  | 65.04  | 94.45  | 70.09  | 67.69  | -17.36 | 9.43  |
| NTR 20+TOB 0.2+VAN 0.4  |        |        |        |        |        |        |       |
| Median (n=32)           | 83.19  | 105.58 | 99.60  | 6.01   | 1.58   | 99.17  | 11.93 |
| Max                     | 113.27 | 120.42 | 123.10 | 42.16  | 59.41  | 125.65 | 93.95 |

|                                |       |        |        |        |        |        |        |
|--------------------------------|-------|--------|--------|--------|--------|--------|--------|
| Min                            | 65.04 | 100.20 | 94.45  | -1.93  | -17.36 | 92.28  | 0.09   |
| <b>DOX 0.9+ERY 0.07+NTR 20</b> |       |        |        |        |        |        |        |
| Median (n=32)                  | 84.25 | 94.33  | 83.19  | 7.67   | 3.41   | -4.67  | -7.56  |
| Max                            | 94.76 | 117.27 | 113.27 | 87.95  | 20.42  | 7.43   | -2.51  |
| Min                            | 72.51 | 79.10  | 65.04  | -7.69  | -17.15 | -13.46 | -14.74 |
| <b>DOX 0.9+FOX 0.7+NTR 20</b>  |       |        |        |        |        |        |        |
| Median (n=32)                  | 84.25 | 78.10  | 83.19  | 60.25  | 3.41   | 56.19  | -6.97  |
| Max                            | 94.76 | 125.01 | 113.27 | 67.10  | 20.42  | 81.60  | 20.74  |
| Min                            | 72.51 | 68.65  | 65.04  | 55.61  | -17.15 | 28.08  | -14.47 |
| <b>DOX 0.9+FUS 0.02+NTR 20</b> |       |        |        |        |        |        |        |
| Median (n=32)                  | 84.25 | 94.12  | 83.19  | 34.19  | 3.41   | 58.25  | -2.19  |
| Max                            | 94.76 | 107.80 | 113.27 | 49.15  | 20.42  | 89.03  | 48.26  |
| Min                            | 72.51 | 82.11  | 65.04  | 25.03  | -17.15 | 37.74  | -13.09 |
| <b>DOX 0.9+GEN 0.2+NTR 20</b>  |       |        |        |        |        |        |        |
| Median (n=32)                  | 84.25 | 102.73 | 83.19  | 86.06  | 3.41   | 0.70   | -4.48  |
| Max                            | 94.76 | 128.07 | 113.27 | 113.82 | 20.42  | 71.31  | 102.44 |
| Min                            | 72.51 | 95.16  | 65.04  | 52.18  | -17.15 | -18.54 | -14.65 |
| <b>DOX 0.9+NTR 20+STR 2.5</b>  |       |        |        |        |        |        |        |
| Median (n=32)                  | 84.25 | 83.19  | 85.53  | 3.41   | 7.36   | -9.26  | -8.71  |



|                          |        |        |        |        |        |        |        |
|--------------------------|--------|--------|--------|--------|--------|--------|--------|
| Max                      | 94.76  | 113.27 | 88.88  | 20.42  | 78.81  | -6.05  | 13.72  |
| Min                      | 72.51  | 65.04  | 75.78  | -17.15 | -11.02 | -15.84 | -19.67 |
| DOX 0.9+NTR 20+TMP 5     |        |        |        |        |        |        |        |
| Median (n=32)            | 84.25  | 83.19  | 86.60  | 3.41   | 61.33  | 1.96   | -13.35 |
| Max                      | 94.76  | 113.27 | 99.83  | 20.42  | 72.45  | 17.63  | -5.89  |
| Min                      | 72.51  | 65.04  | 73.41  | -17.15 | 56.34  | -10.20 | -17.36 |
| DOX 0.9+NTR 20+TOB 0.2   |        |        |        |        |        |        |        |
| Median (n=32)            | 84.25  | 83.19  | 105.58 | 3.41   | 80.20  | 6.01   | -8.73  |
| Max                      | 94.76  | 113.27 | 120.42 | 20.42  | 86.86  | 42.16  | 25.49  |
| Min                      | 72.51  | 65.04  | 100.20 | -17.15 | 64.44  | -1.93  | -17.51 |
| DOX 0.9+NTR 20+VAN 0.4   |        |        |        |        |        |        |        |
| Median (n=32)            | 84.25  | 83.19  | 99.60  | 3.41   | 76.38  | 1.58   | -14.94 |
| Max                      | 94.76  | 113.27 | 123.10 | 20.42  | 106.28 | 59.41  | 38.44  |
| Min                      | 72.51  | 65.04  | 94.45  | -17.15 | 63.45  | -17.36 | -26.56 |
| ERY 0.07+FOX 0.7+NTR 20  |        |        |        |        |        |        |        |
| Median (n=32)            | 94.33  | 78.10  | 83.19  | 66.56  | -4.67  | 56.19  | -2.31  |
| Max                      | 117.27 | 125.01 | 113.27 | 71.64  | 7.43   | 81.60  | 9.93   |
| Min                      | 79.10  | 68.65  | 65.04  | 57.85  | -13.46 | 28.08  | -24.01 |
| ERY 0.07+FUS 0.02+NTR 20 |        |        |        |        |        |        |        |

|                         |        |        |        |        |        |        |        |
|-------------------------|--------|--------|--------|--------|--------|--------|--------|
| Median (n=32)           | 94.33  | 94.12  | 83.19  | 48.14  | -4.67  | 58.25  | 1.16   |
| Max                     | 117.27 | 107.80 | 113.27 | 63.49  | 7.43   | 89.03  | 30.82  |
| Min                     | 79.10  | 82.11  | 65.04  | 31.10  | -13.46 | 37.74  | -15.28 |
| ERY 0.07+GEN 0.2+NTR 20 |        |        |        |        |        |        |        |
| Median (n=32)           | 94.33  | 102.73 | 83.19  | 103.35 | -4.67  | 0.70   | -6.85  |
| Max                     | 117.27 | 128.07 | 113.27 | 109.17 | 7.43   | 71.31  | 7.73   |
| Min                     | 79.10  | 95.16  | 65.04  | 92.86  | -13.46 | -18.54 | -12.38 |
| ERY 0.07+NTR 20+STR 2.5 |        |        |        |        |        |        |        |
| Median (n=32)           | 94.33  | 83.19  | 85.53  | -4.67  | 61.93  | -9.26  | -11.74 |
| Max                     | 117.27 | 113.27 | 88.88  | 7.43   | 90.83  | -6.05  | 8.32   |
| Min                     | 79.10  | 65.04  | 75.78  | -13.46 | 44.37  | -15.84 | -20.15 |
| ERY 0.07+NTR 20+TMP 5   |        |        |        |        |        |        |        |
| Median (n=32)           | 94.33  | 83.19  | 86.60  | -4.67  | 74.67  | 1.96   | -13.37 |
| Max                     | 117.27 | 113.27 | 99.83  | 7.43   | 81.42  | 17.63  | 10.62  |
| Min                     | 79.10  | 65.04  | 73.41  | -13.46 | 71.53  | -10.20 | -17.04 |
| ERY 0.07+NTR 20+TOB 0.2 |        |        |        |        |        |        |        |
| Median (n=32)           | 94.33  | 83.19  | 105.58 | -4.67  | 96.39  | 6.01   | -10.67 |
| Max                     | 117.27 | 113.27 | 120.42 | 7.43   | 100.63 | 42.16  | -3.95  |
| Min                     | 79.10  | 65.04  | 100.20 | -13.46 | 91.48  | -1.93  | -16.94 |

|                                |        |        |        |        |        |        |        |
|--------------------------------|--------|--------|--------|--------|--------|--------|--------|
| <b>ERY 0.07+NTR 20+VAN 0.4</b> |        |        |        |        |        |        |        |
| Median (n=32)                  | 94.33  | 83.19  | 99.60  | -4.67  | 101.47 | 1.58   | -5.91  |
| Max                            | 117.27 | 113.27 | 123.10 | 7.43   | 117.56 | 59.41  | 45.07  |
| Min                            | 79.10  | 65.04  | 94.45  | -13.46 | 89.18  | -17.36 | -17.21 |
| <b>FOX 0.7+FUS 0.02+NTR 20</b> |        |        |        |        |        |        |        |
| Median (n=32)                  | 78.10  | 94.12  | 83.19  | 67.29  | 56.19  | 58.25  | 11.42  |
| Max                            | 125.01 | 107.80 | 113.27 | 72.88  | 81.60  | 89.03  | 51.32  |
| Min                            | 68.65  | 82.11  | 65.04  | 57.89  | 28.08  | 37.74  | -1.83  |
| <b>FOX 0.7+GEN 0.2+NTR 20</b>  |        |        |        |        |        |        |        |
| Median (n=32)                  | 78.10  | 102.73 | 83.19  | 84.75  | 56.19  | 0.70   | 7.75   |
| Max                            | 125.01 | 128.07 | 113.27 | 100.95 | 81.60  | 71.31  | 45.52  |
| Min                            | 68.65  | 95.16  | 65.04  | 78.45  | 28.08  | -18.54 | -7.82  |
| <b>FOX 0.7+NTR 20+STR 2.5</b>  |        |        |        |        |        |        |        |
| Median (n=32)                  | 78.10  | 83.19  | 85.53  | 56.19  | 61.11  | -9.26  | 5.73   |
| Max                            | 125.01 | 113.27 | 88.88  | 81.60  | 78.69  | -6.05  | 12.92  |
| Min                            | 68.65  | 65.04  | 75.78  | 28.08  | 44.45  | -15.84 | -16.62 |
| <b>FOX 0.7+NTR 20+TMP 5</b>    |        |        |        |        |        |        |        |
| Median (n=32)                  | 78.10  | 83.19  | 86.60  | 56.19  | 60.80  | 1.96   | -1.19  |
| Max                            | 125.01 | 113.27 | 99.83  | 81.60  | 64.60  | 17.63  | 24.07  |

|                                |        |        |        |       |        |        |        |
|--------------------------------|--------|--------|--------|-------|--------|--------|--------|
| Min                            | 68.65  | 65.04  | 73.41  | 28.08 | 57.02  | -10.20 | -11.71 |
| <b>FOX 0.7+NTR 20+TOB 0.2</b>  |        |        |        |       |        |        |        |
| Median (n=32)                  | 78.10  | 83.19  | 105.58 | 56.19 | 82.34  | 6.01   | -5.02  |
| Max                            | 125.01 | 113.27 | 120.42 | 81.60 | 90.56  | 42.16  | 9.80   |
| Min                            | 68.65  | 65.04  | 100.20 | 28.08 | 76.53  | -1.93  | -14.35 |
| <b>FOX 0.7+NTR 20+VAN 0.4</b>  |        |        |        |       |        |        |        |
| Median (n=32)                  | 78.10  | 83.19  | 99.60  | 56.19 | 13.57  | 1.58   | -4.85  |
| Max                            | 125.01 | 113.27 | 123.10 | 81.60 | 91.37  | 59.41  | 9.07   |
| Min                            | 68.65  | 65.04  | 94.45  | 28.08 | -0.69  | -17.36 | -15.45 |
| <b>FUS 0.02+GEN 0.2+NTR 20</b> |        |        |        |       |        |        |        |
| Median (n=32)                  | 94.12  | 102.73 | 83.19  | 85.56 | 58.25  | 0.70   | 31.32  |
| Max                            | 107.80 | 128.07 | 113.27 | 97.66 | 89.03  | 71.31  | 135.15 |
| Min                            | 82.11  | 95.16  | 65.04  | 58.83 | 37.74  | -18.54 | -8.08  |
| <b>FUS 0.02+NTR 20+STR 2.5</b> |        |        |        |       |        |        |        |
| Median (n=32)                  | 94.12  | 83.19  | 85.53  | 58.25 | 55.38  | -9.26  | 3.38   |
| Max                            | 107.80 | 113.27 | 88.88  | 89.03 | 103.03 | -6.05  | 55.21  |
| Min                            | 82.11  | 65.04  | 75.78  | 37.74 | 37.01  | -15.84 | -12.22 |
| <b>FUS 0.02+NTR 20+TMP 5</b>   |        |        |        |       |        |        |        |
| Median (n=32)                  | 94.12  | 83.19  | 86.60  | 58.25 | 70.64  | 1.96   | 15.37  |

|                           |        |        |        |        |        |        |       |
|---------------------------|--------|--------|--------|--------|--------|--------|-------|
| Max                       | 107.80 | 113.27 | 99.83  | 89.03  | 83.59  | 17.63  | 41.50 |
| Min                       | 82.11  | 65.04  | 73.41  | 37.74  | 60.41  | -10.20 | -4.16 |
| FUS 0.02+NTR 20+TOB 0.2   |        |        |        |        |        |        |       |
| Median (n=32)             | 94.12  | 83.19  | 105.58 | 58.25  | 83.88  | 6.01   | 5.30  |
| Max                       | 107.80 | 113.27 | 120.42 | 89.03  | 96.01  | 42.16  | 39.74 |
| Min                       | 82.11  | 65.04  | 100.20 | 37.74  | 62.74  | -1.93  | -1.41 |
| FUS 0.02+NTR 20+VAN 0.4   |        |        |        |        |        |        |       |
| Median (n=32)             | 94.12  | 83.19  | 99.60  | 58.25  | 86.16  | 1.58   | 7.62  |
| Max                       | 107.80 | 113.27 | 123.10 | 89.03  | 104.11 | 59.41  | 41.67 |
| Min                       | 82.11  | 65.04  | 94.45  | 37.74  | 78.85  | -17.36 | -0.30 |
| AMP 0.25+DOX 0.9+STR 2.5  |        |        |        |        |        |        |       |
| Median (n=16)             | 96.19  | 84.25  | 85.53  | 52.95  | 62.55  | 7.36   | 7.44  |
| Max                       | 103.71 | 94.76  | 88.88  | 109.43 | 94.99  | 78.81  | 94.35 |
| Min                       | 91.41  | 72.51  | 75.78  | 40.26  | 47.67  | -11.02 | -7.40 |
| AMP 0.25+DOX 0.9+ERY 0.07 |        |        |        |        |        |        |       |
| Median (n=16)             | 96.19  | 84.25  | 94.33  | 52.95  | 87.85  | 7.67   | 14.66 |
| Max                       | 103.71 | 94.76  | 117.27 | 109.43 | 159.19 | 87.95  | 46.33 |
| Min                       | 91.41  | 72.51  | 79.10  | 40.26  | 82.92  | -7.69  | -0.45 |
| AMP 0.25+GEN 0.2+STR 2.5  |        |        |        |        |        |        |       |

|                           |        |        |        |        |        |        |        |
|---------------------------|--------|--------|--------|--------|--------|--------|--------|
| Median (n=16)             | 96.19  | 102.73 | 85.53  | 100.76 | 62.55  | 59.83  | 24.05  |
| Max                       | 103.71 | 128.07 | 88.88  | 110.97 | 94.99  | 105.36 | 47.96  |
| Min                       | 91.41  | 95.16  | 75.78  | 95.72  | 47.67  | 47.68  | -6.31  |
| AMP 0.25+CHL 120+VAN 0.4  |        |        |        |        |        |        |        |
| Median (n=8)              | 96.19  | 99.22  | 99.60  | 53.91  | 44.95  | 68.45  | 4.62   |
| Max                       | 103.71 | 102.38 | 123.10 | 106.21 | 124.37 | 103.13 | 82.86  |
| Min                       | 91.41  | 92.59  | 94.45  | -8.84  | 2.86   | 39.77  | -8.67  |
| AMP 0.25+CHL 120+STR 2.5  |        |        |        |        |        |        |        |
| Median (n=8)              | 96.19  | 99.22  | 85.53  | 53.91  | 62.55  | 56.26  | 5.67   |
| Max                       | 103.71 | 102.38 | 88.88  | 106.21 | 94.99  | 70.69  | 20.97  |
| Min                       | 91.41  | 92.59  | 75.78  | -8.84  | 47.67  | 42.03  | -13.31 |
| AMP 0.25+ERY 0.07+VAN 0.4 |        |        |        |        |        |        |        |
| Median (n=16)             | 96.19  | 94.33  | 99.60  | 87.85  | 44.95  | 101.47 | 0.41   |
| Max                       | 103.71 | 117.27 | 123.10 | 159.19 | 124.37 | 117.56 | 110.64 |
| Min                       | 91.41  | 79.10  | 94.45  | 82.92  | 2.86   | 89.18  | -14.00 |
| AMP 0.25+ERY 0.07+STR 2.5 |        |        |        |        |        |        |        |
| Median (n=16)             | 96.19  | 94.33  | 85.53  | 87.85  | 62.55  | 61.93  | 11.17  |
| Max                       | 103.71 | 117.27 | 88.88  | 159.19 | 94.99  | 90.83  | 38.15  |
| Min                       | 91.41  | 79.10  | 75.78  | 82.92  | 47.67  | 44.37  | 1.58   |

|                          |        |        |        |        |        |        |        |
|--------------------------|--------|--------|--------|--------|--------|--------|--------|
| CPR 0.15+GEN 0.2+STR 2.5 |        |        |        |        |        |        |        |
| Median (n=16)            | 91.80  | 102.73 | 85.53  | 88.22  | 74.67  | 59.83  | 26.45  |
| Max                      | 126.70 | 128.07 | 88.88  | 127.26 | 80.99  | 105.36 | 90.71  |
| Min                      | 80.38  | 95.16  | 75.78  | 66.70  | 57.38  | 47.68  | 8.70   |
| CPR 0.15+STR 2.5+VAN 0.4 |        |        |        |        |        |        |        |
| Median (n=8)             | 91.80  | 85.53  | 99.60  | 74.67  | 72.41  | 63.50  | 21.80  |
| Max                      | 126.70 | 88.88  | 123.10 | 80.99  | 121.13 | 100.61 | 104.72 |
| Min                      | 80.38  | 75.78  | 94.45  | 57.38  | 67.69  | 21.07  | -0.24  |
| CHL 120+DOX 0.9+STR 2.5  |        |        |        |        |        |        |        |
| Median (n=8)             | 99.22  | 84.25  | 85.53  | 34.24  | 56.26  | 7.36   | 8.39   |
| Max                      | 102.38 | 94.76  | 88.88  | 58.47  | 70.69  | 78.81  | 14.18  |
| Min                      | 92.59  | 72.51  | 75.78  | 17.25  | 42.03  | -11.02 | 3.60   |
| CHL 120+DOX 0.9+ERY 0.07 |        |        |        |        |        |        |        |
| Median (n=16)            | 99.22  | 84.25  | 94.33  | 34.24  | 32.15  | 7.67   | 0.32   |
| Max                      | 102.38 | 94.76  | 117.27 | 58.47  | 47.70  | 87.95  | 13.23  |
| Min                      | 92.59  | 72.51  | 79.10  | 17.25  | 5.22   | -7.69  | -3.22  |
| CHL 120+GEN 0.2+STR 2.5  |        |        |        |        |        |        |        |
| Median (n=8)             | 99.22  | 102.73 | 85.53  | 57.56  | 56.26  | 59.83  | 2.82   |
| Max                      | 102.38 | 128.07 | 88.88  | 89.63  | 70.69  | 105.36 | 6.49   |

|                                  |        |        |        |       |        |       |        |
|----------------------------------|--------|--------|--------|-------|--------|-------|--------|
| Min                              | 92.59  | 95.16  | 75.78  | 50.61 | 42.03  | 47.68 | -0.77  |
| <b>CHL 120+CPR 0.15+STR 2.5</b>  |        |        |        |       |        |       |        |
| Median (n=8)                     | 99.22  | 91.80  | 85.53  | 56.18 | 56.26  | 74.67 | 30.45  |
| Max                              | 102.38 | 126.70 | 88.88  | 78.19 | 70.69  | 80.99 | 40.50  |
| Min                              | 92.59  | 80.38  | 75.78  | 43.89 | 42.03  | 57.38 | 22.60  |
| <b>AMP 0.25+CLI 0.04+VAN 0.4</b> |        |        |        |       |        |       |        |
| Median (n=8)                     | 96.19  | 106.46 | 99.60  | 74.96 | 44.95  | 87.67 | -5.15  |
| Max                              | 103.71 | 111.15 | 123.10 | 86.29 | 124.37 | 98.28 | 13.39  |
| Min                              | 91.41  | 96.85  | 94.45  | 62.59 | 2.86   | 77.72 | -11.96 |
| <b>AMP 0.25+CLI 0.04+STR 2.5</b> |        |        |        |       |        |       |        |
| Median (n=8)                     | 96.19  | 106.46 | 85.53  | 74.96 | 62.55  | 8.36  | -9.88  |
| Max                              | 103.71 | 111.15 | 88.88  | 86.29 | 94.99  | 94.49 | -6.62  |
| Min                              | 91.41  | 96.85  | 75.78  | 62.59 | 47.67  | -6.91 | -34.88 |
| <b>AMP 0.25+ERY 0.07+VAN 0.4</b> |        |        |        |       |        |       |        |
| Median (n=16)                    | 96.19  | 78.10  | 99.60  | 70.30 | 44.95  | 13.57 | -8.97  |
| Max                              | 103.71 | 125.01 | 123.10 | 77.13 | 124.37 | 91.37 | 19.74  |
| Min                              | 91.41  | 68.65  | 94.45  | 64.36 | 2.86   | -0.69 | -11.57 |
| <b>AMP 0.25+ERY 0.07+STR 2.5</b> |        |        |        |       |        |       |        |
| Median (n=16)                    | 96.19  | 78.10  | 85.53  | 70.30 | 62.55  | 61.11 | 27.06  |



|                           |        |        |        |        |        |        |       |
|---------------------------|--------|--------|--------|--------|--------|--------|-------|
| Max                       | 103.71 | 125.01 | 88.88  | 77.13  | 94.99  | 78.69  | 43.48 |
| Min                       | 91.41  | 68.65  | 75.78  | 64.36  | 47.67  | 44.45  | 5.14  |
| AMP 0.25+STR 2.5+VAN 0.4  |        |        |        |        |        |        |       |
| Median (n=8)              | 96.19  | 85.53  | 99.60  | 62.55  | 44.95  | 63.50  | -5.62 |
| Max                       | 103.71 | 88.88  | 123.10 | 94.99  | 124.37 | 100.61 | 7.22  |
| Min                       | 91.41  | 75.78  | 94.45  | 47.67  | 2.86   | 21.07  | -9.93 |
| DOX 0.9+ERY 0.07+STR 2.5  |        |        |        |        |        |        |       |
| Median (n=16)             | 84.25  | 94.33  | 85.53  | 7.67   | 7.36   | 61.93  | 0.91  |
| Max                       | 94.76  | 117.27 | 88.88  | 87.95  | 78.81  | 90.83  | 10.74 |
| Min                       | 72.51  | 79.10  | 75.78  | -7.69  | -11.02 | 44.37  | -5.15 |
| ERY 0.07+GEN 0.2+STR 2.5  |        |        |        |        |        |        |       |
| Median (n=16)             | 94.33  | 102.73 | 85.53  | 103.35 | 61.93  | 59.83  | 13.33 |
| Max                       | 117.27 | 128.07 | 88.88  | 109.17 | 90.83  | 105.36 | 29.86 |
| Min                       | 79.10  | 95.16  | 75.78  | 92.86  | 44.37  | 47.68  | 3.28  |
| CPR 0.15+ERY 0.07+STR 2.5 |        |        |        |        |        |        |       |
| Median (n=16)             | 91.80  | 94.33  | 85.53  | 73.29  | 74.67  | 61.93  | 61.70 |
| Max                       | 126.70 | 117.27 | 88.88  | 120.70 | 80.99  | 90.83  | 69.14 |
| Min                       | 80.38  | 79.10  | 75.78  | 63.13  | 57.38  | 44.37  | 57.81 |
| DOX 0.9+GEN 0.2+STR 2.5   |        |        |        |        |        |        |       |

|                           |        |        |        |        |        |        |       |
|---------------------------|--------|--------|--------|--------|--------|--------|-------|
| Median (n=16)             | 84.25  | 102.73 | 85.53  | 86.06  | 7.36   | 59.83  | -2.23 |
| Max                       | 94.76  | 128.07 | 88.88  | 113.82 | 78.81  | 105.36 | 12.76 |
| Min                       | 72.51  | 95.16  | 75.78  | 52.18  | -11.02 | 47.68  | -8.27 |
| DOX 0.9+STR 2.5+VAN 0.4   |        |        |        |        |        |        |       |
| Median (n=8)              | 84.25  | 85.53  | 99.60  | 7.36   | 76.38  | 63.50  | -3.56 |
| Max                       | 94.76  | 88.88  | 123.10 | 78.81  | 106.28 | 100.61 | 8.17  |
| Min                       | 72.51  | 75.78  | 94.45  | -11.02 | 63.45  | 21.07  | -6.65 |
| CLI 0.04+DOX 0.9+STR 2.5  |        |        |        |        |        |        |       |
| Median (n=8)              | 106.46 | 84.25  | 85.53  | 34.12  | 8.36   | 7.36   | 5.92  |
| Max                       | 111.15 | 94.76  | 88.88  | 78.06  | 94.49  | 78.81  | 25.07 |
| Min                       | 96.85  | 72.51  | 75.78  | 21.22  | -6.91  | -11.02 | 1.33  |
| CLI 0.04+DOX 0.9+ERY 0.07 |        |        |        |        |        |        |       |
| Median (n=16)             | 106.46 | 84.26  | 94.33  | 34.12  | 81.95  | 7.67   | 17.56 |
| Max                       | 111.15 | 94.76  | 117.27 | 78.06  | 113.78 | 87.95  | 29.02 |
| Min                       | 96.85  | 72.51  | 79.10  | 21.22  | 66.47  | -7.69  | 12.11 |
| CLI 0.04+GEN 0.2+STR 2.5  |        |        |        |        |        |        |       |
| Median (n=8)              | 106.46 | 102.73 | 85.53  | 73.76  | 8.36   | 59.83  | 4.87  |
| Max                       | 111.15 | 128.07 | 88.88  | 101.00 | 94.49  | 105.36 | 17.52 |
| Min                       | 96.85  | 95.16  | 75.78  | -0.16  | -6.91  | 47.68  | -1.40 |

|                           |        |        |        |        |        |        |        |
|---------------------------|--------|--------|--------|--------|--------|--------|--------|
| CLI 0.04+CPR 0.15+STR 2.5 |        |        |        |        |        |        |        |
| Median (n=8)              | 106.46 | 91.81  | 85.53  | 78.20  | 8.36   | 74.67  | 27.39  |
| Max                       | 111.15 | 126.70 | 88.88  | 85.92  | 94.49  | 80.99  | 40.08  |
| Min                       | 96.85  | 80.38  | 75.78  | 70.44  | -6.91  | 57.38  | 7.40   |
| DOX 0.9+FOX 0.7+STR 2.5   |        |        |        |        |        |        |        |
| Median (n=16)             | 84.25  | 78.10  | 85.53  | 60.25  | 7.36   | 61.11  | 4.35   |
| Max                       | 94.76  | 125.01 | 88.88  | 67.10  | 78.81  | 78.69  | 15.30  |
| Min                       | 72.51  | 68.65  | 75.78  | 55.61  | -11.02 | 44.45  | -2.55  |
| DOX 0.9+ERY 0.07+FOX 0.7  |        |        |        |        |        |        |        |
| Median (n=16)             | 84.25  | 94.33  | 78.10  | 7.67   | 60.25  | 66.56  | 14.78  |
| Max                       | 94.76  | 117.27 | 125.01 | 87.95  | 67.10  | 71.64  | 25.44  |
| Min                       | 72.51  | 79.10  | 68.65  | -7.69  | 55.61  | 57.85  | 8.76   |
| AMP 0.25+CPR 0.15+VAN 0.4 |        |        |        |        |        |        |        |
| Median (n=8)              | 96.19  | 91.81  | 99.60  | 70.27  | 44.95  | 72.41  | 10.76  |
| Max                       | 103.71 | 126.70 | 123.10 | 108.11 | 124.37 | 121.13 | 17.10  |
| Min                       | 91.41  | 80.38  | 94.45  | 59.24  | 2.86   | 67.69  | 1.33   |
| AMP 0.25+CPR 0.15+STR 2.5 |        |        |        |        |        |        |        |
| Median (n=16)             | 96.19  | 91.81  | 85.53  | 70.27  | 62.55  | 74.67  | 16.42  |
| Max                       | 103.71 | 126.70 | 88.88  | 108.11 | 94.99  | 80.99  | 112.12 |

|                           |        |        |        |        |        |        |        |
|---------------------------|--------|--------|--------|--------|--------|--------|--------|
| Min                       | 91.41  | 80.38  | 75.78  | 59.24  | 47.67  | 57.38  | 0.25   |
| AMP 0.25+FUS 0.02+VAN 0.4 |        |        |        |        |        |        |        |
| Median (n=16)             | 96.19  | 94.12  | 99.60  | 83.58  | 44.95  | 86.16  | 9.41   |
| Max                       | 103.71 | 107.80 | 123.10 | 101.66 | 124.37 | 104.11 | 35.97  |
| Min                       | 91.41  | 82.11  | 94.45  | 74.06  | 2.86   | 78.85  | -5.51  |
| AMP 0.25+FUS 0.02+STR 2.5 |        |        |        |        |        |        |        |
| Median (n=16)             | 96.19  | 94.12  | 85.53  | 83.58  | 62.55  | 55.38  | 23.13  |
| Max                       | 103.71 | 107.80 | 88.88  | 101.66 | 94.99  | 103.03 | 44.69  |
| Min                       | 91.41  | 82.11  | 75.78  | 74.06  | 47.67  | 37.01  | 14.39  |
| AMP 0.25+TMP 5+VAN 0.4    |        |        |        |        |        |        |        |
| Median (n=8)              | 96.19  | 86.60  | 99.60  | 83.21  | 44.95  | 84.53  | 11.50  |
| Max                       | 103.71 | 99.83  | 123.10 | 88.36  | 124.37 | 97.10  | 53.64  |
| Min                       | 91.41  | 73.41  | 94.45  | 78.31  | 2.86   | 79.82  | -6.23  |
| AMP 0.25+STR 2.5+TMP 5    |        |        |        |        |        |        |        |
| Median (n=8)              | 96.19  | 85.53  | 86.60  | 62.55  | 83.21  | 72.49  | 79.02  |
| Max                       | 103.71 | 88.88  | 99.83  | 94.99  | 88.36  | 134.21 | 103.76 |
| Min                       | 91.41  | 75.78  | 73.41  | 47.67  | 78.31  | 65.03  | 50.25  |
| GEN 0.2+STR 2.5+TMP 5     |        |        |        |        |        |        |        |
| Median (n=8)              | 102.73 | 85.53  | 86.60  | 59.83  | 75.09  | 72.49  | 77.90  |

|                          |        |        |       |        |        |        |       |
|--------------------------|--------|--------|-------|--------|--------|--------|-------|
| Max                      | 128.07 | 88.88  | 99.83 | 105.36 | 86.05  | 134.21 | 85.80 |
| Min                      | 95.16  | 75.78  | 73.41 | 47.68  | 67.25  | 65.03  | 65.98 |
| DOX 0.9+STR 2.5+TMP 5    |        |        |       |        |        |        |       |
| Median (n=8)             | 84.25  | 85.53  | 86.60 | 61.33  | 7.36   | 72.49  | 21.14 |
| Max                      | 94.76  | 88.88  | 99.83 | 72.45  | 78.81  | 134.21 | 25.04 |
| Min                      | 72.51  | 75.78  | 73.41 | 56.34  | -11.02 | 65.03  | 11.68 |
| DOX 0.9+ERY 0.07+TMP 5   |        |        |       |        |        |        |       |
| Median (n=16)            | 84.25  | 94.33  | 86.60 | 7.67   | 61.33  | 74.67  | 12.45 |
| Max                      | 94.76  | 117.27 | 99.83 | 87.95  | 72.45  | 81.42  | 19.68 |
| Min                      | 72.51  | 79.10  | 73.41 | -7.69  | 56.34  | 71.53  | 2.18  |
| CPR 0.15+STR 2.5+TMP 5   |        |        |       |        |        |        |       |
| Median (n=8)             | 91.81  | 85.53  | 86.60 | 74.67  | 59.55  | 79.69  | 70.24 |
| Max                      | 126.70 | 88.88  | 99.83 | 80.99  | 61.72  | 85.44  | 85.66 |
| Min                      | 80.38  | 75.78  | 73.41 | 57.38  | 57.91  | 66.76  | 63.64 |
| FOX 0.7+GEN 0.2+STR 2.5  |        |        |       |        |        |        |       |
| Median (n=16)            | 78.10  | 102.73 | 85.53 | 84.75  | 61.11  | 59.83  | 44.57 |
| Max                      | 125.01 | 128.07 | 88.88 | 100.95 | 78.69  | 105.36 | 63.83 |
| Min                      | 68.65  | 95.16  | 75.78 | 78.45  | 44.45  | 47.68  | -2.12 |
| CPR 0.15+FOX 0.7+STR 2.5 |        |        |       |        |        |        |       |

|                           |        |        |        |       |        |        |       |
|---------------------------|--------|--------|--------|-------|--------|--------|-------|
| Median (n=16)             | 91.81  | 78.10  | 85.53  | 56.15 | 74.67  | 61.11  | 52.87 |
| Max                       | 126.70 | 125.01 | 88.88  | 61.36 | 80.99  | 78.69  | 76.51 |
| Min                       | 80.38  | 68.65  | 75.78  | 52.37 | 57.38  | 44.45  | 33.93 |
| DOX 0.9+ERY 0.07+GEN 0.2  |        |        |        |       |        |        |       |
| Median (n=16)             | 84.25  | 94.33  | 102.73 | 7.67  | 86.06  | 103.35 | 17.58 |
| Max                       | 94.76  | 117.27 | 128.07 | 87.95 | 113.82 | 109.17 | 28.70 |
| Min                       | 72.51  | 79.10  | 95.16  | -7.69 | 52.18  | 92.86  | 12.64 |
| CPR 0.15+DOX 0.9+STR 2.5  |        |        |        |       |        |        |       |
| Median (n=16)             | 91.81  | 84.25  | 85.53  | 76.87 | 74.67  | 7.36   | 12.17 |
| Max                       | 126.70 | 94.76  | 88.88  | 91.17 | 80.99  | 78.81  | 60.89 |
| Min                       | 80.38  | 72.51  | 75.78  | 67.23 | 57.38  | -11.02 | -7.50 |
| CPR 0.15+DOX 0.9+ERY 0.07 |        |        |        |       |        |        |       |
| Median (n=16)             | 91.81  | 84.25  | 94.33  | 76.87 | 73.29  | 7.67   | 33.67 |
| Max                       | 126.70 | 94.76  | 117.27 | 91.17 | 120.70 | 87.95  | 94.31 |
| Min                       | 80.38  | 72.51  | 79.10  | 67.23 | 63.13  | -7.69  | 28.37 |
| DOX 0.9+FUS 0.02+STR 2.5  |        |        |        |       |        |        |       |
| Median (n=16)             | 84.25  | 94.12  | 85.53  | 34.19 | 7.36   | 34.19  | 14.85 |
| Max                       | 94.76  | 107.80 | 88.88  | 49.15 | 78.81  | 49.15  | 19.46 |
| Min                       | 72.51  | 82.11  | 75.78  | 25.03 | -11.02 | 25.03  | 6.09  |

|                           |        |        |        |        |        |        |        |
|---------------------------|--------|--------|--------|--------|--------|--------|--------|
| DOX 0.9+ERY 0.07+FUS 0.02 |        |        |        |        |        |        |        |
| Median (n=16)             | 84.25  | 94.33  | 94.12  | 7.67   | 34.19  | 48.14  | 13.50  |
| Max                       | 94.76  | 117.27 | 107.80 | 87.95  | 49.15  | 63.49  | 27.47  |
| Min                       | 72.51  | 79.10  | 82.11  | -7.69  | 25.03  | 31.10  | 8.56   |
| AMP 0.25+DOX 0.9+VAN 0.4  |        |        |        |        |        |        |        |
| Median (n=8)              | 96.19  | 84.25  | 99.60  | 52.95  | 44.95  | 76.38  | 8.80   |
| Max                       | 103.71 | 94.76  | 123.10 | 109.43 | 124.37 | 106.28 | 100.10 |
| Min                       | 91.41  | 72.51  | 94.45  | 40.26  | 2.86   | 63.45  | -3.60  |
| AMP 0.25+GEN 0.2+VAN 0.4  |        |        |        |        |        |        |        |
| Median (n=8)              | 96.19  | 102.73 | 99.60  | 100.76 | 44.95  | 92.85  | 61.90  |
| Max                       | 103.71 | 128.07 | 123.10 | 110.97 | 124.37 | 114.28 | 86.62  |
| Min                       | 91.41  | 95.16  | 94.45  | 95.72  | 2.86   | 81.87  | 13.85  |
| AMP 0.3+TOB 0.2+VAN 0.5   |        |        |        |        |        |        |        |
| Median (n=8)              | 96.19  | 105.58 | 99.60  | 100.04 | 44.95  | 99.17  | 50.55  |
| Max                       | 103.71 | 120.42 | 123.10 | 107.78 | 124.37 | 125.65 | 111.16 |
| Min                       | 91.41  | 100.20 | 94.45  | 98.39  | 2.86   | 92.28  | 26.71  |
| AMP 0.3+STR 2.8+TOB 0.2   |        |        |        |        |        |        |        |
| Median (n=8)              | 96.19  | 85.53  | 105.58 | 62.55  | 100.04 | 47.05  | 25.74  |
| Max                       | 103.71 | 88.88  | 120.42 | 94.99  | 107.78 | 71.87  | 132.86 |

|                          |        |        |        |        |        |        |        |
|--------------------------|--------|--------|--------|--------|--------|--------|--------|
| Min                      | 91.41  | 75.78  | 100.20 | 47.67  | 98.39  | 39.96  | 9.86   |
| GEN 0.25+STR 2.8+TOB 0.2 |        |        |        |        |        |        |        |
| Median (n=8)             | 102.73 | 85.53  | 105.58 | 59.83  | 90.97  | 47.05  | 30.16  |
| Max                      | 128.07 | 88.88  | 120.42 | 105.36 | 100.32 | 71.87  | 41.68  |
| Min                      | 95.16  | 75.78  | 100.20 | 47.68  | 79.00  | 39.96  | 24.66  |
| DOX 1+STR 2.8+TOB 0.2    |        |        |        |        |        |        |        |
| Median (n=8)             | 84.25  | 85.53  | 105.58 | 7.36   | 80.20  | 47.05  | 11.81  |
| Max                      | 94.76  | 88.88  | 120.42 | 78.81  | 86.86  | 71.87  | 126.01 |
| Min                      | 72.51  | 75.78  | 100.20 | -11.02 | 64.44  | 39.96  | 3.62   |
| DOX 1+ERY 0.08+TOB 0.2   |        |        |        |        |        |        |        |
| Median (n=16)            | 84.25  | 94.33  | 105.58 | 7.67   | 80.20  | 96.39  | 20.66  |
| Max                      | 94.76  | 117.27 | 120.42 | 87.95  | 86.86  | 100.63 | 88.05  |
| Min                      | 72.51  | 79.10  | 100.20 | -7.69  | 64.44  | 91.48  | 12.30  |
| CPR 0.2+STR 2.8+TOB 0.2  |        |        |        |        |        |        |        |
| Median (n=8)             | 91.81  | 105.58 | 85.53  | 74.67  | 79.67  | 47.05  | 31.74  |
| Max                      | 126.70 | 120.42 | 88.88  | 80.99  | 83.27  | 71.87  | 50.34  |
| Min                      | 80.38  | 100.20 | 75.78  | 57.38  | 74.63  | 39.96  | -24.06 |
| FUS 0.02+GEN 0.2+STR 2.5 |        |        |        |        |        |        |        |
| Median (n=16)            | 94.12  | 102.73 | 85.53  | 85.56  | 55.38  | 59.83  | 6.40   |



|                                   |        |        |        |        |        |        |        |
|-----------------------------------|--------|--------|--------|--------|--------|--------|--------|
| Max                               | 107.80 | 128.07 | 88.88  | 97.66  | 103.03 | 105.36 | 20.07  |
| Min                               | 82.11  | 95.16  | 75.78  | 58.83  | 37.01  | 47.68  | -34.07 |
| <b>CPR 0.15+FUS 0.02 +STR 2.5</b> |        |        |        |        |        |        |        |
| Median (n=16)                     | 91.80  | 94.12  | 85.53  | 78.98  | 74.67  | 55.38  | 49.55  |
| Max                               | 126.70 | 107.80 | 88.88  | 86.48  | 80.99  | 103.03 | 131.18 |
| Min                               | 80.38  | 82.11  | 75.78  | 74.43  | 57.38  | 37.01  | 34.82  |
| <b>GEN 0.2+STR 2.5+VAN 0.4</b>    |        |        |        |        |        |        |        |
| Median (n=8)                      | 102.73 | 85.53  | 99.60  | 59.83  | 92.85  | 63.50  | 29.35  |
| Max                               | 128.07 | 88.88  | 123.10 | 105.36 | 114.28 | 100.61 | 57.13  |
| Min                               | 95.16  | 75.78  | 94.45  | 47.68  | 81.87  | 21.07  | 7.87   |
| <b>DOX 0.9+ERY 0.07+VAN 0.4</b>   |        |        |        |        |        |        |        |
| Median (n=17)                     | 84.25  | 94.33  | 99.60  | 7.67   | 76.38  | 101.47 | 22.48  |
| Max                               | 94.76  | 117.27 | 123.10 | 87.95  | 106.28 | 117.56 | 91.90  |
| Min                               | 72.51  | 79.10  | 94.45  | -7.69  | 63.45  | 89.18  | 8.09   |
| <b><i>E. coli</i> CFT073</b>      |        |        |        |        |        |        |        |
| <b>AMP 3.56+CHL 88.4+CLI 13.3</b> |        |        |        |        |        |        |        |
| Median (n=32)                     | 79.51  | 79.93  | 85.73  | 41.62  | 56.99  | 64.60  | 36.88  |
| Max                               | 98.05  | 89.78  | 93.78  | 49.28  | 63.88  | 70.79  | 46.18  |

|                               |       |       |        |       |       |       |       |
|-------------------------------|-------|-------|--------|-------|-------|-------|-------|
| Min                           | 64.70 | 76.34 | 82.45  | 31.78 | 28.94 | 62.23 | 31.65 |
| AMP 3.56+CHL 88.4+CPR 0.04    |       |       |        |       |       |       |       |
| Median (n=32)                 | 79.51 | 79.93 | 68.75  | 41.62 | 42.37 | 59.26 | 32.90 |
| Max                           | 98.05 | 89.78 | 81.60  | 49.28 | 51.22 | 66.26 | 34.96 |
| Min                           | 64.70 | 76.34 | 61.44  | 31.78 | 34.59 | 50.17 | 26.25 |
| AMP 3.56+CHL 88.4+DOX<br>0.66 |       |       |        |       |       |       |       |
| Median (n=32)                 | 79.51 | 79.93 | 66.74  | 41.62 | 23.32 | 53.28 | 7.29  |
| Max                           | 98.05 | 89.78 | 74.60  | 49.28 | 33.73 | 58.97 | 11.22 |
| Min                           | 64.70 | 76.34 | 59.94  | 31.78 | 19.49 | 46.10 | 3.61  |
| AMP 3.56+CHL 88.4+ERY<br>3.62 |       |       |        |       |       |       |       |
| Median (n=32)                 | 79.51 | 79.93 | 102.45 | 41.62 | 74.31 | 88.74 | 43.26 |
| Max                           | 98.05 | 89.78 | 112.12 | 49.28 | 80.19 | 99.59 | 53.49 |
| Min                           | 64.70 | 76.34 | 92.26  | 31.78 | 61.29 | 83.72 | 27.67 |
| AMP 3.56+CHL 88.4+FOX<br>2.25 |       |       |        |       |       |       |       |
| Median (n=32)                 | 79.51 | 79.93 | 80.36  | 41.62 | 8.33  | 31.79 | 3.77  |
| Max                           | 98.05 | 89.78 | 94.71  | 49.28 | 25.57 | 45.60 | 20.28 |
| Min                           | 64.70 | 76.34 | 35.04  | 31.78 | 3.56  | 18.40 | 0.13  |

|                               |       |       |        |       |       |       |       |
|-------------------------------|-------|-------|--------|-------|-------|-------|-------|
| AMP 3.56+CHL 88.4+FUS 38      |       |       |        |       |       |       |       |
| Median (n=32)                 | 79.51 | 79.93 | 68.42  | 41.62 | 23.62 | 48.88 | 3.47  |
| Max                           | 98.05 | 89.78 | 95.37  | 49.28 | 47.35 | 52.19 | 22.09 |
| Min                           | 64.70 | 76.34 | 32.92  | 31.78 | -7.95 | 44.28 | -0.19 |
| AMP 3.56+CHL 88.4+GEN 4.4     |       |       |        |       |       |       |       |
| Median (n=32)                 | 79.51 | 79.93 | 73.83  | 41.62 | 50.59 | 66.50 | 34.46 |
| Max                           | 98.05 | 89.78 | 86.03  | 49.28 | 60.20 | 69.73 | 36.58 |
| Min                           | 64.70 | 76.34 | 60.41  | 31.78 | 15.88 | 38.56 | 29.39 |
| AMP 3.56+CHL 88.4+NTR<br>16.5 |       |       |        |       |       |       |       |
| Median (n=32)                 | 79.51 | 79.93 | 77.44  | 41.62 | 48.96 | 63.48 | 42.91 |
| Max                           | 98.05 | 89.78 | 103.36 | 49.28 | 55.06 | 69.02 | 51.87 |
| Min                           | 64.70 | 76.34 | 64.31  | 31.78 | 44.84 | 61.83 | 37.83 |
| AMP 3.56+CHL 88.4+STR 8.47    |       |       |        |       |       |       |       |
| Median (n=32)                 | 79.51 | 79.93 | 57.18  | 41.62 | 23.08 | 57.68 | 18.44 |
| Max                           | 98.05 | 89.78 | 77.02  | 49.28 | 34.32 | 65.61 | 22.50 |
| Min                           | 64.70 | 76.34 | 42.55  | 31.78 | 18.49 | 44.75 | 15.21 |
| AMP 3.56+CHL 88.4+TMP<br>0.35 |       |       |        |       |       |       |       |

|                               |       |        |       |       |        |       |       |
|-------------------------------|-------|--------|-------|-------|--------|-------|-------|
| Median (n=32)                 | 79.51 | 79.93  | 80.68 | 41.62 | 89.39  | 64.13 | 63.95 |
| Max                           | 98.05 | 89.78  | 95.28 | 49.28 | 107.54 | 70.64 | 74.61 |
| Min                           | 64.70 | 76.34  | 69.35 | 31.78 | 87.48  | 55.75 | 61.34 |
| AMP 3.56+CHL 88.4+TOB 4.1     |       |        |       |       |        |       |       |
| Median (n=32)                 | 79.51 | 79.93  | 71.10 | 41.62 | 47.33  | 73.13 | 32.60 |
| Max                           | 98.05 | 89.78  | 84.19 | 49.28 | 50.75  | 90.95 | 36.77 |
| Min                           | 64.70 | 76.34  | 24.81 | 31.78 | 38.11  | 41.54 | 29.92 |
| AMP 3.56+CHL 88.4+VAN 80      |       |        |       |       |        |       |       |
| Median (n=32)                 | 79.51 | 79.93  | 55.55 | 41.62 | 9.58   | 56.42 | 12.87 |
| Max                           | 98.05 | 89.78  | 69.28 | 49.28 | 32.33  | 64.37 | 18.26 |
| Min                           | 64.70 | 76.34  | 22.28 | 31.78 | -5.26  | 38.52 | 5.48  |
| AMP 3.56+NTR 16.5+STR 8.47    |       |        |       |       |        |       |       |
| Median (n=32)                 | 79.51 | 77.44  | 57.18 | 48.96 | 23.08  | -1.04 | -1.08 |
| Max                           | 98.05 | 103.36 | 77.02 | 55.06 | 34.32  | 6.07  | 12.92 |
| Min                           | 64.70 | 64.31  | 42.55 | 44.84 | 18.49  | -5.76 | -6.65 |
| AMP 3.56+NTR 16.5+TMP<br>0.35 |       |        |       |       |        |       |       |
| Median (n=32)                 | 79.51 | 77.44  | 80.68 | 48.96 | 89.39  | 59.58 | 45.98 |
| Max                           | 98.05 | 103.36 | 95.28 | 55.06 | 107.54 | 76.21 | 51.32 |

|                            |       |        |        |       |       |       |        |
|----------------------------|-------|--------|--------|-------|-------|-------|--------|
| Min                        | 64.70 | 64.31  | 69.35  | 44.84 | 87.48 | 39.33 | 20.27  |
| AMP 3.56+NTR 16.5+TOB 4.1  |       |        |        |       |       |       |        |
| Median (n=32)              | 79.51 | 77.44  | 71.10  | 48.96 | 47.33 | 62.07 | 22.69  |
| Max                        | 98.05 | 103.36 | 84.19  | 55.06 | 50.75 | 71.72 | 25.39  |
| Min                        | 64.70 | 64.31  | 24.81  | 44.84 | 38.11 | 52.22 | 16.88  |
| AMP 3.56+NTR 16.5+VAN 80   |       |        |        |       |       |       |        |
| Median (n=32)              | 79.51 | 77.44  | 55.55  | 48.96 | 9.58  | 4.46  | 0.04   |
| Max                        | 98.05 | 103.36 | 69.28  | 55.06 | 32.33 | 7.53  | 37.12  |
| Min                        | 64.70 | 64.31  | 22.28  | 44.84 | -5.26 | 1.83  | -1.92  |
| AMP 3.56+CLI 13.3+CPR 0.04 |       |        |        |       |       |       |        |
| Median (n=32)              | 79.51 | 85.73  | 68.75  | 56.99 | 42.37 | 48.51 | 26.73  |
| Max                        | 98.05 | 93.78  | 81.60  | 63.88 | 51.22 | 55.00 | 37.17  |
| Min                        | 64.70 | 82.45  | 61.44  | 28.94 | 34.59 | 45.35 | -17.55 |
| AMP 3.56+CLI 13.3+DOX 0.66 |       |        |        |       |       |       |        |
| Median (n=32)              | 79.51 | 85.73  | 66.74  | 56.99 | 23.32 | 55.62 | 37.45  |
| Max                        | 98.05 | 93.78  | 74.60  | 63.88 | 33.73 | 57.88 | 42.93  |
| Min                        | 64.70 | 82.45  | 59.94  | 28.94 | 19.49 | 33.60 | 27.55  |
| AMP 3.56+CLI 13.3+ERY 3.62 |       |        |        |       |       |       |        |
| Median (n=32)              | 79.51 | 85.73  | 102.45 | 56.99 | 74.31 | 80.27 | 53.97  |

|                            |       |       |        |       |       |       |       |
|----------------------------|-------|-------|--------|-------|-------|-------|-------|
| Max                        | 98.05 | 93.78 | 112.12 | 63.88 | 80.19 | 84.78 | 80.58 |
| Min                        | 64.70 | 82.45 | 92.26  | 28.94 | 61.29 | 74.41 | 42.29 |
| AMP 3.56+CLI 13.3+FOX 2.25 |       |       |        |       |       |       |       |
| Median (n=32)              | 79.51 | 85.73 | 80.36  | 56.99 | 8.33  | 55.83 | 8.21  |
| Max                        | 98.05 | 93.78 | 94.71  | 63.88 | 25.57 | 65.15 | 10.34 |
| Min                        | 64.70 | 82.45 | 35.04  | 28.94 | 3.56  | 34.19 | -1.23 |
| AMP 3.56+CLI 13.3+FUS 38   |       |       |        |       |       |       |       |
| Median (n=32)              | 79.51 | 85.73 | 68.42  | 56.99 | 23.62 | 52.71 | 30.43 |
| Max                        | 98.05 | 93.78 | 95.37  | 63.88 | 47.35 | 58.40 | 44.20 |
| Min                        | 64.70 | 82.45 | 32.92  | 28.94 | -7.95 | 49.34 | 25.59 |
| AMP 3.56+CLI 13.3+GEN 4.4  |       |       |        |       |       |       |       |
| Median (n=32)              | 79.51 | 85.73 | 73.83  | 56.99 | 50.59 | 52.38 | 38.23 |
| Max                        | 98.05 | 93.78 | 86.03  | 63.88 | 60.20 | 62.10 | 43.86 |
| Min                        | 64.70 | 82.45 | 60.41  | 28.94 | 15.88 | 38.88 | 29.55 |
| AMP 3.56+CLI 13.3+NTR 16.5 |       |       |        |       |       |       |       |
| Median (n=32)              | 79.51 | 85.73 | 77.44  | 56.99 | 48.96 | 65.25 | 47.77 |
| Max                        | 98.05 | 93.78 | 103.36 | 63.88 | 55.06 | 82.74 | 54.45 |
| Min                        | 64.70 | 82.45 | 64.31  | 28.94 | 44.84 | 34.35 | 37.01 |
| AMP 3.56+CLI 13.3+STR 8.47 |       |       |        |       |       |       |       |

|                            |       |       |       |       |        |       |       |
|----------------------------|-------|-------|-------|-------|--------|-------|-------|
| Median (n=32)              | 79.51 | 85.73 | 57.18 | 56.99 | 23.08  | 50.17 | 17.22 |
| Max                        | 98.05 | 93.78 | 77.02 | 63.88 | 34.32  | 66.01 | 25.66 |
| Min                        | 64.70 | 82.45 | 42.55 | 28.94 | 18.49  | 28.12 | 10.39 |
| AMP 3.56+CLI 13.3+TMP 0.35 |       |       |       |       |        |       |       |
| Median (n=32)              | 79.51 | 85.73 | 80.68 | 56.99 | 89.39  | 65.29 | 53.09 |
| Max                        | 98.05 | 93.78 | 95.28 | 63.88 | 107.54 | 76.70 | 58.22 |
| Min                        | 64.70 | 82.45 | 69.35 | 28.94 | 87.48  | 51.25 | 29.64 |
| AMP 3.56+CLI 13.3+TOB 4.1  |       |       |       |       |        |       |       |
| Median (n=32)              | 79.51 | 85.73 | 71.10 | 56.99 | 47.33  | 64.55 | 31.03 |
| Max                        | 98.05 | 93.78 | 84.19 | 63.88 | 50.75  | 70.55 | 39.02 |
| Min                        | 64.70 | 82.45 | 24.81 | 28.94 | 38.11  | 42.49 | 25.54 |
| AMP 3.56+CLI 13.3+VAN 80   |       |       |       |       |        |       |       |
| Median (n=32)              | 79.51 | 85.73 | 55.55 | 56.99 | 9.58   | 54.43 | 12.52 |
| Max                        | 98.05 | 93.78 | 69.28 | 63.88 | 32.33  | 62.33 | 19.18 |
| Min                        | 64.70 | 82.45 | 22.28 | 28.94 | -5.26  | 10.37 | 4.66  |
| AMP 3.56+STR 8.47+TMP 0.35 |       |       |       |       |        |       |       |
| Median (n=32)              | 79.51 | 57.18 | 80.68 | 23.08 | 89.39  | 46.20 | 43.52 |
| Max                        | 98.05 | 77.02 | 95.28 | 34.32 | 107.54 | 59.14 | 53.39 |
| Min                        | 64.70 | 42.55 | 69.35 | 18.49 | 87.48  | 39.27 | 18.79 |

|                               |       |       |        |       |       |       |       |
|-------------------------------|-------|-------|--------|-------|-------|-------|-------|
| AMP 3.56+STR 8.47+TOB 4.1     |       |       |        |       |       |       |       |
| Median (n=32)                 | 79.51 | 57.18 | 71.10  | 23.08 | 47.33 | 56.45 | 13.50 |
| Max                           | 98.05 | 77.02 | 84.19  | 34.32 | 50.75 | 65.02 | 33.13 |
| Min                           | 64.70 | 42.55 | 24.81  | 18.49 | 38.11 | 50.40 | 0.50  |
| AMP 3.56+STR 8.47+VAN 80      |       |       |        |       |       |       |       |
| Median (n=32)                 | 79.51 | 57.18 | 55.55  | 23.08 | 9.58  | 35.57 | 3.25  |
| Max                           | 98.05 | 77.02 | 69.28  | 34.32 | 32.33 | 39.85 | 12.62 |
| Min                           | 64.70 | 42.55 | 22.28  | 18.49 | -5.26 | 10.50 | -0.14 |
| AMP 3.56+CPR 0.04+DOX<br>0.66 |       |       |        |       |       |       |       |
| Median (n=32)                 | 79.51 | 68.75 | 66.74  | 42.37 | 23.32 | 40.45 | 28.82 |
| Max                           | 98.05 | 81.60 | 74.60  | 51.22 | 33.73 | 47.06 | 39.31 |
| Min                           | 64.70 | 61.44 | 59.94  | 34.59 | 19.49 | 25.69 | 19.60 |
| AMP 3.56+CPR 0.04+ERY 3.62    |       |       |        |       |       |       |       |
| Median (n=32)                 | 79.51 | 68.75 | 102.45 | 42.37 | 74.31 | 63.47 | 36.38 |
| Max                           | 98.05 | 81.60 | 112.12 | 51.22 | 80.19 | 70.41 | 55.62 |
| Min                           | 64.70 | 61.44 | 92.26  | 34.59 | 61.29 | 59.44 | 7.77  |
| AMP 3.56+CPR 0.04+FOX 2.25    |       |       |        |       |       |       |       |
| Median (n=32)                 | 79.51 | 68.75 | 80.36  | 42.37 | 8.33  | 28.68 | 15.28 |



|                            |       |       |        |       |       |       |       |
|----------------------------|-------|-------|--------|-------|-------|-------|-------|
| Max                        | 98.05 | 81.60 | 94.71  | 51.22 | 25.57 | 35.14 | 20.42 |
| Min                        | 64.70 | 61.44 | 35.04  | 34.59 | 3.56  | 23.57 | 6.53  |
| AMP 3.56+CPR 0.04+FUS 38   |       |       |        |       |       |       |       |
| Median (n=32)              | 79.51 | 68.75 | 68.42  | 42.37 | 23.62 | 61.41 | 20.84 |
| Max                        | 98.05 | 81.60 | 95.37  | 51.22 | 47.35 | 63.42 | 24.40 |
| Min                        | 64.70 | 61.44 | 32.92  | 34.59 | -7.95 | 55.16 | 15.12 |
| AMP 3.56+CPR 0.04+GEN 4.4  |       |       |        |       |       |       |       |
| Median (n=32)              | 79.51 | 68.75 | 73.83  | 42.37 | 50.59 | 43.85 | 20.60 |
| Max                        | 98.05 | 81.60 | 86.03  | 51.22 | 60.20 | 55.82 | 23.83 |
| Min                        | 64.70 | 61.44 | 60.41  | 34.59 | 15.88 | 40.21 | 10.32 |
| AMP 3.56+CPR 0.04+NTR 16.5 |       |       |        |       |       |       |       |
| Median (n=32)              | 79.51 | 68.75 | 77.44  | 42.37 | 48.96 | 40.46 | 20.60 |
| Max                        | 98.05 | 81.60 | 103.36 | 51.22 | 55.06 | 47.50 | 35.81 |
| Min                        | 64.70 | 61.44 | 64.31  | 34.59 | 44.84 | 34.96 | 17.15 |
| AMP 3.56+CPR 0.04+STR 8.47 |       |       |        |       |       |       |       |
| Median (n=32)              | 79.51 | 68.75 | 57.18  | 42.37 | 23.08 | 46.40 | 19.17 |
| Max                        | 98.05 | 81.60 | 77.02  | 51.22 | 34.32 | 50.59 | 27.10 |
| Min                        | 64.70 | 61.44 | 42.55  | 34.59 | 18.49 | 32.43 | 15.36 |
| AMP 3.56+CPR 0.04+TMP      |       |       |        |       |       |       |       |

|                           |       |       |       |        |        |       |       |
|---------------------------|-------|-------|-------|--------|--------|-------|-------|
| 0.35                      |       |       |       |        |        |       |       |
| Median (n=32)             | 79.51 | 68.75 | 80.68 | 42.37  | 89.39  | 38.56 | 37.04 |
| Max                       | 98.05 | 81.60 | 95.28 | 51.22  | 107.54 | 50.13 | 48.04 |
| Min                       | 64.70 | 61.44 | 69.35 | 34.59  | 87.48  | 7.17  | 30.23 |
| AMP 3.56+CPR 0.04+TOB 4.1 |       |       |       |        |        |       |       |
| Median (n=32)             | 79.51 | 68.75 | 71.10 | 42.37  | 47.33  | 56.65 | 24.74 |
| Max                       | 98.05 | 81.60 | 84.19 | 51.22  | 50.75  | 59.64 | 34.63 |
| Min                       | 64.70 | 61.44 | 24.81 | 34.59  | 38.11  | 7.91  | 11.65 |
| AMP 3.56+CPR 0.04+VAN 80  |       |       |       |        |        |       |       |
| Median (n=32)             | 79.51 | 68.75 | 55.55 | 42.37  | 9.58   | 27.31 | 11.80 |
| Max                       | 98.05 | 81.60 | 69.28 | 51.22  | 32.33  | 35.95 | 22.37 |
| Min                       | 64.70 | 61.44 | 22.28 | 34.59  | -5.26  | 7.10  | -0.38 |
| AMP 3.56+TMP 0.35+TOB 4.1 |       |       |       |        |        |       |       |
| Median (n=32)             | 79.51 | 80.68 | 71.10 | 89.39  | 47.33  | 49.81 | 51.01 |
| Max                       | 98.05 | 95.28 | 84.19 | 107.54 | 50.75  | 65.61 | 60.42 |
| Min                       | 64.70 | 69.35 | 24.81 | 87.48  | 38.11  | 10.01 | 42.23 |
| AMP 3.56+TMP 0.35+VAN 80  |       |       |       |        |        |       |       |
| Median (n=32)             | 79.51 | 80.68 | 55.55 | 89.39  | 9.58   | 32.45 | 24.40 |
| Max                       | 98.05 | 95.28 | 69.28 | 107.54 | 32.33  | 69.49 | 31.04 |

|                               |       |       |        |       |       |       |       |
|-------------------------------|-------|-------|--------|-------|-------|-------|-------|
| Min                           | 64.70 | 69.35 | 22.28  | 87.48 | -5.26 | 23.81 | 18.51 |
| AMP 3.56+DOX 0.66+ERY<br>3.62 |       |       |        |       |       |       |       |
| Median (n=32)                 | 79.51 | 66.74 | 102.45 | 23.32 | 74.31 | 38.07 | 22.70 |
| Max                           | 98.05 | 74.60 | 112.12 | 33.73 | 80.19 | 53.96 | 37.06 |
| Min                           | 64.70 | 59.94 | 92.26  | 19.49 | 61.29 | 32.72 | 12.79 |
| AMP 3.56+DOX 0.66+FOX<br>2.25 |       |       |        |       |       |       |       |
| Median (n=32)                 | 79.51 | 66.74 | 80.36  | 23.32 | 8.33  | 14.61 | -0.63 |
| Max                           | 98.05 | 74.60 | 94.71  | 33.73 | 25.57 | 22.40 | 16.23 |
| Min                           | 64.70 | 59.94 | 35.04  | 19.49 | 3.56  | 3.46  | -4.53 |
| AMP 3.56+DOX 0.66+FUS 38      |       |       |        |       |       |       |       |
| Median (n=32)                 | 79.51 | 66.74 | 68.42  | 23.32 | 23.62 | 21.11 | 5.78  |
| Max                           | 98.05 | 74.60 | 95.37  | 33.73 | 47.35 | 27.77 | 14.04 |
| Min                           | 64.70 | 59.94 | 32.92  | 19.49 | -7.95 | 4.66  | 2.80  |
| AMP 3.56+DOX 0.66+GEN 4.4     |       |       |        |       |       |       |       |
| Median (n=32)                 | 79.51 | 66.74 | 73.83  | 23.32 | 50.59 | 47.29 | 9.29  |
| Max                           | 98.05 | 74.60 | 86.03  | 33.73 | 60.20 | 52.81 | 18.43 |
| Min                           | 64.70 | 59.94 | 60.41  | 19.49 | 15.88 | 42.22 | 4.84  |

|                               |       |       |        |       |        |       |       |
|-------------------------------|-------|-------|--------|-------|--------|-------|-------|
| AMP 3.56+DOX 0.66+NTR<br>16.5 |       |       |        |       |        |       |       |
| Median (n=32)                 | 79.51 | 66.74 | 77.44  | 23.32 | 48.96  | 53.09 | 59.61 |
| Max                           | 98.05 | 74.60 | 103.36 | 33.73 | 55.06  | 57.29 | 68.80 |
| Min                           | 64.70 | 59.94 | 64.31  | 19.49 | 44.84  | 40.44 | 49.38 |
| AMP 3.56+DOX 0.66+STR<br>8.47 |       |       |        |       |        |       |       |
| Median (n=32)                 | 79.51 | 66.74 | 57.18  | 23.32 | 23.08  | 21.72 | 12.26 |
| Max                           | 98.05 | 74.60 | 77.02  | 33.73 | 34.32  | 44.29 | 15.45 |
| Min                           | 64.70 | 59.94 | 42.55  | 19.49 | 18.49  | 6.56  | 2.62  |
| AMP 3.56+DOX 0.66+TMP<br>0.35 |       |       |        |       |        |       |       |
| Median (n=32)                 | 79.51 | 66.74 | 80.68  | 23.32 | 89.39  | 54.35 | 32.48 |
| Max                           | 98.05 | 74.60 | 95.28  | 33.73 | 107.54 | 70.73 | 38.78 |
| Min                           | 64.70 | 59.94 | 69.35  | 19.49 | 87.48  | 30.60 | 22.60 |
| AMP 3.56+DOX 0.66+TOB 4.1     |       |       |        |       |        |       |       |
| Median (n=32)                 | 79.51 | 66.74 | 71.10  | 23.32 | 47.33  | 54.27 | 15.55 |
| Max                           | 98.05 | 74.60 | 84.19  | 33.73 | 50.75  | 58.95 | 30.03 |
| Min                           | 64.70 | 59.94 | 24.81  | 19.49 | 38.11  | 36.63 | 9.30  |
| AMP 3.56+DOX 0.66+VAN 80      |       |       |        |       |        |       |       |

|                               |       |        |       |       |       |        |       |
|-------------------------------|-------|--------|-------|-------|-------|--------|-------|
| Median (n=32)                 | 79.51 | 66.74  | 55.55 | 23.32 | 9.58  | 11.12  | 11.06 |
| Max                           | 98.05 | 74.60  | 69.28 | 33.73 | 32.33 | 18.14  | 15.84 |
| Min                           | 64.70 | 59.94  | 22.28 | 19.49 | -5.26 | -12.51 | 7.58  |
| AMP 3.56+ERY 3.62+FOX<br>2.25 |       |        |       |       |       |        |       |
| Median (n=32)                 | 79.51 | 102.45 | 80.36 | 74.31 | 8.33  | 62.01  | 8.50  |
| Max                           | 98.05 | 112.12 | 94.71 | 80.19 | 25.57 | 71.19  | 59.32 |
| Min                           | 64.70 | 92.26  | 35.04 | 61.29 | 3.56  | 51.25  | -5.11 |
| AMP 3.56+ERY 3.62+FUS 38      |       |        |       |       |       |        |       |
| Median (n=32)                 | 79.51 | 102.45 | 68.42 | 74.31 | 23.62 | 52.31  | 21.28 |
| Max                           | 98.05 | 112.12 | 95.37 | 80.19 | 47.35 | 65.73  | 35.40 |
| Min                           | 64.70 | 92.26  | 32.92 | 61.29 | -7.95 | 36.58  | 1.39  |
| AMP 3.56+ERY 3.62+GEN 4.4     |       |        |       |       |       |        |       |
| Median (n=32)                 | 79.51 | 102.45 | 73.83 | 74.31 | 50.59 | 67.28  | 44.63 |
| Max                           | 98.05 | 112.12 | 86.03 | 80.19 | 60.20 | 78.35  | 46.09 |
| Min                           | 64.70 | 92.26  | 60.41 | 61.29 | 15.88 | 21.17  | 38.20 |
| AMP 3.56+ERY 3.62+NTR<br>16.5 |       |        |       |       |       |        |       |
| Median (n=32)                 | 79.51 | 102.45 | 77.44 | 74.31 | 48.96 | 84.06  | 57.77 |

|                               |       |        |        |       |        |       |       |
|-------------------------------|-------|--------|--------|-------|--------|-------|-------|
| Max                           | 98.05 | 112.12 | 103.36 | 80.19 | 55.06  | 87.25 | 68.03 |
| Min                           | 64.70 | 92.26  | 64.31  | 61.29 | 44.84  | 79.31 | 47.83 |
| AMP 3.56+ERY 3.62+STR 8.47    |       |        |        |       |        |       |       |
| Median (n=32)                 | 79.51 | 102.45 | 57.18  | 74.31 | 23.08  | 55.73 | 24.03 |
| Max                           | 98.05 | 112.12 | 77.02  | 80.19 | 34.32  | 64.57 | 49.30 |
| Min                           | 64.70 | 92.26  | 42.55  | 61.29 | 18.49  | 34.13 | 20.43 |
| AMP 3.56+ERY 3.62+TMP<br>0.35 |       |        |        |       |        |       |       |
| Median (n=32)                 | 79.51 | 102.45 | 80.68  | 74.31 | 89.39  | 80.64 | 85.20 |
| Max                           | 98.05 | 112.12 | 95.28  | 80.19 | 107.54 | 90.64 | 92.23 |
| Min                           | 64.70 | 92.26  | 69.35  | 61.29 | 87.48  | 28.20 | 76.24 |
| AMP 3.56+ERY 3.62+TOB 4.1     |       |        |        |       |        |       |       |
| Median (n=32)                 | 79.51 | 102.45 | 71.10  | 74.31 | 47.33  | 76.22 | 37.67 |
| Max                           | 98.05 | 112.12 | 84.19  | 80.19 | 50.75  | 84.26 | 40.19 |
| Min                           | 64.70 | 92.26  | 24.81  | 61.29 | 38.11  | 69.30 | 22.14 |
| AMP 3.56+ERY 3.62+VAN 80      |       |        |        |       |        |       |       |
| Median (n=32)                 | 79.51 | 102.45 | 55.55  | 74.31 | 9.58   | 71.42 | 25.63 |
| Max                           | 98.05 | 112.12 | 69.28  | 80.19 | 32.33  | 75.27 | 31.55 |
| Min                           | 64.70 | 92.26  | 22.28  | 61.29 | -5.26  | 29.07 | 15.60 |

|                               |       |        |        |       |       |       |       |
|-------------------------------|-------|--------|--------|-------|-------|-------|-------|
| DOX 0.66+ERY 3.62+FOX<br>2.25 |       |        |        |       |       |       |       |
| Median (n=8)                  | 66.74 | 102.45 | 80.36  | 38.07 | 14.61 | 62.01 | 15.76 |
| Max                           | 74.60 | 112.12 | 94.71  | 53.96 | 22.40 | 71.19 | 23.40 |
| Min                           | 59.94 | 92.26  | 35.04  | 32.72 | 3.46  | 51.25 | 11.04 |
| DOX 0.66+ERY 3.62+FUS 38      |       |        |        |       |       |       |       |
| Median (n=16)                 | 66.74 | 102.45 | 68.42  | 38.07 | 21.11 | 52.31 | 12.40 |
| Max                           | 74.60 | 112.12 | 95.37  | 53.96 | 27.77 | 65.73 | 16.48 |
| Min                           | 59.94 | 92.26  | 32.92  | 32.72 | 4.66  | 36.58 | 3.46  |
| DOX 0.66+ERY 3.62+GEN 4.4     |       |        |        |       |       |       |       |
| Median (n=16)                 | 66.74 | 102.45 | 73.83  | 38.07 | 47.29 | 67.28 | 33.31 |
| Max                           | 74.60 | 112.12 | 86.03  | 53.96 | 52.81 | 78.35 | 35.72 |
| Min                           | 59.94 | 92.26  | 60.41  | 32.72 | 42.22 | 21.17 | 26.92 |
| DOX 0.66+ERY 3.62+NTR<br>16.5 |       |        |        |       |       |       |       |
| Median (n=16)                 | 66.74 | 102.45 | 77.44  | 38.07 | 53.09 | 84.06 | 48.06 |
| Max                           | 74.60 | 112.12 | 103.36 | 53.96 | 57.29 | 87.25 | 52.63 |
| Min                           | 59.94 | 92.26  | 64.31  | 32.72 | 40.44 | 79.31 | 38.07 |
| DOX 0.66+ERY 3.62+STR 8.47    |       |        |        |       |       |       |       |

|                               |       |        |       |       |        |       |       |
|-------------------------------|-------|--------|-------|-------|--------|-------|-------|
| Median (n=16)                 | 66.74 | 102.45 | 57.18 | 38.07 | 21.72  | 55.73 | 9.93  |
| Max                           | 74.60 | 112.12 | 77.02 | 53.96 | 44.29  | 64.57 | 19.79 |
| Min                           | 59.94 | 92.26  | 42.55 | 32.72 | 6.56   | 34.13 | 3.04  |
| DOX 0.66+ERY 3.62+TMP<br>0.35 |       |        |       |       |        |       |       |
| Median (n=16)                 | 66.74 | 102.45 | 80.68 | 38.07 | 54.35  | 80.64 | 37.82 |
| Max                           | 74.60 | 112.12 | 95.28 | 53.96 | 70.73  | 90.64 | 51.36 |
| Min                           | 59.94 | 92.26  | 69.35 | 32.72 | 30.60  | 28.20 | 31.54 |
| DOX 0.66+ERY 3.62+TOB 4.1     |       |        |       |       |        |       |       |
| Median (n=32)                 | 66.74 | 102.45 | 71.10 | 38.07 | 54.27  | 76.22 | 41.00 |
| Max                           | 74.60 | 112.12 | 84.19 | 53.96 | 58.95  | 84.26 | 46.53 |
| Min                           | 59.94 | 92.26  | 24.81 | 32.72 | 36.63  | 69.30 | 36.39 |
| DOX 0.66+ERY 3.62+VAN 80      |       |        |       |       |        |       |       |
| Median (n=32)                 | 66.74 | 102.45 | 55.55 | 38.07 | 11.12  | 71.42 | -1.75 |
| Max                           | 74.60 | 112.12 | 69.28 | 53.96 | 18.14  | 75.27 | 2.35  |
| Min                           | 59.94 | 92.26  | 22.28 | 32.72 | -12.51 | 29.07 | -6.56 |
| AMP 3.56+FOX 2.25+FUS 38      |       |        |       |       |        |       |       |
| Median (n=32)                 | 79.51 | 80.36  | 68.42 | 8.33  | 23.62  | 19.20 | 0.53  |
| Max                           | 98.05 | 94.71  | 95.37 | 25.57 | 47.35  | 40.44 | 6.67  |



|                               |       |       |        |       |        |       |        |
|-------------------------------|-------|-------|--------|-------|--------|-------|--------|
| Min                           | 64.70 | 35.04 | 32.92  | 3.56  | -7.95  | 12.82 | -10.87 |
| AMP 3.56+FOX 2.25+GEN 4.4     |       |       |        |       |        |       |        |
| Median (n=32)                 | 79.51 | 80.36 | 73.83  | 8.33  | 50.59  | 29.60 | 7.86   |
| Max                           | 98.05 | 94.71 | 86.03  | 25.57 | 60.20  | 33.33 | 13.32  |
| Min                           | 64.70 | 35.04 | 60.41  | 3.56  | 15.88  | 25.33 | -5.02  |
| AMP 3.56+FOX 2.25+NTR<br>16.5 |       |       |        |       |        |       |        |
| Median (n=32)                 | 79.51 | 80.36 | 77.44  | 8.33  | 48.96  | 46.66 | 17.07  |
| Max                           | 98.05 | 94.71 | 103.36 | 25.57 | 55.06  | 57.85 | 19.15  |
| Min                           | 64.70 | 35.04 | 64.31  | 3.56  | 44.84  | 34.72 | 10.90  |
| AMP 3.56+FOX 2.25+STR 8.47    |       |       |        |       |        |       |        |
| Median (n=32)                 | 79.51 | 80.36 | 57.18  | 8.33  | 23.08  | 30.49 | 0.59   |
| Max                           | 98.05 | 94.71 | 77.02  | 25.57 | 34.32  | 48.88 | 6.41   |
| Min                           | 64.70 | 35.04 | 42.55  | 3.56  | 18.49  | -5.18 | -7.12  |
| AMP 3.56+FOX 2.25+TMP<br>0.35 |       |       |        |       |        |       |        |
| Median (n=32)                 | 79.51 | 80.36 | 80.68  | 8.33  | 89.39  | 77.11 | 42.89  |
| Max                           | 98.05 | 94.71 | 95.28  | 25.57 | 107.54 | 85.42 | 50.96  |
| Min                           | 64.70 | 35.04 | 69.35  | 3.56  | 87.48  | 38.63 | 35.31  |

|                               |       |       |       |       |       |       |        |
|-------------------------------|-------|-------|-------|-------|-------|-------|--------|
| AMP 3.56+FOX 2.25+TOB 4.1     |       |       |       |       |       |       |        |
| Median (n=32)                 | 79.51 | 80.36 | 71.10 | 8.33  | 47.33 | 34.80 | 4.74   |
| Max                           | 98.05 | 94.71 | 84.19 | 25.57 | 50.75 | 37.59 | 7.72   |
| Min                           | 64.70 | 35.04 | 24.81 | 3.56  | 38.11 | 31.22 | 0.92   |
| AMP 3.56+FOX 2.25+VAN 80      |       |       |       |       |       |       |        |
| Median (n=32)                 | 79.51 | 80.36 | 55.55 | 8.33  | 9.58  | 19.46 | 1.07   |
| Max                           | 98.05 | 94.71 | 69.28 | 25.57 | 32.33 | 63.31 | 5.64   |
| Min                           | 64.70 | 35.04 | 22.28 | 3.56  | -5.26 | -6.12 | -3.16  |
| DOX 0.66+FOX 2.25+FUS 38      |       |       |       |       |       |       |        |
| Median (n=16)                 | 66.74 | 80.36 | 68.42 | 14.61 | 21.11 | 19.20 | 1.13   |
| Max                           | 74.60 | 94.71 | 95.37 | 22.40 | 27.77 | 40.44 | 9.35   |
| Min                           | 59.94 | 35.04 | 32.92 | 3.46  | 4.66  | 12.82 | -16.88 |
| DOX 0.66+FOX 2.25+GEN 4.4     |       |       |       |       |       |       |        |
| Median (n=16)                 | 66.74 | 80.36 | 73.83 | 14.61 | 47.29 | 29.60 | 21.77  |
| Max                           | 74.60 | 94.71 | 86.03 | 22.40 | 52.81 | 33.33 | 29.16  |
| Min                           | 59.94 | 35.04 | 60.41 | 3.46  | 42.22 | 25.33 | 5.78   |
| DOX 0.66+FOX 2.25+NTR<br>16.5 |       |       |       |       |       |       |        |
| Median (n=16)                 | 66.74 | 80.36 | 77.44 | 14.61 | 53.09 | 46.66 | 25.25  |

|                               |       |       |        |       |        |       |       |
|-------------------------------|-------|-------|--------|-------|--------|-------|-------|
| Max                           | 74.60 | 94.71 | 103.36 | 22.40 | 57.29  | 57.85 | 28.94 |
| Min                           | 59.94 | 35.04 | 64.31  | 3.46  | 40.44  | 34.72 | 15.66 |
| DOX 0.66+FOX 2.25+STR 8.47    |       |       |        |       |        |       |       |
| Median (n=16)                 | 66.74 | 80.36 | 57.18  | 14.61 | 21.72  | 30.49 | 0.28  |
| Max                           | 74.60 | 94.71 | 77.02  | 22.40 | 44.29  | 48.88 | 4.22  |
| Min                           | 59.94 | 35.04 | 42.55  | 3.46  | 6.56   | -5.18 | -4.31 |
| DOX 0.66+FOX 2.25+TMP<br>0.35 |       |       |        |       |        |       |       |
| Median (n=16)                 | 66.74 | 80.36 | 80.68  | 14.61 | 54.35  | 77.11 | 26.29 |
| Max                           | 74.60 | 94.71 | 95.28  | 22.40 | 70.73  | 85.42 | 31.70 |
| Min                           | 59.94 | 35.04 | 69.35  | 3.46  | 30.60  | 38.63 | 18.46 |
| DOX 0.66+FOX 2.25+TOB 4.1     |       |       |        |       |        |       |       |
| Median (n=32)                 | 66.74 | 80.36 | 71.10  | 14.61 | 54.27  | 34.80 | 25.10 |
| Max                           | 74.60 | 94.71 | 84.19  | 22.40 | 58.95  | 37.59 | 28.36 |
| Min                           | 59.94 | 35.04 | 24.81  | 3.46  | 36.63  | 31.22 | 19.20 |
| DOX 0.66+FOX 2.25+VAN 80      |       |       |        |       |        |       |       |
| Median (n=32)                 | 66.74 | 80.36 | 55.55  | 14.61 | 11.12  | 19.46 | 2.36  |
| Max                           | 74.60 | 94.71 | 69.28  | 22.40 | 18.14  | 63.31 | 4.28  |
| Min                           | 59.94 | 35.04 | 22.28  | 3.46  | -12.51 | -6.12 | -0.09 |

|                          |       |       |        |       |        |       |       |
|--------------------------|-------|-------|--------|-------|--------|-------|-------|
| AMP 3.56+FUS 38+GEN 4.4  |       |       |        |       |        |       |       |
| Median (n=32)            | 79.51 | 68.42 | 73.83  | 23.62 | 50.59  | 50.98 | 13.77 |
| Max                      | 98.05 | 95.37 | 86.03  | 47.35 | 60.20  | 61.69 | 29.42 |
| Min                      | 64.70 | 32.92 | 60.41  | -7.95 | 15.88  | 41.91 | 0.47  |
| AMP 3.56+FUS 38+NTR 16.5 |       |       |        |       |        |       |       |
| Median (n=32)            | 79.51 | 68.42 | 77.44  | 23.62 | 48.96  | 72.18 | 58.41 |
| Max                      | 98.05 | 95.37 | 103.36 | 47.35 | 55.06  | 80.76 | 75.53 |
| Min                      | 64.70 | 32.92 | 64.31  | -7.95 | 44.84  | 49.42 | 51.78 |
| AMP 3.56+FUS 38+STR 8.47 |       |       |        |       |        |       |       |
| Median (n=32)            | 79.51 | 68.42 | 57.18  | 23.62 | 23.08  | 50.71 | 3.97  |
| Max                      | 98.05 | 95.37 | 77.02  | 47.35 | 34.32  | 66.73 | 9.16  |
| Min                      | 64.70 | 32.92 | 42.55  | -7.95 | 18.49  | 39.23 | -5.47 |
| AMP 3.56+FUS 38+TMP 0.35 |       |       |        |       |        |       |       |
| Median (n=32)            | 79.51 | 68.42 | 80.68  | 23.62 | 89.39  | 46.93 | 39.12 |
| Max                      | 98.05 | 95.37 | 95.28  | 47.35 | 107.54 | 65.37 | 43.20 |
| Min                      | 64.70 | 32.92 | 69.35  | -7.95 | 87.48  | 7.87  | 19.95 |
| AMP 3.56+FUS 38+TOB 4.1  |       |       |        |       |        |       |       |
| Median (n=32)            | 79.51 | 68.42 | 71.10  | 23.62 | 47.33  | 61.10 | 6.56  |
| Max                      | 98.05 | 95.37 | 84.19  | 47.35 | 50.75  | 65.07 | 16.07 |

|                          |       |       |        |       |       |        |        |
|--------------------------|-------|-------|--------|-------|-------|--------|--------|
| Min                      | 64.70 | 32.92 | 24.81  | -7.95 | 38.11 | 44.23  | -2.55  |
| AMP 3.56+FUS 38+VAN 80   |       |       |        |       |       |        |        |
| Median (n=32)            | 79.51 | 68.42 | 55.55  | 23.62 | 9.58  | 33.16  | 0.87   |
| Max                      | 98.05 | 95.37 | 69.28  | 47.35 | 32.33 | 37.55  | 8.50   |
| Min                      | 64.70 | 32.92 | 22.28  | -7.95 | -5.26 | -11.89 | -12.04 |
| DOX 0.66+FUS 38+GEN 4.4  |       |       |        |       |       |        |        |
| Median (n=16)            | 66.74 | 68.42 | 73.83  | 21.11 | 47.29 | 50.98  | 14.95  |
| Max                      | 74.60 | 95.37 | 86.03  | 27.77 | 52.81 | 61.69  | 44.39  |
| Min                      | 59.94 | 32.92 | 60.41  | 4.66  | 42.22 | 41.91  | -1.76  |
| DOX 0.66+FUS 38+NTR 16.5 |       |       |        |       |       |        |        |
| Median (n=16)            | 66.74 | 68.42 | 77.44  | 21.11 | 53.09 | 72.18  | 58.18  |
| Max                      | 74.60 | 95.37 | 103.36 | 27.77 | 57.29 | 80.76  | 64.87  |
| Min                      | 59.94 | 32.92 | 64.31  | 4.66  | 40.44 | 49.42  | 54.66  |
| DOX 0.66+FUS 38+STR 8.47 |       |       |        |       |       |        |        |
| Median (n=16)            | 66.74 | 68.42 | 57.18  | 21.11 | 21.72 | 50.71  | 9.32   |
| Max                      | 74.60 | 95.37 | 77.02  | 27.77 | 44.29 | 66.73  | 21.83  |
| Min                      | 59.94 | 32.92 | 42.55  | 4.66  | 6.56  | 39.23  | 4.32   |
| DOX 0.66+FUS 38+TMP 0.35 |       |       |        |       |       |        |        |
| Median (n=16)            | 66.74 | 68.42 | 80.68  | 21.11 | 54.35 | 46.93  | 21.61  |

|                           |       |       |        |       |        |        |       |
|---------------------------|-------|-------|--------|-------|--------|--------|-------|
| Max                       | 74.60 | 95.37 | 95.28  | 27.77 | 70.73  | 65.37  | 32.41 |
| Min                       | 59.94 | 32.92 | 69.35  | 4.66  | 30.60  | 7.87   | 14.57 |
| DOX 0.66+FUS 38+TOB 4.1   |       |       |        |       |        |        |       |
| Median (n=32)             | 66.74 | 68.42 | 71.10  | 21.11 | 54.27  | 61.10  | 14.08 |
| Max                       | 74.60 | 95.37 | 84.19  | 27.77 | 58.95  | 65.07  | 15.16 |
| Min                       | 59.94 | 32.92 | 24.81  | 4.66  | 36.63  | 44.23  | 2.58  |
| DOX 0.66+FUS 38+VAN 80    |       |       |        |       |        |        |       |
| Median (n=32)             | 66.74 | 68.42 | 55.55  | 21.11 | 11.12  | 33.16  | 5.42  |
| Max                       | 74.60 | 95.37 | 69.28  | 27.77 | 18.14  | 37.55  | 11.44 |
| Min                       | 59.94 | 32.92 | 22.28  | 4.66  | -12.51 | -11.89 | 1.74  |
| AMP 3.56+GEN 4.4+NTR 16.5 |       |       |        |       |        |        |       |
| Median (n=32)             | 79.51 | 73.83 | 77.44  | 50.59 | 48.96  | 59.31  | 46.08 |
| Max                       | 98.05 | 86.03 | 103.36 | 60.20 | 55.06  | 64.50  | 48.53 |
| Min                       | 64.70 | 60.41 | 64.31  | 15.88 | 44.84  | 51.01  | 43.27 |
| AMP 3.56+GEN 4.4+STR 8.47 |       |       |        |       |        |        |       |
| Median (n=32)             | 79.51 | 73.83 | 57.18  | 50.59 | 23.08  | 51.96  | 24.45 |
| Max                       | 98.05 | 86.03 | 77.02  | 60.20 | 34.32  | 66.18  | 31.58 |
| Min                       | 64.70 | 60.41 | 42.55  | 15.88 | 18.49  | 33.29  | 19.16 |
| AMP 3.56+GEN 4.4+TMP 0.35 |       |       |        |       |        |        |       |

|                           |       |       |        |       |        |       |       |
|---------------------------|-------|-------|--------|-------|--------|-------|-------|
| Median (n=32)             | 79.51 | 73.83 | 80.68  | 50.59 | 89.39  | 49.65 | 56.56 |
| Max                       | 98.05 | 86.03 | 95.28  | 60.20 | 107.54 | 72.97 | 62.26 |
| Min                       | 64.70 | 60.41 | 69.35  | 15.88 | 87.48  | 34.41 | 36.04 |
| AMP 3.56+GEN 4.4+TOB 4.1  |       |       |        |       |        |       |       |
| Median (n=32)             | 79.51 | 73.83 | 71.10  | 50.59 | 47.33  | 59.75 | 24.73 |
| Max                       | 98.05 | 86.03 | 84.19  | 60.20 | 50.75  | 76.66 | 33.43 |
| Min                       | 64.70 | 60.41 | 24.81  | 15.88 | 38.11  | 36.72 | -4.89 |
| AMP 3.56+GEN 4.4+VAN 80   |       |       |        |       |        |       |       |
| Median (n=32)             | 79.51 | 73.83 | 55.55  | 50.59 | 9.58   | 54.44 | 14.25 |
| Max                       | 98.05 | 86.03 | 69.28  | 60.20 | 32.33  | 68.70 | 23.93 |
| Min                       | 64.70 | 60.41 | 22.28  | 15.88 | -5.26  | 13.32 | 2.72  |
| DOX 0.66+GEN 4.4+NTR 16.5 |       |       |        |       |        |       |       |
| Median (n=16)             | 66.74 | 73.83 | 77.44  | 47.29 | 53.09  | 59.31 | 43.46 |
| Max                       | 74.60 | 86.03 | 103.36 | 52.81 | 57.29  | 64.50 | 65.47 |
| Min                       | 59.94 | 60.41 | 64.31  | 42.22 | 40.44  | 51.01 | 39.15 |
| DOX 0.66+GEN 4.4+STR 8.47 |       |       |        |       |        |       |       |
| Median (n=16)             | 66.74 | 73.83 | 57.18  | 47.29 | 21.72  | 51.96 | 8.31  |
| Max                       | 74.60 | 86.03 | 77.02  | 52.81 | 44.29  | 66.18 | 11.95 |
| Min                       | 59.94 | 60.41 | 42.55  | 42.22 | 6.56   | 33.29 | 4.10  |

|                                   |       |       |       |       |        |       |        |
|-----------------------------------|-------|-------|-------|-------|--------|-------|--------|
| <b>DOX 0.66+GEN 4.4+TMP 0.35</b>  |       |       |       |       |        |       |        |
| Median (n=16)                     | 66.74 | 73.83 | 80.68 | 47.29 | 54.35  | 49.65 | 35.81  |
| Max                               | 74.60 | 86.03 | 95.28 | 52.81 | 70.73  | 72.97 | 49.45  |
| Min                               | 59.94 | 60.41 | 69.35 | 42.22 | 30.60  | 34.41 | 11.91  |
| <b>DOX 0.66+GEN 4.4+TOB 4.1</b>   |       |       |       |       |        |       |        |
| Median (n=32)                     | 66.74 | 73.83 | 71.10 | 47.29 | 54.27  | 59.75 | 37.40  |
| Max                               | 74.60 | 86.03 | 84.19 | 52.81 | 58.95  | 76.66 | 47.69  |
| Min                               | 59.94 | 60.41 | 24.81 | 42.22 | 36.63  | 36.72 | 27.05  |
| <b>DOX 0.66+GEN 4.4+VAN 80</b>    |       |       |       |       |        |       |        |
| Median (n=32)                     | 66.74 | 73.83 | 55.55 | 47.29 | 11.12  | 54.44 | 8.12   |
| Max                               | 74.60 | 86.03 | 69.28 | 52.81 | 18.14  | 68.70 | 15.17  |
| Min                               | 59.94 | 60.41 | 22.28 | 42.22 | -12.51 | 13.32 | -17.53 |
| <b>CHL 88.4+CLI 13.3+CPR 0.04</b> |       |       |       |       |        |       |        |
| Median (n=16)                     | 79.93 | 85.73 | 68.75 | 64.60 | 59.26  | 48.51 | 53.01  |
| Max                               | 89.78 | 93.78 | 81.60 | 70.79 | 66.26  | 55.00 | 65.81  |
| Min                               | 76.34 | 82.45 | 61.44 | 62.23 | 50.17  | 45.35 | 42.26  |
| <b>CHL 88.4+CLI 13.3+DOX 0.66</b> |       |       |       |       |        |       |        |
| Median (n=16)                     | 79.93 | 85.73 | 66.74 | 64.60 | 53.28  | 55.62 | 51.03  |
| Max                               | 89.78 | 93.78 | 74.60 | 70.79 | 58.97  | 57.88 | 61.01  |



|                            |       |       |        |       |       |       |       |
|----------------------------|-------|-------|--------|-------|-------|-------|-------|
| Min                        | 76.34 | 82.45 | 59.94  | 62.23 | 46.10 | 33.60 | 36.21 |
| CHL 88.4+CLI 13.3+ERY 3.62 |       |       |        |       |       |       |       |
| Median (n=16)              | 79.93 | 85.73 | 102.45 | 64.60 | 88.74 | 80.27 | 72.08 |
| Max                        | 89.78 | 93.78 | 112.12 | 70.79 | 99.59 | 84.78 | 87.96 |
| Min                        | 76.34 | 82.45 | 92.26  | 62.23 | 83.72 | 74.41 | 51.39 |
| CHL 88.4+CLI 13.3+FUS 38   |       |       |        |       |       |       |       |
| Median (n=16)              | 79.93 | 85.73 | 68.42  | 64.60 | 48.88 | 52.71 | 43.84 |
| Max                        | 89.78 | 93.78 | 95.37  | 70.79 | 52.19 | 58.40 | 54.28 |
| Min                        | 76.34 | 82.45 | 32.92  | 62.23 | 44.28 | 49.34 | 32.90 |
| CHL 88.4+CLI 13.3+GEN 4.4  |       |       |        |       |       |       |       |
| Median (n=16)              | 79.93 | 85.73 | 73.83  | 64.60 | 66.50 | 52.38 | 55.98 |
| Max                        | 89.78 | 93.78 | 86.03  | 70.79 | 69.73 | 62.10 | 69.80 |
| Min                        | 76.34 | 82.45 | 60.41  | 62.23 | 38.56 | 38.88 | 43.52 |
| CHL 88.4+CLI 13.3+NTR 16.5 |       |       |        |       |       |       |       |
| Median (n=16)              | 79.93 | 85.73 | 77.44  | 64.60 | 63.48 | 65.25 | 55.44 |
| Max                        | 89.78 | 93.78 | 103.36 | 70.79 | 69.02 | 82.74 | 69.38 |
| Min                        | 76.34 | 82.45 | 64.31  | 62.23 | 61.83 | 34.35 | 29.21 |
| CHL 88.4+CLI 13.3+STR 8.47 |       |       |        |       |       |       |       |
| Median (n=16)              | 79.93 | 85.73 | 57.18  | 64.60 | 57.68 | 50.17 | 46.28 |

|                            |       |       |        |       |       |       |       |
|----------------------------|-------|-------|--------|-------|-------|-------|-------|
| Max                        | 89.78 | 93.78 | 77.02  | 70.79 | 65.61 | 66.01 | 53.15 |
| Min                        | 76.34 | 82.45 | 42.55  | 62.23 | 44.75 | 28.12 | 42.60 |
| CHL 88.4+CLI 13.3+TMP 0.35 |       |       |        |       |       |       |       |
| Median (n=8)               | 79.93 | 85.73 | 80.68  | 64.60 | 64.13 | 65.29 | 55.34 |
| Max                        | 89.78 | 93.78 | 95.28  | 70.79 | 70.64 | 76.70 | 61.46 |
| Min                        | 76.34 | 82.45 | 69.35  | 62.23 | 55.75 | 51.25 | 51.62 |
| CHL 88.4+CLI 13.3+TOB 4.1  |       |       |        |       |       |       |       |
| Median (n=32)              | 79.93 | 85.73 | 71.10  | 64.60 | 73.13 | 64.55 | 55.04 |
| Max                        | 89.78 | 93.78 | 84.19  | 70.79 | 90.95 | 70.55 | 65.89 |
| Min                        | 76.34 | 82.45 | 24.81  | 62.23 | 41.54 | 42.49 | 51.18 |
| CHL 88.4+CLI 13.3+VAN 80   |       |       |        |       |       |       |       |
| Median (n=32)              | 79.93 | 85.73 | 55.55  | 64.60 | 56.42 | 54.43 | 31.23 |
| Max                        | 89.78 | 93.78 | 69.28  | 70.79 | 64.37 | 62.33 | 36.45 |
| Min                        | 76.34 | 82.45 | 22.28  | 62.23 | 38.52 | 10.37 | 25.34 |
| CPR 0.04+GEN 4.4+NTR 16.5  |       |       |        |       |       |       |       |
| Median (n=16)              | 68.75 | 73.83 | 77.44  | 43.85 | 40.46 | 59.31 | 34.95 |
| Max                        | 81.60 | 86.03 | 103.36 | 55.82 | 47.50 | 64.50 | 62.63 |
| Min                        | 61.44 | 60.41 | 64.31  | 40.21 | 34.96 | 51.01 | 28.53 |
| CPR 0.04+GEN 4.4+STR 8.47  |       |       |        |       |       |       |       |

|                            |       |       |       |       |       |       |       |
|----------------------------|-------|-------|-------|-------|-------|-------|-------|
| Median (n=16)              | 68.75 | 73.83 | 57.18 | 43.85 | 46.40 | 51.96 | 39.04 |
| Max                        | 81.60 | 86.03 | 77.02 | 55.82 | 50.59 | 66.18 | 45.54 |
| Min                        | 61.44 | 60.41 | 42.55 | 40.21 | 32.43 | 33.29 | 6.18  |
| CPR 0.04+GEN 4.4+TMP 0.35  |       |       |       |       |       |       |       |
| Median (n=16)              | 68.75 | 73.83 | 80.68 | 43.85 | 38.56 | 49.65 | 36.49 |
| Max                        | 81.60 | 86.03 | 95.28 | 55.82 | 50.13 | 72.97 | 39.80 |
| Min                        | 61.44 | 60.41 | 69.35 | 40.21 | 7.17  | 34.41 | 30.71 |
| CPR 0.04+GEN 4.4+TOB 4.1   |       |       |       |       |       |       |       |
| Median (n=32)              | 68.75 | 73.83 | 71.10 | 43.85 | 56.65 | 59.75 | 45.17 |
| Max                        | 81.60 | 86.03 | 84.19 | 55.82 | 59.64 | 76.66 | 51.61 |
| Min                        | 61.44 | 60.41 | 24.81 | 40.21 | 7.91  | 36.72 | 35.40 |
| CPR 0.04+GEN 4.4+VAN 80    |       |       |       |       |       |       |       |
| Median (n=32)              | 68.75 | 73.83 | 55.55 | 43.85 | 27.31 | 54.44 | 19.36 |
| Max                        | 81.60 | 86.03 | 69.28 | 55.82 | 35.95 | 68.70 | 26.76 |
| Min                        | 61.44 | 60.41 | 22.28 | 40.21 | 7.10  | 13.32 | 11.47 |
| CHL 88.4+CPR 0.04+DOX 0.66 |       |       |       |       |       |       |       |
| Median (n=16)              | 79.93 | 68.75 | 66.74 | 59.26 | 53.28 | 40.45 | 33.03 |
| Max                        | 89.78 | 81.60 | 74.60 | 66.26 | 58.97 | 47.06 | 41.65 |
| Min                        | 76.34 | 61.44 | 59.94 | 50.17 | 46.10 | 25.69 | 23.41 |

|                            |       |       |        |       |       |       |       |
|----------------------------|-------|-------|--------|-------|-------|-------|-------|
| CHL 88.4+CPR 0.04+ERY 3.62 |       |       |        |       |       |       |       |
| Median (n=16)              | 79.93 | 68.75 | 102.45 | 59.26 | 88.74 | 63.47 | 55.40 |
| Max                        | 89.78 | 81.60 | 112.12 | 66.26 | 99.59 | 70.41 | 66.80 |
| Min                        | 76.34 | 61.44 | 92.26  | 50.17 | 83.72 | 59.44 | 25.95 |
| CHL 88.4+CPR 0.04+FOX 2.25 |       |       |        |       |       |       |       |
| Median (n=16)              | 79.93 | 68.75 | 80.36  | 59.26 | 31.79 | 28.68 | 19.33 |
| Max                        | 89.78 | 81.60 | 94.71  | 66.26 | 45.60 | 35.14 | 26.21 |
| Min                        | 76.34 | 61.44 | 35.04  | 50.17 | 18.40 | 23.57 | -4.03 |
| CHL 88.4+CPR 0.04+FUS 38   |       |       |        |       |       |       |       |
| Median (n=16)              | 79.93 | 68.75 | 68.42  | 59.26 | 48.88 | 61.41 | 37.34 |
| Max                        | 89.78 | 81.60 | 95.37  | 66.26 | 52.19 | 63.42 | 42.02 |
| Min                        | 76.34 | 61.44 | 32.92  | 50.17 | 44.28 | 55.16 | 26.06 |
| CHL 88.4+CPR 0.04+GEN 4.4  |       |       |        |       |       |       |       |
| Median (n=16)              | 79.93 | 68.75 | 73.83  | 59.26 | 66.50 | 43.85 | 47.81 |
| Max                        | 89.78 | 81.60 | 86.03  | 66.26 | 69.73 | 55.82 | 56.45 |
| Min                        | 76.34 | 61.44 | 60.41  | 50.17 | 38.56 | 40.21 | 2.09  |
| CHL 88.4+CPR 0.04+NTR 16.5 |       |       |        |       |       |       |       |
| Median (n=16)              | 79.93 | 68.75 | 77.44  | 59.26 | 63.48 | 40.46 | 45.32 |
| Max                        | 89.78 | 81.60 | 103.36 | 66.26 | 69.02 | 47.50 | 56.09 |

|                            |       |       |       |       |       |       |       |
|----------------------------|-------|-------|-------|-------|-------|-------|-------|
| Min                        | 76.34 | 61.44 | 64.31 | 50.17 | 61.83 | 34.96 | 29.63 |
| CHL 88.4+CPR 0.04+STR 8.47 |       |       |       |       |       |       |       |
| Median (n=16)              | 79.93 | 68.75 | 57.18 | 59.26 | 57.68 | 46.40 | 42.94 |
| Max                        | 89.78 | 81.60 | 77.02 | 66.26 | 65.61 | 50.59 | 51.10 |
| Min                        | 76.34 | 61.44 | 42.55 | 50.17 | 44.75 | 32.43 | 30.00 |
| CHL 88.4+CPR 0.04+TMP 0.35 |       |       |       |       |       |       |       |
| Median (n=16)              | 79.93 | 68.75 | 80.68 | 59.26 | 64.13 | 38.56 | 46.30 |
| Max                        | 89.78 | 81.60 | 95.28 | 66.26 | 70.64 | 50.13 | 47.09 |
| Min                        | 76.34 | 61.44 | 69.35 | 50.17 | 55.75 | 7.17  | 40.50 |
| CHL 88.4+CPR 0.04+TOB 4.1  |       |       |       |       |       |       |       |
| Median (n=32)              | 79.93 | 68.75 | 71.10 | 59.26 | 73.13 | 56.65 | 51.47 |
| Max                        | 89.78 | 81.60 | 84.19 | 66.26 | 90.95 | 59.64 | 56.42 |
| Min                        | 76.34 | 61.44 | 24.81 | 50.17 | 41.54 | 7.91  | 47.66 |
| CHL 88.4+CPR 0.04+VAN 80   |       |       |       |       |       |       |       |
| Median (n=32)              | 79.93 | 68.75 | 55.55 | 59.26 | 56.42 | 27.31 | 19.22 |
| Max                        | 89.78 | 81.60 | 69.28 | 66.26 | 64.37 | 35.95 | 28.52 |
| Min                        | 76.34 | 61.44 | 22.28 | 50.17 | 38.52 | 7.10  | 3.85  |
| CHL 88.4+FOX 2.25+FUS 38   |       |       |       |       |       |       |       |
| Median (n=16)              | 79.93 | 80.36 | 68.43 | 31.79 | 48.88 | 19.20 | 10.14 |

|                            |       |       |        |       |       |       |       |
|----------------------------|-------|-------|--------|-------|-------|-------|-------|
| Max                        | 89.78 | 94.71 | 95.37  | 45.60 | 52.19 | 40.44 | 24.94 |
| Min                        | 76.34 | 35.04 | 32.92  | 18.40 | 44.28 | 12.82 | -1.04 |
| CHL 88.4+FOX 2.25+GEN 4.4  |       |       |        |       |       |       |       |
| Median (n=16)              | 79.93 | 80.36 | 73.83  | 31.79 | 66.50 | 29.60 | 18.58 |
| Max                        | 89.78 | 94.71 | 86.03  | 45.60 | 69.73 | 33.33 | 26.71 |
| Min                        | 76.34 | 35.04 | 60.41  | 18.40 | 38.56 | 25.33 | 9.59  |
| CHL 88.4+FOX 2.25+NTR 16.5 |       |       |        |       |       |       |       |
| Median (n=16)              | 79.93 | 80.36 | 77.44  | 31.79 | 63.48 | 46.66 | 26.49 |
| Max                        | 89.78 | 94.71 | 103.36 | 45.60 | 69.02 | 57.85 | 41.04 |
| Min                        | 76.34 | 35.04 | 64.31  | 18.40 | 61.83 | 34.72 | 11.98 |
| CHL 88.4+FOX 2.25+STR 8.47 |       |       |        |       |       |       |       |
| Median (n=16)              | 79.93 | 80.36 | 57.18  | 31.79 | 57.68 | 30.49 | 15.73 |
| Max                        | 89.78 | 94.71 | 77.02  | 45.60 | 65.61 | 48.88 | 21.74 |
| Min                        | 76.34 | 35.04 | 42.55  | 18.40 | 44.75 | -5.18 | 2.85  |
| CHL 88.4+FOX 2.25+TMP 0.35 |       |       |        |       |       |       |       |
| Median (n=8)               | 79.93 | 80.36 | 80.68  | 31.79 | 64.13 | 77.11 | 42.05 |
| Max                        | 89.78 | 94.71 | 95.28  | 45.60 | 70.64 | 85.42 | 58.10 |
| Min                        | 76.34 | 35.04 | 69.35  | 18.40 | 55.75 | 38.63 | 33.54 |
| CHL 88.4+FOX 2.25+TOB 4.1  |       |       |        |       |       |       |       |

|                            |        |       |        |       |       |       |       |
|----------------------------|--------|-------|--------|-------|-------|-------|-------|
| Median (n=32)              | 79.93  | 80.36 | 71.10  | 31.79 | 73.13 | 34.80 | 19.27 |
| Max                        | 89.78  | 94.71 | 84.19  | 45.60 | 90.95 | 37.59 | 29.62 |
| Min                        | 76.34  | 35.04 | 24.81  | 18.40 | 41.54 | 31.22 | 1.03  |
| CHL 88.4+FOX 2.25+VAN 80   |        |       |        |       |       |       |       |
| Median (n=32)              | 79.93  | 80.36 | 55.55  | 31.79 | 56.42 | 19.46 | 10.72 |
| Max                        | 89.78  | 94.71 | 69.28  | 45.60 | 64.37 | 63.31 | 18.69 |
| Min                        | 76.34  | 35.04 | 22.28  | 18.40 | 38.52 | -6.12 | 5.01  |
| ERY 3.62+FOX 2.25+FUS 38   |        |       |        |       |       |       |       |
| Median (n=16)              | 102.45 | 80.36 | 68.43  | 62.01 | 52.31 | 19.20 | 20.21 |
| Max                        | 112.12 | 94.71 | 95.37  | 71.19 | 65.73 | 40.44 | 29.13 |
| Min                        | 92.26  | 35.04 | 32.92  | 51.25 | 36.58 | 12.82 | 15.71 |
| ERY 3.62+FOX 2.25+GEN 4.4  |        |       |        |       |       |       |       |
| Median (n=16)              | 102.45 | 80.36 | 73.83  | 62.01 | 67.28 | 29.60 | 26.73 |
| Max                        | 112.12 | 94.71 | 86.03  | 71.19 | 78.35 | 33.33 | 62.28 |
| Min                        | 92.26  | 35.04 | 60.41  | 51.25 | 21.17 | 25.33 | 19.34 |
| ERY 3.62+FOX 2.25+NTR 16.5 |        |       |        |       |       |       |       |
| Median (n=16)              | 102.45 | 80.36 | 77.44  | 62.01 | 84.06 | 46.66 | 33.74 |
| Max                        | 112.12 | 94.71 | 103.36 | 71.19 | 87.25 | 57.85 | 50.75 |
| Min                        | 92.26  | 35.04 | 64.31  | 51.25 | 79.31 | 34.72 | 22.64 |

|                               |       |        |        |       |       |       |        |
|-------------------------------|-------|--------|--------|-------|-------|-------|--------|
| CPR 0.04+NTR 16.5+STR 8.47    |       |        |        |       |       |       |        |
| Median (n=16)                 | 68.75 | 77.44  | 57.18  | 40.46 | 46.40 | -1.04 | 7.75   |
| Max                           | 81.60 | 103.36 | 77.02  | 47.50 | 50.59 | 6.07  | 13.98  |
| Min                           | 61.44 | 64.31  | 42.55  | 34.96 | 32.43 | -5.76 | -10.66 |
| CPR 0.04+NTR 16.5+TMP 0.35    |       |        |        |       |       |       |        |
| Median (n=16)                 | 68.75 | 77.44  | 80.68  | 40.46 | 38.56 | 59.58 | 30.43  |
| Max                           | 81.60 | 103.36 | 95.28  | 47.50 | 50.13 | 76.21 | 34.80  |
| Min                           | 61.44 | 64.31  | 69.35  | 34.96 | 7.17  | 39.33 | 16.73  |
| CPR 0.04+NTR 16.5+TOB 4.1     |       |        |        |       |       |       |        |
| Median (n=32)                 | 68.75 | 77.44  | 71.10  | 40.46 | 56.65 | 62.07 | 40.50  |
| Max                           | 81.60 | 103.36 | 84.19  | 47.50 | 59.64 | 71.72 | 50.56  |
| Min                           | 61.44 | 64.31  | 24.81  | 34.96 | 7.91  | 52.22 | 11.06  |
| CPR 0.04+NTR 16.5+VAN 80      |       |        |        |       |       |       |        |
| Median (n=32)                 | 68.75 | 77.44  | 55.55  | 40.46 | 27.31 | 4.46  | 5.89   |
| Max                           | 81.60 | 103.36 | 69.28  | 47.50 | 35.95 | 7.53  | 17.17  |
| Min                           | 61.44 | 64.31  | 22.28  | 34.96 | 7.10  | 1.83  | -0.77  |
| CHL 88.4+DOX 0.66+ERY<br>3.62 |       |        |        |       |       |       |        |
| Median (n=16)                 | 79.93 | 66.74  | 102.45 | 53.28 | 88.74 | 38.07 | 47.31  |



|                               |       |       |        |       |       |       |       |
|-------------------------------|-------|-------|--------|-------|-------|-------|-------|
| Max                           | 89.78 | 74.60 | 112.12 | 58.97 | 99.59 | 53.96 | 62.24 |
| Min                           | 76.34 | 59.94 | 92.26  | 46.10 | 83.72 | 32.72 | 36.77 |
| CHL 88.4+DOX 0.66+FOX<br>2.25 |       |       |        |       |       |       |       |
| Median (n=16)                 | 79.93 | 66.74 | 80.36  | 53.28 | 31.79 | 14.61 | 12.53 |
| Max                           | 89.78 | 74.60 | 94.71  | 58.97 | 45.60 | 22.40 | 23.36 |
| Min                           | 76.34 | 59.94 | 35.04  | 46.10 | 18.40 | 3.46  | 5.35  |
| CHL 88.4+DOX 0.66+FUS 38      |       |       |        |       |       |       |       |
| Median (n=16)                 | 79.93 | 66.74 | 68.43  | 53.28 | 48.88 | 21.11 | 13.10 |
| Max                           | 89.78 | 74.60 | 95.37  | 58.97 | 52.19 | 27.77 | 16.24 |
| Min                           | 76.34 | 59.94 | 32.92  | 46.10 | 44.28 | 4.66  | 5.69  |
| CHL 88.4+DOX 0.66+GEN 4.4     |       |       |        |       |       |       |       |
| Median (n=16)                 | 79.93 | 66.74 | 73.83  | 53.28 | 66.50 | 47.29 | 40.14 |
| Max                           | 89.78 | 74.60 | 86.03  | 58.97 | 69.73 | 52.81 | 46.80 |
| Min                           | 76.34 | 59.94 | 60.41  | 46.10 | 38.56 | 42.22 | 27.24 |
| CHL 88.4+DOX 0.66+NTR<br>16.5 |       |       |        |       |       |       |       |
| Median (n=16)                 | 79.93 | 66.74 | 77.44  | 53.28 | 63.48 | 53.09 | 41.45 |
| Max                           | 89.78 | 74.60 | 103.36 | 58.97 | 69.02 | 57.29 | 48.55 |

|                               |       |       |       |       |       |        |       |
|-------------------------------|-------|-------|-------|-------|-------|--------|-------|
| Min                           | 76.34 | 59.94 | 64.31 | 46.10 | 61.83 | 40.44  | 19.24 |
| CHL 88.4+DOX 0.66+STR 8.47    |       |       |       |       |       |        |       |
| Median (n=16)                 | 79.93 | 66.74 | 57.18 | 53.28 | 57.68 | 21.72  | 20.18 |
| Max                           | 89.78 | 74.60 | 77.02 | 58.97 | 65.61 | 44.29  | 28.39 |
| Min                           | 76.34 | 59.94 | 42.55 | 46.10 | 44.75 | 6.56   | -0.95 |
| CHL 88.4+DOX 0.66+TMP<br>0.35 |       |       |       |       |       |        |       |
| Median (n=16)                 | 79.93 | 66.74 | 80.68 | 53.28 | 64.13 | 54.35  | 40.30 |
| Max                           | 89.78 | 74.60 | 95.28 | 58.97 | 70.64 | 70.73  | 50.49 |
| Min                           | 76.34 | 59.94 | 69.35 | 46.10 | 55.75 | 30.60  | 38.65 |
| CHL 88.4+DOX 0.66+TOB 4.1     |       |       |       |       |       |        |       |
| Median (n=32)                 | 79.93 | 66.74 | 71.10 | 53.28 | 73.13 | 54.27  | 48.26 |
| Max                           | 89.78 | 74.60 | 84.19 | 58.97 | 90.95 | 58.95  | 55.05 |
| Min                           | 76.34 | 59.94 | 24.81 | 46.10 | 41.54 | 36.63  | 39.03 |
| CHL 88.4+DOX 0.66+VAN 80      |       |       |       |       |       |        |       |
| Median (n=32)                 | 79.93 | 66.74 | 55.55 | 53.28 | 56.42 | 11.12  | 13.29 |
| Max                           | 89.78 | 74.60 | 69.28 | 58.97 | 64.37 | 18.14  | 27.15 |
| Min                           | 76.34 | 59.94 | 22.28 | 46.10 | 38.52 | -12.51 | 6.61  |
| CHL 88.4+ERY 3.62+FOX 2.25    |       |       |       |       |       |        |       |

|                            |       |        |        |       |       |       |       |
|----------------------------|-------|--------|--------|-------|-------|-------|-------|
| Median (n=16)              | 79.93 | 102.45 | 80.36  | 88.74 | 31.79 | 62.01 | 24.64 |
| Max                        | 89.78 | 112.12 | 94.71  | 99.59 | 45.60 | 71.19 | 54.00 |
| Min                        | 76.34 | 92.26  | 35.04  | 83.72 | 18.40 | 51.25 | 6.91  |
| CHL 88.4+ERY 3.62+FUS 38   |       |        |        |       |       |       |       |
| Median (n=16)              | 79.93 | 102.45 | 68.43  | 88.74 | 48.88 | 52.31 | 52.68 |
| Max                        | 89.78 | 112.12 | 95.37  | 99.59 | 52.19 | 65.73 | 62.12 |
| Min                        | 76.34 | 92.26  | 32.92  | 83.72 | 44.28 | 36.58 | 42.49 |
| CHL 88.4+ERY 3.62+GEN 4.4  |       |        |        |       |       |       |       |
| Median (n=16)              | 79.93 | 102.45 | 73.83  | 88.74 | 66.50 | 67.28 | 71.63 |
| Max                        | 89.78 | 112.12 | 86.03  | 99.59 | 69.73 | 78.35 | 76.43 |
| Min                        | 76.34 | 92.26  | 60.41  | 83.72 | 38.56 | 21.17 | 32.61 |
| CHL 88.4+ERY 3.62+NTR 16.5 |       |        |        |       |       |       |       |
| Median (n=16)              | 79.93 | 102.45 | 77.44  | 88.74 | 63.48 | 84.06 | 63.84 |
| Max                        | 89.78 | 112.12 | 103.36 | 99.59 | 69.02 | 87.25 | 70.35 |
| Min                        | 76.34 | 92.26  | 64.31  | 83.72 | 61.83 | 79.31 | 53.36 |
| CHL 88.4+ERY 3.62+STR 8.47 |       |        |        |       |       |       |       |
| Median (n=16)              | 79.93 | 102.45 | 57.18  | 88.74 | 57.68 | 55.73 | 64.41 |
| Max                        | 89.78 | 112.12 | 77.02  | 99.59 | 65.61 | 64.57 | 66.93 |
| Min                        | 76.34 | 92.26  | 42.55  | 83.72 | 44.75 | 34.13 | 59.24 |

|                            |       |        |       |       |       |       |       |
|----------------------------|-------|--------|-------|-------|-------|-------|-------|
| CHL 88.4+ERY 3.62+TMP 0.35 |       |        |       |       |       |       |       |
| Median (n=8)               | 79.93 | 102.45 | 80.68 | 88.74 | 64.13 | 80.64 | 56.20 |
| Max                        | 89.78 | 112.12 | 95.28 | 99.59 | 70.64 | 90.64 | 67.84 |
| Min                        | 76.34 | 92.26  | 69.35 | 83.72 | 55.75 | 28.20 | 33.17 |
| CHL 88.4+ERY 3.62+TOB 4.1  |       |        |       |       |       |       |       |
| Median (n=32)              | 79.93 | 102.45 | 71.10 | 88.74 | 73.13 | 76.22 | 76.16 |
| Max                        | 89.78 | 112.12 | 84.19 | 99.59 | 90.95 | 84.26 | 90.95 |
| Min                        | 76.34 | 92.26  | 24.81 | 83.72 | 41.54 | 69.30 | 65.97 |
| CHL 88.4+ERY 3.62+VAN 80   |       |        |       |       |       |       |       |
| Median (n=32)              | 79.93 | 102.45 | 55.55 | 88.74 | 56.42 | 71.42 | 55.07 |
| Max                        | 89.78 | 112.12 | 69.28 | 99.59 | 64.37 | 75.27 | 57.13 |
| Min                        | 76.34 | 92.26  | 22.28 | 83.72 | 38.52 | 29.07 | 47.03 |
| CPR 0.04+STR 8.47+TMP 0.35 |       |        |       |       |       |       |       |
| Median (n=16)              | 68.75 | 57.18  | 80.68 | 46.40 | 38.56 | 46.20 | 38.23 |
| Max                        | 81.60 | 77.02  | 95.28 | 50.59 | 50.13 | 59.14 | 49.09 |
| Min                        | 61.44 | 42.55  | 69.35 | 32.43 | 7.17  | 39.27 | -0.90 |
| CPR 0.04+TMP 0.35+TOB 4.1  |       |        |       |       |       |       |       |
| Median (n=32)              | 68.75 | 80.68  | 71.10 | 38.56 | 56.65 | 49.81 | 47.55 |
| Max                        | 81.60 | 95.28  | 84.19 | 50.13 | 59.64 | 65.61 | 52.87 |

|                                   |       |       |       |       |       |       |        |
|-----------------------------------|-------|-------|-------|-------|-------|-------|--------|
| Min                               | 61.44 | 69.35 | 24.81 | 7.17  | 7.91  | 10.01 | 6.95   |
| <b>CPR 0.04+TMP 0.35+VAN 80</b>   |       |       |       |       |       |       |        |
| Median (n=32)                     | 68.75 | 80.68 | 55.55 | 38.56 | 27.31 | 32.45 | 6.02   |
| Max                               | 81.60 | 95.28 | 69.28 | 50.13 | 35.95 | 69.49 | 14.26  |
| Min                               | 61.44 | 69.35 | 22.28 | 7.17  | 7.10  | 23.81 | -15.03 |
| <b>CPR 0.04+STR 8.47+TOB 4.1</b>  |       |       |       |       |       |       |        |
| Median (n=32)                     | 68.75 | 57.18 | 71.10 | 46.40 | 56.65 | 56.45 | 47.73  |
| Max                               | 81.60 | 77.02 | 84.19 | 50.59 | 59.64 | 65.02 | 54.03  |
| Min                               | 61.44 | 42.55 | 24.81 | 32.43 | 7.91  | 50.40 | 43.67  |
| <b>CPR 0.04+STR 8.47+VAN 80</b>   |       |       |       |       |       |       |        |
| Median (n=32)                     | 68.75 | 57.18 | 55.55 | 46.40 | 27.31 | 35.57 | 13.79  |
| Max                               | 81.60 | 77.02 | 69.28 | 50.59 | 35.95 | 39.85 | 20.76  |
| Min                               | 61.44 | 42.55 | 22.28 | 32.43 | 7.10  | 10.50 | -2.38  |
| <b>CHL 88.4+CLI 13.3+FOX 2.25</b> |       |       |       |       |       |       |        |
| Median (n=16)                     | 79.93 | 85.73 | 80.36 | 64.60 | 31.79 | 55.83 | 19.80  |
| Max                               | 89.78 | 93.78 | 94.71 | 70.79 | 45.60 | 65.15 | 26.95  |
| Min                               | 76.34 | 82.45 | 35.04 | 62.23 | 18.40 | 34.19 | 10.53  |
| <b>CLI 13.3+CPR 0.04+GEN 4.4</b>  |       |       |       |       |       |       |        |
| Median (n=16)                     | 85.73 | 68.75 | 73.83 | 48.51 | 52.38 | 43.85 | 48.79  |

|                            |       |       |        |       |       |       |       |
|----------------------------|-------|-------|--------|-------|-------|-------|-------|
| Max                        | 93.78 | 81.60 | 86.03  | 55.00 | 62.10 | 55.82 | 51.81 |
| Min                        | 82.45 | 61.44 | 60.41  | 45.35 | 38.88 | 40.21 | 40.49 |
| CLI 13.3+CPR 0.04+NTR 16.5 |       |       |        |       |       |       |       |
| Median (n=16)              | 85.73 | 68.75 | 77.44  | 48.51 | 65.25 | 40.46 | 43.95 |
| Max                        | 93.78 | 81.60 | 103.36 | 55.00 | 82.74 | 47.50 | 57.18 |
| Min                        | 82.45 | 61.44 | 64.31  | 45.35 | 34.35 | 34.96 | 35.41 |
| CLI 13.3+CPR 0.04+STR 8.47 |       |       |        |       |       |       |       |
| Median (n=16)              | 85.73 | 68.75 | 57.18  | 48.51 | 50.17 | 46.40 | 38.41 |
| Max                        | 93.78 | 81.60 | 77.02  | 55.00 | 66.01 | 50.59 | 41.37 |
| Min                        | 82.45 | 61.44 | 42.55  | 45.35 | 28.12 | 32.43 | 33.26 |
| CLI 13.3+CPR 0.04+TMP 0.35 |       |       |        |       |       |       |       |
| Median (n=16)              | 85.73 | 68.75 | 80.68  | 48.51 | 65.29 | 38.56 | 31.30 |
| Max                        | 93.78 | 81.60 | 95.28  | 55.00 | 76.70 | 50.13 | 36.37 |
| Min                        | 82.45 | 61.44 | 69.35  | 45.35 | 51.25 | 7.17  | 26.21 |
| CLI 13.3+CPR 0.04+TOB 4.1  |       |       |        |       |       |       |       |
| Median (n=32)              | 85.73 | 68.75 | 71.10  | 48.51 | 64.55 | 56.65 | 44.58 |
| Max                        | 93.78 | 81.60 | 84.19  | 55.00 | 70.55 | 59.64 | 52.28 |
| Min                        | 82.45 | 61.44 | 24.81  | 45.35 | 42.49 | 7.91  | 24.97 |
| CLI 13.3+CPR 0.04+VAN 80   |       |       |        |       |       |       |       |

|                          |       |       |        |       |       |       |       |
|--------------------------|-------|-------|--------|-------|-------|-------|-------|
| Median (n=32)            | 85.73 | 68.75 | 55.55  | 48.51 | 54.43 | 27.31 | 19.99 |
| Max                      | 93.78 | 81.60 | 69.28  | 55.00 | 62.33 | 35.95 | 28.44 |
| Min                      | 82.45 | 61.44 | 22.28  | 45.35 | 10.37 | 7.10  | 9.47  |
| CLI 13.3+FUS 38+GEN 4.4  |       |       |        |       |       |       |       |
| Median (n=16)            | 85.73 | 68.43 | 73.83  | 52.71 | 52.38 | 50.98 | 49.48 |
| Max                      | 93.78 | 95.37 | 86.03  | 58.40 | 62.10 | 61.69 | 59.11 |
| Min                      | 82.45 | 32.92 | 60.41  | 49.34 | 38.88 | 41.91 | 47.78 |
| CLI 13.3+FUS 38+NTR 16.5 |       |       |        |       |       |       |       |
| Median (n=16)            | 85.73 | 68.43 | 77.44  | 52.71 | 65.25 | 72.18 | 62.49 |
| Max                      | 93.78 | 95.37 | 103.36 | 58.40 | 82.74 | 80.76 | 69.30 |
| Min                      | 82.45 | 32.92 | 64.31  | 49.34 | 34.35 | 49.42 | 59.35 |
| CLI 13.3+FUS 38+STR 8.47 |       |       |        |       |       |       |       |
| Median (n=16)            | 85.73 | 68.43 | 57.18  | 52.71 | 50.17 | 50.71 | 47.29 |
| Max                      | 93.78 | 95.37 | 77.02  | 58.40 | 66.01 | 66.73 | 50.64 |
| Min                      | 82.45 | 32.92 | 42.55  | 49.34 | 28.12 | 39.23 | 30.29 |
| CLI 13.3+FUS 38+TMP 0.35 |       |       |        |       |       |       |       |
| Median (n=16)            | 85.73 | 68.43 | 80.68  | 52.71 | 65.29 | 46.93 | 48.94 |
| Max                      | 93.78 | 95.37 | 95.28  | 58.40 | 76.70 | 65.37 | 58.71 |
| Min                      | 82.45 | 32.92 | 69.35  | 49.34 | 51.25 | 7.87  | 44.07 |

|                            |        |       |       |       |       |       |       |
|----------------------------|--------|-------|-------|-------|-------|-------|-------|
| ERY 3.62+FOX 2.25+STR 8.47 |        |       |       |       |       |       |       |
| Median (n=16)              | 102.45 | 80.36 | 57.18 | 62.01 | 55.73 | 30.49 | 18.63 |
| Max                        | 112.12 | 94.71 | 77.02 | 71.19 | 64.57 | 48.88 | 29.28 |
| Min                        | 92.26  | 35.04 | 42.55 | 51.25 | 34.13 | -5.18 | 11.04 |
| ERY 3.62+FOX 2.25+TMP 0.35 |        |       |       |       |       |       |       |
| Median (n=8)               | 102.45 | 80.36 | 80.68 | 62.01 | 80.64 | 77.11 | 73.31 |
| Max                        | 112.12 | 94.71 | 95.28 | 71.19 | 90.64 | 85.42 | 81.23 |
| Min                        | 92.26  | 35.04 | 69.35 | 51.25 | 28.20 | 38.63 | 64.26 |
| ERY 3.62+FOX 2.25+TOB 4.1  |        |       |       |       |       |       |       |
| Median (n=32)              | 102.45 | 80.36 | 71.10 | 62.01 | 76.22 | 34.80 | 29.69 |
| Max                        | 112.12 | 94.71 | 84.19 | 71.19 | 84.26 | 37.59 | 38.07 |
| Min                        | 92.26  | 35.04 | 24.81 | 51.25 | 69.30 | 31.22 | 26.31 |
| ERY 3.62+FOX 2.25+VAN 80   |        |       |       |       |       |       |       |
| Median (n=32)              | 102.45 | 80.36 | 55.55 | 62.01 | 71.42 | 19.46 | 34.69 |
| Max                        | 112.12 | 94.71 | 69.28 | 71.19 | 75.27 | 63.31 | 38.01 |
| Min                        | 92.26  | 35.04 | 22.28 | 51.25 | 29.07 | -6.12 | 29.25 |
| CHL 88.4+FUS 38+GEN 4.4    |        |       |       |       |       |       |       |
| Median (n=16)              | 79.93  | 68.42 | 73.83 | 48.88 | 66.50 | 50.98 | 40.40 |
| Max                        | 89.78  | 95.37 | 86.03 | 52.19 | 69.73 | 61.69 | 50.19 |



|                          |       |       |        |       |       |       |       |
|--------------------------|-------|-------|--------|-------|-------|-------|-------|
| Min                      | 76.34 | 32.92 | 60.41  | 44.28 | 38.56 | 41.91 | 34.10 |
| CHL 88.4+FUS 38+NTR 16.5 |       |       |        |       |       |       |       |
| Median (n=16)            | 79.93 | 68.42 | 77.44  | 48.88 | 63.48 | 72.18 | 46.71 |
| Max                      | 89.78 | 95.37 | 103.36 | 52.19 | 69.02 | 80.76 | 58.33 |
| Min                      | 76.34 | 32.92 | 64.31  | 44.28 | 61.83 | 49.42 | 33.92 |
| CHL 88.4+FUS 38+STR 8.47 |       |       |        |       |       |       |       |
| Median (n=16)            | 79.93 | 68.42 | 57.18  | 48.88 | 57.68 | 50.71 | 24.68 |
| Max                      | 89.78 | 95.37 | 77.02  | 52.19 | 65.61 | 66.73 | 28.94 |
| Min                      | 76.34 | 32.92 | 42.55  | 44.28 | 44.75 | 39.23 | 19.71 |
| CHL 88.4+FUS 38+TMP 0.35 |       |       |        |       |       |       |       |
| Median (n=16)            | 79.93 | 68.42 | 80.68  | 48.88 | 64.13 | 46.93 | 40.10 |
| Max                      | 89.78 | 95.37 | 95.28  | 52.19 | 70.64 | 65.37 | 46.13 |
| Min                      | 76.34 | 32.92 | 69.35  | 44.28 | 55.75 | 7.87  | 35.13 |
| CHL 88.4+FUS 38+TOB 4.1  |       |       |        |       |       |       |       |
| Median (n=32)            | 79.93 | 68.42 | 71.10  | 48.88 | 73.13 | 61.10 | 38.48 |
| Max                      | 89.78 | 95.37 | 84.19  | 52.19 | 90.95 | 65.07 | 47.92 |
| Min                      | 76.34 | 32.92 | 24.81  | 44.28 | 41.54 | 44.23 | 36.48 |
| CHL 88.4+FUS 38+VAN 80   |       |       |        |       |       |       |       |
| Median (n=32)            | 79.93 | 68.42 | 55.55  | 48.88 | 56.42 | 33.16 | 2.80  |

|                          |        |       |        |       |       |        |       |
|--------------------------|--------|-------|--------|-------|-------|--------|-------|
| Max                      | 89.78  | 95.37 | 69.28  | 52.19 | 64.37 | 37.55  | 6.44  |
| Min                      | 76.34  | 32.92 | 22.28  | 44.28 | 38.52 | -11.89 | -2.89 |
| ERY 3.62+FUS 38+GEN 4.4  |        |       |        |       |       |        |       |
| Median (n=16)            | 102.45 | 68.42 | 73.83  | 52.31 | 67.28 | 50.98  | 59.48 |
| Max                      | 112.12 | 95.37 | 86.03  | 65.73 | 78.35 | 61.69  | 64.88 |
| Min                      | 92.26  | 32.92 | 60.41  | 36.58 | 21.17 | 41.91  | 48.20 |
| ERY 3.62+FUS 38+NTR 16.5 |        |       |        |       |       |        |       |
| Median (n=16)            | 102.45 | 68.42 | 77.44  | 52.31 | 84.06 | 72.18  | 64.53 |
| Max                      | 112.12 | 95.37 | 103.36 | 65.73 | 87.25 | 80.76  | 82.53 |
| Min                      | 92.26  | 32.92 | 64.31  | 36.58 | 79.31 | 49.42  | 50.40 |
| ERY 3.62+FUS 38+STR 8.47 |        |       |        |       |       |        |       |
| Median (n=16)            | 102.45 | 68.42 | 57.18  | 52.31 | 55.73 | 50.71  | 51.15 |
| Max                      | 112.12 | 95.37 | 77.02  | 65.73 | 64.57 | 66.73  | 58.06 |
| Min                      | 92.26  | 32.92 | 42.55  | 36.58 | 34.13 | 39.23  | 42.18 |
| ERY 3.62+FUS 38+TMP 0.35 |        |       |        |       |       |        |       |
| Median (n=16)            | 102.45 | 68.42 | 80.68  | 52.31 | 80.64 | 46.93  | 46.24 |
| Max                      | 112.12 | 95.37 | 95.28  | 65.73 | 90.64 | 65.37  | 65.14 |
| Min                      | 92.26  | 32.92 | 69.35  | 36.58 | 28.20 | 7.87   | 17.25 |
| ERY 3.62+FUS 38+TOB 4.1  |        |       |        |       |       |        |       |

|                           |        |       |        |       |       |        |       |
|---------------------------|--------|-------|--------|-------|-------|--------|-------|
| Median (n=32)             | 102.45 | 68.42 | 71.10  | 52.31 | 76.22 | 61.10  | 61.02 |
| Max                       | 112.12 | 95.37 | 84.19  | 65.73 | 84.26 | 65.07  | 68.05 |
| Min                       | 92.26  | 32.92 | 24.81  | 36.58 | 69.30 | 44.23  | 49.29 |
| ERY 3.62+FUS 38+VAN 80    |        |       |        |       |       |        |       |
| Median (n=32)             | 102.45 | 68.42 | 55.55  | 52.31 | 71.42 | 33.16  | 28.44 |
| Max                       | 112.12 | 95.37 | 69.28  | 65.73 | 75.27 | 37.55  | 38.76 |
| Min                       | 92.26  | 32.92 | 22.28  | 36.58 | 29.07 | -11.89 | 20.26 |
| CHL 88.4+GEN 4.4+NTR 16.5 |        |       |        |       |       |        |       |
| Median (n=16)             | 79.93  | 73.83 | 77.44  | 66.50 | 63.48 | 59.31  | 53.72 |
| Max                       | 89.78  | 86.03 | 103.36 | 69.73 | 69.02 | 64.50  | 60.26 |
| Min                       | 76.34  | 60.41 | 64.31  | 38.56 | 61.83 | 51.01  | 43.72 |
| CHL 88.4+GEN 4.4+STR 8.47 |        |       |        |       |       |        |       |
| Median (n=16)             | 79.93  | 73.83 | 57.18  | 66.50 | 57.68 | 51.96  | 50.84 |
| Max                       | 89.78  | 86.03 | 77.02  | 69.73 | 65.61 | 66.18  | 62.21 |
| Min                       | 76.34  | 60.41 | 42.55  | 38.56 | 44.75 | 33.29  | 42.63 |
| CHL 88.4+GEN 4.4+TMP 0.35 |        |       |        |       |       |        |       |
| Median (n=16)             | 79.93  | 73.83 | 80.68  | 66.50 | 64.13 | 49.65  | 48.73 |
| Max                       | 89.78  | 86.03 | 95.28  | 69.73 | 70.64 | 72.97  | 62.78 |
| Min                       | 76.34  | 60.41 | 69.35  | 38.56 | 55.75 | 34.41  | 31.88 |

|                           |        |       |        |       |       |       |       |
|---------------------------|--------|-------|--------|-------|-------|-------|-------|
| CHL 88.4+GEN 4.4+TOB 4.1  |        |       |        |       |       |       |       |
| Median (n=32)             | 79.93  | 73.83 | 71.10  | 66.50 | 73.13 | 59.75 | 52.41 |
| Max                       | 89.78  | 86.03 | 84.19  | 69.73 | 90.95 | 76.66 | 59.22 |
| Min                       | 76.34  | 60.41 | 24.81  | 38.56 | 41.54 | 36.72 | 41.13 |
| CHL 88.4+GEN 4.4+VAN 80   |        |       |        |       |       |       |       |
| Median (n=32)             | 79.93  | 73.83 | 55.55  | 66.50 | 56.42 | 54.44 | 41.21 |
| Max                       | 89.78  | 86.03 | 69.28  | 69.73 | 64.37 | 68.70 | 51.65 |
| Min                       | 76.34  | 60.41 | 22.28  | 38.56 | 38.52 | 13.32 | 35.84 |
| ERY 3.62+GEN 4.4+NTR 16.5 |        |       |        |       |       |       |       |
| Median (n=16)             | 102.45 | 73.83 | 77.44  | 67.28 | 84.06 | 59.31 | 69.07 |
| Max                       | 112.12 | 86.03 | 103.36 | 78.35 | 87.25 | 64.50 | 76.87 |
| Min                       | 92.26  | 60.41 | 64.31  | 21.17 | 79.31 | 51.01 | 60.96 |
| ERY 3.62+GEN 4.4+STR 8.47 |        |       |        |       |       |       |       |
| Median (n=16)             | 102.45 | 73.83 | 57.18  | 67.28 | 55.73 | 51.96 | 57.37 |
| Max                       | 112.12 | 86.03 | 77.02  | 78.35 | 64.57 | 66.18 | 61.76 |
| Min                       | 92.26  | 60.41 | 42.55  | 21.17 | 34.13 | 33.29 | 52.99 |
| ERY 3.62+GEN 4.4+TMP 0.35 |        |       |        |       |       |       |       |
| Median (n=16)             | 102.45 | 73.83 | 80.68  | 67.28 | 80.64 | 49.65 | 57.61 |
| Max                       | 112.12 | 86.03 | 95.28  | 78.35 | 90.64 | 72.97 | 72.30 |

|                            |        |        |       |       |       |       |       |
|----------------------------|--------|--------|-------|-------|-------|-------|-------|
| Min                        | 92.26  | 60.41  | 69.35 | 21.17 | 28.20 | 34.41 | 35.26 |
| ERY 3.62+GEN 4.4+TOB 4.1   |        |        |       |       |       |       |       |
| Median (n=32)              | 102.45 | 73.83  | 71.10 | 67.28 | 76.22 | 59.75 | 52.56 |
| Max                        | 112.12 | 86.03  | 84.19 | 78.35 | 84.26 | 76.66 | 71.37 |
| Min                        | 92.26  | 60.41  | 24.81 | 21.17 | 69.30 | 36.72 | 18.86 |
| ERY 3.62+GEN 4.4+VAN 80    |        |        |       |       |       |       |       |
| Median (n=32)              | 102.45 | 73.83  | 55.55 | 67.28 | 71.42 | 54.44 | 45.85 |
| Max                        | 112.12 | 86.03  | 69.28 | 78.35 | 75.27 | 68.70 | 55.89 |
| Min                        | 92.26  | 60.41  | 22.28 | 21.17 | 29.07 | 13.32 | 31.49 |
| CHL 88.4+NTR 16.5+STR 8.47 |        |        |       |       |       |       |       |
| Median (n=16)              | 79.93  | 77.44  | 57.18 | 63.48 | 57.68 | -1.04 | 7.52  |
| Max                        | 89.78  | 103.36 | 77.02 | 69.02 | 65.61 | 6.07  | 11.70 |
| Min                        | 76.34  | 64.31  | 42.55 | 61.83 | 44.75 | -5.76 | 0.53  |
| CHL 88.4+NTR 16.5+TMP 0.35 |        |        |       |       |       |       |       |
| Median (n=16)              | 79.93  | 77.44  | 80.68 | 63.48 | 64.13 | 59.58 | 54.17 |
| Max                        | 89.78  | 103.36 | 95.28 | 69.02 | 70.64 | 76.21 | 61.40 |
| Min                        | 76.34  | 64.31  | 69.35 | 61.83 | 55.75 | 39.33 | 47.40 |
| CHL 88.4+NTR 16.5+TOB 4.1  |        |        |       |       |       |       |       |
| Median (n=32)              | 79.93  | 77.44  | 71.10 | 63.48 | 73.13 | 62.07 | 43.82 |

|                            |        |        |       |       |       |       |        |
|----------------------------|--------|--------|-------|-------|-------|-------|--------|
| Max                        | 89.78  | 103.36 | 84.19 | 69.02 | 90.95 | 71.72 | 58.19  |
| Min                        | 76.34  | 64.31  | 24.81 | 61.83 | 41.54 | 52.22 | 24.02  |
| CHL 88.4+NTR 16.5+VAN 80   |        |        |       |       |       |       |        |
| Median (n=32)              | 79.93  | 77.44  | 55.55 | 63.48 | 56.42 | 4.46  | 6.46   |
| Max                        | 89.78  | 103.36 | 69.28 | 69.02 | 64.37 | 7.53  | 17.22  |
| Min                        | 76.34  | 64.31  | 22.28 | 61.83 | 38.52 | 1.83  | -10.51 |
| ERY 3.62+NTR 16.5+STR 8.47 |        |        |       |       |       |       |        |
| Median (n=16)              | 102.45 | 77.44  | 57.18 | 84.06 | 55.73 | -1.04 | 6.93   |
| Max                        | 112.12 | 103.36 | 77.02 | 87.25 | 64.57 | 6.07  | 11.29  |
| Min                        | 92.26  | 64.31  | 42.55 | 79.31 | 34.13 | -5.76 | -1.05  |
| ERY 3.62+NTR 16.5+TMP 0.35 |        |        |       |       |       |       |        |
| Median (n=16)              | 102.45 | 77.44  | 80.68 | 84.06 | 80.64 | 59.58 | 64.89  |
| Max                        | 112.12 | 103.36 | 95.28 | 87.25 | 90.64 | 76.21 | 74.20  |
| Min                        | 92.26  | 64.31  | 69.35 | 79.31 | 28.20 | 39.33 | 34.79  |
| ERY 3.62+NTR 16.5+TOB 4.1  |        |        |       |       |       |       |        |
| Median (n=32)              | 102.45 | 77.44  | 71.10 | 84.06 | 76.22 | 62.07 | 67.63  |
| Max                        | 112.12 | 103.36 | 84.19 | 87.25 | 84.26 | 71.72 | 74.34  |
| Min                        | 92.26  | 64.31  | 24.81 | 79.31 | 69.30 | 52.22 | 51.57  |
| ERY 3.62+NTR 16.5+VAN 80   |        |        |       |       |       |       |        |

|                            |        |        |        |       |       |       |        |
|----------------------------|--------|--------|--------|-------|-------|-------|--------|
| Median (n=32)              | 102.45 | 77.44  | 55.55  | 84.06 | 71.42 | 4.46  | 0.99   |
| Max                        | 112.12 | 103.36 | 69.28  | 87.25 | 75.27 | 7.53  | 11.99  |
| Min                        | 92.26  | 64.31  | 22.28  | 79.31 | 29.07 | 1.83  | -16.03 |
| CLI 13.3+CPR 0.04+DOX 0.66 |        |        |        |       |       |       |        |
| Median (n=8)               | 85.73  | 68.75  | 66.74  | 48.51 | 55.62 | 40.45 | 47.44  |
| Max                        | 93.78  | 81.60  | 74.60  | 55.00 | 57.88 | 47.06 | 48.60  |
| Min                        | 82.45  | 61.44  | 59.94  | 45.35 | 33.60 | 25.69 | 33.64  |
| CLI 13.3+CPR 0.04+ERY 3.62 |        |        |        |       |       |       |        |
| Median (n=8)               | 85.73  | 68.75  | 102.45 | 48.51 | 80.27 | 63.47 | 48.26  |
| Max                        | 93.78  | 81.60  | 112.12 | 55.00 | 84.78 | 70.41 | 54.18  |
| Min                        | 82.45  | 61.44  | 92.26  | 45.35 | 74.41 | 59.44 | 42.76  |
| CLI 13.3+CPR 0.04+FOX 2.25 |        |        |        |       |       |       |        |
| Median (n=8)               | 85.73  | 68.75  | 80.36  | 48.51 | 28.68 | 28.68 | 19.24  |
| Max                        | 93.78  | 81.60  | 94.71  | 55.00 | 35.14 | 35.14 | 24.01  |
| Min                        | 82.45  | 61.44  | 35.04  | 45.35 | 23.57 | 23.57 | 12.48  |
| CLI 13.3+CPR 0.04+FUS 38   |        |        |        |       |       |       |        |
| Median (n=16)              | 85.73  | 68.75  | 68.42  | 48.51 | 52.71 | 61.41 | 43.19  |
| Max                        | 93.78  | 81.60  | 95.37  | 55.00 | 58.40 | 63.42 | 52.39  |
| Min                        | 82.45  | 61.44  | 32.92  | 45.35 | 49.34 | 55.16 | 24.12  |

|                               |       |       |        |       |       |       |       |
|-------------------------------|-------|-------|--------|-------|-------|-------|-------|
| CPR 0.04+DOX 0.66+NTR 16.5    |       |       |        |       |       |       |       |
| Median (n=16)                 | 68.75 | 66.74 | 77.44  | 40.45 | 40.46 | 53.09 | 41.60 |
| Max                           | 81.60 | 74.60 | 103.36 | 47.06 | 47.50 | 57.29 | 47.36 |
| Min                           | 61.44 | 59.94 | 64.31  | 25.69 | 34.96 | 40.44 | 29.14 |
| CPR 0.04+DOX 0.66+STR 8.47    |       |       |        |       |       |       |       |
| Median (n=16)                 | 68.75 | 66.74 | 57.18  | 40.45 | 46.40 | 21.72 | 15.51 |
| Max                           | 81.60 | 74.60 | 77.02  | 47.06 | 50.59 | 44.29 | 25.43 |
| Min                           | 61.44 | 59.94 | 42.55  | 25.69 | 32.43 | 6.56  | 8.37  |
| CPR 0.04+DOX 0.66+TMP<br>0.35 |       |       |        |       |       |       |       |
| Median (n=16)                 | 68.75 | 66.74 | 80.68  | 40.45 | 38.56 | 54.35 | 37.19 |
| Max                           | 81.60 | 74.60 | 95.28  | 47.06 | 50.13 | 70.73 | 41.69 |
| Min                           | 61.44 | 59.94 | 69.35  | 25.69 | 7.17  | 30.60 | 24.87 |
| CPR 0.04+DOX 0.66+TOB 4.1     |       |       |        |       |       |       |       |
| Median (n=32)                 | 68.75 | 66.74 | 71.10  | 40.45 | 56.65 | 54.27 | 39.14 |
| Max                           | 81.60 | 74.60 | 84.19  | 47.06 | 59.64 | 58.95 | 44.27 |
| Min                           | 61.44 | 59.94 | 24.81  | 25.69 | 7.91  | 36.63 | 25.10 |
| CPR 0.04+DOX 0.66+VAN 80      |       |       |        |       |       |       |       |
| Median (n=32)                 | 68.75 | 66.74 | 55.55  | 40.45 | 27.31 | 11.12 | 2.15  |



|                               |       |        |       |       |        |        |       |
|-------------------------------|-------|--------|-------|-------|--------|--------|-------|
| Max                           | 81.60 | 74.60  | 69.28 | 47.06 | 35.95  | 18.14  | 10.06 |
| Min                           | 61.44 | 59.94  | 22.28 | 25.69 | 7.10   | -12.51 | -7.79 |
| DOX 0.66+NTR 16.5+STR 8.47    |       |        |       |       |        |        |       |
| Median (n=16)                 | 66.74 | 77.44  | 57.18 | 53.09 | 21.72  | -1.04  | 5.08  |
| Max                           | 74.60 | 103.36 | 77.02 | 57.29 | 44.29  | 6.07   | 20.03 |
| Min                           | 59.94 | 64.31  | 42.55 | 40.44 | 6.56   | -5.76  | 0.71  |
| DOX 0.66+NTR 16.5+TMP<br>0.35 |       |        |       |       |        |        |       |
| Median (n=16)                 | 66.74 | 77.44  | 80.68 | 53.09 | 54.35  | 59.58  | 47.41 |
| Max                           | 74.60 | 103.36 | 95.28 | 57.29 | 70.73  | 76.21  | 53.05 |
| Min                           | 59.94 | 64.31  | 69.35 | 40.44 | 30.60  | 39.33  | 37.43 |
| DOX 0.66+NTR 16.5+TOB 4.1     |       |        |       |       |        |        |       |
| Median (n=32)                 | 66.74 | 77.44  | 71.10 | 53.09 | 54.27  | 62.07  | 39.89 |
| Max                           | 74.60 | 103.36 | 84.19 | 57.29 | 58.95  | 71.72  | 50.39 |
| Min                           | 59.94 | 64.31  | 24.81 | 40.44 | 36.63  | 52.22  | 14.33 |
| DOX 0.66+NTR 16.5+VAN 80      |       |        |       |       |        |        |       |
| Median (n=32)                 | 66.74 | 77.44  | 55.55 | 53.09 | 11.12  | 4.46   | 4.80  |
| Max                           | 74.60 | 103.36 | 69.28 | 57.29 | 18.14  | 7.53   | 13.05 |
| Min                           | 59.94 | 64.31  | 22.28 | 40.44 | -12.51 | 1.83   | -5.36 |

|                                   |       |       |        |       |       |        |       |
|-----------------------------------|-------|-------|--------|-------|-------|--------|-------|
| <b>FUS 38+GEN 4.4+NTR 16.5</b>    |       |       |        |       |       |        |       |
| Median (n=16)                     | 68.42 | 73.83 | 77.44  | 50.98 | 72.18 | 59.31  | 58.87 |
| Max                               | 95.37 | 86.03 | 103.36 | 61.69 | 80.76 | 64.50  | 70.44 |
| Min                               | 32.92 | 60.41 | 64.31  | 41.91 | 49.42 | 51.01  | 47.74 |
| <b>CLI 13.3+FUS 38+TOB 4.1</b>    |       |       |        |       |       |        |       |
| Median (n=32)                     | 85.73 | 68.42 | 71.10  | 52.71 | 64.55 | 61.10  | 47.22 |
| Max                               | 93.78 | 95.37 | 84.19  | 58.40 | 70.55 | 65.07  | 55.95 |
| Min                               | 82.45 | 32.92 | 24.81  | 49.34 | 42.49 | 44.23  | 32.35 |
| <b>CLI 13.3+FUS 38+VAN 80</b>     |       |       |        |       |       |        |       |
| Median (n=32)                     | 85.73 | 68.42 | 55.55  | 52.71 | 54.43 | 33.16  | 24.14 |
| Max                               | 93.78 | 95.37 | 69.28  | 58.40 | 62.33 | 37.55  | 34.78 |
| Min                               | 82.45 | 32.92 | 22.28  | 49.34 | 10.37 | -11.89 | 18.68 |
| <b>CLI 13.3+DOX 0.66+ERY 3.62</b> |       |       |        |       |       |        |       |
| Median (n=16)                     | 85.73 | 66.74 | 102.45 | 55.62 | 80.27 | 38.07  | 60.25 |
| Max                               | 93.78 | 74.60 | 112.12 | 57.88 | 84.78 | 53.96  | 71.77 |
| Min                               | 82.45 | 59.94 | 92.26  | 33.60 | 74.41 | 32.72  | 43.81 |
| <b>CLI 13.3+DOX 0.66+FOX 2.25</b> |       |       |        |       |       |        |       |
| Median (n=16)                     | 85.73 | 66.74 | 80.36  | 55.62 | 55.83 | 14.61  | 26.70 |
| Max                               | 93.78 | 74.60 | 94.71  | 57.88 | 65.15 | 22.40  | 48.38 |

|                            |       |       |        |       |       |       |       |
|----------------------------|-------|-------|--------|-------|-------|-------|-------|
| Min                        | 82.45 | 59.94 | 35.04  | 33.60 | 34.19 | 3.46  | 11.95 |
| CLI 13.3+DOX 0.66+FUS 38   |       |       |        |       |       |       |       |
| Median (n=16)              | 85.73 | 66.74 | 68.42  | 55.62 | 52.71 | 21.11 | 37.21 |
| Max                        | 93.78 | 74.60 | 95.37  | 57.88 | 58.40 | 27.77 | 42.32 |
| Min                        | 82.45 | 59.94 | 32.92  | 33.60 | 49.34 | 4.66  | 27.58 |
| CLI 13.3+DOX 0.66+GEN 4.4  |       |       |        |       |       |       |       |
| Median (n=16)              | 85.73 | 66.74 | 73.83  | 55.62 | 52.38 | 47.29 | 50.31 |
| Max                        | 93.78 | 74.60 | 86.03  | 57.88 | 62.10 | 52.81 | 57.44 |
| Min                        | 82.45 | 59.94 | 60.41  | 33.60 | 38.88 | 42.22 | 26.08 |
| CLI 13.3+DOX 0.66+NTR 16.5 |       |       |        |       |       |       |       |
| Median (n=16)              | 85.73 | 66.74 | 77.44  | 55.62 | 65.25 | 53.09 | 60.09 |
| Max                        | 93.78 | 74.60 | 103.36 | 57.88 | 82.74 | 57.29 | 65.49 |
| Min                        | 82.45 | 59.94 | 64.31  | 33.60 | 34.35 | 40.44 | 44.43 |
| CLI 13.3+DOX 0.66+STR 8.47 |       |       |        |       |       |       |       |
| Median (n=16)              | 85.73 | 66.74 | 57.18  | 55.62 | 50.17 | 21.72 | 40.04 |
| Max                        | 93.78 | 74.60 | 77.02  | 57.88 | 66.01 | 44.29 | 46.34 |
| Min                        | 82.45 | 59.94 | 42.55  | 33.60 | 28.12 | 6.56  | 36.47 |
| CLI 13.3+DOX 0.66+TMP 0.35 |       |       |        |       |       |       |       |
| Median (n=16)              | 85.73 | 66.74 | 80.68  | 55.62 | 65.29 | 54.35 | 52.05 |

|                           |       |       |        |       |       |        |       |
|---------------------------|-------|-------|--------|-------|-------|--------|-------|
| Max                       | 93.78 | 74.60 | 95.28  | 57.88 | 76.70 | 70.73  | 60.66 |
| Min                       | 82.45 | 59.94 | 69.35  | 33.60 | 51.25 | 30.60  | 33.02 |
| CLI 13.3+DOX 0.66+TOB 4.1 |       |       |        |       |       |        |       |
| Median (n=32)             | 85.73 | 66.74 | 71.10  | 55.62 | 64.55 | 54.27  | 49.02 |
| Max                       | 93.78 | 74.60 | 84.19  | 57.88 | 70.55 | 58.95  | 53.29 |
| Min                       | 82.45 | 59.94 | 24.81  | 33.60 | 42.49 | 36.63  | 24.09 |
| CLI 13.3+DOX 0.66+VAN 80  |       |       |        |       |       |        |       |
| Median (n=32)             | 85.73 | 66.74 | 55.55  | 55.62 | 54.43 | 11.12  | 18.86 |
| Max                       | 93.78 | 74.60 | 69.28  | 57.88 | 62.33 | 18.14  | 31.49 |
| Min                       | 82.45 | 59.94 | 22.28  | 33.60 | 10.37 | -12.51 | 3.75  |
| CLI 13.3+GEN 4.4+NTR 16.5 |       |       |        |       |       |        |       |
| Median (n=16)             | 85.73 | 73.83 | 77.44  | 52.38 | 65.25 | 59.31  | 66.44 |
| Max                       | 93.78 | 86.03 | 103.36 | 62.10 | 82.74 | 64.50  | 72.90 |
| Min                       | 82.45 | 60.41 | 64.31  | 38.88 | 34.35 | 51.01  | 31.84 |
| CLI 13.3+GEN 4.4+STR 8.47 |       |       |        |       |       |        |       |
| Median (n=16)             | 85.73 | 73.83 | 57.18  | 52.38 | 50.17 | 51.96  | 53.68 |
| Max                       | 93.78 | 86.03 | 77.02  | 62.10 | 66.01 | 66.18  | 66.78 |
| Min                       | 82.45 | 60.41 | 42.55  | 38.88 | 28.12 | 33.29  | 36.63 |
| CLI 13.3+GEN 4.4+TMP 0.35 |       |       |        |       |       |        |       |

|                            |       |        |       |       |       |       |       |
|----------------------------|-------|--------|-------|-------|-------|-------|-------|
| Median (n=16)              | 85.73 | 73.83  | 80.68 | 52.38 | 65.29 | 49.65 | 62.12 |
| Max                        | 93.78 | 86.03  | 95.28 | 62.10 | 76.70 | 72.97 | 66.20 |
| Min                        | 82.45 | 60.41  | 69.35 | 38.88 | 51.25 | 34.41 | 51.10 |
| CLI 13.3+GEN 4.4+TOB 4.1   |       |        |       |       |       |       |       |
| Median (n=32)              | 85.73 | 73.83  | 71.10 | 52.38 | 64.55 | 59.75 | 54.63 |
| Max                        | 93.78 | 86.03  | 84.19 | 62.10 | 70.55 | 76.66 | 59.21 |
| Min                        | 82.45 | 60.41  | 24.81 | 38.88 | 42.49 | 36.72 | 29.39 |
| CLI 13.3+GEN 4.4+VAN 80    |       |        |       |       |       |       |       |
| Median (n=32)              | 85.73 | 73.83  | 55.55 | 52.38 | 54.43 | 54.44 | 35.94 |
| Max                        | 93.78 | 86.03  | 69.28 | 62.10 | 62.33 | 68.70 | 46.67 |
| Min                        | 82.45 | 60.41  | 22.28 | 38.88 | 10.37 | 13.32 | 10.17 |
| CLI 13.3+ERY 3.62+FOX 2.25 |       |        |       |       |       |       |       |
| Median (n=16)              | 85.73 | 102.45 | 80.36 | 80.27 | 55.83 | 62.01 | 51.48 |
| Max                        | 93.78 | 112.12 | 94.71 | 84.78 | 65.15 | 71.19 | 65.07 |
| Min                        | 82.45 | 92.26  | 35.04 | 74.41 | 34.19 | 51.25 | 36.59 |
| CLI 13.3+ERY 3.62+FUS 38   |       |        |       |       |       |       |       |
| Median (n=16)              | 85.73 | 102.45 | 68.42 | 80.27 | 52.71 | 52.31 | 66.21 |
| Max                        | 93.78 | 112.12 | 95.37 | 84.78 | 58.40 | 65.73 | 72.97 |
| Min                        | 82.45 | 92.26  | 32.92 | 74.41 | 49.34 | 36.58 | 36.12 |

|                            |       |        |        |       |       |       |       |
|----------------------------|-------|--------|--------|-------|-------|-------|-------|
| CLI 13.3+ERY 3.62+GEN 4.4  |       |        |        |       |       |       |       |
| Median (n=16)              | 85.73 | 102.45 | 73.83  | 80.27 | 52.38 | 67.28 | 66.01 |
| Max                        | 93.78 | 112.12 | 86.03  | 84.78 | 62.10 | 78.35 | 74.12 |
| Min                        | 82.45 | 92.26  | 60.41  | 74.41 | 38.88 | 21.17 | 48.42 |
| CLI 13.3+ERY 3.62+NTR 16.5 |       |        |        |       |       |       |       |
| Median (n=16)              | 85.73 | 102.45 | 77.44  | 80.27 | 65.25 | 84.06 | 71.83 |
| Max                        | 93.78 | 112.12 | 103.36 | 84.78 | 82.74 | 87.25 | 86.32 |
| Min                        | 82.45 | 92.26  | 64.31  | 74.41 | 34.35 | 79.31 | 39.96 |
| CLI 13.3+ERY 3.62+STR 8.47 |       |        |        |       |       |       |       |
| Median (n=16)              | 85.73 | 102.45 | 57.18  | 80.27 | 50.17 | 55.73 | 59.75 |
| Max                        | 93.78 | 112.12 | 77.02  | 84.78 | 66.01 | 64.57 | 65.41 |
| Min                        | 82.45 | 92.26  | 42.55  | 74.41 | 28.12 | 34.13 | 33.51 |
| CLI 13.3+ERY 3.62+TMP 0.35 |       |        |        |       |       |       |       |
| Median (n=8)               | 85.73 | 102.45 | 80.68  | 80.27 | 65.29 | 80.64 | 74.52 |
| Max                        | 93.78 | 112.12 | 95.28  | 84.78 | 76.70 | 90.64 | 89.47 |
| Min                        | 82.45 | 92.26  | 69.35  | 74.41 | 51.25 | 28.20 | 66.01 |
| CLI 13.3+ERY 3.62+TOB 4.1  |       |        |        |       |       |       |       |
| Median (n=32)              | 85.73 | 102.45 | 71.10  | 80.27 | 64.55 | 76.22 | 66.75 |
| Max                        | 93.78 | 112.12 | 84.19  | 84.78 | 70.55 | 84.26 | 84.75 |

|                            |       |        |       |       |       |       |       |
|----------------------------|-------|--------|-------|-------|-------|-------|-------|
| Min                        | 82.45 | 92.26  | 24.81 | 74.41 | 42.49 | 69.30 | 59.22 |
| CLI 13.3+ERY 3.62+VAN 80   |       |        |       |       |       |       |       |
| Median (n=32)              | 85.73 | 102.45 | 55.55 | 80.27 | 54.43 | 71.42 | 51.55 |
| Max                        | 93.78 | 112.12 | 69.28 | 84.78 | 62.33 | 75.27 | 56.01 |
| Min                        | 82.45 | 92.26  | 22.28 | 74.41 | 10.37 | 29.07 | 32.75 |
| CLI 13.3+NTR 16.5+STR 8.47 |       |        |       |       |       |       |       |
| Median (n=16)              | 85.73 | 77.44  | 57.18 | 65.25 | 50.17 | -1.04 | 5.61  |
| Max                        | 93.78 | 103.36 | 77.02 | 82.74 | 66.01 | 6.07  | 12.88 |
| Min                        | 82.45 | 64.31  | 42.55 | 34.35 | 28.12 | -5.76 | -8.12 |
| CLI 13.3+NTR 16.5+TMP 0.35 |       |        |       |       |       |       |       |
| Median (n=16)              | 85.73 | 77.44  | 80.68 | 65.25 | 65.29 | 59.58 | 56.86 |
| Max                        | 93.78 | 103.36 | 95.28 | 82.74 | 76.70 | 76.21 | 64.42 |
| Min                        | 82.45 | 64.31  | 69.35 | 34.35 | 51.25 | 39.33 | 22.72 |
| CLI 13.3+NTR 16.5+TOB 4.1  |       |        |       |       |       |       |       |
| Median (n=32)              | 85.73 | 77.44  | 71.10 | 65.25 | 64.55 | 62.07 | 66.49 |
| Max                        | 93.78 | 103.36 | 84.19 | 82.74 | 70.55 | 71.72 | 73.58 |
| Min                        | 82.45 | 64.31  | 24.81 | 34.35 | 42.49 | 52.22 | 47.13 |
| CLI 13.3+NTR 16.5+VAN 80   |       |        |       |       |       |       |       |
| Median (n=32)              | 85.73 | 77.44  | 55.55 | 65.25 | 54.43 | 4.46  | 6.11  |

|                            |       |        |        |       |       |       |        |
|----------------------------|-------|--------|--------|-------|-------|-------|--------|
| Max                        | 93.78 | 103.36 | 69.28  | 82.74 | 62.33 | 7.53  | 13.23  |
| Min                        | 82.45 | 64.31  | 22.28  | 34.35 | 10.37 | 1.83  | -12.29 |
| CLI 13.3+FOX 2.25+FUS 38   |       |        |        |       |       |       |        |
| Median (n=16)              | 85.73 | 80.36  | 68.42  | 55.83 | 52.71 | 19.20 | 40.46  |
| Max                        | 93.78 | 94.71  | 95.37  | 65.15 | 58.40 | 40.44 | 47.98  |
| Min                        | 82.45 | 35.04  | 32.92  | 34.19 | 49.34 | 12.82 | 33.62  |
| CLI 13.3+FOX 2.25+GEN 4.4  |       |        |        |       |       |       |        |
| Median (n=16)              | 85.73 | 80.36  | 73.83  | 55.83 | 52.38 | 29.60 | 42.14  |
| Max                        | 93.78 | 94.71  | 86.03  | 65.15 | 62.10 | 33.33 | 51.26  |
| Min                        | 82.45 | 35.04  | 60.41  | 34.19 | 38.88 | 25.33 | 26.20  |
| CLI 13.3+FOX 2.25+NTR 16.5 |       |        |        |       |       |       |        |
| Median (n=16)              | 85.73 | 80.36  | 77.44  | 55.83 | 65.25 | 46.66 | 42.24  |
| Max                        | 93.78 | 94.71  | 103.36 | 65.15 | 82.74 | 57.85 | 49.86  |
| Min                        | 82.45 | 35.04  | 64.31  | 34.19 | 34.35 | 34.72 | 38.97  |
| CLI 13.3+FOX 2.25+STR 8.47 |       |        |        |       |       |       |        |
| Median (n=16)              | 85.73 | 80.36  | 57.18  | 55.83 | 50.17 | 30.49 | 30.78  |
| Max                        | 93.78 | 94.71  | 77.02  | 65.15 | 66.01 | 48.88 | 41.78  |
| Min                        | 82.45 | 35.04  | 42.55  | 34.19 | 28.12 | -5.18 | -7.02  |
| CLI 13.3+FOX 2.25+TMP 0.35 |       |        |        |       |       |       |        |



|                            |       |       |       |       |       |       |       |
|----------------------------|-------|-------|-------|-------|-------|-------|-------|
| Median (n=8)               | 85.73 | 80.36 | 80.68 | 55.83 | 65.29 | 77.11 | 68.41 |
| Max                        | 93.78 | 94.71 | 95.28 | 65.15 | 76.70 | 85.42 | 72.35 |
| Min                        | 82.45 | 35.04 | 69.35 | 34.19 | 51.25 | 38.63 | 56.09 |
| CLI 13.3+FOX 2.25+TOB 4.1  |       |       |       |       |       |       |       |
| Median (n=32)              | 85.73 | 80.36 | 71.10 | 55.83 | 64.55 | 34.80 | 33.90 |
| Max                        | 93.78 | 94.71 | 84.19 | 65.15 | 70.55 | 37.59 | 39.92 |
| Min                        | 82.45 | 35.04 | 24.81 | 34.19 | 42.49 | 31.22 | 22.03 |
| CLI 13.3+FOX 2.25+VAN 80   |       |       |       |       |       |       |       |
| Median (n=32)              | 85.73 | 80.36 | 55.55 | 55.83 | 54.43 | 19.46 | 27.06 |
| Max                        | 93.78 | 94.71 | 69.28 | 65.15 | 62.33 | 63.31 | 36.40 |
| Min                        | 82.45 | 35.04 | 22.28 | 34.19 | 10.37 | -6.12 | 9.59  |
| CLI 13.3+STR 8.47+TMP 0.35 |       |       |       |       |       |       |       |
| Median (n=16)              | 85.73 | 57.18 | 80.68 | 50.17 | 65.29 | 46.20 | 54.70 |
| Max                        | 93.78 | 77.02 | 95.28 | 66.01 | 76.70 | 59.14 | 56.62 |
| Min                        | 82.45 | 42.55 | 69.35 | 28.12 | 51.25 | 39.27 | 42.28 |
| CLI 13.3+STR 8.47+TOB 4.1  |       |       |       |       |       |       |       |
| Median (n=32)              | 85.73 | 57.18 | 71.10 | 50.17 | 64.55 | 56.45 | 50.32 |
| Max                        | 93.78 | 77.02 | 84.19 | 66.01 | 70.55 | 65.02 | 60.97 |
| Min                        | 82.45 | 42.55 | 24.81 | 28.12 | 42.49 | 50.40 | 12.76 |

|                          |       |       |        |       |       |       |       |
|--------------------------|-------|-------|--------|-------|-------|-------|-------|
| CLI 13.3+STR 8.47+VAN 80 |       |       |        |       |       |       |       |
| Median (n=32)            | 85.73 | 57.18 | 55.55  | 50.17 | 54.43 | 35.57 | 32.52 |
| Max                      | 93.78 | 77.02 | 69.28  | 66.01 | 62.33 | 39.85 | 49.11 |
| Min                      | 82.45 | 42.55 | 22.28  | 28.12 | 10.37 | 10.50 | 9.73  |
| FOX 2.25+FUS 38+GEN 4.4  |       |       |        |       |       |       |       |
| Median (n=16)            | 80.36 | 68.42 | 73.83  | 19.20 | 29.60 | 50.98 | 15.31 |
| Max                      | 94.71 | 95.37 | 86.03  | 40.44 | 33.33 | 61.69 | 34.25 |
| Min                      | 35.04 | 32.92 | 60.41  | 12.82 | 25.33 | 41.91 | 5.15  |
| FOX 2.25+FUS 38+NTR 16.5 |       |       |        |       |       |       |       |
| Median (n=16)            | 80.36 | 68.42 | 77.44  | 19.20 | 46.66 | 72.18 | 21.80 |
| Max                      | 94.71 | 95.37 | 103.36 | 40.44 | 57.85 | 80.76 | 28.02 |
| Min                      | 35.04 | 32.92 | 64.31  | 12.82 | 34.72 | 49.42 | 19.39 |
| FOX 2.25+FUS 38+STR 8.47 |       |       |        |       |       |       |       |
| Median (n=16)            | 80.36 | 68.42 | 57.18  | 19.20 | 30.49 | 50.71 | 8.60  |
| Max                      | 94.71 | 95.37 | 77.02  | 40.44 | 48.88 | 66.73 | 21.35 |
| Min                      | 35.04 | 32.92 | 42.55  | 12.82 | -5.18 | 39.23 | -6.94 |
| FOX 2.25+FUS 38+TMP 0.35 |       |       |        |       |       |       |       |
| Median (n=16)            | 80.36 | 68.42 | 80.68  | 19.20 | 77.11 | 46.93 | 30.96 |
| Max                      | 94.71 | 95.37 | 95.28  | 40.44 | 85.42 | 65.37 | 34.27 |

|                            |        |       |       |       |       |       |       |
|----------------------------|--------|-------|-------|-------|-------|-------|-------|
| Min                        | 35.04  | 32.92 | 69.35 | 12.82 | 38.63 | 7.87  | 7.54  |
| ERY 3.62+STR 8.47+TMP 0.35 |        |       |       |       |       |       |       |
| Median (n=16)              | 102.45 | 57.18 | 80.68 | 55.73 | 80.64 | 46.20 | 41.14 |
| Max                        | 112.12 | 77.02 | 95.28 | 64.57 | 90.64 | 59.14 | 51.77 |
| Min                        | 92.26  | 42.55 | 69.35 | 34.13 | 28.20 | 39.27 | 25.67 |
| ERY 3.62+STR 8.47+TOB 4.1  |        |       |       |       |       |       |       |
| Median (n=32)              | 102.45 | 57.18 | 71.10 | 55.73 | 76.22 | 56.45 | 59.25 |
| Max                        | 112.12 | 77.02 | 84.19 | 64.57 | 84.26 | 65.02 | 65.20 |
| Min                        | 92.26  | 42.55 | 24.81 | 34.13 | 69.30 | 50.40 | 36.32 |
| ERY 3.62+STR 8.47+VAN 80   |        |       |       |       |       |       |       |
| Median (n=32)              | 102.45 | 57.18 | 55.55 | 55.73 | 71.42 | 35.57 | 39.68 |
| Max                        | 112.12 | 77.02 | 69.28 | 64.57 | 75.27 | 39.85 | 50.25 |
| Min                        | 92.26  | 42.55 | 22.28 | 34.13 | 29.07 | 10.50 | 19.88 |
| FOX 2.25+STR 8.47+TOB 4.1  |        |       |       |       |       |       |       |
| Median (n=32)              | 80.36  | 57.18 | 71.10 | 30.49 | 34.80 | 56.45 | 16.78 |
| Max                        | 94.71  | 77.02 | 84.19 | 48.88 | 37.59 | 65.02 | 36.62 |
| Min                        | 35.04  | 42.55 | 24.81 | -5.18 | 31.22 | 50.40 | 3.72  |
| FOX 2.25+STR 8.47+VAN 80   |        |       |       |       |       |       |       |
| Median (n=32)              | 80.36  | 57.18 | 55.55 | 30.49 | 19.46 | 35.57 | 16.81 |

|                           |       |       |        |       |       |       |        |
|---------------------------|-------|-------|--------|-------|-------|-------|--------|
| Max                       | 94.71 | 77.02 | 69.28  | 48.88 | 63.31 | 39.85 | 30.55  |
| Min                       | 35.04 | 42.55 | 22.28  | -5.18 | -6.12 | 10.50 | 0.18   |
| FOX 2.25+GEN 4.4+NTR 16.5 |       |       |        |       |       |       |        |
| Median (n=16)             | 80.36 | 73.83 | 77.44  | 29.60 | 46.66 | 59.31 | 28.00  |
| Max                       | 94.71 | 86.03 | 103.36 | 33.33 | 57.85 | 64.50 | 37.18  |
| Min                       | 35.04 | 60.41 | 64.31  | 25.33 | 34.72 | 51.01 | -7.54  |
| FOX 2.25+GEN 4.4+STR 8.47 |       |       |        |       |       |       |        |
| Median (n=16)             | 80.36 | 73.83 | 57.18  | 29.60 | 30.49 | 51.96 | 16.95  |
| Max                       | 94.71 | 86.03 | 77.02  | 33.33 | 48.88 | 66.18 | 36.35  |
| Min                       | 35.04 | 60.41 | 42.55  | 25.33 | -5.18 | 33.29 | -10.75 |
| FOX 2.25+GEN 4.4+TMP 0.35 |       |       |        |       |       |       |        |
| Median (n=16)             | 80.36 | 73.83 | 80.68  | 29.60 | 77.11 | 49.65 | 40.89  |
| Max                       | 94.71 | 86.03 | 95.28  | 33.33 | 85.42 | 72.97 | 46.45  |
| Min                       | 35.04 | 60.41 | 69.35  | 25.33 | 38.63 | 34.41 | 33.49  |
| FOX 2.25+GEN 4.4+TOB 4.1  |       |       |        |       |       |       |        |
| Median (n=32)             | 80.36 | 73.83 | 71.10  | 29.60 | 34.80 | 59.75 | 19.33  |
| Max                       | 94.71 | 86.03 | 84.19  | 33.33 | 37.59 | 76.66 | 23.85  |
| Min                       | 35.04 | 60.41 | 24.81  | 25.33 | 31.22 | 36.72 | 12.26  |
| FOX 2.25+GEN 4.4+VAN 80   |       |       |        |       |       |       |        |

|                            |        |       |       |       |       |       |       |
|----------------------------|--------|-------|-------|-------|-------|-------|-------|
| Median (n=32)              | 80.36  | 73.83 | 55.55 | 29.60 | 19.46 | 54.44 | 19.77 |
| Max                        | 94.71  | 86.03 | 69.28 | 33.33 | 63.31 | 68.70 | 26.21 |
| Min                        | 35.04  | 60.41 | 22.28 | 25.33 | -6.12 | 13.32 | 16.74 |
| GEN 4.4+STR 8.47+TMP 0.35  |        |       |       |       |       |       |       |
| Median (n=16)              | 73.83  | 57.18 | 80.68 | 51.96 | 49.65 | 46.20 | 43.60 |
| Max                        | 86.03  | 77.02 | 95.28 | 66.18 | 72.97 | 59.14 | 51.24 |
| Min                        | 60.41  | 42.55 | 69.35 | 33.29 | 34.41 | 39.27 | 36.16 |
| GEN 4.4+STR 8.47+TOB 4.1   |        |       |       |       |       |       |       |
| Median (n=32)              | 73.83  | 57.18 | 71.10 | 51.96 | 59.75 | 56.45 | 48.54 |
| Max                        | 86.03  | 77.02 | 84.19 | 66.18 | 76.66 | 65.02 | 58.85 |
| Min                        | 60.41  | 42.55 | 24.81 | 33.29 | 36.72 | 50.40 | 17.24 |
| GEN 4.4+STR 8.47+VAN 80    |        |       |       |       |       |       |       |
| Median (n=32)              | 73.83  | 57.18 | 55.55 | 51.96 | 54.44 | 35.57 | 31.90 |
| Max                        | 86.03  | 77.02 | 69.28 | 66.18 | 68.70 | 39.85 | 37.48 |
| Min                        | 60.41  | 42.55 | 22.28 | 33.29 | 13.32 | 10.50 | 26.25 |
| NTR 16.5+STR 8.47+TMP 0.35 |        |       |       |       |       |       |       |
| Median (n=16)              | 77.44  | 57.18 | 80.68 | -1.04 | 59.58 | 46.20 | 6.50  |
| Max                        | 103.36 | 77.02 | 95.28 | 6.07  | 76.21 | 59.14 | 13.03 |
| Min                        | 64.31  | 42.55 | 69.35 | -5.76 | 39.33 | 39.27 | 0.11  |

|                            |        |        |       |       |       |       |       |
|----------------------------|--------|--------|-------|-------|-------|-------|-------|
| NTR 16.5+STR 8.47+TOB 4.1  |        |        |       |       |       |       |       |
| Median (n=32)              | 77.44  | 57.18  | 71.10 | -1.04 | 62.07 | 56.45 | 5.71  |
| Max                        | 103.36 | 77.02  | 84.19 | 6.07  | 71.72 | 65.02 | 12.90 |
| Min                        | 64.31  | 42.55  | 24.81 | -5.76 | 52.22 | 50.40 | -3.05 |
| NTR 16.5+STR 8.47+VAN 80   |        |        |       |       |       |       |       |
| Median (n=32)              | 77.44  | 57.18  | 55.55 | -1.04 | 4.46  | 35.57 | 3.97  |
| Max                        | 103.36 | 77.02  | 69.28 | 6.07  | 7.53  | 39.85 | 8.04  |
| Min                        | 64.31  | 42.55  | 22.28 | -5.76 | 1.83  | 10.50 | -6.20 |
| FOX 2.25+NTR 16.5+STR 8.47 |        |        |       |       |       |       |       |
| Median (n=16)              | 80.36  | 77.44  | 57.18 | 46.66 | 30.49 | -1.04 | 7.30  |
| Max                        | 94.71  | 103.36 | 77.02 | 57.85 | 48.88 | 6.07  | 13.73 |
| Min                        | 35.04  | 64.31  | 42.55 | 34.72 | -5.18 | -5.76 | -4.93 |
| FOX 2.25+NTR 16.5+TMP 0.35 |        |        |       |       |       |       |       |
| Median (n=16)              | 80.36  | 77.44  | 80.68 | 46.66 | 77.11 | 59.58 | 31.93 |
| Max                        | 94.71  | 103.36 | 95.28 | 57.85 | 85.42 | 76.21 | 53.94 |
| Min                        | 35.04  | 64.31  | 69.35 | 34.72 | 38.63 | 39.33 | 15.32 |
| FOX 2.25+NTR 16.5+TOB 4.1  |        |        |       |       |       |       |       |
| Median (n=32)              | 80.36  | 77.44  | 71.10 | 46.66 | 34.80 | 62.07 | 25.57 |
| Max                        | 94.71  | 103.36 | 84.19 | 57.85 | 37.59 | 71.72 | 35.03 |

|                           |        |        |       |       |       |       |        |
|---------------------------|--------|--------|-------|-------|-------|-------|--------|
| Min                       | 35.04  | 64.31  | 24.81 | 34.72 | 31.22 | 52.22 | 15.28  |
| FOX 2.25+NTR 16.5+VAN 80  |        |        |       |       |       |       |        |
| Median (n=32)             | 80.36  | 77.44  | 55.55 | 46.66 | 19.46 | 4.46  | -2.34  |
| Max                       | 94.71  | 103.36 | 69.28 | 57.85 | 63.31 | 7.53  | 11.77  |
| Min                       | 35.04  | 64.31  | 22.28 | 34.72 | -6.12 | 1.83  | -19.74 |
| GEN 4.4+TMP 0.35+TOB 4.1  |        |        |       |       |       |       |        |
| Median (n=32)             | 73.83  | 80.68  | 71.10 | 49.65 | 59.75 | 49.81 | 51.05  |
| Max                       | 86.03  | 95.28  | 84.19 | 72.97 | 76.66 | 65.61 | 64.19  |
| Min                       | 60.41  | 69.35  | 24.81 | 34.41 | 36.72 | 10.01 | 34.38  |
| GEN 4.4+TMP 0.35+VAN 80   |        |        |       |       |       |       |        |
| Median (n=32)             | 73.83  | 80.68  | 55.55 | 49.65 | 54.44 | 32.45 | 23.12  |
| Max                       | 86.03  | 95.28  | 69.28 | 72.97 | 68.70 | 69.49 | 29.63  |
| Min                       | 60.41  | 69.35  | 22.28 | 34.41 | 13.32 | 23.81 | -8.76  |
| NTR 16.5+TMP 0.35+TOB 4.1 |        |        |       |       |       |       |        |
| Median (n=32)             | 77.44  | 80.68  | 71.10 | 59.58 | 62.07 | 49.81 | 53.33  |
| Max                       | 103.36 | 95.28  | 84.19 | 76.21 | 71.72 | 65.61 | 62.46  |
| Min                       | 64.31  | 69.35  | 24.81 | 39.33 | 52.22 | 10.01 | 38.52  |
| NTR 16.5+TMP 0.35+VAN 80  |        |        |       |       |       |       |        |
| Median (n=32)             | 77.44  | 80.68  | 55.55 | 59.58 | 4.46  | 32.45 | 10.28  |

|                            |        |       |       |       |       |       |       |
|----------------------------|--------|-------|-------|-------|-------|-------|-------|
| Max                        | 103.36 | 95.28 | 69.28 | 76.21 | 7.53  | 69.49 | 12.70 |
| Min                        | 64.31  | 69.35 | 22.28 | 39.33 | 1.83  | 23.81 | 4.91  |
| STR 8.47+TMP 0.35+TOB 4.1  |        |       |       |       |       |       |       |
| Median (n=32)              | 57.18  | 80.68 | 71.10 | 46.20 | 56.45 | 49.81 | 39.31 |
| Max                        | 77.02  | 95.28 | 84.19 | 59.14 | 65.02 | 65.61 | 50.34 |
| Min                        | 42.55  | 69.35 | 24.81 | 39.27 | 50.40 | 10.01 | 17.81 |
| STR 8.47+TMP 0.35+VAN 80   |        |       |       |       |       |       |       |
| Median (n=32)              | 57.18  | 80.68 | 55.55 | 46.20 | 35.57 | 32.45 | 21.87 |
| Max                        | 77.02  | 95.28 | 69.28 | 59.14 | 39.85 | 69.49 | 38.93 |
| Min                        | 42.55  | 69.35 | 22.28 | 39.27 | 10.50 | 23.81 | 3.54  |
| FOX 2.25+STR 8.47+TMP 0.35 |        |       |       |       |       |       |       |
| Median (n=16)              | 80.36  | 57.18 | 80.68 | 30.49 | 77.11 | 46.20 | 28.69 |
| Max                        | 94.71  | 77.02 | 95.28 | 48.88 | 85.42 | 59.14 | 51.21 |
| Min                        | 35.04  | 42.55 | 69.35 | -5.18 | 38.63 | 39.27 | 16.72 |
| GEN 4.4+TOB 4.1+VAN 80     |        |       |       |       |       |       |       |
| Median (n=32)              | 73.83  | 71.10 | 55.55 | 59.75 | 54.44 | 64.45 | 50.80 |
| Max                        | 86.03  | 84.19 | 69.28 | 76.66 | 68.70 | 69.76 | 57.28 |
| Min                        | 60.41  | 24.81 | 22.28 | 36.72 | 13.32 | 29.72 | 43.28 |
| NTR 16.5+TOB 4.1+VAN 80    |        |       |       |       |       |       |       |



|                            |        |       |       |       |       |       |       |
|----------------------------|--------|-------|-------|-------|-------|-------|-------|
| Median (n=32)              | 77.44  | 71.10 | 55.55 | 62.07 | 4.46  | 64.45 | 9.83  |
| Max                        | 103.36 | 84.19 | 69.28 | 71.72 | 7.53  | 69.76 | 15.05 |
| Min                        | 64.31  | 24.81 | 22.28 | 52.22 | 1.83  | 29.72 | 1.46  |
| STR 8.47+TOB 4.1+VAN 80    |        |       |       |       |       |       |       |
| Median (n=32)              | 57.18  | 71.10 | 55.55 | 56.45 | 35.57 | 64.45 | 43.40 |
| Max                        | 77.02  | 84.19 | 69.28 | 65.02 | 39.85 | 69.76 | 53.76 |
| Min                        | 42.55  | 24.81 | 22.28 | 50.40 | 10.50 | 29.72 | 37.03 |
| TMP 0.35+TOB 4.1+VAN 80    |        |       |       |       |       |       |       |
| Median (n=32)              | 80.68  | 71.10 | 55.55 | 49.81 | 32.45 | 64.45 | 39.31 |
| Max                        | 95.28  | 84.19 | 69.28 | 65.61 | 69.49 | 69.76 | 49.43 |
| Min                        | 69.35  | 24.81 | 22.28 | 10.01 | 23.81 | 29.72 | 10.32 |
| CHL 88.4+STR 8.47+TMP 0.35 |        |       |       |       |       |       |       |
| Median (n=16)              | 79.93  | 57.18 | 80.68 | 57.68 | 64.13 | 46.20 | 48.62 |
| Max                        | 89.78  | 77.02 | 95.28 | 65.61 | 70.64 | 59.14 | 57.98 |
| Min                        | 76.34  | 42.55 | 69.35 | 44.75 | 55.75 | 39.27 | 43.56 |
| CHL 88.4+STR 8.47+TOB 4.1  |        |       |       |       |       |       |       |
| Median (n=32)              | 79.93  | 57.18 | 71.10 | 57.68 | 73.13 | 56.45 | 48.17 |
| Max                        | 89.78  | 77.02 | 84.19 | 65.61 | 90.95 | 65.02 | 53.05 |
| Min                        | 76.34  | 42.55 | 24.81 | 44.75 | 41.54 | 50.40 | 42.61 |

|                           |       |       |       |       |        |       |        |
|---------------------------|-------|-------|-------|-------|--------|-------|--------|
| CHL 88.4+STR 8.47+VAN 80  |       |       |       |       |        |       |        |
| Median (n=32)             | 79.93 | 57.18 | 55.55 | 57.68 | 56.42  | 35.57 | 26.24  |
| Max                       | 89.78 | 77.02 | 69.28 | 65.61 | 64.37  | 39.85 | 31.31  |
| Min                       | 76.34 | 42.55 | 22.28 | 44.75 | 38.52  | 10.50 | 12.52  |
| FUS 38+STR 8.47+VAN 80    |       |       |       |       |        |       |        |
| Median (n=32)             | 68.42 | 57.18 | 55.55 | 50.71 | 33.16  | 35.57 | 5.99   |
| Max                       | 95.37 | 77.02 | 69.28 | 66.73 | 37.55  | 39.85 | 25.33  |
| Min                       | 32.92 | 42.55 | 22.28 | 39.23 | -11.89 | 10.50 | -14.49 |
| CHL 88.4+TMP 0.35+TOB 4.1 |       |       |       |       |        |       |        |
| Median (n=32)             | 79.93 | 80.68 | 71.10 | 64.13 | 73.13  | 49.81 | 55.10  |
| Max                       | 89.78 | 95.28 | 84.19 | 70.64 | 90.95  | 65.61 | 72.40  |
| Min                       | 76.34 | 69.35 | 24.81 | 55.75 | 41.54  | 10.01 | 35.91  |
| CHL 88.4+TMP 0.35+VAN 80  |       |       |       |       |        |       |        |
| Median (n=32)             | 79.93 | 80.68 | 55.55 | 64.13 | 56.42  | 32.45 | 32.76  |
| Max                       | 89.78 | 95.28 | 69.28 | 70.64 | 64.37  | 69.49 | 40.49  |
| Min                       | 76.34 | 69.35 | 22.28 | 55.75 | 38.52  | 23.81 | 26.01  |
| CLI 13.3+TMP 0.35+TOB 4.1 |       |       |       |       |        |       |        |
| Median (n=32)             | 85.73 | 80.68 | 71.10 | 65.29 | 64.55  | 49.81 | 52.29  |
| Max                       | 93.78 | 95.28 | 84.19 | 76.70 | 70.55  | 65.61 | 59.53  |

|                           |        |       |       |       |       |       |       |
|---------------------------|--------|-------|-------|-------|-------|-------|-------|
| Min                       | 82.45  | 69.35 | 24.81 | 51.25 | 42.49 | 10.01 | 28.68 |
| CLI 13.3+TMP 0.35+VAN 80  |        |       |       |       |       |       |       |
| Median (n=32)             | 85.73  | 80.68 | 55.55 | 65.29 | 54.43 | 32.45 | 4.45  |
| Max                       | 93.78  | 95.28 | 69.28 | 76.70 | 62.33 | 69.49 | 13.28 |
| Min                       | 82.45  | 69.35 | 22.28 | 51.25 | 10.37 | 23.81 | -5.76 |
| ERY 3.62+TMP 0.35+TOB 4.1 |        |       |       |       |       |       |       |
| Median (n=32)             | 102.45 | 80.68 | 71.10 | 80.64 | 76.22 | 49.81 | 55.93 |
| Max                       | 112.12 | 95.28 | 84.19 | 90.64 | 84.26 | 65.61 | 74.32 |
| Min                       | 92.26  | 69.35 | 24.81 | 28.20 | 69.30 | 10.01 | 16.58 |
| ERY 3.62+TMP 0.35+VAN 80  |        |       |       |       |       |       |       |
| Median (n=32)             | 102.45 | 80.68 | 55.55 | 80.64 | 71.42 | 32.45 | 36.28 |
| Max                       | 112.12 | 95.28 | 69.28 | 90.64 | 75.27 | 69.49 | 48.41 |
| Min                       | 92.26  | 69.35 | 22.28 | 28.20 | 29.07 | 23.81 | -3.16 |
| FOX 2.25+TMP 0.35+TOB 4.1 |        |       |       |       |       |       |       |
| Median (n=32)             | 80.36  | 80.68 | 71.10 | 77.11 | 34.80 | 49.81 | 39.56 |
| Max                       | 94.71  | 95.28 | 84.19 | 85.42 | 37.59 | 65.61 | 46.92 |
| Min                       | 35.04  | 69.35 | 24.81 | 38.63 | 31.22 | 10.01 | 21.13 |
| FOX 2.25+TMP 0.35+VAN 80  |        |       |       |       |       |       |       |
| Median (n=32)             | 80.36  | 80.68 | 55.55 | 77.11 | 19.46 | 32.45 | 21.86 |

|                         |       |       |       |       |        |       |        |
|-------------------------|-------|-------|-------|-------|--------|-------|--------|
| Max                     | 94.71 | 95.28 | 69.28 | 85.42 | 63.31  | 69.49 | 28.93  |
| Min                     | 35.04 | 69.35 | 22.28 | 38.63 | -6.12  | 23.81 | -1.79  |
| FUS 38+TMP 0.35+VAN 80  |       |       |       |       |        |       |        |
| Median (n=32)           | 68.42 | 80.68 | 55.55 | 46.93 | 33.16  | 32.45 | 6.59   |
| Max                     | 95.37 | 95.28 | 69.28 | 65.37 | 37.55  | 69.49 | 22.89  |
| Min                     | 32.92 | 69.35 | 22.28 | 7.87  | -11.89 | 23.81 | -11.29 |
| CHL 88.4+TOB 4.1+VAN 80 |       |       |       |       |        |       |        |
| Median (n=32)           | 79.93 | 71.10 | 55.55 | 73.13 | 56.42  | 64.45 | 50.35  |
| Max                     | 89.78 | 84.19 | 69.28 | 90.95 | 64.37  | 69.76 | 61.76  |
| Min                     | 76.34 | 24.81 | 22.28 | 41.54 | 38.52  | 29.72 | 11.29  |
| CLI 13.3+TOB 4.1+VAN 80 |       |       |       |       |        |       |        |
| Median (n=32)           | 85.73 | 71.10 | 55.55 | 64.55 | 54.43  | 64.45 | 48.20  |
| Max                     | 93.78 | 84.19 | 69.28 | 70.55 | 62.33  | 69.76 | 61.77  |
| Min                     | 82.45 | 24.81 | 22.28 | 42.49 | 10.37  | 29.72 | 11.14  |
| CPR 0.04+TOB 4.1+VAN 80 |       |       |       |       |        |       |        |
| Median (n=32)           | 68.75 | 71.10 | 55.55 | 56.65 | 27.31  | 64.45 | 21.98  |
| Max                     | 81.60 | 84.19 | 69.28 | 59.64 | 35.95  | 69.76 | 35.02  |
| Min                     | 61.44 | 24.81 | 22.28 | 7.91  | 7.10   | 29.72 | -14.55 |
| ERY 3.62+TOB 4.1+VAN 80 |       |       |       |       |        |       |        |

|                            |        |       |        |       |        |       |        |
|----------------------------|--------|-------|--------|-------|--------|-------|--------|
| Median (n=32)              | 102.45 | 71.10 | 55.55  | 76.22 | 71.42  | 64.45 | 59.31  |
| Max                        | 112.12 | 84.19 | 69.28  | 84.26 | 75.27  | 69.76 | 79.20  |
| Min                        | 92.26  | 24.81 | 22.28  | 69.30 | 29.07  | 29.72 | 18.07  |
| FOX 2.25+TOB 4.1+VAN 80    |        |       |        |       |        |       |        |
| Median (n=32)              | 80.36  | 71.10 | 55.55  | 34.80 | 19.46  | 64.45 | 23.09  |
| Max                        | 94.71  | 84.19 | 69.28  | 37.59 | 63.31  | 69.76 | 35.57  |
| Min                        | 35.04  | 24.81 | 22.28  | 31.22 | -6.12  | 29.72 | -7.43  |
| FUS 38+TOB 4.1+VAN 80      |        |       |        |       |        |       |        |
| Median (n=32)              | 68.42  | 71.10 | 55.55  | 61.10 | 33.16  | 64.45 | 3.82   |
| Max                        | 95.37  | 84.19 | 69.28  | 65.07 | 37.55  | 69.76 | 35.92  |
| Min                        | 32.92  | 24.81 | 22.28  | 44.23 | -11.89 | 29.72 | -15.38 |
| CPR 0.04+DOX 0.66+ERY 3.62 |        |       |        |       |        |       |        |
| Median (n=8)               | 68.75  | 66.74 | 102.45 | 40.45 | 63.47  | 38.07 | 37.80  |
| Max                        | 81.60  | 74.60 | 112.12 | 47.06 | 70.41  | 53.96 | 42.59  |
| Min                        | 61.44  | 59.94 | 92.26  | 25.69 | 59.44  | 32.72 | 30.86  |
| CPR 0.04+DOX 0.66+FOX 2.25 |        |       |        |       |        |       |        |
| Median (n=8)               | 68.75  | 66.74 | 80.36  | 40.45 | 28.68  | 14.61 | 18.14  |
| Max                        | 81.60  | 74.60 | 94.71  | 47.06 | 35.14  | 22.40 | 30.86  |
| Min                        | 61.44  | 59.94 | 35.04  | 25.69 | 23.57  | 3.46  | 2.73   |

|                           |       |        |       |       |       |        |       |
|---------------------------|-------|--------|-------|-------|-------|--------|-------|
| CPR 0.04+DOX 0.66+FUS 38  |       |        |       |       |       |        |       |
| Median (n=16)             | 68.75 | 66.74  | 68.42 | 40.45 | 61.41 | 21.11  | 18.18 |
| Max                       | 81.60 | 74.60  | 95.37 | 47.06 | 63.42 | 27.77  | 22.92 |
| Min                       | 61.44 | 59.94  | 32.92 | 25.69 | 55.16 | 4.66   | 11.14 |
| CPR 0.04+DOX 0.66+GEN 4.4 |       |        |       |       |       |        |       |
| Median (n=16)             | 68.75 | 66.74  | 73.83 | 40.45 | 43.85 | 47.29  | 34.74 |
| Max                       | 81.60 | 74.60  | 86.03 | 47.06 | 55.82 | 52.81  | 38.96 |
| Min                       | 61.44 | 59.94  | 60.41 | 25.69 | 40.21 | 42.22  | 26.90 |
| FOX 2.25+FUS 38+TOB 4.1   |       |        |       |       |       |        |       |
| Median (n=32)             | 80.36 | 68.42  | 71.10 | 19.20 | 34.80 | 61.10  | 12.20 |
| Max                       | 94.71 | 95.37  | 84.19 | 40.44 | 37.59 | 65.07  | 17.35 |
| Min                       | 35.04 | 32.92  | 24.81 | 12.82 | 31.22 | 44.23  | 7.72  |
| FOX 2.25+FUS 38+VAN 80    |       |        |       |       |       |        |       |
| Median (n=32)             | 80.36 | 68.42  | 55.55 | 19.20 | 19.46 | 33.16  | 2.18  |
| Max                       | 94.71 | 95.37  | 69.28 | 40.44 | 63.31 | 37.55  | 4.60  |
| Min                       | 35.04 | 32.92  | 22.28 | 12.82 | -6.12 | -11.89 | -0.90 |
| GEN 4.4+NTR 16.5+STR 8.47 |       |        |       |       |       |        |       |
| Median (n=16)             | 73.83 | 77.44  | 57.18 | 59.31 | 51.96 | -1.04  | 3.92  |
| Max                       | 86.03 | 103.36 | 77.02 | 64.50 | 66.18 | 6.07   | 11.33 |

|                           |       |        |       |       |       |       |       |
|---------------------------|-------|--------|-------|-------|-------|-------|-------|
| Min                       | 60.41 | 64.31  | 42.55 | 51.01 | 33.29 | -5.76 | -3.90 |
| GEN 4.4+NTR 16.5+TMP 0.35 |       |        |       |       |       |       |       |
| Median (n=16)             | 73.83 | 77.44  | 80.68 | 59.31 | 49.65 | 59.58 | 48.38 |
| Max                       | 86.03 | 103.36 | 95.28 | 64.50 | 72.97 | 76.21 | 49.45 |
| Min                       | 60.41 | 64.31  | 69.35 | 51.01 | 34.41 | 39.33 | 37.77 |
| GEN 4.4+NTR 16.5+TOB 4.1  |       |        |       |       |       |       |       |
| Median (n=32)             | 73.83 | 77.44  | 71.10 | 59.31 | 59.75 | 62.07 | 3.44  |
| Max                       | 86.03 | 103.36 | 84.19 | 64.50 | 76.66 | 71.72 | 8.93  |
| Min                       | 60.41 | 64.31  | 24.81 | 51.01 | 36.72 | 52.22 | -1.44 |
| GEN 4.4+NTR 16.5+VAN 80   |       |        |       |       |       |       |       |
| Median (n=32)             | 73.83 | 77.44  | 55.55 | 59.31 | 54.44 | 4.46  | 2.17  |
| Max                       | 86.03 | 103.36 | 69.28 | 64.50 | 68.70 | 7.53  | 7.12  |
| Min                       | 60.41 | 64.31  | 22.28 | 51.01 | 13.32 | 1.83  | -6.71 |
| FUS 38+GEN 4.4+STR 8.47   |       |        |       |       |       |       |       |
| Median (n=16)             | 68.42 | 73.83  | 57.18 | 50.98 | 50.71 | 51.96 | 43.18 |
| Max                       | 95.37 | 86.03  | 77.02 | 61.69 | 66.73 | 66.18 | 48.14 |
| Min                       | 32.92 | 60.41  | 42.55 | 41.91 | 39.23 | 33.29 | 24.95 |
| FUS 38+GEN 4.4+TMP 0.35   |       |        |       |       |       |       |       |
| Median (n=16)             | 68.42 | 73.83  | 80.68 | 50.98 | 46.93 | 49.65 | 49.76 |

|                            |       |        |       |       |        |       |       |
|----------------------------|-------|--------|-------|-------|--------|-------|-------|
| Max                        | 95.37 | 86.03  | 95.28 | 61.69 | 65.37  | 72.97 | 55.09 |
| Min                        | 32.92 | 60.41  | 69.35 | 41.91 | 7.87   | 34.41 | 32.98 |
| FUS 38+GEN 4.4+TOB 4.1     |       |        |       |       |        |       |       |
| Median (n=32)              | 68.42 | 73.83  | 71.10 | 50.98 | 61.10  | 59.75 | 44.46 |
| Max                        | 95.37 | 86.03  | 84.19 | 61.69 | 65.07  | 76.66 | 55.24 |
| Min                        | 32.92 | 60.41  | 24.81 | 41.91 | 44.23  | 36.72 | 21.77 |
| FUS 38+GEN 4.4+VAN 80      |       |        |       |       |        |       |       |
| Median (n=32)              | 68.42 | 73.83  | 55.55 | 50.98 | 33.16  | 54.44 | 12.66 |
| Max                        | 95.37 | 86.03  | 69.28 | 61.69 | 37.55  | 68.70 | 43.41 |
| Min                        | 32.92 | 60.41  | 22.28 | 41.91 | -11.89 | 13.32 | 4.47  |
| CPR 0.04+ERY 3.62+FOX 2.25 |       |        |       |       |        |       |       |
| Median (n=16)              | 68.75 | 102.45 | 80.36 | 63.47 | 28.68  | 62.01 | 26.10 |
| Max                        | 81.60 | 112.12 | 94.71 | 70.41 | 35.14  | 71.19 | 35.69 |
| Min                        | 61.44 | 92.26  | 35.04 | 59.44 | 23.57  | 51.25 | 15.84 |
| CPR 0.04+ERY 3.62+FUS 38   |       |        |       |       |        |       |       |
| Median (n=16)              | 68.75 | 102.45 | 68.42 | 63.47 | 61.41  | 52.31 | 56.37 |
| Max                        | 81.60 | 112.12 | 95.37 | 70.41 | 63.42  | 65.73 | 62.23 |
| Min                        | 61.44 | 92.26  | 32.92 | 59.44 | 55.16  | 36.58 | 46.62 |
| CPR 0.04+ERY 3.62+GEN 4.4  |       |        |       |       |        |       |       |



|                            |       |        |        |       |       |       |       |
|----------------------------|-------|--------|--------|-------|-------|-------|-------|
| Median (n=16)              | 68.75 | 102.45 | 73.83  | 63.47 | 43.85 | 67.28 | 55.39 |
| Max                        | 81.60 | 112.12 | 86.03  | 70.41 | 55.82 | 78.35 | 66.28 |
| Min                        | 61.44 | 92.26  | 60.41  | 59.44 | 40.21 | 21.17 | 50.00 |
| CPR 0.04+ERY 3.62+NTR 16.5 |       |        |        |       |       |       |       |
| Median (n=16)              | 68.75 | 102.45 | 77.44  | 63.47 | 40.46 | 84.06 | 51.25 |
| Max                        | 81.60 | 112.12 | 103.36 | 70.41 | 47.50 | 87.25 | 59.39 |
| Min                        | 61.44 | 92.26  | 64.31  | 59.44 | 34.96 | 79.31 | 42.98 |
| CPR 0.04+ERY 3.62+STR 8.47 |       |        |        |       |       |       |       |
| Median (n=16)              | 68.75 | 102.45 | 57.18  | 63.47 | 46.40 | 55.73 | 45.13 |
| Max                        | 81.60 | 112.12 | 77.02  | 70.41 | 50.59 | 64.57 | 55.90 |
| Min                        | 61.44 | 92.26  | 42.55  | 59.44 | 32.43 | 34.13 | 23.90 |
| CPR 0.04+ERY 3.62+TMP 0.35 |       |        |        |       |       |       |       |
| Median (n=16)              | 68.75 | 102.45 | 80.68  | 63.47 | 38.56 | 80.64 | 44.18 |
| Max                        | 81.60 | 112.12 | 95.28  | 70.41 | 50.13 | 90.64 | 52.61 |
| Min                        | 61.44 | 92.26  | 69.35  | 59.44 | 7.17  | 28.20 | 36.53 |
| CPR 0.04+ERY 3.62+TOB 4.1  |       |        |        |       |       |       |       |
| Median (n=32)              | 68.75 | 102.45 | 71.10  | 63.47 | 56.65 | 76.22 | 53.71 |
| Max                        | 81.60 | 112.12 | 84.19  | 70.41 | 59.64 | 84.26 | 62.45 |
| Min                        | 61.44 | 92.26  | 24.81  | 59.44 | 7.91  | 69.30 | 35.98 |

|                                   |       |        |       |       |        |       |       |
|-----------------------------------|-------|--------|-------|-------|--------|-------|-------|
| <b>CPR 0.04+ERY 3.62+VAN 80</b>   |       |        |       |       |        |       |       |
| Median (n=32)                     | 68.75 | 102.45 | 55.55 | 63.47 | 27.31  | 71.42 | 28.39 |
| Max                               | 81.60 | 112.12 | 69.28 | 70.41 | 35.95  | 75.27 | 38.47 |
| Min                               | 61.44 | 92.26  | 22.28 | 59.44 | 7.10   | 29.07 | 21.99 |
| <b>DOX 0.66+STR 8.47+TMP 0.35</b> |       |        |       |       |        |       |       |
| Median (n=16)                     | 66.74 | 57.18  | 80.68 | 21.72 | 54.35  | 46.20 | 26.81 |
| Max                               | 74.60 | 77.02  | 95.28 | 44.29 | 70.73  | 59.14 | 46.29 |
| Min                               | 59.94 | 42.55  | 69.35 | 6.56  | 30.60  | 39.27 | 20.09 |
| <b>DOX 0.66+STR 8.47+TOB 4.1</b>  |       |        |       |       |        |       |       |
| Median (n=32)                     | 66.74 | 57.18  | 71.10 | 21.72 | 54.27  | 56.45 | 6.40  |
| Max                               | 74.60 | 77.02  | 84.19 | 44.29 | 58.95  | 65.02 | 22.07 |
| Min                               | 59.94 | 42.55  | 24.81 | 6.56  | 36.63  | 50.40 | 1.45  |
| <b>DOX 0.66+STR 8.47+VAN 80</b>   |       |        |       |       |        |       |       |
| Median (n=32)                     | 66.74 | 57.18  | 55.55 | 21.72 | 11.12  | 35.57 | 7.87  |
| Max                               | 74.60 | 77.02  | 69.28 | 44.29 | 18.14  | 39.85 | 13.77 |
| Min                               | 59.94 | 42.55  | 22.28 | 6.56  | -12.51 | 10.50 | -5.52 |
| <b>FUS 38+NTR 16.5+TMP 0.35</b>   |       |        |       |       |        |       |       |
| Median (n=16)                     | 68.42 | 77.44  | 80.68 | 72.18 | 46.93  | 59.58 | 64.67 |
| Max                               | 95.37 | 103.36 | 95.28 | 80.76 | 65.37  | 76.21 | 73.30 |

|                            |       |        |       |       |        |       |        |
|----------------------------|-------|--------|-------|-------|--------|-------|--------|
| Min                        | 32.92 | 64.31  | 69.35 | 49.42 | 7.87   | 39.33 | 21.22  |
| FUS 38+NTR 16.5+TOB 4.1    |       |        |       |       |        |       |        |
| Median (n=32)              | 68.42 | 77.44  | 71.10 | 72.18 | 61.10  | 62.07 | 48.97  |
| Max                        | 95.37 | 103.36 | 84.19 | 80.76 | 65.07  | 71.72 | 62.46  |
| Min                        | 32.92 | 64.31  | 24.81 | 49.42 | 44.23  | 52.22 | 30.09  |
| FUS 38+NTR 16.5+VAN 80     |       |        |       |       |        |       |        |
| Median (n=32)              | 68.42 | 77.44  | 55.55 | 72.18 | 33.16  | 4.46  | 3.67   |
| Max                        | 95.37 | 103.36 | 69.28 | 80.76 | 37.55  | 7.53  | 13.68  |
| Min                        | 32.92 | 64.31  | 22.28 | 49.42 | -11.89 | 1.83  | -11.43 |
| CPR 0.04+FOX 2.25+FUS 38   |       |        |       |       |        |       |        |
| Median (n=16)              | 68.75 | 80.36  | 68.42 | 28.68 | 61.41  | 19.20 | 26.29  |
| Max                        | 81.60 | 94.71  | 95.37 | 35.14 | 63.42  | 40.44 | 32.90  |
| Min                        | 61.44 | 35.04  | 32.92 | 23.57 | 55.16  | 12.82 | 15.65  |
| CPR 0.04+FOX 2.25+GEN 4.4  |       |        |       |       |        |       |        |
| Median (n=16)              | 68.75 | 80.36  | 73.83 | 28.68 | 43.85  | 29.60 | 19.16  |
| Max                        | 81.60 | 94.71  | 86.03 | 35.14 | 55.82  | 33.33 | 29.00  |
| Min                        | 61.44 | 35.04  | 60.41 | 23.57 | 40.21  | 25.33 | 7.06   |
| CPR 0.04+FOX 2.25+NTR 16.5 |       |        |       |       |        |       |        |
| Median (n=16)              | 68.75 | 80.36  | 77.44 | 28.68 | 40.46  | 46.66 | 25.52  |

|                            |       |       |        |       |       |       |       |
|----------------------------|-------|-------|--------|-------|-------|-------|-------|
| Max                        | 81.60 | 94.71 | 103.36 | 35.14 | 47.50 | 57.85 | 36.00 |
| Min                        | 61.44 | 35.04 | 64.31  | 23.57 | 34.96 | 34.72 | 16.38 |
| CPR 0.04+FOX 2.25+STR 8.47 |       |       |        |       |       |       |       |
| Median (n=16)              | 68.75 | 80.36 | 57.18  | 28.68 | 46.40 | 30.49 | 21.81 |
| Max                        | 81.60 | 94.71 | 77.02  | 35.14 | 50.59 | 48.88 | 36.38 |
| Min                        | 61.44 | 35.04 | 42.55  | 23.57 | 32.43 | -5.18 | 19.44 |
| CPR 0.04+FOX 2.25+TMP 0.35 |       |       |        |       |       |       |       |
| Median (n=16)              | 68.75 | 80.36 | 80.68  | 28.68 | 38.56 | 77.11 | 36.69 |
| Max                        | 81.60 | 94.71 | 95.28  | 35.14 | 50.13 | 85.42 | 40.16 |
| Min                        | 61.44 | 35.04 | 69.35  | 23.57 | 7.17  | 38.63 | 26.99 |
| CPR 0.04+FOX 2.25+TOB 4.1  |       |       |        |       |       |       |       |
| Median (n=32)              | 68.75 | 80.36 | 71.10  | 28.68 | 56.65 | 34.80 | 24.82 |
| Max                        | 81.60 | 94.71 | 84.19  | 35.14 | 59.64 | 37.59 | 27.09 |
| Min                        | 61.44 | 35.04 | 24.81  | 23.57 | 7.91  | 31.22 | 2.60  |
| CPR 0.04+FOX 2.25+VAN 80   |       |       |        |       |       |       |       |
| Median (n=32)              | 68.75 | 80.36 | 55.55  | 28.68 | 27.31 | 19.46 | 21.40 |
| Max                        | 81.60 | 94.71 | 69.28  | 35.14 | 35.95 | 63.31 | 26.88 |
| Min                        | 61.44 | 35.04 | 22.28  | 23.57 | 7.10  | -6.12 | 16.89 |
| DOX 0.66+TMP 0.35+TOB 4.1  |       |       |        |       |       |       |       |

|                          |       |        |       |       |        |       |        |
|--------------------------|-------|--------|-------|-------|--------|-------|--------|
| Median (n=32)            | 66.74 | 80.68  | 71.10 | 54.35 | 54.27  | 49.81 | 44.83  |
| Max                      | 74.60 | 95.28  | 84.19 | 70.73 | 58.95  | 65.61 | 64.95  |
| Min                      | 59.94 | 69.35  | 24.81 | 30.60 | 36.63  | 10.01 | 28.27  |
| DOX 0.66+TMP 0.35+VAN 80 |       |        |       |       |        |       |        |
| Median (n=32)            | 66.74 | 80.68  | 55.55 | 54.35 | 11.12  | 32.45 | 13.26  |
| Max                      | 74.60 | 95.28  | 69.28 | 70.73 | 18.14  | 69.49 | 26.92  |
| Min                      | 59.94 | 69.35  | 22.28 | 30.60 | -12.51 | 23.81 | -2.55  |
| FUS 38+NTR 16.5+STR 8.47 |       |        |       |       |        |       |        |
| Median (n=16)            | 68.42 | 77.44  | 57.18 | 72.18 | 50.71  | -1.04 | 4.82   |
| Max                      | 95.37 | 103.36 | 77.02 | 80.76 | 66.73  | 6.07  | 68.67  |
| Min                      | 32.92 | 64.31  | 42.55 | 49.42 | 39.23  | -5.76 | -14.92 |
| FUS 38+STR 8.47+TMP 0.35 |       |        |       |       |        |       |        |
| Median (n=16)            | 68.42 | 57.18  | 80.68 | 50.71 | 46.93  | 59.58 | 50.94  |
| Max                      | 95.37 | 77.02  | 95.28 | 66.73 | 65.37  | 76.21 | 62.41  |
| Min                      | 32.92 | 42.55  | 69.35 | 39.23 | 7.87   | 39.33 | 12.08  |
| FUS 38+STR 8.47+TOB 4.1  |       |        |       |       |        |       |        |
| Median (n=32)            | 68.42 | 57.18  | 71.10 | 50.71 | 61.10  | 62.07 | 45.73  |
| Max                      | 95.37 | 77.02  | 84.19 | 66.73 | 65.07  | 71.72 | 66.65  |
| Min                      | 32.92 | 42.55  | 24.81 | 39.23 | 44.23  | 52.22 | 8.11   |

|                          |       |       |        |       |       |       |       |
|--------------------------|-------|-------|--------|-------|-------|-------|-------|
| CPR 0.04+FUS 38+GEN 4.4  |       |       |        |       |       |       |       |
| Median (n=16)            | 68.75 | 68.42 | 73.83  | 61.41 | 43.85 | 50.98 | 56.05 |
| Max                      | 81.60 | 95.37 | 86.03  | 63.42 | 55.82 | 61.69 | 64.47 |
| Min                      | 61.44 | 32.92 | 60.41  | 55.16 | 40.21 | 41.91 | 23.35 |
| CPR 0.04+FUS 38+NTR 16.5 |       |       |        |       |       |       |       |
| Median (n=16)            | 68.75 | 68.42 | 77.44  | 61.41 | 40.46 | 72.18 | 62.83 |
| Max                      | 81.60 | 95.37 | 103.36 | 63.42 | 47.50 | 80.76 | 67.93 |
| Min                      | 61.44 | 32.92 | 64.31  | 55.16 | 34.96 | 49.42 | 56.00 |
| CPR 0.04+FUS 38+STR 8.47 |       |       |        |       |       |       |       |
| Median (n=16)            | 68.75 | 68.42 | 57.18  | 61.41 | 46.40 | 50.71 | 52.11 |
| Max                      | 81.60 | 95.37 | 77.02  | 63.42 | 50.59 | 66.73 | 57.84 |
| Min                      | 61.44 | 32.92 | 42.55  | 55.16 | 32.43 | 39.23 | 40.92 |
| CPR 0.04+FUS 38+TMP 0.35 |       |       |        |       |       |       |       |
| Median (n=16)            | 68.75 | 68.42 | 80.68  | 61.41 | 38.56 | 46.93 | 52.27 |
| Max                      | 81.60 | 95.37 | 95.28  | 63.42 | 50.13 | 65.37 | 58.21 |
| Min                      | 61.44 | 32.92 | 69.35  | 55.16 | 7.17  | 7.87  | 46.93 |
| CPR 0.04+FUS 38+TOB 4.1  |       |       |        |       |       |       |       |
| Median (n=32)            | 68.75 | 68.42 | 71.10  | 61.41 | 56.65 | 61.10 | 57.46 |
| Max                      | 81.60 | 95.37 | 84.19  | 63.42 | 59.64 | 65.07 | 66.07 |

|                         |       |       |       |       |        |        |        |
|-------------------------|-------|-------|-------|-------|--------|--------|--------|
| Min                     | 61.44 | 32.92 | 24.81 | 55.16 | 7.91   | 44.23  | 51.62  |
| CPR 0.04+FUS 38+VAN 80  |       |       |       |       |        |        |        |
| Median (n=32)           | 68.75 | 68.42 | 55.55 | 61.41 | 27.31  | 33.16  | 12.18  |
| Max                     | 81.60 | 95.37 | 69.28 | 63.42 | 35.95  | 37.55  | 16.88  |
| Min                     | 61.44 | 32.92 | 22.28 | 55.16 | 7.10   | -11.89 | -9.14  |
| DOX 0.66+TOB 4.1+VAN 80 |       |       |       |       |        |        |        |
| Median (n=32)           | 66.74 | 71.10 | 55.55 | 54.27 | 11.12  | 64.45  | 12.26  |
| Max                     | 74.60 | 84.19 | 69.28 | 58.95 | 18.14  | 69.76  | 17.38  |
| Min                     | 59.94 | 24.81 | 22.28 | 36.63 | -12.51 | 29.72  | -10.51 |
| FUS 38+TMP 0.35+TOB 4.1 |       |       |       |       |        |        |        |
| Median (n=32)           | 68.42 | 80.68 | 71.10 | 46.93 | 61.10  | 49.81  | 53.48  |
| Max                     | 95.37 | 95.28 | 84.19 | 65.37 | 65.07  | 65.61  | 65.54  |
| Min                     | 32.92 | 69.35 | 24.81 | 7.87  | 44.23  | 10.01  | -0.05  |
| AMP 3.56+TOB 4.1+VAN 80 |       |       |       |       |        |        |        |
| Median (n=32)           | 79.51 | 71.10 | 55.55 | 47.33 | 9.58   | 64.45  | 22.81  |
| Max                     | 98.05 | 84.19 | 69.28 | 50.75 | 32.33  | 69.76  | 26.88  |
| Min                     | 64.70 | 24.81 | 22.28 | 38.11 | -5.26  | 29.72  | 11.50  |

**Supplementary Table 2.** Emergent suppressive three-drug combinations from 14 antibiotics (see Materials and Methods, Fig 1) for *E. coli* CFT073, *E. coli* BW25113, *S. epidermidis* 14990.

| <i>E. coli</i> CFT073 |         | <i>E. coli</i> BW25113 |          | <i>S. epidermidis</i> 14990 |         |
|-----------------------|---------|------------------------|----------|-----------------------------|---------|
| Combinations          | E3      | Combinations           | E3       | Combinations                | E3      |
| AMP+CHL+VAN           | 1.7231  | CLI+ERY+TOB            | 1.7323   | AMP+CPR+TOB                 | 4.4405  |
| AMP+CLI+DOX           | 2.1715  | CLI+FOX+STR            | 2.4922   | CHL+FUS+STR                 | 1.6223  |
| AMP+CLI+FUS           | 1.4327  | CLI+FOX+TOB            | 2.2007   | CHL+CLI+GEN                 | 1.3818  |
| AMP+CLI+VAN           | 2.3609  | CPR+ERY+STR            | 3.7891   | CLI+FUS+STR                 | 3.7604  |
| AMP+TMP+VAN           | 5.3773  | CPR+ERY+TOB            | 1.5561   | CLI+GEN+TMP                 | 3.8297  |
| AMP+DOX+NTR           | 3.8918  | CPR+FOX+TOB            | 1.6954   | CLI+ERY+GEN                 | 7.4911  |
| AMP+ERY+NTR           | 6.1195  | ERY+FOX+STR            | 13.8269  | CLI+FOX+GEN                 | 3.4186  |
| DOX+ERY+NTR           | 4.6264  | ERY+FOX+TOB            | 3.92     | CLI+FOX+TMP                 | 1.5959  |
| DOX+ERY+TOB           | 4.8466  | AMP+CPR+NTR            | 131.6786 | FUS+GEN+TMP                 | 3.1702  |
| AMP+FOX+NTR           | 1.3583  | NTR+CPR+FOX            | 2.9006   | FUS+STR+VAN                 | 68.1655 |
| DOX+FOX+NTR           | 1.8473  | NTR+CLI+FOX            | 2.5142   | CPR+FUS+GEN                 | 8.3327  |
| DOX+FOX+TOB           | 1.7685  | NTR+CLI+TOB            | 2.1255   | CPR+FUS+TMP                 | 3.8593  |
| AMP+FUS+NTR           | 25.6027 | NTR+ERY+STR            | 2.213    | CPR+FUS+TOB                 | 4.6025  |
| AMP+FUS+TMP           | 1.5329  | NTR+ERY+TOB            | 1.8461   | FUS+STR+TMP                 | 3.3908  |
| DOX+FUS+NTR           | 3.1113  | GEN+TMP+FOX            | 1.9109   | FOX+FUS+STR                 | 2.1196  |
| AMP+GEN+STR           | 1.4666  | GEN+CHL+TMP            | 4.5399   | STR+TOB+VAN                 | 2.3048  |
| AMP+GEN+TMP           | 2.6184  | GEN+NTR+FOX            | 30.5413  | FUS+TMP+VAN                 | 2.5293  |
| CHL+CLI+CPR           | 1.5146  | GEN+TOB+FOX            | 1.5219   | CLI+ERY+NTR                 | 1.3222  |
| CHL+CLI+ERY           | 1.3513  | GEN+CLI+TOB            | 2.0188   | CPR+ERY+NTR                 | 6.1404  |
| CHL+CLI+GEN           | 1.5158  | GEN+CHL+FOX            | 1.9254   | CPR+NTR+VAN                 | 59.6593 |
| CPR+GEN+TOB           | 1.6777  | GEN+ERY+FOX            | 2.3976   | FOX+GEN+NTR                 | 1.999   |
| CHL+CPR+GEN           | 9.4774  | FUS+CHL+TOB            | 1.8968   | FOX+NTR+STR                 | 1.468   |



|             |         |             |          |             |        |
|-------------|---------|-------------|----------|-------------|--------|
| CHL+CPR+NTR | 2.3141  | VAN+CHL+TMP | 4.3274   | FUS+GEN+NTR | 2.0084 |
| CHL+CPR+TMP | 2.7167  | CHL+TMP+CPR | 2.5219   | FUS+NTR+TMP | 1.5059 |
| CHL+FOX+TMP | 2.0377  | CHL+AMP+TOB | 2.4369   | CLI+CPR+STR | 2.1775 |
| CPR+NTR+STR | 5.2644  | CHL+CPR+CLI | 3.1859   | DOX+ERY+FOX | 1.5507 |
| CHL+DOX+ERY | 6.0661  | CHL+CPR+FOX | 2.314    | AMP+STR+TMP | 2.6504 |
| CHL+ERY+FUS | 1.5534  | CHL+FOX+STR | 69.0205  | GEN+STR+TMP | 1.9295 |
| CHL+ERY+GEN | 3.0295  | CHL+FOX+NTR | 60.0554  | DOX+STR+TMP | 2.1796 |
| CPR+TMP+TOB | 1.8925  | TMP+ERY+STR | 306.9707 | CPR+STR+TMP | 2.5767 |
| CLI+FUS+NTR | 1.5853  | TMP+ERY+TOB | 5.0596   | CPR+DOX+STR | 2.1326 |
| ERY+FOX+TMP | 43.9075 | VAN+STR+ERY | 2.1534   | CPR+DOX+ERY | 3.115  |
| ERY+FOX+VAN | 4.9611  | VAN+CHL+STR | 1.7914   | AMP+GEN+VAN | 7.2899 |
| ERY+FUS+GEN | 1.5191  | VAN+CHL+CLI | 32.7416  | DOX+ERY+TOB | 7.2241 |
| ERY+FUS+TOB | 9.3363  | FUS+NTR+STR | 45.9139  | DOX+ERY+VAN | 8.2728 |
| ERY+GEN+NTR | 55.9415 | GEN+CHL+CPR | 2.7453   |             |        |
| ERY+GEN+STR | 2.1248  | DOX+GEN+FOX | 1.9964   |             |        |
| ERY+GEN+TMP | 2.4965  | DOX+FOX+CPR | 1.3859   |             |        |
| ERY+NTR+STR | 1.5997  | DOX+TOB+CPR | 2.2834   |             |        |
| CLI+CPR+DOX | 1.5056  | DOX+CHL+TMP | 1.4192   |             |        |
| DOX+NTR+STR | 1.4262  | DOX+CHL+FOX | 2.9094   |             |        |
| CLI+DOX+ERY | 3.077   | DOX+CPR+ERY | 10.64    |             |        |
| CLI+DOX+FOX | 1.9993  | DOX+NTR+AMP | 35.2697  |             |        |
| CLI+DOX+FUS | 2.993   | DOX+VAN+NTR | 1.7336   |             |        |
| CLI+DOX+NTR | 1.731   | DOX+VAN+CLI | 1.9177   |             |        |
| CLI+DOX+STR | 6.6398  | DOX+TMP+STR | 8.8322   |             |        |
| CLI+DOX+VAN | 2.7423  |             |          |             |        |
| CLI+GEN+NTR | 2.2981  |             |          |             |        |

|             |         |
|-------------|---------|
| CLI+GEN+STR | 1.3187  |
| CLI+GEN+TMP | 1.6645  |
| CLI+GEN+TOB | 1.36    |
| CLI+ERY+FUS | 1.8109  |
| CLI+ERY+GEN | 2.4136  |
| CLI+ERY+NTR | 3.5567  |
| CLI+ERY+STR | 3.1921  |
| CLI+ERY+TMP | 3.0736  |
| CLI+ERY+TOB | 3.3542  |
| CLI+NTR+STR | 22.9036 |
| CLI+NTR+TOB | 1.6425  |
| CLI+FOX+FUS | 2.2916  |
| CLI+FOX+GEN | 1.5537  |
| CLI+FOX+TMP | 4.7128  |
| CLI+FOX+VAN | 2.6637  |
| CLI+STR+TMP | 2.0782  |
| FOX+FUS+NTR | 4.9262  |
| FOX+FUS+TMP | 6.9777  |
| FOX+GEN+TMP | 3.4398  |
| NTR+STR+TMP | 5.0348  |
| FOX+NTR+STR | 1.3498  |
| NTR+TMP+TOB | 1.46    |
| NTR+TMP+VAN | 1.4826  |
| CHL+STR+TMP | 12.4006 |
| CLI+TMP+TOB | 1.3554  |
| FOX+TMP+TOB | 2.17    |

|             |         |
|-------------|---------|
| FOX+TMP+VAN | 1.3481  |
| CPR+ERY+FUS | 1.7253  |
| CPR+ERY+GEN | 2.3743  |
| CPR+ERY+NTR | 22.3366 |
| CPR+ERY+TMP | 2.3071  |
| DOX+STR+TMP | 2.3158  |
| FUS+NTR+TMP | 5.0862  |
| CPR+FOX+FUS | 1.5605  |
| CPR+FOX+TMP | 1.7484  |
| FUS+STR+TMP | 3.589   |
| CPR+FUS+GEN | 5.1754  |
| CPR+FUS+STR | 2.7441  |
| CPR+FUS+TMP | 3.1839  |
| FUS+TMP+TOB | 1.7543  |

## Supplementary References

Tekin, E., Beppler, C., White, C., Mao, Z., Savage, V. M. and Yeh, P. J. (2016)

'Enhanced identification of synergistic and antagonistic emergent interactions among three or more drugs', *J R Soc Interface*, 13(119).
